# Supplementary material for: A Comparison of Two DNA Metagenomic Bioinformatic Pipelines While Evaluating the Microbial Diversity in Feces of Tanzanian Small Holder Dairy Cattle
Source: Biomed Res Int. 2020 Apr 22;2020:2348560. doi: 10.1155/2020/2348560 (PMC7195676; doi:10.1155/2020/2348560)
Supplement: Supplementary Materials — The supplementary material provided is a full list of OTUs (in all taxonomic ranks) identified by the two pipelines (MG-RAST and Kraken). [file 2348560.f1.xls]

## Sheet: Kraken_Bacteria_Phylum
Taxa	TRZ1429	TRZ1464	TRZ1469	TRZ1474	TRZ1480	TRZ505	TRZ511	TRZ531	TRZ562	TRZ577	TRZ578	TRZ674	TRZ677	TRZ679	TRZ689	TRZ718	TRZ728	TRZ721	Lushoto (Mean)	Lushoto (SD)	TMP17787	TMP17871	TMP17852	TMP17811	TMP17800	TMP17921	TMP17909	TMP17891	TMP17788	TMP17926	TMP17982	TMP18001	TMP18016	TMP18023	TMP18027	TMP18032	TMP18046	TMP18060	Rungwe (Mean)	Rungwe (SD)
Proteobacteria	90.5408	90.8592	38.7669	95.1601	30.5096	30.0576	92.3277	87.5296	92.7292	94.2801	37.7853	90.8592	97.6148	92.7241	62.3191	97.6154	77.5616	46.3125	74.7529	25.0749	37.7853	92.7292	90.5408	24.0536	92.3277	28.9578	94.2801	92.7241	95.1825	64.4919	63.372	78.9295	70.6733	95.1601	95.1825	87.5296	91.7492	91.7492	77.0788	23.3136
Firmicutes	2.17886	1.59724	35.1322	1.97351	34.6535	34.3725	3.01481	2.47083	1.25972	0.668097	30.3157	1.59724	1.17286	2.56701	8.06164	1.17287	3.0723	25.6582	10.6077	13.5058	30.3157	1.25972	2.17886	36.1902	3.01481	40.9653	0.668097	2.56701	0.951383	7.01964	8.05902	4.57999	6.27767	1.97351	0.951383	2.47083	4.17164	4.17164	8.76591	12.3995
Bacteroidetes	5.5234	3.3664	15.7656	1.81626	22.6191	22.7938	2.9042	6.23005	2.87623	2.51812	20.3841	3.3664	0.536116	0.998462	21.0168	0.536119	15.7945	18.6374	9.31573	8.47083	20.3841	2.87623	5.5234	25.0532	2.9042	20.2938	2.51812	0.998462	2.38928	20.1518	18.9994	11.3069	15.9044	1.81626	2.38928	6.23005	2.22901	2.22901	9.12205	8.24314
Actinobacteria	1.2696	1.354	6.18911	0.643325	7.20475	7.1477	1.11372	1.44347	1.16446	1.60057	7.06707	1.354	0.378989	1.44777	5.34524	0.378991	2.57717	5.88151	2.97563	2.5494	7.06707	1.16446	1.2696	7.54398	1.11372	4.67527	1.60057	1.44777	0.966966	5.20353	5.57583	3.49404	4.54748	0.643325	0.966966	1.44347	1.04404	1.04404	2.8229	2.25763
Tenericutes	0.101444	2.35075	0.5166	0.100073	0.635751	0.823135	0.0876079	1.61534	1.63209	0.6146	0.645657	2.35075	0.14418	1.78435	0.448637	0.144181	0.120157	0.313344	0.801591	0.762662	0.645657	1.63209	0.101444	1.20555	0.0876079	0.926816	0.6146	1.78435	0.165345	0.341588	0.474985	0.237435	0.528086	0.100073	0.165345	1.61534	0.388827	0.388827	0.633554	0.547796
Cyanobacteria	0.100822	0.129242	0.898581	0.0799283	1.09077	1.134	0.133602	0.235194	0.0946811	0.116948	0.980681	0.129242	0.0423714	0.147354	0.705221	0.0423716	0.244458	0.834384	0.396659	0.397017	0.980681	0.0946811	0.100822	1.49259	0.133602	1.0092	0.116948	0.147354	0.10215	0.624348	0.712477	0.356152	0.505825	0.0799283	0.10215	0.235194	0.125944	0.125944	0.391444	0.402543
Spirochaetes	0.0423201	0.0542574	0.513235	0.0337908	0.604989	0.774973	0.0700863	0.129227	0.0346394	0.0149296	0.545938	0.0542574	0.0170663	0.0603908	0.367206	0.0170664	0.097369	0.414191	0.213663	0.242473	0.545938	0.0346394	0.0423201	1.04008	0.0700863	0.741453	0.0149296	0.0603908	0.0233734	0.3321	0.401641	0.179951	0.280739	0.0337908	0.0233734	0.129227	0.0534762	0.0534762	0.225611	0.282115
Fusobacteria	0.049166	0.0621826	0.373568	0.0526357	0.388372	0.507892	0.0788471	0.0697828	0.0207837	0.0124413	0.359415	0.0621826	0.0194202	0.0539492	0.195126	0.0194203	0.0932256	0.234108	0.147362	0.152109	0.359415	0.0207837	0.049166	0.665248	0.0788471	0.55609	0.0124413	0.0539492	0.0181793	0.146124	0.213045	0.10997	0.162012	0.0526357	0.0181793	0.0697828	0.0544758	0.0544758	0.149712	0.183934
Verrucomicrobia	0.0199154	0.0201179	0.200246	0.0142961	0.372991	0.385297	0.0262824	0.0206764	0.0144331	0.0199061	0.31135	0.0201179	0.0070619	0.0241563	0.175153	0.00706194	0.0497203	0.247314	0.107561	0.132182	0.31135	0.0144331	0.0199154	0.314051	0.0262824	0.199094	0.0199061	0.0241563	0.0225077	0.203055	0.190343	0.10747	0.149645	0.0142961	0.0225077	0.0206764	0.0119947	0.0119947	0.0935377	0.103637
Deinococcus-Thermus	0.0317401	0.0396262	0.227169	0.029242	0.260196	0.260514	0.0372333	0.0361837	0.0346394	0.0423004	0.22598	0.0396262	0.0123583	0.0434814	0.158252	0.0123584	0.0704371	0.202893	0.0980128	0.0910981	0.22598	0.0346394	0.0317401	0.256644	0.0372333	0.226555	0.0423004	0.0434814	0.03809	0.125249	0.17288	0.119967	0.131094	0.029242	0.03809	0.0361837	0.0374833	0.0374833	0.0924631	0.0769822
Chloroflexi	0.0255166	0.0304817	0.213708	0.0207943	0.258915	0.264892	0.0208069	0.0323068	0.0155877	0.0186619	0.220241	0.0304817	0.00529642	0.0209355	0.139815	0.00529645	0.0352186	0.192088	0.086169	0.0945516	0.220241	0.0155877	0.0255166	0.275217	0.0208069	0.171633	0.0186619	0.0209355	0.0328959	0.110067	0.118746	0.0724801	0.0791511	0.0207943	0.0328959	0.0323068	0.0204909	0.0204909	0.0727177	0.0755917
Chlorobi	0.00933532	0.0128023	0.158177	0.00649823	0.175601	0.194838	0.0153314	0.0258455	0.0138558	0.0130634	0.167153	0.0128023	0.00470793	0.00885732	0.106014	0.00470796	0.0331469	0.148868	0.0617558	0.0704961	0.167153	0.0138558	0.00933532	0.222875	0.0153314	0.185363	0.0130634	0.00885732	0.0138509	0.102477	0.097791	0.0674814	0.0630735	0.00649823	0.0138509	0.0258455	0.0154931	0.0154931	0.0587605	0.0669811
Planctomycetes	0.0211601	0.018289	0.132936	0.0103972	0.175601	0.170757	0.021902	0.0232609	0.0225156	0.0180399	0.146349	0.018289	0.00941586	0.0136886	0.145961	0.00941592	0.0290035	0.10805	0.060835	0.0622408	0.146349	0.0225156	0.0211601	0.24989	0.021902	0.11671	0.0180399	0.0136886	0.0199107	0.178385	0.167642	0.0912249	0.143461	0.0103972	0.0199107	0.0232609	0.0149933	0.0149933	0.071913	0.0734335
Thermotogae	0.0112024	0.0134119	0.153129	0.00779788	0.180728	0.205784	0.0251873	0.0232609	0.0115465	0.00559858	0.149936	0.0134119	0.00353095	0.015299	0.0783579	0.00353097	0.0186451	0.10925	0.0572004	0.0677467	0.149936	0.0115465	0.0112024	0.236383	0.0251873	0.164767	0.00559858	0.015299	0.00519409	0.0683177	0.0506418	0.0237435	0.0507062	0.00779788	0.00519409	0.0232609	0.0104953	0.0104953	0.0486537	0.0646778
Acidobacteria	0.0136918	0.0201179	0.124523	0.00974735	0.114076	0.140108	0.0186167	0.0232609	0.0132784	0.0199061	0.107609	0.0201179	0.00647341	0.0193251	0.109086	0.00647344	0.0227885	0.128459	0.0509811	0.0499313	0.107609	0.0132784	0.0136918	0.143518	0.0186167	0.151037	0.0199061	0.0193251	0.0207763	0.0967834	0.0908059	0.0687311	0.0779144	0.00974735	0.0207763	0.0232609	0.0109951	0.0109951	0.0509871	0.0470364
Synergistetes	0.00497884	0.00426743	0.0807714	0.00324912	0.0986952	0.113838	0.00985589	0.00904591	0.00404127	0.00311032	0.0946963	0.00426743	0.00176547	0.011273	0.0507021	0.00176548	0.0227885	0.0660304	0.0325079	0.038751	0.0946963	0.00404127	0.00497884	0.111438	0.00985589	0.0617877	0.00311032	0.011273	0.00605977	0.0493405	0.0488955	0.0237435	0.0457592	0.00324912	0.00605977	0.00904591	0.00949577	0.00949577	0.0284625	0.0322537
Fibrobacteres	0.00124471	0.0018289	0.0471166	0.00194947	0.057679	0.0394054	0.00766569	0	0.000577324	0	0.0423264	0.0018289	0.00117698	0.000805211	0.232001	0.00117699	0.0331469	0.0420193	0.0284416	0.053278	0.0423264	0.000577324	0.00124471	0.0624726	0.00766569	0.0480571	0	0.000805211	0.00259704	0.413701	0.897581	0.0487366	0.119963	0.00194947	0.00259704	0	0.000999555	0.000999555	0.091793	0.217305
Aquificae	0.00311177	0.0054867	0.0572131	0.00454876	0.0833141	0.0853784	0.00876079	0.00387682	0.00577324	0.00248826	0.0710222	0.0054867	0.00353095	0.00483127	0.032265	0.00353097	0.0103584	0.0744342	0.0258562	0.0311567	0.0710222	0.00577324	0.00311177	0.0894877	0.00876079	0.0892489	0.00248826	0.00483127	0.00346272	0.0227726	0.0331791	0.0199945	0.0160776	0.00454876	0.00346272	0.00387682	0.00649711	0.00649711	0.0219496	0.0287871
Deferribacteres	0.00435648	0.00609633	0.0605785	0.00454876	0.0551155	0.0612973	0.0142363	0.00387682	0.00692789	0.00684271	0.0423264	0.00609633	0.00117698	0.00885732	0.0414836	0.00117699	0.0145018	0.0516237	0.0217289	0.0221882	0.0423264	0.00692789	0.00435648	0.0675379	0.0142363	0.0480571	0.00684271	0.00885732	0.00173136	0.0417497	0.0279403	0.0212442	0.0346286	0.00454876	0.00173136	0.00387682	0.008996	0.008996	0.0196992	0.0189297
Chlamydiae	0.0136918	0.00853487	0.0656267	0.00324912	0.0653695	0.0656757	0.00876079	0.00775364	0.00173197	0.00373239	0.045196	0.00853487	0.00235397	0.00241563	0.02151	0.00235398	0.00828672	0.0480221	0.0212667	0.0237429	0.045196	0.00173197	0.0136918	0.0827339	0.00876079	0.0549224	0.00373239	0.00241563	0.00259704	0.0322611	0.0244477	0.0199945	0.0259715	0.00324912	0.00259704	0.00775364	0.00699689	0.00699689	0.019225	0.0216449
Nitrospirae	0.01058	0.00670597	0.0487994	0.00324912	0.0512702	0.0481622	0.00766569	0.0116305	0.00461859	0.00311032	0.041609	0.00670597	0.00588491	0.0104677	0.0307286	0.00588495	0.0165734	0.045621	0.0199593	0.0179609	0.041609	0.00461859	0.01058	0.0692264	0.00766569	0.0480571	0.00311032	0.0104677	0.0043284	0.0208748	0.0157164	0.0137462	0.0284449	0.00324912	0.0043284	0.0116305	0.00349844	0.00349844	0.016925	0.0180689
Lentisphaerae	0.00311177	0.00487707	0.031972	0.00259929	0.0422979	0.0547297	0.0032853	0.00387682	0.00115465	0.000622065	0.0330002	0.00487707	0.000588491	0.00322085	0.053775	0.000588495	0.0207168	0.0276127	0.0162726	0.0187311	0.0330002	0.00115465	0.00311177	0.243136	0.0032853	0.0274612	0.000622065	0.00322085	0.00259704	0.0607268	0.0698507	0.0249931	0.0371021	0.00259929	0.00259704	0.00387682	0.000999555	0.000999555	0.028963	0.0560243
Gemmatimonadetes	0.00622355	0.0073156	0.0302893	0.000649823	0.0333256	0.0306487	0.00657059	0.00904591	0.00635056	0.00124413	0.0222393	0.0073156	0.00353095	0.00644169	0.032265	0.00353097	0.0145018	0.0420193	0.0146394	0.0129117	0.0222393	0.00635056	0.00622355	0.0590957	0.00657059	0.0205959	0.00124413	0.00644169	0.00259704	0.0436474	0.045403	0.0199945	0.0333919	0.000649823	0.00259704	0.00904591	0.00149933	0.00149933	0.0160604	0.0175041
Candidatus Saccharibacteria	0.00124471	0.000609633	0.0370202	0.00259929	0.0205081	0.0328378	0.00547549	0.0103382	0.0161651	0.000622065	0.0265437	0.000609633	0.000588491	0.00402606	0.0184371	0.000588495	0.00621504	0.0156072	0.0111131	0.0115412	0.0265437	0.0161651	0.00124471	0.0320805	0.00547549	0.0274612	0.000622065	0.00402606	0.000865681	0.0246703	0.0244477	0.00624828	0.00989389	0.00259929	0.000865681	0.0103382	0.004498	0.004498	0.0112524	0.0105857
Ignavibacteriae	0.000622355	0.00426743	0.0235583	0.000649823	0.0243534	0.0481622	0.00547549	0.00646137	0.0023093	0.000622065	0.0315654	0.00426743	0.000588491	0.00322085	0.0138279	0.000588495	0.00414336	0.0204094	0.0108385	0.0131238	0.0315654	0.0023093	0.000622355	0.0388343	0.00547549	0.0274612	0.000622065	0.00322085	0.00173136	0.00759085	0.00873134	0.00124966	0.00371021	0.000649823	0.00173136	0.00646137	0.00199911	0.00199911	0.00810918	0.0113694
Thermodesulfobacteria	0.00124471	0.0018289	0.0269238	0.00324912	0.0358892	0.0306487	0.00547549	0	0.00115465	0.00124413	0.0229567	0.0018289	0.000588491	0.00241563	0.0138279	0	0.00207168	0.0144066	0.00920858	0.0115802	0.0229567	0.00115465	0.00124471	0.0388343	0.00547549	0.0343265	0.00124413	0.00241563	0	0.013284	0.0139701	0.00374897	0.00865715	0.00324912	0	0	0.000999555	0.000999555	0.00847559	0.0116281
Elusimicrobia	0.00311177	0.0036578	0.0134619	0.00324912	0.0320439	0.0306487	0.0021902	0.00387682	0.00115465	0	0.0193697	0.0036578	0.00117698	0	0.0153643	0.00117699	0.00621504	0.0156072	0.0086646	0.0098894	0.0193697	0.00115465	0.00311177	0.0270152	0.0021902	0.0137306	0	0	0.00259704	0.013284	0.0209552	0.00874759	0.00989389	0.00324912	0.00259704	0.00387682	0.00249889	0.00249889	0.00759836	0.00785873
Armatimonadetes	0	0.00243853	0.0134619	0.00129965	0.0192263	0.0175135	0.0032853	0.00258455	0.0023093	0.00124413	0.0165001	0.00243853	0	0.00241563	0.0153643	0	0.00621504	0.024011	0.00723932	0.00775134	0.0165001	0.0023093	0	0.0202614	0.0032853	0.0137306	0.00124413	0.00241563	0.0043284	0.00569314	0.00698507	0.00499863	0.00618368	0.00129965	0.0043284	0.00258455	0.00149933	0.00149933	0.00550815	0.00549476
Chrysiogenetes	0.000622355	0.0036578	0.0168274	0.000649823	0.0192263	0.0218919	0.0021902	0	0.00115465	0.00497652	0.0114783	0.0036578	0	0.00483127	0.0122914	0	0.00207168	0.0132061	0.00659631	0.00704034	0.0114783	0.00115465	0.000622355	0.0101307	0.0021902	0.0137306	0.00497652	0.00483127	0.00173136	0.00569314	0.0122239	0.00124966	0.00618368	0.000649823	0.00173136	0	0.00199911	0.00199911	0.00458754	0.00431253
Calditrichaeota	0.000622355	0.0036578	0.0134619	0.00194947	0.0243534	0.0131351	0.0032853	0.00387682	0.00173197	0	0.0121957	0.0036578	0.00117698	0	0.00921857	0.000588495	0.00414336	0.010805	0.00599222	0.00636681	0.0121957	0.00173197	0.000622355	0.0236383	0.0032853	0.0137306	0.000622065	0	0.00173136	0.00759085	0.0157164	0.00499863	0.00371021	0.00194947	0.00173136	0.00387682	0.000999555	0.000999555	0.00550725	0.00638951
Balneolaeota	0.00186706	0.00243853	0.0168274	0.00194947	0.0217898	0.00218919	0.00438039	0.00258455	0.00173197	0.00311032	0.0114783	0.00243853	0	0.00241563	0.00460929	0	0.00414336	0.0168077	0.00559787	0.00630221	0.0114783	0.00173197	0.00186706	0.0219498	0.00438039	0.0274612	0.00311032	0.00241563	0.00346272	0.00759085	0.00873134	0.0112469	0.00989389	0.00194947	0.00346272	0.00258455	0.00249889	0.00249889	0.00712861	0.00706843
Dictyoglomi	0.00186706	0.000609633	0.0134619	0.000649823	0.0153811	0.0175135	0.0021902	0.00646137	0.000577324	0.00186619	0.0107609	0.000609633	0	0.00161042	0.00307286	0	0	0.00960442	0.00479091	0.00570801	0.0107609	0.000577324	0.00186706	0.0101307	0.0021902	0.0068653	0.00186619	0.00161042	0.000865681	0.00759085	0.00174627	0.00499863	0.00371021	0.000649823	0.000865681	0.00646137	0.000999555	0.000999555	0.00359754	0.00326924
Kiritimatiellaeota	0.000622355	0.000609633	0.00841368	0	0.0140993	0.0109459	0.0021902	0.00129227	0.00115465	0	0.0107609	0.000609633	0.000588491	0	0.0138279	0.000588495	0	0.0144066	0.00445056	0.00556298	0.0107609	0.00115465	0.000622355	0.0135076	0.0021902	0.0068653	0	0	0	0.0151817	0.00873134	0.00624828	0.0111306	0	0	0.00129227	0.000499778	0.000499778	0.00437138	0.0051627
Candidatus Cloacimonetes	0	0	0.0100964	0	0.0166628	0.0109459	0	0.00258455	0.000577324	0	0.00573917	0	0.000588491	0.000805211	0.00153643	0	0.00414336	0.010805	0.00358248	0.00497554	0.00573917	0.000577324	0	0.0135076	0	0.0274612	0	0.000805211	0.000865681	0.00379543	0.00873134	0.00374897	0.00247347	0	0.000865681	0.00258455	0.000499778	0.000499778	0.00400862	0.00666976
Caldiserica	0.00124471	0	0.00841368	0	0.010254	0.0131351	0	0	0.00115465	0.000622065	0.00717396	0	0	0	0.00307286	0.00117699	0	0.0024011	0.00270273	0.00400215	0.00717396	0.00115465	0.00124471	0.00844224	0	0.0068653	0	0	0.00173136	0.00379543	0.00349253	0	0.00123674	0	0.00173136	0	0.000999555	0.000999555	0.0021593	0.00263472
Candidatus Gracilibacteria	0.000622355	0.00243853	0.00336547	0.00129965	0.00640878	0.00875676	0.0010951	0.00258455	0	0.00124413	0.00358698	0.00243853	0	0.000805211	0.00153643	0	0	0.00480221	0.00227693	0.00233445	0.00358698	0	0.000622355	0.00506534	0.0010951	0.0205959	0.00124413	0.000805211	0.00173136	0.00189771	0.0052388	0.00249931	0.00494694	0.00129965	0.00173136	0.00258455	0.00249889	0.00249889	0.00333014	0.0044441
Coprothermobacterota	0	0	0.00336547	0	0.00512702	0.00656757	0	0	0	0	0.00358698	0	0	0	0.00307286	0	0	0.00480221	0.00147345	0.00219895	0.00358698	0	0	0.00844224	0	0.0068653	0	0	0	0	0	0.00124966	0.00123674	0	0	0	0	0	0.00118783	0.0024604
Candidatus Bipolaricaulota	0	0.000609633	0.00336547	0	0.00256351	0.00218919	0	0	0	0	0.00143479	0.000609633	0	0	0.00460929	0	0	0.0024011	0.000987924	0.00139315	0.00143479	0	0	0	0	0.0137306	0	0	0	0.00189771	0	0.00124966	0.00123674	0	0	0	0	0	0.00108608	0.00312737

## Sheet: Kraken_Bacteria_Family
Taxa	TRZ1429	TRZ1464	TRZ1469	TRZ1474	TRZ1480	TRZ505	TRZ511	TRZ531	TRZ562	TRZ577	TRZ578	TRZ674	TRZ677	TRZ679	TRZ689	TRZ718	TRZ728	TRZ721	Lushoto (Mean)	Lushoto (SD)	TMP17787	TMP17871	TMP17852	TMP17811	TMP17800	TMP17921	TMP17909	TMP17891	TMP17788	TMP17926	TMP17982	TMP18001	TMP18016	TMP18023	TMP18027	TMP18032	TMP18046	TMP18060	Rungwe (Mean)	Rungwe (SD)
Pseudomonadaceae	8.05245	3.19075	84.6496	19.3257	43.8354	14.4286	46.9729	2.99656	47.0131	59.5306	50.6019	45.6949	4.88805	1.56778	75.8657	1.63187	46.9729	27.3812	32.4778	26.6968	42.6641	42.6641	50.6019	41.3069	75.8657	10.4461	13.7458	13.2926	5.70004	1.13566	47.0131	43.8354	41.3069	59.5306	27.3812	1.82736	45.6949	2.99656	31.5005	22.4163
Comamonadaceae	8.16757	1.40345	1.99718	5.6323	36.1909	6.70685	32.2504	1.03012	31.9283	13.6038	8.74735	21.3367	0.506598	0.531255	8.82119	0.485654	32.2504	8.56031	12.2306	12.6861	18.5986	18.5986	8.74735	38.6772	8.82119	9.20535	14.0527	10.7278	7.44515	0.339926	31.9283	36.1909	38.6772	13.6038	8.56031	1.24531	21.3367	1.03012	15.9881	12.6841
Moraxellaceae	39.7015	14.6017	0.0272855	14.4616	0.413056	25.2666	0.289204	0.672583	0	1.081	2.42532	1.38125	0.578263	0.620759	0.0975487	10.1578	0.289204	0.129121	6.23299	10.9848	11.1474	11.1474	2.42532	0.276953	0.0975487	29.9992	25.3573	11.7087	29.8564	1.41378	0.957445	0.413056	0.276953	1.081	0.129121	0.990061	1.38125	0.672583	7.18509	10.584
Enterobacteriaceae	1.70344	17.377	0.12575	8.22574	0.633521	5.40065	0.501797	11.0732	0.581887	1.00901	0.768805	0.525921	9.54876	14.1692	0.240886	15.2209	0.501797	0.888503	4.91648	6.02361	0.880194	0.880194	0.768805	0.60294	0.240886	4.79869	3.75736	8.87651	6.82489	15.3971	0.581887	0.633521	0.60294	1.00901	0.888503	1.43288	0.525921	11.0732	3.32086	4.41588
Oxalobacteraceae	0.938066	0.295464	0.0866017	0.350203	1.90394	0.602719	2.19361	0.568369	2.01838	1.80028	4.66552	14.677	0.410221	0.382561	5.56227	0.334934	2.19361	47.1526	4.78535	11.1199	6.2986	6.2986	4.66552	2.91845	5.56227	0.495523	0.386271	0.411189	0.414838	0.224042	2.01838	1.90394	2.91845	1.80028	47.1526	0.365472	14.677	0.568369	5.50443	10.9938
Flavobacteriaceae	8.49376	3.13271	0.130496	1.5396	0.44262	4.52314	1.48879	3.95694	1.33105	1.04411	3.54001	1.09501	5.04868	4.06958	0.820869	3.43493	1.48879	2.94356	2.69581	2.08718	0.539673	0.539673	3.54001	1.16139	0.820869	2.79201	3.32947	1.97481	1.68927	4.02503	1.33105	0.44262	1.16139	1.04411	2.94356	5.68125	1.09501	3.95694	2.1149	1.50813
Prevotellaceae	3.2875	2.47979	0.0747384	13.3029	0.0287196	8.96384	0.123853	2.92682	0.0123667	0.085076	0.128359	0.260121	3.12608	3.45171	0.0497697	2.04868	0.123853	0.0600858	2.2519	3.57754	0.224434	0.224434	0.128359	0.0290574	0.0497697	8.30616	4.33092	10.7831	12.1221	2.78894	0.0123667	0.0287196	0.0290574	0.085076	0.0600858	3.32405	0.260121	2.92682	2.53964	3.92928
Bacteroidaceae	0.545784	5.10071	0.0990581	2.05926	0.0827801	1.40329	0.317933	5.4945	0.0787566	0.373026	0.474254	0.388477	5.99021	6.40393	0.1586	4.04339	0.317933	0.634736	1.88703	2.33928	0.481888	0.481888	0.474254	0.0726434	0.1586	1.46458	0.97023	1.93056	2.02034	5.48517	0.0787566	0.0827801	0.0726434	0.373026	0.634736	6.1028	0.388477	5.4945	1.4871	2.02978
Xanthomonadaceae	3.67338	0.433963	0.428263	0.903751	0.794013	2.09211	1.61201	1.32432	1.09283	7.16245	4.82361	1.53574	0.472001	0.424426	1.40948	0.431692	1.61201	0.428271	1.70302	1.80385	7.0271	7.0271	4.82361	3.33978	1.40948	2.11277	2.75072	1.07868	1.32429	0.347651	1.09283	0.794013	3.33978	7.16245	0.428271	0.500831	1.53574	1.32432	2.63441	2.35323
Bacillaceae	0.556444	2.65786	0.120412	0.845652	0.576926	0.719965	0.203017	3.86635	0.128874	0.179076	0.339139	0.287382	3.46217	4.33232	0.180498	5.95624	0.203017	0.236508	1.38066	1.81887	0.248683	0.248683	0.339139	0.0926203	0.180498	0.848729	0.52023	0.798407	0.789789	6.27318	0.128874	0.576926	0.0926203	0.179076	0.236508	4.29671	0.287382	3.86635	1.11136	1.77552
Ruminococcaceae	0.183349	4.01646	0.0729589	0.574527	0.116568	0.404866	0.146198	4.24874	0.0266861	0.0630633	0.125657	0.210141	4.90782	4.85058	0.0736592	4.30762	0.146198	0.0888503	1.36466	1.99263	0.158394	0.158394	0.125657	0.0272413	0.0736592	0.46706	0.377167	0.614017	0.624252	4.04048	0.0266861	0.116568	0.0272413	0.0630633	0.0888503	5.28484	0.210141	4.24874	0.92958	1.68074
Lachnospiraceae	0.381622	3.56403	0.176762	1.63805	0.229757	1.09369	0.174927	3.57455	0.043609	0.14338	0.193215	0.463447	4.41111	4.25292	0.310563	3.42377	0.174927	0.289562	1.36333	1.64346	0.297697	0.297697	0.193215	0.0935284	0.310563	0.855198	0.569652	1.47327	1.04707	4.69716	0.043609	0.229757	0.0935284	0.14338	0.289562	5.48207	0.463447	3.57455	1.11972	1.66894
Clostridiaceae	0.324059	2.37558	0.234299	0.863405	0.505127	0.630198	0.214509	3.39658	0.0787566	0.199304	0.378322	0.538416	4.89053	3.6798	0.462527	3.66566	0.214509	0.446169	1.28321	1.55257	1.48023	1.48023	0.378322	0.155275	0.462527	0.738757	0.455202	0.980953	0.775828	6.57447	0.0787566	0.505127	0.155275	0.199304	0.446169	4.33925	0.538416	3.39658	1.28559	1.74448
Burkholderiaceae	0.669438	0.778231	0.244976	0.931186	1.64378	0.817059	1.50348	0.949953	1.68838	1.03579	1.14037	1.1677	0.995898	1.15346	0.637716	0.816866	1.50348	1.30591	1.05465	0.378993	0.955005	0.955005	1.14037	1.75615	0.637716	0.910832	0.922108	1.0584	0.909454	0.471261	1.68838	1.64378	1.75615	1.03579	1.30591	1.07708	1.1677	0.949953	1.13006	0.369341
Caulobacteraceae	2.02963	0.139818	0.0409282	0.24369	0.39954	1.01125	0.234938	3.989	2.96021	2.42853	0.322925	0.173793	0.185341	0.180453	0.263448	0.152581	0.234938	0.781115	0.876229	1.16694	0.491175	0.491175	0.322925	0.236999	0.263448	0.344149	0.463005	0.200985	0.245313	0.100433	2.96021	0.39954	0.236999	2.42853	0.781115	0.199172	0.173793	3.989	0.795998	1.11723
Planococcaceae	0.253704	1.80972	0.0160154	0.316313	0.19428	0.289452	0.0446893	2.53321	0.0221299	0.0297469	0.0648552	0.0352129	1.50991	3.03883	0.0371614	3.97268	0.0446893	0.0319605	0.791364	1.23706	0.0459187	0.0459187	0.0648552	0.00998847	0.0371614	0.320861	0.301734	0.164107	0.189469	5.77101	0.0221299	0.19428	0.00998847	0.0297469	0.0319605	1.37874	0.0352129	2.53321	0.621461	1.43443
Paenibacillaceae	0.155634	1.91656	0.0972786	0.545478	0.169784	0.377386	0.134068	2.16686	0.120413	0.123152	0.244558	0.193103	2.41437	2.40797	0.0988759	2.50084	0.134068	0.241622	0.780112	0.971026	0.134144	0.134144	0.244558	0.110781	0.0988759	0.393314	0.273121	0.523666	0.544475	2.28677	0.120413	0.169784	0.110781	0.123152	0.241622	1.93951	0.193103	2.16686	0.544949	0.744593
Rikenellaceae	0.253704	2.57212	0.0308444	0.852108	0.0253408	0.593559	0.107893	2.29993	0.0169229	0.0422405	0.0635041	0.116998	2.29575	2.58553	0.0716684	1.60396	0.107893	0.0230116	0.759055	1.00749	0.249199	0.249199	0.0635041	0.0136206	0.0716684	0.65466	0.512427	0.890602	0.919426	2.30222	0.0169229	0.0253408	0.0136206	0.0422405	0.0230116	3.37433	0.116998	2.29993	0.657718	0.990237
Alcaligenaceae	0.44345	0.352182	0.24379	0.40346	1.4326	0.419521	1.29727	0.529088	1.47229	0.939406	0.697194	0.979145	0.380566	0.37823	0.526232	0.388895	1.29727	1.11862	0.738845	0.423793	0.820345	0.820345	0.697194	1.50009	0.526232	0.450241	0.629479	0.49232	0.436777	0.293572	1.47229	1.4326	1.50009	0.939406	1.11862	0.514367	0.979145	0.529088	0.841789	0.407995
Sphingobacteriaceae	2.23857	0.630499	0.0302513	0.258214	0.170628	1.10834	0.56947	0.801648	0.700348	0.443823	0.625583	0.516834	0.822913	0.701602	0.292646	0.623349	0.56947	1.44589	0.697227	0.506139	0.171292	0.171292	0.625583	0.71917	0.292646	0.376494	0.492918	0.352184	0.345034	0.757108	0.700348	0.170628	0.71917	0.443823	1.44589	0.935917	0.516834	0.801648	0.557666	0.322321
Aeromonadaceae	3.66059	0.222917	0.0207607	2.31909	0.149511	2.88902	0.113	0.250916	0.129525	0.0702026	1.48491	0.0908719	0.28666	0.297387	0.0842767	0.236314	0.113	0.0588074	0.693209	1.11429	0.085646	0.085646	1.48491	0.115321	0.0842767	3.31212	7.18048	5.98344	2.61268	0.19314	0.129525	0.149511	0.115321	0.0702026	0.0588074	0.330665	0.0908719	0.250916	1.24075	2.16884
Hafniaceae	0.0298476	0.0817802	8.96505	0.106513	0.821043	0.0732789	0.027452	0.0713467	0.0286387	0.843026	0.0580995	0.106775	0.0840212	0.0866176	0.0132719	0.0688475	0.027452	0.00894895	0.639001	2.09303	0.0247651	0.0247651	0.0580995	0.0272413	0.0132719	0.0465766	0.076734	0.136448	0.115676	0.0231768	0.0286387	0.821043	0.0272413	0.843026	0.00894895	0.0773485	0.106775	0.0713467	0.140618	0.254271
Acholeplasmataceae	0.0255836	0.0672708	0.119819	0.0919889	1.80258	0.064119	2.36917	0.117842	0.61378	1.63132	1.57544	0.0136308	0.140859	0.13137	0.0517605	0.10048	2.36917	0.0217332	0.628218	0.874067	0.297181	0.297181	1.57544	0.144379	0.0517605	0.191482	0.0702311	0.0774436	0.0737934	0.231768	0.61378	1.80258	0.144379	1.63132	0.0217332	0.212708	0.0136308	0.117842	0.420479	0.592816
Shewanellaceae	1.16192	0.211046	0.12753	0.524498	0.505127	0.796908	0.134068	0.256527	0.127573	0.255823	4.37503	1.31537	0.257006	0.256965	0.0577329	0.195378	0.134068	0.219888	0.606248	1.00695	0.0763591	0.0763591	4.37503	0.117137	0.0577329	0.908244	2.74812	0.424096	0.339051	0.224042	0.127573	0.505127	0.117137	0.255823	0.219888	0.404146	1.31537	0.256527	0.697098	1.12467
Streptomycetaceae	0.490353	1.00642	0.084229	1.18456	0.292264	0.88301	0.300695	1.15998	0.356032	0.282595	0.310765	0.231723	1.16147	1.29638	0.1586	1.05504	0.300695	0.338142	0.605164	0.42718	0.204828	0.204828	0.310765	0.232459	0.1586	1.03892	0.779045	1.38108	1.26845	0.633498	0.356032	0.292264	0.232459	0.282595	0.338142	1.36327	0.231723	1.15998	0.581607	0.453286
Oscillospiraceae	0.0596951	1.52744	0.0266923	0.214641	0.0287196	0.14839	0.039582	1.73316	0.00390528	0.0208228	0.0324276	0.0658821	2.02886	2.03407	0.0265439	1.8012	0.039582	0.0204547	0.547338	0.823402	0.051594	0.051594	0.0324276	0.0154367	0.0265439	0.142317	0.137861	0.21758	0.189469	1.60692	0.00390528	0.0287196	0.0154367	0.0208228	0.0204547	1.94338	0.0658821	1.73316	0.350195	0.65491
Rhodobacteraceae	0.385886	0.622585	0.0450803	0.509974	0.258477	0.456161	0.288565	1.15758	0.305263	0.235595	0.412101	0.197646	0.800672	0.795438	0.104185	0.710803	0.288565	0.200073	0.431925	0.287943	0.169228	0.169228	0.412101	0.328711	0.104185	0.47741	0.452601	0.529198	0.492621	0.733931	0.305263	0.258477	0.328711	0.235595	0.200073	0.875972	0.197646	1.15758	0.412696	0.274868
Yersiniaceae	0.268628	0.258531	0.177355	0.405074	0.435862	0.346243	0.28282	0.606046	0.288991	0.220127	0.851225	0.715616	0.370682	0.317598	0.256812	0.344237	0.28282	0.0920463	0.362262	0.189321	0.334329	0.334329	0.851225	0.55209	0.256812	0.310511	0.358959	0.625081	0.552453	0.363103	0.288991	0.435862	0.55209	0.220127	0.0920463	0.400278	0.715616	0.606046	0.436108	0.191488
Rhizobiaceae	0.298476	0.47881	0.0462666	0.367956	0.179075	0.337083	0.183226	1.10066	0.291595	0.18919	0.22294	0.170385	0.672169	0.599105	0.0736592	0.474489	0.183226	0.183453	0.336209	0.256679	0.12331	0.12331	0.22294	0.216114	0.0736592	0.344149	0.239306	0.400125	0.378939	0.363103	0.291595	0.179075	0.216114	0.18919	0.183453	0.773485	0.170385	1.10066	0.310495	0.252071
Muribaculaceae	0.14071	0.87452	0.0100838	0.598735	0.00929164	0.401202	0.047243	0.908267	0.00976321	0.0297469	0.044588	0.0636103	0.946474	1.09716	0.0245531	0.645677	0.047243	0.0140626	0.328496	0.399672	0.0892576	0.0892576	0.044588	0.00544826	0.0245531	0.412721	0.251011	0.60111	0.56442	0.757108	0.00976321	0.00929164	0.00544826	0.0297469	0.0140626	0.995862	0.0636103	0.908267	0.270863	0.34355
Sphingomonadaceae	0.296344	0.400987	0.0332171	0.456717	0.1512	0.386546	0.172373	0.903458	0.27337	0.297469	0.444529	0.140851	0.467059	0.496607	0.0922399	0.429831	0.172373	0.205826	0.323389	0.203622	0.123826	0.123826	0.444529	0.235183	0.0922399	0.366144	0.309537	0.464662	0.500598	0.247219	0.27337	0.1512	0.235183	0.297469	0.205826	0.607186	0.140851	0.903458	0.317906	0.205647
Streptococcaceae	0.132182	0.69777	0.0338102	0.272739	0.116568	0.212509	0.074695	0.830508	0.0292896	0.0458102	0.291849	0.0954155	0.926704	0.957124	0.0643689	0.7015	0.074695	0.104831	0.314576	0.337606	0.124342	0.124342	0.291849	0.104425	0.0643689	0.24194	0.245809	0.413033	0.327084	0.965698	0.0292896	0.116568	0.104425	0.0458102	0.104831	1.19503	0.0954155	0.830508	0.301376	0.342203
Microbacteriaceae	0.547916	0.522338	0.0201675	0.437351	0.110655	0.48364	0.0970397	0.804855	0.130176	0.0856709	0.110794	0.112454	0.6524	0.659737	0.0391522	0.519147	0.0970397	0.0779837	0.306029	0.263345	0.0804866	0.0804866	0.110794	0.0735514	0.0391522	0.410133	0.319942	0.449911	0.420822	0.394005	0.130176	0.110655	0.0735514	0.0856709	0.0779837	0.541439	0.112454	0.804855	0.239782	0.217499
Chromatiaceae	2.81633	0.0883753	0.00830427	0.0790782	0.0354772	1.2549	0.0331978	0.103413	0.0390528	0.027962	0.260772	0.0193103	0.093906	0.109716	0.00995395	0.0948978	0.0331978	0.0210939	0.284941	0.693432	0.0232173	0.0232173	0.260772	0.0399539	0.00995395	0.161724	1.1289	0.160419	0.0917431	0.123609	0.0390528	0.0354772	0.0399539	0.027962	0.0210939	0.112155	0.0193103	0.103413	0.134552	0.257151
Erwiniaceae	0.409338	0.199174	0.021947	1.61061	0.114034	1.09002	0.113639	0.210833	0.0898215	0.0696076	0.18781	0.105639	0.24465	0.219431	0.0530877	0.204682	0.113639	0.0415487	0.283306	0.408892	0.0975127	0.0975127	0.18781	0.135298	0.0530877	0.587383	0.465606	0.787343	1.23853	0.247219	0.0898215	0.114034	0.135298	0.0696076	0.0415487	0.365472	0.105639	0.210833	0.27942	0.314547
Lactobacillaceae	0.0938066	0.580375	0.0308444	0.290491	0.0599733	0.205181	0.0651187	0.728698	0.0175738	0.0458102	0.0770156	0.0692898	0.825384	0.822867	0.0464517	0.75174	0.0651187	0.0530545	0.268266	0.312706	0.200185	0.200185	0.0770156	0.0544826	0.0464517	0.213476	0.15867	0.28396	0.217391	0.98115	0.0175738	0.0599733	0.0544826	0.0458102	0.0530545	1.07321	0.0692898	0.728698	0.251948	0.326233
Hymenobacteraceae	0.219593	0.481448	0.0154222	0.543864	0.0557498	0.403034	0.0683108	0.568369	0.0898215	0.056519	0.144573	0.0488437	0.657342	0.630865	0.0391522	0.461464	0.0683108	0.0441055	0.255377	0.240234	0.0557215	0.0557215	0.144573	0.0789997	0.0391522	0.363556	0.323843	0.531042	0.608297	0.540791	0.0898215	0.0557498	0.0789997	0.056519	0.0441055	0.707739	0.0488437	0.568369	0.243991	0.241774
Vibrionaceae	0.215329	0.452429	0.0284718	0.230779	0.146977	0.223501	0.143644	0.537906	0.113904	0.0803165	0.449933	0.109046	0.61286	0.498051	0.0564057	0.461464	0.143644	0.0543329	0.253277	0.192368	0.112475	0.112475	0.449933	0.135298	0.0564057	0.213476	0.258815	0.236019	0.229358	0.548517	0.113904	0.146977	0.135298	0.0803165	0.0543329	0.69807	0.109046	0.537906	0.234923	0.19226
Porphyromonadaceae	0.0810148	0.621265	0.0154222	0.313085	0.0177386	0.212509	0.0510735	0.640517	0.0117159	0.110658	0.141871	0.0465719	0.79573	0.805544	0.0291982	0.517286	0.0510735	0.0287645	0.249502	0.288735	0.043339	0.043339	0.141871	0.0118046	0.0291982	0.236764	0.149566	0.318994	0.273235	0.52534	0.0117159	0.0177386	0.0118046	0.110658	0.0287645	0.875972	0.0465719	0.640517	0.1954	0.249925
Campylobacteraceae	0.138578	0.275678	0.0207607	0.724614	0.071799	0.470817	0.067034	0.504237	0.0397037	0.108279	0.208077	0.0795129	0.61286	0.537029	0.0517605	0.396338	0.067034	0.0613642	0.246415	0.23114	0.085646	0.085646	0.208077	0.110781	0.0517605	1.40636	0.487716	0.933011	0.30714	0.571693	0.0397037	0.071799	0.110781	0.108279	0.0613642	0.91658	0.0795129	0.504237	0.341116	0.392654
Bradyrhizobiaceae	0.142842	0.333716	0.0409282	0.274353	0.175696	0.218005	0.185141	0.672583	0.233015	0.174317	0.178352	0.154482	0.345969	0.379674	0.0763136	0.32563	0.185141	0.20263	0.238822	0.141111	0.117634	0.117634	0.178352	0.177068	0.0763136	0.25229	0.193786	0.341121	0.299162	0.247219	0.233015	0.175696	0.177068	0.174317	0.20263	0.421549	0.154482	0.672583	0.233996	0.13745
Enterococcaceae	0.0383754	0.276997	0.0349966	0.13879	0.0489923	0.0952625	0.027452	0.590013	0.038402	0.0345064	0.0553972	0.0363488	0.835269	0.67273	0.0497697	1.17785	0.027452	0.0939639	0.237365	0.343131	0.0923533	0.0923533	0.0553972	0.0136206	0.0497697	0.141024	0.0897398	0.130917	0.157559	0.471261	0.038402	0.0489923	0.0136206	0.0345064	0.0939639	0.483428	0.0363488	0.590013	0.146293	0.17603
Corynebacteriaceae	0.117258	0.472215	0.025506	0.263056	0.0937611	0.199685	0.0766103	0.549931	0.0702951	0.0428355	0.071611	0.0726975	0.598033	0.627977	0.0391522	0.539615	0.0766103	0.0421879	0.221058	0.224067	0.0737794	0.0737794	0.071611	0.0780917	0.0391522	0.201832	0.163873	0.265521	0.241324	0.440358	0.0702951	0.0937611	0.0780917	0.0428355	0.0421879	0.690335	0.0726975	0.549931	0.182748	0.191045
Staphylococcaceae	0.0959386	0.365373	0.0260991	0.237235	0.0684203	0.175869	0.0510735	0.582798	0.0279879	0.0356962	0.0770156	0.0795129	0.679583	0.643857	0.0477789	0.656842	0.0510735	0.0473016	0.219414	0.247367	0.0624287	0.0624287	0.0770156	0.0299654	0.0477789	0.195363	0.13656	0.232331	0.279218	0.818912	0.0279879	0.0684203	0.0299654	0.0356962	0.0473016	0.845032	0.0795129	0.582798	0.203262	0.265965
Tannerellaceae	0.100203	0.484086	0.0130496	0.3615	0.00591286	0.249148	0.039582	0.561955	0.027337	0.127317	0.108092	0.0306693	0.627687	0.642414	0.0205715	0.414945	0.039582	0.0268468	0.215605	0.233782	0.043339	0.043339	0.108092	0.00272413	0.0205715	0.258759	0.166474	0.333745	0.37495	0.59487	0.027337	0.00591286	0.00272413	0.127317	0.0268468	0.719341	0.0306693	0.561955	0.191609	0.231038
Micrococcaceae	0.153502	0.316568	0.0148291	0.279194	0.201882	0.225333	0.160243	0.448923	0.200471	0.0826963	0.139169	0.0761052	0.395394	0.412877	0.0491061	0.379591	0.160243	0.0651995	0.208963	0.135067	0.0877098	0.0877098	0.139169	0.0681032	0.0491061	0.265228	0.2263	0.256302	0.209414	0.26267	0.200471	0.201882	0.0681032	0.0826963	0.0651995	0.462157	0.0761052	0.448923	0.180958	0.126039
Morganellaceae	0.0959386	0.153008	0.00830427	0.62617	0.0430794	0.397538	0.0517119	0.194801	0.957445	0.0398608	0.194566	0.0397565	0.212524	0.223762	0.0159263	0.208403	0.0517119	0.0313213	0.19699	0.2458	0.0706838	0.0706838	0.194566	0.0553906	0.0159263	0.666304	0.231503	0.542105	0.498604	0.139061	0.0318932	0.0430794	0.0553906	0.0398608	0.0313213	0.303593	0.0397565	0.194801	0.17914	0.198985
Peptococcaceae	0.0532992	0.436601	0.0130496	0.148473	0.0337878	0.108086	0.0344746	0.466559	0.0208282	0.0339114	0.0662064	0.0590667	0.662284	0.561571	0.0557421	0.535894	0.0344746	0.0632818	0.188199	0.226059	0.0392114	0.0392114	0.0662064	0.021793	0.0557421	0.0776277	0.0624277	0.165951	0.101715	0.3322	0.0208282	0.0337878	0.021793	0.0339114	0.0632818	0.647794	0.0590667	0.466559	0.128284	0.175062
Rhodospirillaceae	0.10873	0.288869	0.0189812	0.295333	0.112344	0.214341	0.125768	0.428882	0.157513	0.114823	0.11755	0.089736	0.380566	0.303162	0.0643689	0.269808	0.125768	0.108027	0.184698	0.115849	0.086162	0.086162	0.11755	0.106241	0.0643689	0.203126	0.201589	0.256302	0.293179	0.285847	0.157513	0.112344	0.106241	0.114823	0.108027	0.402212	0.089736	0.428882	0.178906	0.111291
Eubacteriaceae	0.0575632	0.469576	0.0142359	0.193661	0.0219621	0.135566	0.0178757	0.484997	0.0032544	0.00951899	0.027023	0.0431642	0.580734	0.555796	0.0305254	0.485654	0.0178757	0.0281253	0.176506	0.222539	0.0381796	0.0381796	0.027023	0.0108965	0.0305254	0.119029	0.0702311	0.164107	0.145592	0.579419	0.0032544	0.0219621	0.0108965	0.00951899	0.0281253	0.719341	0.0431642	0.484997	0.141358	0.217473
Phyllobacteriaceae	0.125786	0.225555	0.0148291	0.204958	0.103053	0.170373	0.0964012	0.692624	0.143845	0.104709	0.128359	0.0954155	0.289132	0.254078	0.0384886	0.236314	0.0964012	0.0997168	0.173335	0.149259	0.0583012	0.0583012	0.128359	0.103517	0.0384886	0.164312	0.15737	0.210204	0.199442	0.123609	0.143845	0.103053	0.103517	0.104709	0.0997168	0.342267	0.0954155	0.692624	0.162614	0.149393
Mycobacteriaceae	0.13005	0.283593	0.0177949	0.317927	0.0760225	0.236324	0.0855481	0.381585	0.0911233	0.0826963	0.101336	0.0431642	0.365739	0.333478	0.0457882	0.290276	0.0855481	0.085015	0.169612	0.1257	0.0505621	0.0505621	0.101336	0.0771836	0.0457882	0.222533	0.201589	0.311618	0.247308	0.270396	0.0911233	0.0760225	0.0771836	0.0826963	0.085015	0.413814	0.0431642	0.381585	0.157193	0.121998
Nocardiaceae	0.0916747	0.258531	0.0278786	0.230779	0.164715	0.170373	0.0964012	0.411246	0.136034	0.0779368	0.108092	0.0772411	0.336085	0.32626	0.0371614	0.279111	0.0964012	0.0946031	0.167807	0.112758	0.0583012	0.0583012	0.108092	0.0526665	0.0371614	0.182425	0.154769	0.234175	0.267252	0.169963	0.136034	0.164715	0.0526665	0.0779368	0.0946031	0.297792	0.0772411	0.411246	0.146408	0.101861
Eggerthellaceae	0.066091	0.422091	0.0106769	0.211413	0.0152045	0.14839	0.0248983	0.426477	0.00976321	0.0118987	0.0148627	0.0170385	0.573321	0.560127	0.0112811	0.448439	0.0248983	0.0204547	0.167629	0.213066	0.0201217	0.0201217	0.0148627	0.0199769	0.0112811	0.157843	0.107948	0.278428	0.241324	0.409456	0.00976321	0.0152045	0.0199769	0.0118987	0.0204547	0.647794	0.0170385	0.426477	0.136109	0.189608
Alteromonadaceae	0.13005	0.295464	0.0136427	0.129107	0.101363	0.13007	0.102785	0.303023	0.0885198	0.0678228	0.412101	0.0738334	0.348441	0.2945	0.0404794	0.271668	0.102785	0.0421879	0.163769	0.121637	0.0732635	0.0732635	0.412101	0.115321	0.0404794	0.121617	0.174277	0.197297	0.17152	0.309023	0.0885198	0.101363	0.115321	0.0678228	0.0421879	0.417682	0.0738334	0.303023	0.160995	0.120654
Cytophagaceae	0.110862	0.308654	0.0136427	0.208185	0.0270302	0.166709	0.0906555	0.358337	0.0644372	0.0737722	0.12971	0.0443001	0.412692	0.384005	0.037825	0.286554	0.0906555	0.0536937	0.158985	0.133298	0.0376636	0.0376636	0.12971	0.106241	0.037825	0.159137	0.132659	0.234175	0.193458	0.401731	0.0644372	0.0270302	0.106241	0.0737722	0.0536937	0.502765	0.0443001	0.358337	0.150047	0.139608
Desulfovibrionaceae	0.0746189	0.344268	0.0154222	0.217868	0.0532158	0.155718	0.047243	0.383989	0.0540231	0.0315317	0.0418857	0.0420283	0.472001	0.427313	0.0192443	0.357262	0.047243	0.0351566	0.156669	0.162884	0.0386955	0.0386955	0.0418857	0.0508504	0.0192443	0.159137	0.169075	0.234175	0.245313	0.355377	0.0540231	0.0532158	0.0508504	0.0315317	0.0351566	0.715474	0.0420283	0.383989	0.15104	0.18214
Pseudonocardiaceae	0.11939	0.269083	0.018388	0.274353	0.0658862	0.207013	0.0619266	0.347114	0.0898215	0.0719874	0.071611	0.0681539	0.30643	0.327703	0.0404794	0.295858	0.0619266	0.116976	0.156339	0.115002	0.0505621	0.0505621	0.071611	0.0472182	0.0404794	0.269109	0.239306	0.27474	0.305146	0.200865	0.0898215	0.0658862	0.0472182	0.0719874	0.116976	0.3384	0.0681539	0.347114	0.149731	0.114363
Hyphomicrobiaceae	0.0596951	0.0857373	0.00830427	0.100058	0.04139	0.0824387	0.0402204	1.4109	0.133431	0.094595	0.114848	0.0590667	0.145801	0.109716	0.027871	0.10048	0.0402204	0.102274	0.153169	0.316148	0.0319883	0.0319883	0.114848	0.0735514	0.027871	0.063396	0.0546242	0.0866631	0.0737934	0.092707	0.133431	0.04139	0.0735514	0.094595	0.102274	0.11989	0.0590667	1.4109	0.149252	0.316399
Spirochaetaceae	0.0511673	0.296783	0.00949059	0.229165	0.0329431	0.152054	0.0261752	0.35032	0.00585793	0.0172532	0.0891759	0.0397565	0.553551	0.422983	0.0185807	0.338655	0.0261752	0.0198155	0.148883	0.172053	0.0237332	0.0237332	0.0891759	0.00998847	0.0185807	0.165606	0.123555	0.267365	0.20343	0.502163	0.00585793	0.0329431	0.00998847	0.0172532	0.0198155	0.736744	0.0397565	0.35032	0.146667	0.202783
Halomonadaceae	0.0980706	0.197855	0.0231333	0.158156	0.174852	0.131902	0.1213	0.206825	0.14775	0.0898355	0.306711	0.0908719	0.165571	0.258409	0.0517605	0.230732	0.1213	0.0837366	0.14771	0.0732078	0.0908054	0.0908054	0.306711	0.0998847	0.0517605	0.143611	0.133959	0.17517	0.137615	0.19314	0.14775	0.174852	0.0998847	0.0898355	0.0837366	0.280388	0.0908719	0.206825	0.144311	0.0690114
Micromonosporaceae	0.110862	0.253255	0.0243196	0.275967	0.0625074	0.205181	0.0836329	0.299015	0.0911233	0.0684178	0.0851225	0.0715616	0.276776	0.275733	0.031189	0.230732	0.0836329	0.085015	0.145225	0.0977337	0.0490143	0.0490143	0.0851225	0.0608388	0.031189	0.229002	0.171676	0.276584	0.25728	0.19314	0.0911233	0.0625074	0.0608388	0.0684178	0.085015	0.291991	0.0715616	0.299015	0.135185	0.0961904
Bifidobacteriaceae	0.0469033	0.357458	0.00889743	0.175909	0.0354772	0.12091	0.0306441	0.367957	0.0195264	0.0208228	0.0297253	0.0352129	0.467059	0.44175	0.0126083	0.368427	0.0306441	0.0153411	0.143626	0.170672	0.0959648	0.0959648	0.0297253	0.0118046	0.0126083	0.134555	0.101445	0.193609	0.173514	0.254944	0.0195264	0.0354772	0.0118046	0.0208228	0.0153411	0.437019	0.0352129	0.367957	0.113739	0.127831
Pectobacteriaceae	0.189745	0.176751	0.0344034	0.179136	0.147822	0.183197	0.128322	0.174759	0.104792	0.0731773	0.148627	0.124949	0.24465	0.177566	0.0497697	0.186074	0.128322	0.0773445	0.140523	0.0555557	0.107316	0.107316	0.148627	0.124402	0.0497697	0.200538	0.166474	0.189921	0.123654	0.185414	0.104792	0.147822	0.124402	0.0731773	0.0773445	0.262985	0.124949	0.174759	0.138537	0.0521535
Chromobacteriaceae	0.0788828	0.133223	0.0260991	0.0952166	0.241583	0.0879346	0.173011	0.143495	0.233015	0.112443	0.147275	0.151075	0.18287	0.177566	0.0862675	0.145138	0.173011	0.108666	0.13871	0.0546018	0.148591	0.148591	0.147275	0.178884	0.0862675	0.10221	0.131358	0.13276	0.147587	0.100433	0.233015	0.241583	0.178884	0.112443	0.108666	0.1721	0.151075	0.143495	0.148068	0.0420055
Hungateiclostridiaceae	0.0149238	0.331078	0.0142359	0.0758505	0.0177386	0.0494632	0.0178757	0.415254	0.00390528	0.0130886	0.0297253	0.0431642	0.518954	0.480728	0.0205715	0.377731	0.0178757	0.0281253	0.137238	0.187844	0.0268289	0.0268289	0.0297253	0.0118046	0.0205715	0.0828029	0.0442196	0.103258	0.0638213	0.370828	0.00390528	0.0177386	0.0118046	0.0130886	0.0281253	0.566578	0.0431642	0.415254	0.104464	0.165255
Chitinophagaceae	0.0810148	0.270402	0.0106769	0.166226	0.0236514	0.13007	0.0485198	0.326271	0.0533722	0.057114	0.114848	0.0431642	0.40775	0.355132	0.0265439	0.256782	0.0485198	0.0492192	0.137182	0.128322	0.0232173	0.0232173	0.114848	0.0553906	0.0265439	0.141024	0.115751	0.188077	0.20343	0.347651	0.0533722	0.0236514	0.0553906	0.057114	0.0492192	0.462157	0.0431642	0.326271	0.128305	0.129862
Mycoplasmataceae	0.0575632	0.156965	0.0100838	0.229165	0.0380113	0.155718	0.0529888	0.321461	0.0130176	0.0303418	0.0594506	0.0522514	0.439875	0.311823	0.027871	0.266086	0.0529888	0.0511368	0.129267	0.129867	0.059849	0.059849	0.0594506	0.0190689	0.027871	0.197951	0.100144	0.254458	0.159553	0.509889	0.0130176	0.0380113	0.0190689	0.0303418	0.0511368	0.657462	0.0522514	0.321461	0.146157	0.183201
Fusobacteriaceae	0.0788828	0.183346	0.0154222	0.148473	0.0473029	0.119078	0.0536272	0.290998	0.0117159	0.0160633	0.0513437	0.0681539	0.457174	0.304605	0.0418066	0.320048	0.0536272	0.0389918	0.127814	0.130627	0.0459187	0.0459187	0.0513437	0.0172528	0.0418066	0.128086	0.0871386	0.160419	0.107698	0.486712	0.0117159	0.0473029	0.0172528	0.0160633	0.0389918	0.574313	0.0681539	0.290998	0.124283	0.163185
Atopobiaceae	0.0511673	0.31393	0.00593162	0.187205	0.00760225	0.128238	0.00766103	0.335891	0.00130176	0.00654431	0.00945805	0.0238539	0.392922	0.422983	0.00597237	0.314465	0.00766103	0.00830974	0.12395	0.157583	0.0159941	0.0159941	0.00945805	0.00363217	0.00597237	0.126792	0.085838	0.167795	0.195453	0.224042	0.00130176	0.00760225	0.00363217	0.00654431	0.00830974	0.419616	0.0238539	0.335891	0.0920956	0.127794
Peptostreptococcaceae	0.0319795	0.209727	0.0177949	0.0919889	0.0422347	0.065951	0.0268136	0.308635	0.00650881	0.0166582	0.0378322	0.0567949	0.439875	0.388335	0.0305254	0.295858	0.0268136	0.0287645	0.117949	0.142408	0.0407593	0.0407593	0.0378322	0.0108965	0.0305254	0.0685711	0.0416184	0.0866631	0.0578381	0.502163	0.00650881	0.0422347	0.0108965	0.0166582	0.0287645	0.444754	0.0567949	0.308635	0.101826	0.151068
Neisseriaceae	0.070355	0.142456	0.00949059	0.142018	0.144443	0.11175	0.130876	0.178768	0.124969	0.0606836	0.0851225	0.0965514	0.212524	0.176122	0.037825	0.232593	0.130876	0.0300429	0.117637	0.0615788	0.0851301	0.0851301	0.0851225	0.169804	0.037825	0.122911	0.0988438	0.121697	0.081771	0.154512	0.124969	0.144443	0.169804	0.0606836	0.0300429	0.237847	0.0965514	0.178768	0.115881	0.0532983
Acetobacteraceae	0.0532992	0.209727	0.0136427	0.156543	0.0430794	0.11175	0.0689492	0.264544	0.0592301	0.0398608	0.0648552	0.0545231	0.269362	0.267071	0.0285346	0.213985	0.0689492	0.0498584	0.113209	0.0907188	0.0381796	0.0381796	0.0648552	0.0681032	0.0285346	0.116442	0.0923409	0.130917	0.143598	0.154512	0.0592301	0.0430794	0.0681032	0.0398608	0.0498584	0.311328	0.0545231	0.264544	0.0981215	0.0793168
Cyclobacteriaceae	0.0511673	0.205769	0.00652478	0.1049	0.0152045	0.0824387	0.0478814	0.23328	0.0397037	0.0464051	0.2932	0.0295334	0.301488	0.226649	0.0464517	0.17677	0.0478814	0.0415487	0.110933	0.0995553	0.0211535	0.0211535	0.2932	0.0354137	0.0464517	0.0879781	0.0572254	0.0921948	0.0578381	0.19314	0.0397037	0.0152045	0.0354137	0.0464051	0.0415487	0.326797	0.0295334	0.23328	0.0929797	0.0981749
Erysipelotrichaceae	0.0255836	0.286231	0.0142359	0.0742367	0.0228068	0.0531272	0.0185141	0.307833	0.00715969	0.0249874	0.0310765	0.0283975	0.321257	0.363794	0.0232259	0.305162	0.0185141	0.0281253	0.10857	0.134463	0.0201217	0.0201217	0.0310765	0.0136206	0.0232259	0.0750401	0.0533236	0.0792875	0.0737934	0.378554	0.00715969	0.0228068	0.0136206	0.0249874	0.0281253	0.42735	0.0283975	0.307833	0.0904692	0.132633
Pasteurellaceae	0.0746189	0.211046	0.00889743	0.130721	0.0405453	0.106254	0.039582	0.253321	0.0351476	0.0345064	0.139169	0.0465719	0.257006	0.251191	0.0159263	0.20096	0.039582	0.0172587	0.105684	0.090917	0.0696519	0.0696519	0.139169	0.0326895	0.0159263	0.094447	0.0949421	0.129073	0.109693	0.355377	0.0351476	0.0405453	0.0326895	0.0345064	0.0172587	0.39061	0.0465719	0.253321	0.108959	0.112188
Barnesiellaceae	0.0319795	0.257212	0.00415213	0.172681	0.00760225	0.11175	0.0217062	0.290998	0.00585793	0.019038	0.0162138	0.0193103	0.321257	0.321929	0.00995395	0.191656	0.0217062	0.00575289	0.101709	0.122167	0.0201217	0.0201217	0.0162138	0.00363217	0.00995395	0.152668	0.0949421	0.200985	0.223375	0.301298	0.00585793	0.00760225	0.00363217	0.019038	0.00575289	0.291991	0.0193103	0.290998	0.0937496	0.115603
Christensenellaceae	0.0255836	0.25985	0.00237265	0.0774643	0.00337878	0.0549591	0.00638419	0.270155	0.00195264	0.00416456	0.00945805	0.0159026	0.392922	0.375343	0.00398158	0.308883	0.00638419	0.00703131	0.101454	0.144734	0.00928692	0.00928692	0.00945805	0.00181609	0.00398158	0.0530456	0.0611271	0.0774436	0.0598325	0.231768	0.00195264	0.00337878	0.00181609	0.00416456	0.00703131	0.353869	0.0159026	0.270155	0.0652954	0.106254
Zoogloeaceae	0.0916747	0.0778231	0.0207607	0.0968304	0.119947	0.0952625	0.129599	0.139487	0.101537	0.0767469	0.168894	0.103367	0.111204	0.0895048	0.0464517	0.104202	0.129599	0.101634	0.100251	0.0334355	0.0572693	0.0572693	0.168894	0.139839	0.0464517	0.107385	0.0988438	0.123541	0.125648	0.115884	0.101537	0.119947	0.139839	0.0767469	0.101634	0.143095	0.103367	0.139487	0.10926	0.0332441
Actinomycetaceae	0.0490353	0.236107	0.00652478	0.145246	0.0244961	0.104422	0.0325594	0.259734	0.0253843	0.0232025	0.0256719	0.0238539	0.274304	0.254078	0.0165899	0.249339	0.0325594	0.0153411	0.0999139	0.104481	0.0227014	0.0227014	0.0256719	0.0236091	0.0165899	0.143611	0.0897398	0.145668	0.159553	0.231768	0.0253843	0.0244961	0.0236091	0.0232025	0.0153411	0.30746	0.0238539	0.259734	0.0880386	0.0961666
Selenomonadaceae	0.0554312	0.278316	0.00889743	0.116197	0.0101363	0.0897666	0.0134068	0.261337	0.00585793	0.00773418	0.0081069	0.0159026	0.303959	0.303162	0.00995395	0.277251	0.0134068	0.00958816	0.0993561	0.122477	0.0165101	0.0165101	0.0081069	0.00454021	0.00995395	0.100916	0.085838	0.143824	0.137615	0.270396	0.00585793	0.0101363	0.00454021	0.00773418	0.00958816	0.355803	0.0159026	0.261337	0.081395	0.110406
Clostridiales Family XIII. Incertae Sedis	0.0170558	0.28755	0.00711794	0.040346	0.0143598	0.0311435	0.0114915	0.305428	0.0032544	0.00535443	0.0135115	0.0159026	0.370682	0.343583	0.0112811	0.269808	0.0114915	0.0108666	0.0983459	0.140222	0.0144463	0.0144463	0.0135115	0.00544826	0.0112811	0.0362263	0.0221098	0.0663802	0.0598325	0.347651	0.0032544	0.0143598	0.00544826	0.00535443	0.0108666	0.40608	0.0159026	0.305428	0.075446	0.130109
Methylobacteriaceae	0.0874107	0.130584	0.0154222	0.167839	0.0329431	0.133734	0.0561809	0.261337	0.0683425	0.0547342	0.0675575	0.0374847	0.118618	0.14725	0.0318526	0.143277	0.0561809	0.0735092	0.0935699	0.062034	0.0361158	0.0361158	0.0675575	0.0572067	0.0318526	0.122911	0.0988438	0.210204	0.145592	0.108158	0.0683425	0.0329431	0.0572067	0.0547342	0.0735092	0.185636	0.0374847	0.261337	0.0936529	0.0673594
Veillonellaceae	0.0319795	0.241383	0.00415213	0.0887612	0.00929164	0.064119	0.0127684	0.230073	0.00520705	0.00951899	0.0135115	0.00795129	0.328671	0.314711	0.0152627	0.271668	0.0127684	0.0127842	0.0930324	0.121385	0.0144463	0.0144463	0.0135115	0.00908043	0.0152627	0.0530456	0.052023	0.0829753	0.107698	0.270396	0.00520705	0.00929164	0.00908043	0.00951899	0.0127842	0.315195	0.00795129	0.230073	0.0684437	0.0989671
Erythrobacteraceae	0.0596951	0.156965	0.0100838	0.12588	0.0439241	0.0970945	0.0542656	0.215643	0.0702951	0.0511646	0.110794	0.045436	0.202639	0.157355	0.0245531	0.132113	0.0542656	0.0498584	0.0923347	0.0607305	0.034052	0.034052	0.110794	0.0463102	0.0245531	0.0815091	0.0832369	0.121697	0.117671	0.0772559	0.0702951	0.0439241	0.0463102	0.0511646	0.0498584	0.18757	0.045436	0.215643	0.0800741	0.0531334
Nocardioidaceae	0.0788828	0.143775	0.0166085	0.175909	0.0473029	0.133734	0.0466046	0.193999	0.0559757	0.0499747	0.0702598	0.0499796	0.155686	0.166017	0.0238895	0.12467	0.0466046	0.036435	0.0897948	0.0580998	0.0299245	0.0299245	0.0702598	0.0535745	0.0238895	0.169487	0.122254	0.204672	0.193458	0.146786	0.0559757	0.0473029	0.0535745	0.0499747	0.036435	0.230112	0.0499796	0.193999	0.0978658	0.0717248
Pseudoalteromonadaceae	0.155634	0.130584	0.00949059	0.0726228	0.0380113	0.108086	0.039582	0.135479	0.0410055	0.0243924	0.214833	0.0374847	0.185341	0.167461	0.0165899	0.145138	0.039582	0.0166195	0.0876631	0.0672014	0.0402433	0.0402433	0.214833	0.0299654	0.0165899	0.0556332	0.109248	0.0977265	0.0638213	0.092707	0.0410055	0.0380113	0.0299654	0.0243924	0.0166195	0.204974	0.0374847	0.135479	0.0716079	0.0604807
Geobacteraceae	0.0234517	0.220279	0.00355897	0.132335	0.0160492	0.0861027	0.0280904	0.221255	0.0149703	0.0154684	0.0243207	0.0215821	0.232294	0.261296	0.0119447	0.199099	0.0280904	0.0204547	0.0867024	0.0950072	0.0159941	0.0159941	0.0243207	0.021793	0.0119447	0.0931532	0.0884392	0.149356	0.125648	0.231768	0.0149703	0.0160492	0.021793	0.0154684	0.0204547	0.286189	0.0215821	0.221255	0.0775651	0.0890058
Odoribacteraceae	0.0234517	0.185984	0.00711794	0.0952166	0.00337878	0.064119	0.0191526	0.283783	0.00455616	0.0113038	0.0229696	0.0238539	0.271833	0.264184	0.0139355	0.186074	0.0191526	0.00767053	0.0837632	0.103799	0.0526259	0.0526259	0.0229696	0.000908043	0.0139355	0.0750401	0.0403179	0.0977265	0.0937375	0.231768	0.00455616	0.00337878	0.000908043	0.0113038	0.00767053	0.295858	0.0238539	0.283783	0.0729426	0.0966053
Paludibacteraceae	0.0106598	0.104204	0.0130496	0.0355045	0.0363219	0.0256476	0.158328	0.110627	0.0260352	0.112443	0.109443	0.022718	0.172985	0.137145	0.0524241	0.104202	0.158328	0.0287645	0.0788238	0.0563067	0.0165101	0.0165101	0.109443	0.0408619	0.0524241	0.0336387	0.0221098	0.0719119	0.0638213	0.154512	0.0260352	0.0363219	0.0408619	0.112443	0.0287645	0.220443	0.022718	0.110627	0.0655532	0.0557395
Synechococcaceae	0.0362435	0.170156	0.0112701	0.0823059	0.0397006	0.062287	0.0306441	0.195602	0.0455616	0.0166582	0.0391834	0.0272616	0.197697	0.203551	0.0119447	0.199099	0.0306441	0.0127842	0.0784775	0.0755376	0.034052	0.034052	0.0391834	0.0454021	0.0119447	0.0789215	0.0507225	0.0977265	0.10371	0.162237	0.0455616	0.0397006	0.0454021	0.0166582	0.0127842	0.282322	0.0272616	0.195602	0.0735136	0.0723854
Propionibacteriaceae	0.0469033	0.172794	0.00533846	0.127493	0.0211174	0.0934305	0.0223447	0.180371	0.032544	0.018443	0.017565	0.0181744	0.234765	0.183341	0.00530877	0.184213	0.0223447	0.0230116	0.0783057	0.0789396	0.0221854	0.0221854	0.017565	0.0127126	0.00530877	0.094447	0.0546242	0.119853	0.145592	0.162237	0.032544	0.0211174	0.0127126	0.018443	0.0230116	0.20304	0.0181744	0.180371	0.0647847	0.0670154
Deinococcaceae	0.0532992	0.125308	0.0112701	0.109741	0.0346325	0.0861027	0.0293673	0.166743	0.0344967	0.0273671	0.0297253	0.0272616	0.202639	0.180453	0.0225623	0.167467	0.0293673	0.0249292	0.0757074	0.065103	0.0252811	0.0252811	0.0297253	0.021793	0.0225623	0.0996222	0.0871386	0.105102	0.0897487	0.154512	0.0344967	0.0346325	0.021793	0.0273671	0.0249292	0.1721	0.0272616	0.166743	0.065005	0.05422
Thermoanaerobacterales Family III. Incertae Sedis	0.0149238	0.162241	0.0100838	0.0532567	0.019428	0.0366394	0.0140452	0.234081	0.00455616	0.00951899	0.0202673	0.0261257	0.249592	0.223762	0.0152627	0.217707	0.0140452	0.0134234	0.0743867	0.093359	0.0128985	0.0128985	0.0202673	0.00908043	0.0152627	0.0414014	0.0325144	0.0516291	0.0438771	0.26267	0.00455616	0.019428	0.00908043	0.00951899	0.0134234	0.319063	0.0261257	0.234081	0.0632098	0.0980777
Peptoniphilaceae	0.0191877	0.139818	0.00949059	0.0823059	0.0244961	0.0549591	0.0108531	0.200412	0.00650881	0.00832912	0.0243207	0.0306693	0.239707	0.238198	0.00862675	0.202821	0.0108531	0.0140626	0.0736455	0.087591	0.0128985	0.0128985	0.0243207	0.00272413	0.00862675	0.0491642	0.0325144	0.0571608	0.0678101	0.185414	0.00650881	0.0244961	0.00272413	0.00832912	0.0140626	0.332599	0.0306693	0.200412	0.0596296	0.0892341
Chlorobiaceae	0.0341115	0.16356	0.0047453	0.111355	0.00929164	0.0787748	0.0134068	0.186784	0.0136685	0.0142785	0.027023	0.0159026	0.219938	0.197777	0.00663596	0.17491	0.0134068	0.00958816	0.0719532	0.079808	0.0159941	0.0159941	0.027023	0.0145287	0.00663596	0.0659835	0.0702311	0.103258	0.107698	0.208591	0.0136685	0.00929164	0.0145287	0.0142785	0.00958816	0.25525	0.0159026	0.186784	0.0641795	0.078022
Nostocaceae	0.0298476	0.133223	0.00771111	0.101672	0.0244961	0.0714469	0.0153221	0.173156	0.0182247	0.0172532	0.0526949	0.0181744	0.18287	0.171792	0.0179171	0.139556	0.0153221	0.0223724	0.0673916	0.0643663	0.0206376	0.0206376	0.0526949	0.0063563	0.0179171	0.0595146	0.0559248	0.118009	0.0618269	0.270396	0.0182247	0.0244961	0.0063563	0.0172532	0.0223724	0.220443	0.0181744	0.173156	0.0657995	0.0783165
Thermoanaerobacteraceae	0.0106598	0.149051	0.00711794	0.0645536	0.0143598	0.0421353	0.0114915	0.181172	0.00650881	0.0101139	0.0243207	0.0181744	0.219938	0.225206	0.0106175	0.182353	0.0114915	0.0153411	0.0669225	0.0821615	0.0247651	0.0247651	0.0243207	0.00908043	0.0106175	0.0414014	0.0286127	0.053473	0.0518548	0.177689	0.00650881	0.0143598	0.00908043	0.0101139	0.0153411	0.251383	0.0181744	0.181172	0.0529285	0.0720529
Coriobacteriaceae	0.0255836	0.187303	0.00296581	0.0580983	0.00422347	0.0439673	0.00255368	0.177966	0.0032544	0.00356962	0.00675575	0.00795129	0.185341	0.203551	0.00464517	0.208403	0.00255368	0.00191763	0.0628113	0.0844066	0.0051594	0.0051594	0.00675575	0.00181609	0.00464517	0.0465766	0.0260115	0.0424096	0.0558436	0.169963	0.0032544	0.00422347	0.00181609	0.00356962	0.00191763	0.20304	0.00795129	0.177966	0.042671	0.0673044
Flammeovirgaceae	0.0277156	0.134542	0.00415213	0.0693951	0.00591286	0.0512952	0.0185141	0.149908	0.0117159	0.0232025	0.0432368	0.0159026	0.197697	0.19489	0.0126083	0.132113	0.0185141	0.0159803	0.0626275	0.0671518	0.0149623	0.0149623	0.0432368	0.0127126	0.0126083	0.0543394	0.0468207	0.0663802	0.0598325	0.200865	0.0117159	0.00591286	0.0127126	0.0232025	0.0159803	0.264919	0.0159026	0.149908	0.0570541	0.0733876
Acidaminococcaceae	0.0213197	0.149051	0.00652478	0.0532567	0.00337878	0.0403034	0.00319209	0.178768	0	0.00297469	0.00675575	0.0102231	0.259477	0.186228	0.000663596	0.163745	0.00319209	0.0063921	0.0608581	0.0845468	0.00722316	0.00722316	0.00675575	0.00181609	0.000663596	0.056927	0.0273121	0.0755997	0.0737934	0.19314	0	0.00337878	0.00181609	0.00297469	0.0063921	0.247515	0.0102231	0.178768	0.0500845	0.0770189
Helicobacteraceae	0.0255836	0.100247	0.00355897	0.0742367	0.0270302	0.0531272	0.019791	0.146702	0.0182247	0.0107089	0.0283742	0.0283975	0.195226	0.171792	0.0126083	0.117227	0.019791	0.0172587	0.0594379	0.060574	0.0211535	0.0211535	0.0283742	0.0118046	0.0126083	0.0582208	0.033815	0.101414	0.0438771	0.177689	0.0182247	0.0270302	0.0118046	0.0107089	0.0172587	0.243648	0.0283975	0.146702	0.0563269	0.0670875
Ectothiorhodospiraceae	0.0383754	0.0870563	0.00771111	0.0758505	0.0557498	0.0604551	0.0574577	0.115437	0.0481652	0.0309367	0.0405345	0.0408924	0.123561	0.0880612	0.0185807	0.0967586	0.0574577	0.0217332	0.0591541	0.0328668	0.0294086	0.0294086	0.0405345	0.0735514	0.0185807	0.0452828	0.0481213	0.101414	0.081771	0.0463535	0.0481652	0.0557498	0.0735514	0.0309367	0.0217332	0.112155	0.0408924	0.115437	0.0562805	0.03014
Carnobacteriaceae	0.0362435	0.0778231	0.00652478	0.0677813	0.0320984	0.0549591	0.0491582	0.103413	0.00650881	0.0202279	0.0459391	0.0704257	0.111204	0.118377	0.0577329	0.137695	0.0491582	0.0147018	0.0588873	0.0387879	0.126921	0.126921	0.0459391	0.0690112	0.0577329	0.0517518	0.052023	0.0829753	0.081771	0.231768	0.00650881	0.0320984	0.0690112	0.0202279	0.0147018	0.175968	0.0704257	0.103413	0.0788427	0.0575399
Rhodanobacteraceae	0.0511673	0.0633137	0.0118632	0.0871474	0.060818	0.0714469	0.0453277	0.0921895	0.0624845	0.0452152	0.0459391	0.045436	0.0914348	0.0765122	0.0252167	0.0800119	0.0453277	0.0338782	0.057485	0.0227722	0.034052	0.034052	0.0459391	0.0454021	0.0252167	0.0685711	0.0559248	0.0682241	0.081771	0.0695303	0.0624845	0.060818	0.0454021	0.0452152	0.0338782	0.0966856	0.045436	0.0921895	0.0561551	0.020492
Rivulariaceae	0.0426394	0.10948	0.00118632	0.0790782	0.0101363	0.064119	0.0102147	0.125057	0.00715969	0.0166582	0.0216184	0.0124949	0.165571	0.140032	0.00995395	0.128391	0.0102147	0.012145	0.053675	0.0558192	0.0123826	0.0123826	0.0216184	0.00454021	0.00995395	0.0517518	0.0325144	0.0719119	0.081771	0.0772559	0.00715969	0.0101363	0.00454021	0.0166582	0.012145	0.18757	0.0124949	0.125057	0.0417691	0.0500759
Legionellaceae	0.0383754	0.0936515	0.00771111	0.0629398	0.0143598	0.0531272	0.019791	0.113032	0.0123667	0.0107089	0.0499926	0.0170385	0.175456	0.138588	0.0126083	0.107923	0.019791	0.0166195	0.05356	0.0510752	0.0247651	0.0247651	0.0499926	0.0227011	0.0126083	0.0388138	0.042919	0.0626925	0.0737934	0.115884	0.0123667	0.0143598	0.0227011	0.0107089	0.0166195	0.181769	0.0170385	0.113032	0.0476406	0.0466982
Spiroplasmataceae	0.0213197	0.0567185	0.00830427	0.101672	0.0152045	0.0677829	0.0153221	0.147503	0.00650881	0.00773418	0.0229696	0.0147667	0.155686	0.138588	0.0126083	0.106062	0.0153221	0.0185371	0.0518117	0.0536078	0.0206376	0.0206376	0.0229696	0.00544826	0.0126083	0.113854	0.0390173	0.0921948	0.0797766	0.131335	0.00650881	0.0152045	0.00544826	0.00773418	0.0185371	0.274587	0.0147667	0.147503	0.0571538	0.0717218
Akkermansiaceae	0.00426394	0.0976086	0.00296581	0.0290491	0.00168939	0.0183197	0.00191526	0.176363	0.00390528	0.00178481	0.0054046	0.0034077	0.257006	0.226649	0.00398158	0.0707082	0.00191526	0.00447447	0.050634	0.08339	0.00206376	0.00206376	0.0054046	0.00363217	0.00398158	0.0258759	0.0182081	0.0221267	0.023933	0.092707	0.00390528	0.00168939	0.00363217	0.00178481	0.00447447	0.129559	0.0034077	0.176363	0.0291562	0.0505142
Desulfobacteraceae	0.00852788	0.117394	0.00355897	0.0645536	0.00844694	0.0403034	0.00893786	0.12666	0.00846145	0.0107089	0.0351299	0.0136308	0.140859	0.158799	0.00464517	0.139556	0.00893786	0.00703131	0.0503412	0.057664	0.00980286	0.00980286	0.0351299	0.00817238	0.00464517	0.0310511	0.0325144	0.0516291	0.0538492	0.139061	0.00846145	0.00844694	0.00817238	0.0107089	0.00703131	0.226244	0.0136308	0.12666	0.0436119	0.0603871
Myxococcaceae	0.0405074	0.102885	0.00830427	0.100058	0.0236514	0.0751108	0.0242599	0.100206	0.0260352	0.0196329	0.017565	0.0102231	0.103791	0.101054	0.0132719	0.0893156	0.0242599	0.0249292	0.0502811	0.0386951	0.0139304	0.0139304	0.017565	0.0254252	0.0132719	0.0970346	0.0663294	0.121697	0.0977264	0.0695303	0.0260352	0.0236514	0.0254252	0.0196329	0.0249292	0.123758	0.0102231	0.100206	0.0494612	0.0411929
Listeriaceae	0.0191877	0.0883753	0.00830427	0.0322768	0.00844694	0.0274796	0.0108531	0.124255	0.0032544	0.0118987	0.017565	0.0159026	0.175456	0.138588	0.0597237	0.133973	0.0108531	0.0178979	0.0502385	0.055784	0.00928692	0.00928692	0.017565	0.0108965	0.0597237	0.043989	0.0234104	0.0387218	0.0398883	0.216316	0.0032544	0.00844694	0.0108965	0.0118987	0.0178979	0.181769	0.0159026	0.124255	0.0468559	0.0625014
Piscirickettsiaceae	0.0298476	0.039571	0.00296581	0.0322768	0.0405453	0.0311435	0.035113	0.0809665	0.059881	0.0856709	0.147275	0.0215821	0.0790787	0.0664068	0.0199079	0.0707082	0.035113	0.0255684	0.0502012	0.0339323	0.017542	0.017542	0.147275	0.0363217	0.0199079	0.0401076	0.0416184	0.0387218	0.0358995	0.0849815	0.059881	0.0405453	0.0363217	0.0856709	0.0255684	0.0696136	0.0215821	0.0809665	0.0500037	0.0332324
Leuconostocaceae	0.0213197	0.0870563	0.00355897	0.0468014	0.0101363	0.0366394	0.0127684	0.119446	0.0032544	0.0118987	0.0229696	0.0374847	0.172985	0.134257	0.00862675	0.12467	0.0127684	0.00703131	0.0485373	0.0539985	0.0423071	0.0423071	0.0229696	0.00454021	0.00862675	0.0452828	0.0273121	0.0663802	0.0558436	0.131335	0.0032544	0.0101363	0.00454021	0.0118987	0.00703131	0.199172	0.0374847	0.119446	0.0466593	0.0532761
Methylococcaceae	0.0298476	0.0633137	0.00533846	0.0597121	0.0422347	0.0476313	0.035113	0.0978011	0.0260352	0.0220127	0.0891759	0.022718	0.0988484	0.0837303	0.00796316	0.0818727	0.035113	0.0249292	0.0485217	0.0306778	0.017026	0.017026	0.0891759	0.0299654	0.00796316	0.0582208	0.0442196	0.0590047	0.0658157	0.0772559	0.0260352	0.0422347	0.0299654	0.0220127	0.0249292	0.15083	0.022718	0.0978011	0.0490111	0.0365248
Cellvibrionaceae	0.10873	0.073866	0.00355897	0.030663	0.0380113	0.064119	0.0319209	0.0601236	0.0371002	0.0172532	0.0945805	0.0306693	0.0642515	0.0692941	0.0112811	0.0688475	0.0319209	0.0127842	0.0471653	0.0296239	0.0294086	0.0294086	0.0945805	0.0381378	0.0112811	0.0336387	0.06763	0.0165951	0.0319107	0.0618047	0.0371002	0.0380113	0.0381378	0.0172532	0.0127842	0.0870171	0.0306693	0.0601236	0.0408607	0.0241167
Polyangiaceae	0.0319795	0.0725469	0.00415213	0.0903751	0.0278749	0.065951	0.0255368	0.0801648	0.038402	0.0261772	0.0297253	0.0306693	0.093906	0.0736249	0.0165899	0.0781512	0.0255368	0.0325997	0.0468869	0.0281025	0.025797	0.025797	0.0297253	0.0236091	0.0165899	0.0866843	0.0715317	0.105102	0.0937375	0.0386279	0.038402	0.0278749	0.0236091	0.0261772	0.0325997	0.114089	0.0306693	0.0801648	0.0494882	0.0324131
Oceanospirillaceae	0.0191877	0.0646327	0.00593162	0.040346	0.0152045	0.0311435	0.0319209	0.0689417	0.0208282	0.0148734	0.193215	0.0147667	0.106262	0.0678504	0.00862675	0.0707082	0.0319209	0.0147018	0.0456145	0.0461064	0.0159941	0.0159941	0.193215	0.0245171	0.00862675	0.0323449	0.0364161	0.0405657	0.0319107	0.092707	0.0208282	0.0152045	0.0245171	0.0148734	0.0147018	0.0966856	0.0147667	0.0689417	0.0423783	0.0459192
Sporomusaceae	0.00852788	0.0699089	0.0118632	0.0274353	0.0101363	0.0201517	0.0159605	0.0913879	0.00520705	0.00773418	0.0283742	0.179472	0.093906	0.0822867	0.0126083	0.0818727	0.0159605	0.0166195	0.0433007	0.0468441	0.600554	0.600554	0.0283742	0.00817238	0.0126083	0.0232883	0.00650288	0.0258145	0.0119665	0.108158	0.00520705	0.0101363	0.00817238	0.00773418	0.0166195	0.116023	0.179472	0.0913879	0.103375	0.1875
Methylophilaceae	0.0234517	0.0553995	0.0047453	0.0242076	0.0565945	0.0238156	0.035113	0.0561154	0.0481652	0.0249874	0.0797179	0.0477078	0.0716651	0.0793995	0.0165899	0.0837334	0.035113	0.012145	0.0432593	0.0247069	0.0361158	0.0361158	0.0797179	0.0499423	0.0165899	0.0336387	0.0273121	0.035034	0.0319107	0.0695303	0.0481652	0.0565945	0.0499423	0.0249874	0.012145	0.0928182	0.0477078	0.0561154	0.044688	0.021107
Brachyspiraceae	0.0149238	0.075185	0.0047453	0.0613259	0.0152045	0.0421353	0.0127684	0.116239	0.00455616	0.00773418	0.017565	0.0181744	0.145801	0.114046	0.00796316	0.0855941	0.0127684	0.0108666	0.0426443	0.0455433	0.017026	0.017026	0.017565	0.0063563	0.00796316	0.0491642	0.0286127	0.0626925	0.0498604	0.200865	0.00455616	0.0152045	0.0063563	0.00773418	0.0108666	0.199172	0.0181744	0.116239	0.0464131	0.0624018
Dysgonamonadaceae	0.0149238	0.0791421	0.00237265	0.0726228	0.00506817	0.0476313	0.00957628	0.0929912	0.00781057	0.0267722	0.0418857	0.0034077	0.140859	0.103941	0.00796316	0.0744297	0.00957628	0.00703131	0.0415558	0.04246	0.00877098	0.00877098	0.0418857	0.00454021	0.00796316	0.0414014	0.0416184	0.0553169	0.0757878	0.0463535	0.00781057	0.00506817	0.00454021	0.0267722	0.00703131	0.0850833	0.0034077	0.0929912	0.0313952	0.030118
Leptotrichiaceae	0.0170558	0.073866	0.00415213	0.0564844	0.00844694	0.0403034	0.0114915	0.109024	0.00130176	0.00535443	0.0216184	0.0124949	0.116147	0.132814	0.0112811	0.0930371	0.0114915	0.0115058	0.0409928	0.044227	0.0103188	0.0103188	0.0216184	0.00181609	0.0112811	0.0414014	0.0260115	0.0645364	0.0418827	0.131335	0.00130176	0.00844694	0.00181609	0.00535443	0.0115058	0.18757	0.0124949	0.109024	0.0387797	0.0524473
Acidobacteriaceae	0.0106598	0.110799	0.00415213	0.0855335	0.0143598	0.0531272	0.0114915	0.0873797	0.00781057	0.00832912	0.0121604	0.00681539	0.106262	0.0866176	0.00331798	0.0986193	0.0114915	0.00894895	0.0404375	0.0421158	0.00619128	0.00619128	0.0121604	0.0127126	0.00331798	0.050458	0.042919	0.070068	0.0658157	0.108158	0.00781057	0.0143598	0.0127126	0.00832912	0.00894895	0.110222	0.00681539	0.0873797	0.0352539	0.0373869
Alcanivoracaceae	0.0277156	0.0408901	0.00415213	0.0387322	0.0456135	0.0348075	0.0357515	0.0521071	0.043609	0.0196329	0.0783667	0.0295334	0.0889636	0.0548578	0.0205715	0.05024	0.0357515	0.012145	0.0396356	0.0210922	0.0263129	0.0263129	0.0783667	0.0354137	0.0205715	0.0271697	0.033815	0.0331901	0.0279218	0.0772559	0.043609	0.0456135	0.0354137	0.0196329	0.012145	0.0734811	0.0295334	0.0521071	0.0387703	0.0197551
Fibrobacteraceae	0.0341115	0.0461662	0.00118632	0.24369	0.000844694	0.153886	0.00191526	0.0472972	0	0.000594937	0	0.00795129	0.0444818	0.0649632	0.00199079	0.0521008	0.00191526	0.00127842	0.0391318	0.0641808	0.00103188	0.00103188	0	0.00272413	0.00199079	0.125498	0.0507225	0.947762	0.434783	0.0540791	0	0.000844694	0.00272413	0.000594937	0.00127842	0.0715474	0.00795129	0.0472972	0.0973256	0.235831
Colwelliaceae	0.0575632	0.0699089	0.000593162	0.0338906	0.0126704	0.0439673	0.0153221	0.0721483	0.0143194	0.00892406	0.0972828	0.011359	0.0691939	0.0765122	0.00663596	0.0707082	0.0153221	0.00703131	0.037964	0.0314251	0.0180579	0.0180579	0.0972828	0.00998847	0.00663596	0.0349325	0.0468207	0.0424096	0.0538492	0.0772559	0.0143194	0.0126704	0.00998847	0.00892406	0.00703131	0.114089	0.011359	0.0721483	0.0364345	0.0337724
Synergistaceae	0.0234517	0.0725469	0.00177949	0.0532567	0.0118257	0.0403034	0.00446893	0.105818	0.0032544	0.00416456	0.00945805	0.0102231	0.128503	0.111159	0.00331798	0.0893156	0.00446893	0.00511368	0.0379127	0.0439833	0.00980286	0.00980286	0.00945805	0.0063563	0.00331798	0.0478704	0.0247109	0.0516291	0.0518548	0.0695303	0.0032544	0.0118257	0.0063563	0.00416456	0.00511368	0.127625	0.0102231	0.105818	0.0310397	0.0375
Opitutaceae	0.0277156	0.0910134	0.00415213	0.0952166	0.00422347	0.065951	0.00574577	0.0873797	0.00390528	0.00832912	0.0081069	0.011359	0.0790787	0.0923921	0.00398158	0.0725689	0.00574577	0.012145	0.0377228	0.0384158	0.00154782	0.00154782	0.0081069	0.0063563	0.00398158	0.0866843	0.0546242	0.112478	0.13562	0.0309023	0.00390528	0.00422347	0.0063563	0.00832912	0.012145	0.114089	0.011359	0.0873797	0.0383131	0.0468242
Desulfuromonadaceae	0.0149238	0.0830992	0.00237265	0.0387322	0.0168939	0.0293115	0.0114915	0.106619	0.0117159	0.0118987	0.0108092	0.00795129	0.0815499	0.109716	0.00199079	0.106062	0.0114915	0.012145	0.0371541	0.0399338	0.00877098	0.00877098	0.0108092	0.00817238	0.00199079	0.0582208	0.0299133	0.0516291	0.0578381	0.131335	0.0117159	0.0168939	0.00817238	0.0118987	0.012145	0.146962	0.00795129	0.106619	0.0383227	0.0455409
Intrasporangiaceae	0.0341115	0.0488043	0.00296581	0.0532567	0.0168939	0.0457993	0.0178757	0.0825698	0.0214791	0.0142785	0.0216184	0.0181744	0.0864924	0.0837303	0.00929035	0.0539615	0.0178757	0.0159803	0.0358421	0.0269145	0.00980286	0.00980286	0.0216184	0.00726434	0.00929035	0.0698649	0.0377167	0.070068	0.0578381	0.0386279	0.0214791	0.0168939	0.00726434	0.0142785	0.0159803	0.0715474	0.0181744	0.0825698	0.0322268	0.0262128
Alicyclobacillaceae	0.00426394	0.108161	0.00237265	0.030663	0.00844694	0.0201517	0.00446893	0.104214	0.00390528	0.00297469	0.0081069	0.00567949	0.10132	0.112603	0.00464517	0.0986193	0.00446893	0.00319605	0.0349034	0.0453335	0.00464346	0.00464346	0.0081069	0.00363217	0.00464517	0.0297573	0.0130058	0.0460974	0.0339051	0.0849815	0.00390528	0.00844694	0.00363217	0.00297469	0.00319605	0.108288	0.00567949	0.104214	0.0263197	0.035944
Thermaceae	0.0149238	0.0896944	0.000593162	0.050029	0.010981	0.0348075	0.01213	0.0777599	0.00976321	0.00713925	0.00675575	0.011359	0.0864924	0.0996102	0.00663596	0.0837334	0.01213	0.00767053	0.0345671	0.0357889	0.0123826	0.0123826	0.00675575	0.0172528	0.00663596	0.0310511	0.0364161	0.0663802	0.0398883	0.092707	0.00976321	0.010981	0.0172528	0.00713925	0.00767053	0.112155	0.011359	0.0777599	0.0319963	0.0330119
Francisellaceae	0.0170558	0.0725469	0.00415213	0.050029	0.00760225	0.0366394	0.00957628	0.0793632	0.0032544	0.00535443	0.0148627	0.00795129	0.118618	0.0837303	0.00729956	0.0725689	0.00957628	0.0127842	0.0340536	0.0359493	0.0185738	0.0185738	0.0148627	0.00544826	0.00729956	0.0375201	0.0286127	0.0553169	0.0358995	0.115884	0.0032544	0.00760225	0.00544826	0.00535443	0.0127842	0.145028	0.00795129	0.0793632	0.0335987	0.0408465
Xanthobacteraceae	0.0277156	0.0303378	0.0047453	0.0516429	0.0202727	0.0421353	0.0140452	0.0857764	0.0331949	0.0214177	0.0162138	0.011359	0.0840212	0.0447524	0.00729956	0.0483793	0.0140452	0.02429	0.0323136	0.0236646	0.0154782	0.0154782	0.0162138	0.00998847	0.00729956	0.0271697	0.0286127	0.0424096	0.0398883	0.0154512	0.0331949	0.0202727	0.00998847	0.0214177	0.02429	0.0444754	0.011359	0.0857764	0.0260425	0.0187846
Archangiaceae	0.0319795	0.0633137	0.00296581	0.0629398	0.00929164	0.0494632	0.0114915	0.0561154	0.0143194	0.0136836	0.0135115	0.00908719	0.0642515	0.0577451	0.00729956	0.0632652	0.0114915	0.0134234	0.0308688	0.0244369	0.00825504	0.00825504	0.0135115	0.00544826	0.00729956	0.0530456	0.0585259	0.0553169	0.0737934	0.0231768	0.0143194	0.00929164	0.00544826	0.0136836	0.0134234	0.0831496	0.00908719	0.0561154	0.028397	0.026571
Planctomycetaceae	0.00852788	0.0633137	0.00533846	0.0597121	0.00506817	0.0384714	0.0134068	0.0649335	0.00715969	0.0118987	0.0081069	0.011359	0.0889636	0.0765122	0.00199079	0.0632652	0.0134068	0.00703131	0.0304703	0.0299579	0.00722316	0.00722316	0.0081069	0.0136206	0.00199079	0.0815091	0.042919	0.0811314	0.0638213	0.0154512	0.00715969	0.00506817	0.0136206	0.0118987	0.00703131	0.137294	0.011359	0.0649335	0.0322978	0.0380489
Bartonellaceae	0.0170558	0.038252	0.00177949	0.050029	0.00675756	0.0366394	0.00893786	0.0745533	0.00781057	0.00237975	0.0081069	0.0102231	0.111204	0.0793995	0.00862675	0.0632652	0.00893786	0.00830974	0.030126	0.0326149	0.00825504	0.00825504	0.0081069	0.00363217	0.00862675	0.0297573	0.0156069	0.0424096	0.0398883	0.0695303	0.00781057	0.00675756	0.00363217	0.00237975	0.00830974	0.125691	0.0102231	0.0745533	0.0263014	0.033296
Gordoniaceae	0.0191877	0.039571	0.00237265	0.050029	0.0126704	0.0366394	0.0153221	0.0689417	0.0149703	0.0267722	0.0162138	0.011359	0.0691939	0.0649632	0.00530877	0.0539615	0.0153221	0.0127842	0.0297546	0.0225913	0.0149623	0.0149623	0.0162138	0.0154367	0.00530877	0.0478704	0.0325144	0.0553169	0.0438771	0.0695303	0.0149703	0.0126704	0.0154367	0.0267722	0.0127842	0.0599451	0.011359	0.0689417	0.0299374	0.0216816
Dermabacteraceae	0.0191877	0.0435282	0.00593162	0.0371183	0.0202727	0.0293115	0.019791	0.0633302	0.0195264	0.0172532	0.0135115	0.00908719	0.0741363	0.0707377	0.00597237	0.0558223	0.019791	0.00767053	0.0295544	0.0225864	0.00722316	0.00722316	0.0135115	0.0145287	0.00597237	0.0414014	0.0416184	0.0497852	0.0438771	0.0386279	0.0195264	0.0202727	0.0145287	0.0172532	0.00767053	0.0657462	0.00908719	0.0633302	0.0267325	0.0199826
Frankiaceae	0.0213197	0.0461662	0.00533846	0.0548706	0.0152045	0.0403034	0.0140452	0.0601236	0.0214791	0.0160633	0.0148627	0.0102231	0.0667227	0.0577451	0.00929035	0.0446578	0.0140452	0.0147018	0.0292868	0.0205499	0.00928692	0.00928692	0.0148627	0.0163448	0.00929035	0.0426952	0.0403179	0.0516291	0.0698045	0.0154512	0.0214791	0.0152045	0.0163448	0.0160633	0.0147018	0.0502765	0.0102231	0.0601236	0.0268548	0.0198108
Gallionellaceae	0.0106598	0.0329759	0.00237265	0.0129107	0.0363219	0.0128238	0.0453277	0.0392808	0.0494669	0.0130886	0.0256719	0.034077	0.046953	0.0404215	0.0185807	0.0334934	0.0453277	0.0223724	0.029007	0.0145694	0.0206376	0.0206376	0.0256719	0.0290574	0.0185807	0.0168193	0.0260115	0.0276584	0.0199442	0.0231768	0.0494669	0.0363219	0.0290574	0.0130886	0.0223724	0.0483428	0.034077	0.0392808	0.0277891	0.0102422
Prolixibacteraceae	0.0106598	0.0778231	0.00118632	0.0225938	0.00422347	0.0183197	0.0114915	0.0665368	0.00390528	0.0101139	0.0216184	0.00567949	0.0840212	0.0996102	0.00862675	0.0539615	0.0114915	0.00830974	0.0288985	0.0319454	0.00567534	0.00567534	0.0216184	0.00454021	0.00862675	0.0142317	0.0195086	0.0221267	0.0299162	0.0695303	0.00390528	0.00422347	0.00454021	0.0101139	0.00830974	0.116023	0.00567949	0.0665368	0.0233767	0.0304266
Rhodothermaceae	0.0319795	0.0540804	0.00177949	0.0629398	0.00168939	0.0494632	0.00766103	0.0633302	0.00390528	0.00654431	0.0081069	0.00681539	0.0766075	0.0678504	0.00530877	0.0465186	0.00766103	0.0178979	0.0288966	0.0272401	0.00619128	0.00619128	0.0081069	0.00363217	0.00530877	0.0478704	0.0403179	0.0903509	0.10371	0.0463535	0.00390528	0.00168939	0.00363217	0.00654431	0.0178979	0.0676799	0.00681539	0.0633302	0.0294182	0.0330979
Borreliaceae	0.0213197	0.0316568	0.00118632	0.0468014	0.010981	0.0366394	0.0108531	0.07295	0.0032544	0.00535443	0.0108092	0.011359	0.0914348	0.0765122	0.00398158	0.0669867	0.0108531	0.00703131	0.0288869	0.0294066	0.0077391	0.0077391	0.0108092	0.00363217	0.00398158	0.0478704	0.0208092	0.0479413	0.0538492	0.0618047	0.0032544	0.010981	0.00363217	0.00535443	0.00703131	0.139227	0.011359	0.07295	0.028887	0.0360109
Brucellaceae	0.00852788	0.0422091	0	0.0242076	0.0202727	0.0183197	0.0242599	0.110627	0.0442599	0.00892406	0.027023	0.0124949	0.0395394	0.0534142	0.00663596	0.0279111	0.0242599	0.0134234	0.0281283	0.0250944	0.0134144	0.0134144	0.027023	0.020885	0.00663596	0.0219945	0.0247109	0.0239706	0.0319107	0.0386279	0.0442599	0.0202727	0.020885	0.00892406	0.0134234	0.0715474	0.0124949	0.110627	0.0291679	0.0254552
Leptospiraceae	0.0106598	0.0514424	0.00177949	0.0484152	0.00337878	0.0329755	0.00702261	0.0689417	0.00195264	0.00535443	0.017565	0.0034077	0.0815499	0.0620759	0.00398158	0.0762904	0.00702261	0.00575289	0.0271983	0.0291727	0.00670722	0.00670722	0.017565	0.00454021	0.00398158	0.0284635	0.0143063	0.0442535	0.0358995	0.0695303	0.00195264	0.00337878	0.00454021	0.00535443	0.00575289	0.114089	0.0034077	0.0689417	0.0244095	0.0313285
Aerococcaceae	0.0170558	0.0699089	0.00118632	0.0225938	0.00337878	0.0201517	0.00383051	0.0633302	0.00195264	0.00594937	0.0229696	0.0011359	0.0988484	0.0736249	0.000663596	0.0669867	0.00383051	0.0063921	0.0268772	0.0320229	0.0108347	0.0108347	0.0229696	0.00544826	0.000663596	0.0258759	0.00780346	0.0368779	0.0179497	0.0849815	0.00195264	0.00337878	0.00544826	0.00594937	0.0063921	0.102487	0.0011359	0.0633302	0.0230174	0.030222
Nitrosomonadaceae	0.00852788	0.0448472	0.00296581	0.0177522	0.0287196	0.0146558	0.0357515	0.0545121	0.0240826	0.0142785	0.0391834	0.0159026	0.0321257	0.0360907	0.00597237	0.0427971	0.0357515	0.0159803	0.0261054	0.0148283	0.0159941	0.0159941	0.0391834	0.04177	0.00597237	0.0271697	0.0234104	0.0276584	0.0259274	0.0695303	0.0240826	0.0287196	0.04177	0.0142785	0.0159803	0.0638125	0.0159026	0.0545121	0.0306482	0.0177944
Promicromonosporaceae	0.0319795	0.0263807	0.0047453	0.071009	0.00675756	0.0549591	0.0172373	0.0521071	0.027337	0.00832912	0.0135115	0.00908719	0.0321257	0.0418652	0.00663596	0.0316326	0.0172373	0.0140626	0.0259444	0.0190231	0.0108347	0.0108347	0.0135115	0.0127126	0.00663596	0.043989	0.0221098	0.0626925	0.0438771	0	0.027337	0.00675756	0.0127126	0.00832912	0.0140626	0.0425417	0.00908719	0.0521071	0.0222296	0.0185296
Anaerolineaceae	0.00426394	0.0685898	0.000593162	0.0209799	0.00253408	0.0146558	0.00574577	0.0761566	0.000650881	0.00178481	0.0027023	0.00567949	0.0864924	0.0837303	0.00199079	0.0781512	0.00574577	0.00447447	0.025829	0.034221	0.0025797	0.0025797	0.0027023	0.00454021	0.00199079	0.0116442	0.0130058	0.0387218	0.0299162	0.0540791	0.000650881	0.00253408	0.00454021	0.00178481	0.00447447	0.0773485	0.00567949	0.0761566	0.0186072	0.0257845
Streptosporangiaceae	0.0191877	0.0514424	0.0047453	0.050029	0.0135151	0.0366394	0.00829944	0.043289	0.0208282	0.0124937	0.0135115	0.0147667	0.0568378	0.0476397	0.00464517	0.0465186	0.00829944	0.0108666	0.025753	0.0186816	0.0108347	0.0108347	0.0135115	0.00454021	0.00464517	0.0414014	0.0286127	0.0516291	0.047866	0.00772559	0.0208282	0.0135151	0.00454021	0.0124937	0.0108666	0.0502765	0.0147667	0.043289	0.0217876	0.0171414
Deferribacteraceae	0.0149238	0.0567185	0.00118632	0.0435737	0.00929164	0.0311435	0.00638419	0.0472972	0.00715969	0.00713925	0.00405345	0.0147667	0.0691939	0.0620759	0.00464517	0.0669867	0.00638419	0.00447447	0.025411	0.0249687	0.00928692	0.00928692	0.00405345	0.00181609	0.00464517	0.0362263	0.0221098	0.0295023	0.0438771	0.0540791	0.00715969	0.00929164	0.00181609	0.00713925	0.00447447	0.0773485	0.0147667	0.0472972	0.0213432	0.0219429
Fervidobacteriaceae	0.00639591	0.0488043	0.00118632	0.0322768	0.00591286	0.0219837	0.00638419	0.0649335	0.00260352	0.00535443	0.0108092	0.00795129	0.0766075	0.0952793	0.00199079	0.0558223	0.00638419	0.00319605	0.0252153	0.029833	0.00412752	0.00412752	0.0108092	0	0.00199079	0.0207007	0.0104046	0.0202829	0.0219386	0.0540791	0.00260352	0.00591286	0	0.00535443	0.00319605	0.106354	0.00795129	0.0649335	0.0191537	0.0282601
Halanaerobiaceae	0.0127918	0.0474853	0.00355897	0.0371183	0.00929164	0.0274796	0.00766103	0.0633302	0.00390528	0.00416456	0.00675575	0.00795129	0.0840212	0.0620759	0.00796316	0.0446578	0.00766103	0.00511368	0.0246104	0.0254544	0.0128985	0.0128985	0.00675575	0.000908043	0.00796316	0.0207007	0.00910403	0.0276584	0.023933	0.0618047	0.00390528	0.00929164	0.000908043	0.00416456	0.00511368	0.11989	0.00795129	0.0633302	0.0221766	0.030537
Hyphomonadaceae	0.0255836	0.0553995	0.00177949	0.0371183	0.00675756	0.0329755	0.0108531	0.0585203	0.0175738	0.0130886	0.0135115	0.00567949	0.0420106	0.0548578	0.00265439	0.0465186	0.0108531	0.00447447	0.0244561	0.0199886	0.00722316	0.00722316	0.0135115	0.00908043	0.00265439	0.0194069	0.0169075	0.0258145	0.0219386	0.0386279	0.0175738	0.00675756	0.00908043	0.0130886	0.00447447	0.0541439	0.00567949	0.0585203	0.0184282	0.0164186
Rickettsiaceae	0.0149238	0.036933	0	0.0338906	0.00591286	0.0256476	0.00127684	0.0681401	0.00195264	0.00535443	0.00945805	0.0124949	0.0988484	0.0534142	0.00464517	0.0539615	0.00127684	0.00447447	0.0240336	0.0282145	0.00722316	0.00722316	0.00945805	0.00272413	0.00464517	0.0271697	0.0169075	0.0202829	0.0339051	0.0849815	0.00195264	0.00591286	0.00272413	0.00535443	0.00447447	0.100553	0.0124949	0.0681401	0.0231182	0.0301121
Aurantimonadaceae	0.00639591	0.0474853	0.00177949	0.030663	0.00929164	0.0201517	0.00829944	0.0825698	0.0208282	0.00951899	0.0162138	0.00681539	0.0494242	0.0389779	0.00464517	0.05024	0.00829944	0.00894895	0.0233638	0.0220734	0.00928692	0.00928692	0.0162138	0.00908043	0.00464517	0.0284635	0.0260115	0.0387218	0.0279218	0.0154512	0.0208282	0.00929164	0.00908043	0.00951899	0.00894895	0.027072	0.00681539	0.0825698	0.019956	0.0183847
Marinifilaceae	0.0127918	0.0580375	0.00355897	0.0209799	0.00337878	0.0183197	0.00702261	0.0625286	0.00260352	0.00713925	0.0148627	0.0147667	0.0766075	0.0519706	0.00597237	0.0427971	0.00702261	0.00319605	0.0229753	0.0239884	0.00361158	0.00361158	0.0148627	0.00454021	0.00597237	0.0129379	0.00780346	0.00921948	0.0159553	0.0540791	0.00260352	0.00337878	0.00454021	0.00713925	0.00319605	0.0966856	0.0147667	0.0625286	0.0181907	0.0259132
Nitrospiraceae	0.0170558	0.0501233	0.00593162	0.0322768	0.010981	0.0256476	0.00702261	0.0464956	0.0032544	0.0047595	0.0121604	0.00795129	0.0543666	0.0577451	0.00331798	0.0539615	0.00702261	0.0108666	0.02283	0.0204548	0.00361158	0.00361158	0.0121604	0.00454021	0.00331798	0.0297573	0.0143063	0.0165951	0.0219386	0.0540791	0.0032544	0.010981	0.00454021	0.0047595	0.0108666	0.0792822	0.00795129	0.0464956	0.0184472	0.02122
Desulfobulbaceae	0.0149238	0.0580375	0.000593162	0.0371183	0.0126704	0.0274796	0.00510735	0.0553137	0.00455616	0.00654431	0.0108092	0.00908719	0.0395394	0.0577451	0.00199079	0.0595437	0.00510735	0.00255684	0.0227069	0.0222719	0.0025797	0.0025797	0.0108092	0.0063563	0.00199079	0.0258759	0.0130058	0.0460974	0.0159553	0.0386279	0.00455616	0.0126704	0.0063563	0.00654431	0.00255684	0.0560777	0.00908719	0.0553137	0.0176134	0.0185642
Oscillatoriaceae	0.0170558	0.0501233	0.00177949	0.0580983	0.00337878	0.0403034	0.00574577	0.0424874	0	0.00178481	0.0081069	0.0022718	0.0617803	0.0649632	0.000663596	0.0334934	0.00574577	0.00255684	0.022241	0.0242835	0.00103188	0.00103188	0.0081069	0.00454021	0.000663596	0.0388138	0.0416184	0.0626925	0.0538492	0.0309023	0	0.00337878	0.00454021	0.00178481	0.00255684	0.0831496	0.0022718	0.0424874	0.0213011	0.0262468
Marinilabiliaceae	0.00852788	0.0619946	0.00177949	0.0177522	0.00168939	0.0146558	0.00829944	0.0529088	0.00195264	0.00832912	0.0121604	0.0011359	0.0790787	0.0534142	0.00663596	0.0539615	0.00829944	0.00319605	0.0219873	0.0254167	0.0025797	0.0025797	0.0121604	0.00272413	0.00663596	0.0142317	0.00650288	0.0165951	0.0259274	0.0154512	0.00195264	0.00168939	0.00272413	0.00832912	0.00319605	0.040608	0.0011359	0.0529088	0.0121073	0.0144478
Chroococcaceae	0.0106598	0.039571	0.00296581	0.0451875	0.000844694	0.0311435	0.00446893	0.0448923	0.00455616	0.00594937	0.0081069	0.00681539	0.0642515	0.0591887	0.00530877	0.0427971	0.00446893	0.00575289	0.0214961	0.0218705	0.00722316	0.00722316	0.0081069	0.00272413	0.00530877	0.0465766	0.0182081	0.0460974	0.0438771	0.108158	0.00455616	0.000844694	0.00272413	0.00594937	0.00575289	0.0889508	0.00681539	0.0448923	0.0252216	0.0316934
Nocardiopsaceae	0.0191877	0.0342949	0.00177949	0.040346	0.00337878	0.0311435	0.00829944	0.0384791	0.00846145	0.00773418	0.00945805	0.00567949	0.0420106	0.0490833	0.00398158	0.05024	0.00829944	0.0147018	0.0209199	0.0172876	0.00670722	0.00670722	0.00945805	0.0063563	0.00398158	0.0401076	0.0299133	0.0424096	0.0179497	0.0231768	0.00846145	0.00337878	0.0063563	0.00773418	0.0147018	0.0541439	0.00567949	0.0384791	0.0180946	0.0159916
Brevibacteriaceae	0.0213197	0.0356139	0.00237265	0.040346	0.0126704	0.0329755	0.00510735	0.0392808	0.00715969	0.00713925	0.0027023	0.00567949	0.0543666	0.0447524	0.00132719	0.0483793	0.00510735	0.00703131	0.0207406	0.0187056	0.0077391	0.0077391	0.0027023	0.00817238	0.00132719	0.0258759	0.0195086	0.0331901	0.0219386	0.0540791	0.00715969	0.0126704	0.00817238	0.00713925	0.00703131	0.0618788	0.00567949	0.0392808	0.0184047	0.0178873
Prochloraceae	0.0149238	0.0211046	0.00296581	0.0290491	0.00675756	0.0238156	0.00957628	0.0577187	0.0032544	0.00594937	0.00405345	0.00795129	0.0617803	0.0447524	0.00265439	0.057683	0.00957628	0.00703131	0.0205888	0.0207894	0.0077391	0.0077391	0.00405345	0.000908043	0.00265439	0.0207007	0.0052023	0.0239706	0.0139609	0.0695303	0.0032544	0.00675756	0.000908043	0.00594937	0.00703131	0.0850833	0.00795129	0.0577187	0.0183952	0.0253081
Microbulbiferaceae	0.0149238	0.0303378	0.00118632	0.0177522	0.0168939	0.0164877	0.00766103	0.0392808	0.0195264	0.0136836	0.0324276	0.0136308	0.0444818	0.0375343	0.00729956	0.0446578	0.00766103	0.00447447	0.02055	0.0140099	0.00722316	0.00722316	0.0324276	0.00817238	0.00729956	0.0219945	0.00650288	0.0258145	0.0139609	0.0309023	0.0195264	0.0168939	0.00817238	0.0136836	0.00447447	0.0444754	0.0136308	0.0392808	0.0178699	0.0121699
Cellulomonadaceae	0.0319795	0.0237426	0.00355897	0.0387322	0.00337878	0.0366394	0.00957628	0.0489005	0.0156211	0.0136836	0.0162138	0.00567949	0.0321257	0.0317598	0.00265439	0.0372148	0.00957628	0.00511368	0.0203417	0.0148818	0.00412752	0.00412752	0.0162138	0.00817238	0.00265439	0.0284635	0.0299133	0.053473	0.0299162	0.0154512	0.0156211	0.00337878	0.00817238	0.0136836	0.00511368	0.0348068	0.00567949	0.0489005	0.018215	0.0158437
Methylocystaceae	0.0127918	0.0276997	0.00177949	0.0419598	0.00591286	0.0293115	0.00766103	0.059322	0.0123667	0.0124937	0.0148627	0.00567949	0.0395394	0.0404215	0.00530877	0.0279111	0.00766103	0.012145	0.0202682	0.0163511	0.00206376	0.00206376	0.0148627	0.00817238	0.00530877	0.0245821	0.0130058	0.0331901	0.0358995	0.0386279	0.0123667	0.00591286	0.00817238	0.0124937	0.012145	0.0502765	0.00567949	0.059322	0.0191192	0.0172147
Entomoplasmataceae	0.0106598	0.0237426	0.00415213	0.0242076	0.00506817	0.0183197	0.00638419	0.056917	0.00130176	0.000594937	0.00675575	0.0045436	0.0766075	0.0591887	0.00398158	0.0465186	0.00638419	0.00703131	0.0201311	0.0234369	0.00928692	0.00928692	0.00675575	0.00363217	0.00398158	0.0323449	0.0273121	0.0387218	0.023933	0.0849815	0.00130176	0.00506817	0.00363217	0.000594937	0.00703131	0.106354	0.0045436	0.056917	0.0236489	0.0306097
Aphanothecaceae	0.0127918	0.0290188	0.00237265	0.0484152	0.00591286	0.0329755	0.00446893	0.0408841	0.00130176	0.00237975	0.0121604	0.00795129	0.0444818	0.0505269	0.00265439	0.05024	0.00446893	0.00383526	0.0198245	0.0194193	0.00567534	0.00567534	0.0121604	0.00181609	0.00265439	0.0245821	0.0286127	0.0387218	0.0279218	0.0463535	0.00130176	0.00591286	0.00181609	0.00237975	0.00383526	0.0734811	0.00795129	0.0408841	0.0184298	0.020514
Blattabacteriaceae	0.0127918	0.0250617	0	0.0242076	0.00506817	0.0201517	0.00638419	0.0440907	0.00455616	0.00237975	0.0121604	0.00567949	0.0741363	0.0519706	0.00331798	0.05024	0.00638419	0.00767053	0.0197917	0.0213951	0.00722316	0.00722316	0.0121604	0.00272413	0.00331798	0.0207007	0.0143063	0.0147512	0.00598325	0.100433	0.00455616	0.00506817	0.00272413	0.00237975	0.00767053	0.0850833	0.00567949	0.0440907	0.0192264	0.0286192
Beijerinckiaceae	0.0234517	0.0263807	0.00533846	0.0338906	0.00929164	0.0293115	0.00829944	0.0424874	0.0143194	0.0154684	0.017565	0.0136308	0.0271833	0.0303162	0.00597237	0.0260504	0.00829944	0.0134234	0.0194822	0.0107663	0.0139304	0.0139304	0.017565	0.00272413	0.00597237	0.0232883	0.0143063	0.0295023	0.0279218	0.00772559	0.0143194	0.00929164	0.00272413	0.0154684	0.0134234	0.0425417	0.0136308	0.0424874	0.0172641	0.0117589
Sterolibacteriaceae	0.0170558	0.0118713	0.00415213	0.0322768	0.0261855	0.0256476	0.0140452	0.027256	0.0312423	0.0130886	0.0148627	0.0204462	0.0271833	0.0245416	0.0145991	0.0148859	0.0140452	0.0115058	0.0191606	0.00788935	0.017026	0.017026	0.0148627	0.0190689	0.0145991	0.0155255	0.0208092	0.018439	0.023933	0.0154512	0.0312423	0.0261855	0.0190689	0.0130886	0.0115058	0.027072	0.0204462	0.027256	0.0195892	0.00552348
Tissierellaceae	0.00213197	0.039571	0.00237265	0.0161384	0.00844694	0.0109918	0.00383051	0.0513055	0.0032544	0.00892406	0.0081069	0.00908719	0.0741363	0.0490833	0.00530877	0.0390756	0.00383051	0.00894895	0.0191414	0.0215219	0.00722316	0.00722316	0.0081069	0.00181609	0.00530877	0.00776277	0.0130058	0.0221267	0.0139609	0.0386279	0.0032544	0.00844694	0.00181609	0.00892406	0.00894895	0.0657462	0.00908719	0.0513055	0.0157051	0.0179054
Thermomonosporaceae	0.00426394	0.0342949	0.00296581	0.0258214	0.0160492	0.0164877	0.00829944	0.0312643	0.0136685	0.00713925	0.00945805	0.0102231	0.0543666	0.0433088	0.00331798	0.0353541	0.00829944	0.0108666	0.0186361	0.0151564	0.00825504	0.00825504	0.00945805	0.00726434	0.00331798	0.0401076	0.0169075	0.0313462	0.0259274	0.0154512	0.0136685	0.0160492	0.00726434	0.00713925	0.0108666	0.0638125	0.0102231	0.0312643	0.0181432	0.0152867
Rhodobiaceae	0.00639591	0.0342949	0.000593162	0.0193661	0.00591286	0.0146558	0.00893786	0.0352725	0.00455616	0.0101139	0.00945805	0.00795129	0.0296545	0.0476397	0.0471153	0.0353541	0.00893786	0.00767053	0.0185489	0.0153513	0.0051594	0.0051594	0.00945805	0.0118046	0.0471153	0.0168193	0.0195086	0.0165951	0.0119665	0	0.00455616	0.00591286	0.0118046	0.0101139	0.00767053	0.0522102	0.00795129	0.0352725	0.0155044	0.0146459
Anaeromyxobacteraceae	0.0213197	0.0211046	0.00118632	0.0548706	0.00844694	0.0403034	0.00829944	0.0352725	0.00260352	0.00535443	0.0081069	0.0022718	0.0370682	0.0303162	0.00199079	0.0353541	0.00829944	0.00894895	0.0183954	0.0165069	0.00361158	0.00361158	0.0081069	0.000908043	0.00199079	0.043989	0.0299133	0.0553169	0.0378939	0.0309023	0.00260352	0.00844694	0.000908043	0.00535443	0.00894895	0.0425417	0.0022718	0.0352725	0.0179218	0.0185388
Anaplasmataceae	0.00852788	0.0422091	0.00118632	0.0242076	0.00506817	0.0183197	0.00638419	0.0416857	0.00195264	0.00356962	0.0121604	0.0034077	0.0444818	0.0433088	0.00265439	0.0558223	0.00638419	0.00830974	0.0183133	0.0184837	0.00464346	0.00464346	0.0121604	0.00181609	0.00265439	0.0245821	0.0117052	0.035034	0.0378939	0.0540791	0.00195264	0.00506817	0.00181609	0.00356962	0.00830974	0.0908845	0.0034077	0.0416857	0.019217	0.0242622
Thermotogaceae	0.00639591	0.0276997	0	0.0193661	0.00422347	0.0146558	0.00191526	0.0384791	0.00195264	0.00178481	0.0054046	0.00567949	0.0815499	0.0534142	0.00398158	0.0465186	0.00191526	0.00255684	0.0176385	0.0230881	0.00361158	0.00361158	0.0054046	0	0.00398158	0.0168193	0.00780346	0.0165951	0.023933	0.0618047	0.00195264	0.00422347	0	0.00178481	0.00255684	0.0502765	0.00567949	0.0384791	0.0138065	0.0183492
Thermoactinomycetaceae	0.00426394	0.0276997	0.000593162	0.0290491	0.00506817	0.0183197	0.00255368	0.0489005	0.00390528	0.00237975	0.00135115	0.0034077	0.0494242	0.0606323	0.00132719	0.0446578	0.00255368	0.00319605	0.0171824	0.0206379	0.00670722	0.00670722	0.00135115	0.000908043	0.00132719	0.0142317	0.00780346	0.0258145	0.0279218	0.0695303	0.00390528	0.00506817	0.000908043	0.00237975	0.00319605	0.0657462	0.0034077	0.0489005	0.0164341	0.0224394
Gemmatimonadaceae	0.0149238	0.0461662	0.00355897	0.0338906	0.00675756	0.0256476	0.00766103	0.0248511	0.00130176	0.00654431	0.00945805	0.00681539	0.0345969	0.0375343	0.000663596	0.0334934	0.00766103	0.0063921	0.0171065	0.0146239	0.00154782	0.00154782	0.00945805	0.00272413	0.000663596	0.0349325	0.0208092	0.0479413	0.0458716	0.0231768	0.00130176	0.00675756	0.00272413	0.00654431	0.0063921	0.0676799	0.00681539	0.0248511	0.0173188	0.0198216
Aphanizomenonaceae	0.00852788	0.039571	0.000593162	0.0387322	0.00337878	0.0256476	0.00319209	0.0376775	0.00195264	0.00178481	0.0121604	0.0022718	0.0518954	0.0360907	0.00132719	0.0167467	0.00319209	0.00447447	0.0160676	0.0172512	0.00103188	0.00103188	0.0121604	0	0.00132719	0.0336387	0.0156069	0.0553169	0.0518548	0.0231768	0.00195264	0.00337878	0	0.00178481	0.00447447	0.0618788	0.0022718	0.0376775	0.0171424	0.0214415
Microcoleaceae	0.00639591	0.0356139	0	0.0387322	0.00422347	0.0256476	0.00255368	0.027256	0.00260352	0.00237975	0.00675575	0.0045436	0.0518954	0.0317598	0.000663596	0.0409363	0.00255368	0.00383526	0.0160194	0.0173091	0.0051594	0.0051594	0.00675575	0.000908043	0.000663596	0.0168193	0.0169075	0.0239706	0.0119665	0.0231768	0.00260352	0.00422347	0.000908043	0.00237975	0.00383526	0.0618788	0.0045436	0.027256	0.0121731	0.0151364
Saccharospirillaceae	0.0149238	0.0211046	0.00177949	0.0145246	0.0152045	0.0146558	0.00702261	0.027256	0.0136685	0.00654431	0.0378322	0.011359	0.0395394	0.023098	0.00663596	0.0204682	0.00702261	0.00319605	0.0158797	0.0108215	0.00670722	0.00670722	0.0378322	0.0108965	0.00663596	0.0103504	0.0117052	0.0129073	0.0139609	0.0309023	0.0136685	0.0152045	0.0108965	0.00654431	0.00319605	0.0193371	0.011359	0.027256	0.014226	0.00919541
Acidithiobacillaceae	0.00426394	0.0263807	0.000593162	0.0161384	0.0118257	0.0109918	0.027452	0.0280577	0.00846145	0.0047595	0.00945805	0.0034077	0.0345969	0.0332034	0.00663596	0.0241896	0.027452	0.00255684	0.0155792	0.0116106	0.00412752	0.00412752	0.00945805	0.020885	0.00663596	0.0284635	0.00780346	0.0110634	0.0159553	0.0154512	0.00846145	0.0118257	0.020885	0.0047595	0.00255684	0.0367405	0.0034077	0.0280577	0.0133703	0.00999495
Spongiibacteraceae	0.0106598	0.0237426	0.00237265	0.0209799	0.0177386	0.0164877	0.00957628	0.0216445	0.0136685	0.00594937	0.0418857	0.0045436	0.0172985	0.0259853	0.00199079	0.0279111	0.00957628	0.00383526	0.0153248	0.0105821	0.00877098	0.00877098	0.0418857	0.0163448	0.00199079	0.00905656	0.0156069	0.0165951	0.0179497	0.0309023	0.0136685	0.0177386	0.0163448	0.00594937	0.00383526	0.0212708	0.0045436	0.0216445	0.0151594	0.00994488
Nautiliaceae	0.00639591	0.0316568	0.00533846	0.0242076	0.00337878	0.0164877	0.00510735	0.0304626	0.000650881	0.00297469	0.00675575	0.0045436	0.0420106	0.0418652	0.00265439	0.0334934	0.00510735	0.00447447	0.0148648	0.0147243	0.0051594	0.0051594	0.00675575	0.00181609	0.00265439	0.0245821	0.0130058	0.0239706	0.0299162	0.0540791	0.000650881	0.00337878	0.00181609	0.00297469	0.00447447	0.0773485	0.0045436	0.0304626	0.0162638	0.0209916
Pelagibacteraceae	0.00639591	0.0145094	0.00237265	0.0355045	0.00422347	0.0238156	0.00127684	0.0288593	0.00195264	0.00178481	0.00945805	0.00567949	0.0543666	0.0317598	0.00398158	0.0353541	0.00127684	0.00255684	0.0147294	0.0160862	0.00412752	0.00412752	0.00945805	0.000908043	0.00398158	0.0258759	0.0169075	0.0221267	0.0199442	0.0463535	0.00195264	0.00422347	0.000908043	0.00178481	0.00255684	0.0696136	0.00567949	0.0288593	0.014966	0.0185398
Candidatus Nanopelagicaceae	0.00426394	0.0329759	0.00296581	0.0274353	0.00253408	0.0183197	0.00255368	0.0392808	0	0.00118987	0.0027023	0	0.0395394	0.0418652	0.00199079	0.0372148	0.00255368	0.00767053	0.0147253	0.0165114	0.00361158	0.00361158	0.0027023	0.00181609	0.00199079	0.0103504	0.0117052	0.0110634	0.00797766	0.0695303	0	0.00253408	0.00181609	0.00118987	0.00767053	0.0580114	0	0.0392808	0.0130479	0.0206071
Syntrophaceae	0.0106598	0.036933	0.00237265	0.00645536	0.00760225	0.00915986	0.000638419	0.0456939	0.0032544	0.00297469	0	0.0124949	0.0345969	0.046196	0.00464517	0.0353541	0.000638419	0.00511368	0.0147102	0.0165647	0.00567534	0.00567534	0	0.000908043	0.00464517	0.0103504	0.0104046	0.018439	0.0139609	0.0309023	0.0032544	0.00760225	0.000908043	0.00297469	0.00511368	0.0638125	0.0124949	0.0456939	0.0134897	0.0170412
Persicobacteraceae	0.00426394	0.039571	0	0.0080692	0	0.00732789	0.00638419	0.0440907	0.00130176	0.00237975	0.00405345	0.0022718	0.0617803	0.034647	0.00331798	0.0353541	0.00638419	0.00191763	0.0146175	0.0190866	0.0025797	0.0025797	0.00405345	0.00181609	0.00331798	0.0103504	0.0052023	0.00737558	0.00598325	0.0231768	0.00130176	0	0.00181609	0.00237975	0.00191763	0.0541439	0.0022718	0.0440907	0.00968649	0.0153618
Petrotogaceae	0.00639591	0.0237426	0.00177949	0.0177522	0.00506817	0.0128238	0.00446893	0.0448923	0.000650881	0.00237975	0.0081069	0.0124949	0.0444818	0.0259853	0.00199079	0.0409363	0.00446893	0.00383526	0.0145697	0.0151921	0.00206376	0.00206376	0.0081069	0.00363217	0.00199079	0.0103504	0.00390173	0.00921948	0.0179497	0.0463535	0.000650881	0.00506817	0.00363217	0.00237975	0.00383526	0.0773485	0.0124949	0.0448923	0.0142186	0.0207853
Bdellovibrionaceae	0.0127918	0.0408901	0.00177949	0.0112969	0.000844694	0.0128238	0.00446893	0.0384791	0.00195264	0.00178481	0.00405345	0.00567949	0.0420106	0.034647	0.00265439	0.0390756	0.00446893	0.00191763	0.0145344	0.0161032	0.00309564	0.00309564	0.00405345	0.0172528	0.00265439	0.0155255	0.00780346	0.0129073	0.023933	0.0231768	0.00195264	0.000844694	0.0172528	0.00178481	0.00191763	0.0618788	0.00567949	0.0384791	0.013516	0.0158698
Halieaceae	0.0149238	0.0250617	0	0.0129107	0.00760225	0.0146558	0.000638419	0.029661	0.00520705	0.00237975	0.0391834	0.0011359	0.0345969	0.034647	0.00331798	0.0297719	0.000638419	0.00319605	0.0144182	0.0139391	0.0025797	0.0025797	0.0391834	0.00454021	0.00331798	0.00517518	0.0130058	0.00921948	0.00997208	0.0618047	0.00520705	0.00760225	0.00454021	0.00237975	0.00319605	0.0522102	0.0011359	0.029661	0.014295	0.0185196
Haliscomenobacteraceae	0.00852788	0.0408901	0.000593162	0.0290491	0.00253408	0.0201517	0.00766103	0.0288593	0.00520705	0.00416456	0.0054046	0.0022718	0.0321257	0.0303162	0.000663596	0.0260504	0.00766103	0.0063921	0.0143624	0.0132588	0.00412752	0.00412752	0.0054046	0.0063563	0.000663596	0.0271697	0.00910403	0.0295023	0.0299162	0.0540791	0.00520705	0.00253408	0.0063563	0.00416456	0.0063921	0.0522102	0.0022718	0.0288593	0.0154692	0.0171564
Budviciaceae	0.00852788	0.0197855	0.00355897	0.0112969	0.0152045	0.0109918	0.00383051	0.027256	0.0130176	0.00594937	0.0189161	0.0147667	0.0222409	0.0375343	0.00331798	0.0334934	0.00383051	0.00255684	0.0142264	0.0105975	0.00877098	0.00877098	0.0189161	0.00817238	0.00331798	0.00905656	0.00910403	0.0147512	0.00598325	0.0463535	0.0130176	0.0152045	0.00817238	0.00594937	0.00255684	0.0483428	0.0147667	0.027256	0.0149146	0.0131948
Rhodocyclaceae	0.0127918	0.0184665	0	0.0161384	0.0118257	0.0146558	0.0140452	0.0224461	0.00911233	0.0107089	0.0162138	0.0124949	0.0123561	0.0129926	0.00464517	0.0297719	0.0140452	0.0127842	0.0136386	0.00632212	0.00722316	0.00722316	0.0162138	0.0245171	0.00464517	0.00388138	0.0182081	0.00737558	0.0139609	0.0540791	0.00911233	0.0118257	0.0245171	0.0107089	0.0127842	0.0348068	0.0124949	0.0224461	0.0164458	0.0124039
Hahellaceae	0.00213197	0.0171475	0	0.0129107	0.00760225	0.00915986	0.0134068	0.0248511	0.0149703	0.00594937	0.0243207	0.00908719	0.0148273	0.0332034	0.00464517	0.0279111	0.0134068	0.00894895	0.0135822	0.00907491	0.0103188	0.0103188	0.0243207	0.0154367	0.00464517	0.0155255	0.0117052	0.0165951	0.00997208	0.0231768	0.0149703	0.00760225	0.0154367	0.00594937	0.00894895	0.027072	0.00908719	0.0248511	0.0142185	0.00679153
Desulfomicrobiaceae	0.0106598	0.0263807	0.00237265	0.0177522	0.00337878	0.0146558	0.00574577	0.029661	0.00130176	0.0047595	0	0.0022718	0.0345969	0.0360907	0.00265439	0.0353541	0.00574577	0.00127842	0.0130367	0.0133521	0.00361158	0.00361158	0	0.000908043	0.00265439	0.0219945	0.0260115	0.00921948	0.0119665	0.0386279	0.00130176	0.00337878	0.000908043	0.0047595	0.00127842	0.0464091	0.0022718	0.029661	0.0115874	0.014501
Clostridiales Family XVII. Incertae Sedis	0.0106598	0.0263807	0.00118632	0.0242076	0.000844694	0.0183197	0.00127684	0.0352725	0	0.00356962	0.00135115	0.0022718	0.0420106	0.0245416	0	0.0372148	0.00127684	0.00255684	0.0129412	0.0148415	0.00154782	0.00154782	0.00135115	0	0	0.00905656	0.0234104	0.018439	0.0159553	0.0154512	0	0.000844694	0	0.00356962	0.00255684	0.0483428	0.0022718	0.0352725	0.00997875	0.0138987
Isosphaeraceae	0.00213197	0.0184665	0.00177949	0.030663	0.00253408	0.0183197	0.00127684	0.0376775	0.0032544	0.00118987	0.00675575	0.0034077	0.0296545	0.0418652	0.00199079	0.0241896	0.00127684	0.00575289	0.0128993	0.0141053	0.00154782	0.00154782	0.00675575	0.00363217	0.00199079	0.0155255	0.0156069	0.0331901	0.047866	0.0540791	0.0032544	0.00253408	0.00363217	0.00118987	0.00575289	0.0425417	0.0034077	0.0376775	0.0156518	0.0184161
Verrucomicrobiaceae	0.00639591	0.0263807	0	0.030663	0.0143598	0.0201517	0.00191526	0.027256	0.00650881	0.00178481	0.00405345	0.00795129	0.0197697	0.0303162	0.00265439	0.0279111	0.00191526	0	0.0127771	0.0116876	0.0051594	0.0051594	0.00405345	0.00363217	0.00265439	0.0232883	0.0195086	0.0202829	0.0199442	0.0386279	0.00650881	0.0143598	0.00363217	0.00178481	0	0.040608	0.00795129	0.027256	0.0135784	0.0126386
Sinobacteraceae	0.00639591	0.0197855	0.00118632	0.0177522	0.0101363	0.0128238	0.0102147	0.0200412	0.0143194	0.0124937	0.0121604	0.00795129	0.0172985	0.0187671	0.00597237	0.0204682	0.0102147	0.0115058	0.0127493	0.00548431	0.00980286	0.00980286	0.0121604	0.0127126	0.00597237	0.0168193	0.0104046	0.0221267	0.023933	0.0231768	0.0143194	0.0101363	0.0127126	0.0124937	0.0115058	0.027072	0.00795129	0.0200412	0.0146191	0.00612013
Chlamydiaceae	0.00639591	0.0263807	0.00177949	0.0080692	0.000844694	0.00732789	0.00638419	0.0280577	0.00260352	0.00118987	0.00405345	0.0034077	0.0345969	0.0433088	0.00132719	0.0390756	0.00638419	0.0063921	0.0126433	0.0144085	0.00361158	0.00361158	0.00405345	0.000908043	0.00132719	0.0116442	0.0130058	0.0110634	0.0139609	0.0540791	0.00260352	0.000844694	0.000908043	0.00118987	0.0063921	0.0541439	0.0034077	0.0280577	0.011934	0.0168193
Kangiellaceae	0.00639591	0.0211046	0.00237265	0.00645536	0.00675756	0.00732789	0.00383051	0.0264544	0.00455616	0.00237975	0.0351299	0.0011359	0.0345969	0.0317598	0.00132719	0.0297719	0.00383051	0.00191763	0.0126169	0.0129616	0.00825504	0.00825504	0.0351299	0.00363217	0.00132719	0.0116442	0.0104046	0.0147512	0.0139609	0.0154512	0.00455616	0.00675756	0.00363217	0.00237975	0.00191763	0.0386742	0.0011359	0.0264544	0.0115733	0.0112597
Salinivirgaceae	0	0.0237426	0	0.0112969	0	0.0128238	0.00446893	0.0328676	0.00195264	0.00535443	0.0121604	0.0022718	0.0395394	0.0332034	0.000663596	0.0372148	0.00446893	0.00447447	0.0125835	0.0141058	0.0025797	0.0025797	0.0121604	0.00454021	0.000663596	0.0103504	0.00780346	0.0129073	0.00997208	0.0618047	0.00195264	0	0.00454021	0.00535443	0.00447447	0.0522102	0.0022718	0.0328676	0.012724	0.0178332
Dehalococcoidaceae	0.00426394	0.0250617	0.00177949	0.0161384	0.00337878	0.0109918	0.00191526	0.0320659	0.00195264	0.000594937	0.0027023	0	0.0420106	0.0418652	0.00398158	0.0316326	0.00191526	0.00383526	0.0125603	0.0149474	0.00309564	0.00309564	0.0027023	0.00363217	0.00398158	0.0103504	0.00910403	0.00921948	0.00997208	0.0154512	0.00195264	0.00337878	0.00363217	0.000594937	0.00383526	0.0386742	0	0.0320659	0.00859658	0.0105883
Acidiferrobacteraceae	0.00426394	0.0250617	0	0.0080692	0.0168939	0.00732789	0.00766103	0.0216445	0.0117159	0.00297469	0.0081069	0.00681539	0.0444818	0.0303162	0.00398158	0.0130252	0.00766103	0.00575289	0.0125419	0.011323	0.00722316	0.00722316	0.0081069	0.00272413	0.00398158	0.0168193	0.0143063	0.0202829	0.0179497	0	0.0117159	0.0168939	0.00272413	0.00297469	0.00575289	0.0425417	0.00681539	0.0216445	0.0116489	0.0102001
Leptolyngbyaceae	0.00426394	0.0422091	0.000593162	0.0161384	0.00253408	0.0109918	0.00127684	0.0312643	0.00390528	0.000594937	0.0108092	0.0022718	0.0197697	0.0404215	0.00199079	0.0279111	0.00127684	0.00575289	0.0124431	0.0140588	0.00051594	0.00051594	0.0108092	0.00272413	0.00199079	0.00776277	0.00650288	0.00737558	0.0159553	0.0309023	0.00390528	0.00253408	0.00272413	0.000594937	0.00575289	0.0522102	0.0022718	0.0312643	0.0103507	0.0140123
Azonexaceae	0.0170558	0.0197855	0.00118632	0.00322768	0.019428	0.00915986	0.0165989	0.0184379	0.0156211	0.0124937	0.0121604	0.00908719	0.0197697	0.0129926	0.00265439	0.0111645	0.0165989	0.0063921	0.0124341	0.00607001	0.0103188	0.0103188	0.0121604	0.0154367	0.00265439	0.0129379	0.0117052	0.018439	0.0179497	0.0154512	0.0156211	0.019428	0.0154367	0.0124937	0.0063921	0.0232045	0.00908719	0.0184379	0.0137485	0.00501057
Idiomarinaceae	0.0277156	0.0184665	0.00118632	0.00484152	0.00591286	0.0146558	0.0134068	0.0176363	0.00455616	0.00654431	0.0337788	0.0034077	0.0148273	0.023098	0.00331798	0.00930371	0.0134068	0.00063921	0.012039	0.00943389	0.00412752	0.00412752	0.0337788	0.00998847	0.00331798	0.0116442	0.0208092	0.0110634	0.00598325	0.0154512	0.00455616	0.00591286	0.00998847	0.00654431	0.00063921	0.040608	0.0034077	0.0176363	0.0116436	0.0107962
Gemmataceae	0.00639591	0.00791421	0.00118632	0.0387322	0.00168939	0.0256476	0.00127684	0.0192396	0.00520705	0.00594937	0.00405345	0.0045436	0.0296545	0.0303162	0.000663596	0.0241896	0.00127684	0.00319605	0.0117296	0.0125007	0.00051594	0.00051594	0.00405345	0.00272413	0.000663596	0.0245821	0.0156069	0.0221267	0.0458716	0.00772559	0.00520705	0.00168939	0.00272413	0.00594937	0.00319605	0.0290057	0.0045436	0.0192396	0.0108856	0.012622
Heliobacteriaceae	0.00213197	0.0316568	0.000593162	0.00645536	0	0.00549591	0.00127684	0.0320659	0	0.00178481	0.00135115	0.0011359	0.0296545	0.0519706	0.000663596	0.0409363	0.00127684	0.00127842	0.0116516	0.0170315	0.00103188	0.00103188	0.00135115	0	0.000663596	0.0129379	0.0117052	0.00737558	0.00797766	0.0231768	0	0	0	0.00178481	0.00127842	0.0309394	0.0011359	0.0320659	0.00746978	0.0107134
Roseiflexaceae	0.00852788	0.0197855	0	0.0274353	0	0.0201517	0.00255368	0.0224461	0.00130176	0.00178481	0.0054046	0.0022718	0.0370682	0.0288725	0.00132719	0.0260504	0.00255368	0.00127842	0.0116008	0.0124768	0.00154782	0.00154782	0.0054046	0.00363217	0.00132719	0.00646897	0.0104046	0.018439	0.00997208	0.0231768	0.00130176	0	0.00363217	0.00178481	0.00127842	0.0309394	0.0022718	0.0224461	0.00808753	0.00934394
Microcystaceae	0.00639591	0.0211046	0	0.0129107	0.00506817	0.0109918	0.00446893	0.0232478	0.00585793	0.0047595	0.0027023	0.0102231	0.046953	0.0259853	0.00265439	0.0167467	0.00446893	0.00063921	0.0113988	0.0118263	0.00309564	0.00309564	0.0027023	0.00363217	0.00265439	0.0142317	0.0130058	0.0147512	0.00797766	0.0386279	0.00585793	0.00506817	0.00363217	0.0047595	0.00063921	0.0290057	0.0102231	0.0232478	0.0103449	0.0104262
Symbiobacteriaceae	0.00213197	0.0290188	0.000593162	0.0193661	0.000844694	0.0128238	0	0.0288593	0.00455616	0.00118987	0.0027023	0.0022718	0.0345969	0.0332034	0.00132719	0.0297719	0	0.00127842	0.0113631	0.0135467	0.00206376	0.00206376	0.0027023	0	0.00132719	0.0142317	0.00780346	0.0165951	0.00797766	0.0540791	0.00455616	0.000844694	0	0.00118987	0.00127842	0.0348068	0.0022718	0.0288593	0.0101473	0.0148824
Granulosicoccaceae	0.00426394	0.0131903	0.00118632	0.0080692	0.0101363	0.00732789	0.0146836	0.0128264	0.0123667	0.00535443	0.017565	0.011359	0.0172985	0.0158799	0.00398158	0.0260504	0.0146836	0.00575289	0.0112209	0.00614842	0.00722316	0.00722316	0.017565	0.0163448	0.00398158	0.0129379	0.00780346	0.0165951	0.0119665	0.00772559	0.0123667	0.0101363	0.0163448	0.00535443	0.00575289	0.0251383	0.011359	0.0128264	0.0115914	0.00539079
Gottschalkiaceae	0	0.0211046	0.00177949	0.00484152	0.00929164	0.00549591	0.00383051	0.0232478	0.000650881	0.00416456	0.0027023	0.0124949	0.0444818	0.0259853	0.00331798	0.0279111	0.00383051	0.0063921	0.0111957	0.0122909	0.00722316	0.00722316	0.0027023	0.00363217	0.00331798	0.00258759	0.00780346	0.0147512	0.00797766	0.0772559	0.000650881	0.00929164	0.00363217	0.00416456	0.0063921	0.0328731	0.0124949	0.0232478	0.0126234	0.0180199
Ferrimonadaceae	0.00852788	0.0145094	0.00237265	0.00484152	0.00844694	0.00732789	0.0217062	0.0152313	0.0149703	0.00416456	0.00675575	0.0011359	0.0247121	0.0216544	0.00597237	0.0167467	0.0217062	0.00063921	0.0111901	0.00783009	0.00980286	0.00980286	0.00675575	0.00998847	0.00597237	0.00388138	0.0143063	0.00368779	0.00398883	0.00772559	0.0149703	0.00844694	0.00998847	0.00416456	0.00063921	0.0290057	0.0011359	0.0152313	0.00886081	0.00667103
Crocinitomicaceae	0.0127918	0.0237426	0	0.00968304	0	0.0109918	0.00510735	0.0224461	0.00195264	0.00594937	0.0243207	0.00567949	0.0222409	0.0274289	0.00132719	0.0186074	0.00510735	0.00319605	0.0111429	0.00949033	0.00051594	0.00051594	0.0243207	0.00181609	0.00132719	0.0103504	0.0052023	0.00737558	0.00398883	0.0309023	0.00195264	0	0.00181609	0.00594937	0.00319605	0.027072	0.00567949	0.0224461	0.00857928	0.0101558
Jiangellaceae	0.00852788	0.0211046	0.00177949	0.0161384	0.00506817	0.0128238	0.00638419	0.0256527	0.00715969	0.00832912	0.00945805	0	0.0222409	0.0187671	0.00464517	0.0167467	0.00638419	0.00767053	0.0110489	0.00740373	0.00309564	0.00309564	0.00945805	0.00998847	0.00464517	0.0142317	0.0169075	0.0276584	0.0299162	0.0154512	0.00715969	0.00506817	0.00998847	0.00832912	0.00767053	0.0193371	0	0.0256527	0.0120919	0.00881894
Sporolactobacillaceae	0.00213197	0.0237426	0.000593162	0.0161384	0.000844694	0.0109918	0.00255368	0.0200412	0.00130176	0.00118987	0.00405345	0	0.046953	0.0317598	0	0.0316326	0.00255368	0.00127842	0.0109867	0.0141995	0.00154782	0.00154782	0.00405345	0	0	0.0103504	0.00390173	0.0147512	0.0139609	0.0386279	0.00130176	0.000844694	0	0.00118987	0.00127842	0.0541439	0	0.0200412	0.00930784	0.0150048
Chloroflexaceae	0.00213197	0.0184665	0.000593162	0.0161384	0.00844694	0.0109918	0.0146836	0.016033	0.00520705	0.00237975	0.00675575	0.0034077	0.0321257	0.011549	0.00663596	0.0241896	0.0146836	0.00319605	0.0109786	0.00844397	0.0051594	0.0051594	0.00675575	0.0136206	0.00663596	0.00905656	0.0052023	0.00737558	0.00598325	0.0231768	0.00520705	0.00844694	0.0136206	0.00237975	0.00319605	0.027072	0.0034077	0.016033	0.00930493	0.00689346
Geodermatophilaceae	0.00426394	0.0197855	0.0047453	0.0258214	0.00422347	0.0164877	0.00510735	0.013628	0.00846145	0.00416456	0.0108092	0.0034077	0.0172985	0.0245416	0.00331798	0.0111645	0.00510735	0.0134234	0.0108755	0.00740538	0.00412752	0.00412752	0.0108092	0	0.00331798	0.0232883	0.0117052	0.0221267	0.0339051	0.00772559	0.00846145	0.00422347	0	0.00416456	0.0134234	0.0328731	0.0034077	0.013628	0.0111842	0.0104418
Cryomorphaceae	0.00426394	0.0316568	0.00237265	0.0080692	0.00253408	0.00732789	0.00383051	0.0256527	0	0.00535443	0.0108092	0.0022718	0.0321257	0.0274289	0.00132719	0.0223289	0.00383051	0.00383526	0.0108344	0.0113132	0.00154782	0.00154782	0.0108092	0.0063563	0.00132719	0	0.00780346	0.00737558	0.00598325	0.0309023	0	0.00253408	0.0063563	0.00535443	0.00383526	0.0251383	0.0022718	0.0256527	0.00804421	0.00936336
Sutterellaceae	0.00852788	0.0197855	0.000593162	0.0209799	0.00760225	0.0164877	0.00319209	0.0176363	0.00650881	0.00297469	0.0054046	0.00567949	0.0271833	0.023098	0	0.0223289	0.00319209	0.00255684	0.0107629	0.00898004	0.00361158	0.00361158	0.0054046	0.00272413	0	0.0168193	0.0156069	0.0129073	0.0299162	0.00772559	0.00650881	0.00760225	0.00272413	0.00297469	0.00255684	0.0232045	0.00567949	0.0176363	0.00928968	0.00826684
Thermodesulfobacteriaceae	0.00213197	0.0158284	0.000593162	0.0145246	0.00253408	0.00915986	0.00191526	0.0256527	0.00130176	0.00118987	0	0.00567949	0.0345969	0.0404215	0.00331798	0.0297719	0.00191526	0.00127842	0.0106563	0.0131582	0.00103188	0.00103188	0	0	0.00331798	0.00905656	0.00390173	0.0147512	0.0139609	0.0386279	0.00130176	0.00253408	0	0.00118987	0.00127842	0.0444754	0.00567949	0.0256527	0.00932177	0.0135699
Dietziaceae	0.0106598	0.0211046	0.00296581	0.0177522	0.00422347	0.0146558	0.00574577	0.0264544	0.00260352	0.00237975	0.0108092	0.0022718	0.0197697	0.0173235	0	0.0148859	0.00574577	0.00958816	0.0104966	0.00781082	0.00361158	0.00361158	0.0108092	0.00454021	0	0.0271697	0.0156069	0.0239706	0.0339051	0	0.00260352	0.00422347	0.00454021	0.00237975	0.00958816	0.0251383	0.0022718	0.0264544	0.0111347	0.0111607
Aquificaceae	0.00426394	0.0263807	0.00177949	0.0080692	0.00168939	0.00732789	0.00319209	0.0304626	0	0.00118987	0	0.0034077	0.0296545	0.0288725	0.00265439	0.0279111	0.00319209	0.00255684	0.0101447	0.0120135	0	0	0	0.000908043	0.00265439	0.00646897	0.00650288	0.0202829	0.00997208	0.0463535	0	0.00168939	0.000908043	0.00118987	0.00255684	0.0425417	0.0034077	0.0304626	0.00977216	0.0149383
Nakamurellaceae	0.00426394	0.0197855	0	0.0193661	0.00591286	0.0128238	0.00383051	0.0184379	0.00585793	0.00297469	0.0148627	0.0034077	0.0222409	0.0144363	0.00331798	0.0241896	0.00383051	0.00255684	0.0101164	0.00801716	0.00206376	0.00206376	0.0148627	0.000908043	0.00331798	0.0168193	0.00780346	0.0147512	0.0219386	0.00772559	0.00585793	0.00591286	0.000908043	0.00297469	0.00255684	0.0251383	0.0034077	0.0184379	0.00874714	0.00780415
Hydrogenothermaceae	0.00213197	0.038252	0.000593162	0.0112969	0	0.00732789	0.00127684	0.0264544	0.000650881	0.000594937	0.0027023	0.0011359	0.0321257	0.0332034	0.000663596	0.0204682	0.00127684	0.00063921	0.0100441	0.0135045	0.00309564	0.00309564	0.0027023	0	0.000663596	0.00646897	0.00910403	0.00737558	0.00598325	0.0463535	0.000650881	0	0	0.000594937	0.00063921	0.0309394	0.0011359	0.0264544	0.00806985	0.0130109
Syntrophobacteraceae	0.00639591	0.0158284	0.00118632	0.0225938	0	0.0164877	0.000638419	0.0208429	0.000650881	0.000594937	0.00135115	0	0.0444818	0.0259853	0.00132719	0.0204682	0.000638419	0.00127842	0.0100416	0.0127745	0.00103188	0.00103188	0.00135115	0	0.00132719	0.0116442	0.0143063	0.0110634	0.0119665	0.0231768	0.000650881	0	0	0.000594937	0.00127842	0.0251383	0	0.0208429	0.00696692	0.0088909
Kofleriaceae	0.0106598	0.0131903	0.00237265	0.0193661	0.00760225	0.0164877	0.00127684	0.0208429	0.00520705	0.00416456	0.0054046	0.0045436	0.0172985	0.0173235	0.00530877	0.0186074	0.00127684	0.00958816	0.010029	0.00679608	0.00412752	0.00412752	0.0054046	0.00272413	0.00530877	0.0207007	0.0130058	0.0165951	0.0299162	0	0.00520705	0.00760225	0.00272413	0.00416456	0.00958816	0.0232045	0.0045436	0.0208429	0.00998819	0.00863068
Halobacteroidaceae	0.00426394	0.0145094	0.00177949	0.00968304	0.000844694	0.00732789	0	0.0248511	0.00130176	0.00297469	0.0054046	0.0011359	0.0247121	0.0404215	0.00331798	0.0334934	0	0.00127842	0.00984999	0.0125354	0.00619128	0.00619128	0.0054046	0.000908043	0.00331798	0.00905656	0.00130058	0.0147512	0.00398883	0.0618047	0.00130176	0.000844694	0.000908043	0.00297469	0.00127842	0.0483428	0.0011359	0.0248511	0.0108085	0.0173571
Amoebophilaceae	0	0.0211046	0.00237265	0.0112969	0	0.0128238	0.00191526	0.0304626	0	0.00237975	0.0027023	0.0022718	0.0296545	0.0288725	0.00132719	0.0241896	0.00191526	0.00127842	0.00969818	0.0116445	0.00206376	0.00206376	0.0027023	0.00181609	0.00132719	0.00517518	0.00130058	0.0129073	0.00797766	0.0309023	0	0	0.00181609	0.00237975	0.00127842	0.0328731	0.0022718	0.0304626	0.00773988	0.0113257
Tsukamurellaceae	0.00213197	0.00923324	0.00296581	0.0258214	0.00929164	0.0164877	0.00191526	0.0208429	0.00585793	0.00594937	0.0054046	0.0011359	0.0172985	0.0202108	0.000663596	0.0241896	0.00191526	0.00319605	0.00969509	0.00866736	0.00464346	0.00464346	0.0054046	0.00363217	0.000663596	0.0129379	0.0143063	0.0202829	0.00997208	0.0231768	0.00585793	0.00929164	0.00363217	0.00594937	0.00319605	0.0212708	0.0011359	0.0208429	0.00949111	0.00748402
Halobacteriovoraceae	0.00213197	0.0263807	0.00177949	0.0129107	0.00168939	0.00915986	0.000638419	0.0224461	0.00195264	0.000594937	0.0054046	0.0011359	0.0296545	0.0259853	0.00132719	0.0297719	0.000638419	0.00063921	0.00968007	0.0115119	0	0	0.0054046	0.00363217	0.00132719	0.00388138	0.00650288	0.00921948	0	0.0618047	0.00195264	0.00168939	0.00363217	0.000594937	0.00063921	0.027072	0.0011359	0.0224461	0.00838527	0.015338
Cohaesibacteraceae	0.00213197	0.0197855	0.000593162	0.00645536	0.00337878	0.00549591	0.00383051	0.0264544	0.00585793	0.0047595	0.00945805	0.0011359	0.0321257	0.0202108	0.00331798	0.0204682	0.00383051	0.00319605	0.00958257	0.00965401	0.00206376	0.00206376	0.00945805	0.00181609	0.00331798	0.00905656	0.0117052	0.0147512	0.0219386	0.0309023	0.00585793	0.00337878	0.00181609	0.0047595	0.00319605	0.013536	0.0011359	0.0264544	0.00928934	0.00906888
Syntrophomonadaceae	0.00213197	0.0171475	0.00118632	0.00968304	0.00253408	0.00732789	0.00191526	0.0224461	0	0.00178481	0.00135115	0.0011359	0.0345969	0.0332034	0.00199079	0.0297719	0.00191526	0.00191763	0.00955777	0.0121762	0.00206376	0.00206376	0.00135115	0.00272413	0.00199079	0.00517518	0.00130058	0.0129073	0.00997208	0.0463535	0	0.00253408	0.00272413	0.00178481	0.00191763	0.0483428	0.0011359	0.0224461	0.00926598	0.014916
Dermacoccaceae	0.00639591	0.0158284	0.00118632	0.0225938	0.00253408	0.0164877	0.00191526	0.0232478	0.00260352	0.00416456	0.0027023	0.0022718	0.0296545	0.0144363	0	0.0186074	0.00191526	0.00127842	0.00932352	0.00950834	0.00206376	0.00206376	0.0027023	0.000908043	0	0.0168193	0.00780346	0.0202829	0.0119665	0.0154512	0.00260352	0.00253408	0.000908043	0.00416456	0.00127842	0.0174034	0.0022718	0.0232478	0.00747071	0.00778631
Bernardetiaceae	0.00426394	0.0145094	0.00118632	0.0177522	0	0.0128238	0.00446893	0.0232478	0.00130176	0.00535443	0.0027023	0.00567949	0.0197697	0.023098	0.00132719	0.0223289	0.00446893	0.00319605	0.0093044	0.00852902	0.00154782	0.00154782	0.0027023	0.00908043	0.00132719	0.00905656	0.0104046	0.0165951	0.00598325	0.0231768	0.00130176	0	0.00908043	0.00535443	0.00319605	0.0580114	0.00567949	0.0232478	0.0104052	0.0138207
Gloeobacteraceae	0	0.0118713	0	0.0161384	0.00337878	0.0183197	0.0108531	0.0248511	0.00130176	0.000594937	0.00405345	0.0022718	0.0271833	0.0187671	0.00331798	0.00930371	0.0108531	0.00127842	0.00912989	0.00879557	0.00103188	0.00103188	0.00405345	0.00998847	0.00331798	0.00388138	0.00780346	0.00737558	0.0159553	0.0154512	0.00130176	0.00337878	0.00998847	0.000594937	0.00127842	0.027072	0.0022718	0.0248511	0.00781266	0.00813428
Orbaceae	0.00213197	0.0184665	0.00177949	0.0177522	0.000844694	0.0109918	0.00191526	0.0248511	0.000650881	0.00118987	0.0148627	0	0.0296545	0.0216544	0.00132719	0.0130252	0.00191526	0.00127842	0.0091273	0.00986636	0.00309564	0.00309564	0.0148627	0.000908043	0.00132719	0.00905656	0.00390173	0.0165951	0.00797766	0	0.000650881	0.000844694	0.000908043	0.00118987	0.00127842	0.0444754	0	0.0248511	0.00750103	0.0115474
Sandaracinaceae	0.00852788	0.0211046	0.00118632	0.0177522	0.00591286	0.0146558	0.00574577	0.00961978	0.00650881	0.00654431	0	0.00681539	0.0247121	0.011549	0.00199079	0.00930371	0.00574577	0.00511368	0.00904382	0.00670008	0.00464346	0.00464346	0	0.00272413	0.00199079	0.0258759	0.00780346	0.0129073	0.0179497	0.0154512	0.00650881	0.00591286	0.00272413	0.00654431	0.00511368	0.0232045	0.00681539	0.00961978	0.00891294	0.00733136
Solibacteraceae	0.00426394	0.0105523	0.00177949	0.0080692	0.00422347	0.00732789	0.00702261	0.0144297	0.00911233	0.00356962	0.00675575	0.00908719	0.0172985	0.0173235	0.00464517	0.0241896	0.00702261	0.00255684	0.00884609	0.00596176	0.00412752	0.00412752	0.00675575	0.0063563	0.00464517	0.0142317	0.0143063	0.0129073	0.0199442	0.0154512	0.00911233	0.00422347	0.0063563	0.00356962	0.00255684	0.0290057	0.00908719	0.0144297	0.0100663	0.00694825
Bradymonadaceae	0.00852788	0.0158284	0.000593162	0.0145246	0.00506817	0.0128238	0.00319209	0.0232478	0.00650881	0.00237975	0.00405345	0.0034077	0.0197697	0.0245416	0.000663596	0.00930371	0.00319209	0.00063921	0.00879253	0.00786134	0.0025797	0.0025797	0.00405345	0	0.000663596	0.0168193	0.0143063	0.0276584	0.0219386	0.0309023	0.00650881	0.00506817	0	0.00237975	0.00063921	0.0464091	0.0034077	0.0232478	0.0116201	0.013435
Mariprofundaceae	0.00639591	0.0263807	0.000593162	0.00645536	0.00168939	0.00732789	0.00127684	0.0256527	0.000650881	0.00178481	0.00675575	0.0022718	0.0247121	0.0187671	0	0.0223289	0.00127684	0.00127842	0.00864437	0.00990904	0	0	0.00675575	0.00272413	0	0.00905656	0.00390173	0.0202829	0.00398883	0.0154512	0.000650881	0.00168939	0.00272413	0.00178481	0.00127842	0.0425417	0.0022718	0.0256527	0.00781972	0.0113868
Ardenticatenaceae	0.00426394	0.0131903	0.00118632	0.0225938	0.00506817	0.0146558	0.000638419	0.0168346	0.0032544	0.00297469	0.00135115	0.0045436	0.00988484	0.0303162	0.00265439	0.0130252	0.000638419	0.00703131	0.00856142	0.00838142	0.00412752	0.00412752	0.00135115	0.00181609	0.00265439	0.0168193	0.0130058	0.0165951	0.0159553	0.0154512	0.0032544	0.00506817	0.00181609	0.00297469	0.00703131	0.0116023	0.0045436	0.0168346	0.00805714	0.00611171
Clostridiales Family XVI. Incertae Sedis	0.00639591	0.0184665	0.000593162	0.00484152	0.000844694	0.00549591	0.00127684	0.0192396	0	0	0.0027023	0	0.0296545	0.0360907	0.00132719	0.0241896	0.00127684	0.00127842	0.00853743	0.0115703	0.00154782	0.00154782	0.0027023	0.000908043	0.00132719	0.00388138	0.0052023	0.0110634	0.00199442	0.0154512	0	0.000844694	0.000908043	0	0.00127842	0.0502765	0	0.0192396	0.00656517	0.0122406
Kosmotogaceae	0	0.0184665	0.000593162	0.0112969	0.000844694	0.0128238	0.00127684	0.0192396	0.000650881	0.00237975	0	0	0.0271833	0.0274289	0	0.0241896	0.00127684	0.00191763	0.00830935	0.0104345	0.00103188	0.00103188	0	0.00181609	0	0.00517518	0.00260115	0.00737558	0.00797766	0.0231768	0.000650881	0.000844694	0.00181609	0.00237975	0.00191763	0.0328731	0	0.0192396	0.00610599	0.00935465
Moritellaceae	0.00852788	0.0145094	0	0.00645536	0.00168939	0.00732789	0.00127684	0.0120247	0.0318932	0.00237975	0.0108092	0.0022718	0.0148273	0.0173235	0.00265439	0.0130252	0.00127684	0	0.00823736	0.00822278	0.00154782	0.00154782	0.0108092	0.00272413	0.00265439	0.00776277	0.00910403	0.00737558	0.00199442	0.00772559	0	0.00168939	0.00272413	0.00237975	0	0.0309394	0.0022718	0.0120247	0.00584861	0.00729436
Sanguibacteraceae	0.0255836	0.00791421	0	0.0129107	0.00168939	0.0183197	0.0102147	0.00801648	0.00715969	0.00594937	0.0054046	0.00681539	0.00494242	0.0101054	0.00132719	0.00744297	0.0102147	0.00127842	0.00807161	0.00627878	0.00412752	0.00412752	0.0054046	0	0.00132719	0.00388138	0.00260115	0.00737558	0.00398883	0.00772559	0.00715969	0.00168939	0	0.00594937	0.00127842	0.0116023	0.00681539	0.00801648	0.00461502	0.00316199
Thiobacillaceae	0.00852788	0.0145094	0.00237265	0.00484152	0.00844694	0.00732789	0.00893786	0.016033	0.00585793	0.00594937	0.00675575	0.0034077	0.00741363	0.0173235	0.00265439	0.00930371	0.00893786	0.0063921	0.00805517	0.00421999	0.00361158	0.00361158	0.00675575	0.00817238	0.00265439	0.0194069	0.0104046	0.0129073	0.0119665	0.00772559	0.00585793	0.00844694	0.00817238	0.00594937	0.0063921	0.0154697	0.0034077	0.016033	0.0087192	0.00477845
Hapalosiphonaceae	0	0.0105523	0.00118632	0.0161384	0.00591286	0.0183197	0.000638419	0.016033	0.000650881	0.00178481	0.0027023	0	0.0247121	0.0245416	0.00199079	0.0167467	0.000638419	0.00191763	0.0080259	0.00892506	0.00103188	0.00103188	0.0027023	0.000908043	0.00199079	0.00517518	0.00650288	0.0129073	0.0199442	0.0231768	0.000650881	0.00591286	0.000908043	0.00178481	0.00191763	0.0251383	0	0.016033	0.00709537	0.008439
Parachlamydiaceae	0	0.0158284	0.000593162	0.0129107	0.000844694	0.0146558	0.00127684	0.0128264	0.000650881	0	0.00405345	0.00567949	0.0271833	0.0173235	0.00199079	0.0223289	0.00127684	0.00447447	0.00799431	0.00861329	0.00361158	0.00361158	0.00405345	0.000908043	0.00199079	0.0116442	0.00390173	0.00921948	0.00997208	0.00772559	0.000650881	0.000844694	0.000908043	0	0.00447447	0.0309394	0.00567949	0.0128264	0.00627566	0.0073137
Psychromonadaceae	0.00852788	0.0171475	0.000593162	0.00322768	0.00422347	0.00549591	0.00319209	0.0168346	0.00390528	0.00178481	0.027023	0.0011359	0.0197697	0.0144363	0.00265439	0.00744297	0.00319209	0.00127842	0.00788139	0.00776324	0.00361158	0.00361158	0.027023	0.00363217	0.00265439	0.00646897	0.00260115	0.0110634	0.00797766	0.0154512	0.00390528	0.00422347	0.00363217	0.00178481	0.00127842	0.0174034	0.0011359	0.0168346	0.00746073	0.00722216
Chrysiogenaceae	0.00213197	0.0145094	0	0.0129107	0.00506817	0.00915986	0.00383051	0.0128264	0.00520705	0.00118987	0	0.0022718	0.0247121	0.0216544	0.000663596	0.0186074	0.00383051	0.00063921	0.00773405	0.00792947	0.00206376	0.00206376	0	0.00181609	0.000663596	0.00646897	0.00130058	0.0129073	0.00598325	0.0154512	0.00520705	0.00506817	0.00181609	0.00118987	0.00063921	0.0116023	0.0022718	0.0128264	0.00496329	0.00494515
Endozoicomonadaceae	0.00213197	0.0145094	0	0.00484152	0.00168939	0.00366394	0.00127684	0.0176363	0.00130176	0.00118987	0.0135115	0.0034077	0.0370682	0.0173235	0.00132719	0.0148859	0.00127684	0	0.00761343	0.00976342	0	0	0.0135115	0.000908043	0.00132719	0.00646897	0.00260115	0.00553169	0.00997208	0.0231768	0.00130176	0.00168939	0.000908043	0.00118987	0	0.0290057	0.0034077	0.0176363	0.00659089	0.00871042
Thermoanaerobacterales Family IV. Incertae Sedis	0.00426394	0.00791421	0.000593162	0.00645536	0.00168939	0.00549591	0.00127684	0.027256	0.000650881	0	0.00135115	0	0.0370682	0.0259853	0.00132719	0.0111645	0.00127684	0.00191763	0.00753813	0.0110103	0.00206376	0.00206376	0.00135115	0.000908043	0.00132719	0.00129379	0.0052023	0	0.00797766	0.0231768	0.000650881	0.00168939	0.000908043	0	0.00191763	0.0367405	0	0.027256	0.00636261	0.0108853
Catenulisporaceae	0	0.0131903	0	0.0177522	0.00168939	0.0201517	0.00829944	0.0112231	0.000650881	0.00237975	0.0027023	0.0011359	0.00494242	0.0173235	0	0.0148859	0.00829944	0.0102274	0.00749187	0.00693196	0.00206376	0.00206376	0.0027023	0.00181609	0	0.0129379	0.00780346	0.0276584	0.0179497	0	0.000650881	0.00168939	0.00181609	0.00237975	0.0102274	0.0193371	0.0011359	0.0112231	0.00685861	0.00806541
Chelatococcaceae	0.00426394	0.0105523	0.00237265	0.00968304	0.00506817	0.00732789	0.00127684	0.027256	0.00455616	0.00237975	0.0081069	0.0045436	0.00741363	0.011549	0.000663596	0.0186074	0.00127684	0.00767053	0.00747602	0.00666451	0.0025797	0.0025797	0.0081069	0.00454021	0.000663596	0.00776277	0.0104046	0.0165951	0.0159553	0	0.00455616	0.00506817	0.00454021	0.00237975	0.00767053	0.0193371	0.0045436	0.027256	0.00802997	0.00730408
Thiotrichaceae	0.00213197	0.0118713	0	0.00484152	0.00168939	0.00366394	0.00319209	0.013628	0.000650881	0.00356962	0.0121604	0.0011359	0.0370682	0.011549	0.00132719	0.0204682	0.00319209	0.00127842	0.00741211	0.00937608	0.00309564	0.00309564	0.0121604	0	0.00132719	0.00646897	0.00390173	0.00553169	0.00997208	0.0154512	0.000650881	0.00168939	0	0.00356962	0.00127842	0.0212708	0.0011359	0.013628	0.00579042	0.00617513
Desulfarculaceae	0.00213197	0.0171475	0	0.0145246	0	0.00915986	0.000638419	0.0200412	0.00130176	0.00178481	0.00135115	0.0011359	0.0172985	0.0317598	0	0.0130252	0.000638419	0.00127842	0.00740097	0.00938453	0.00051594	0.00051594	0.00135115	0.00272413	0	0.0116442	0.0052023	0.0165951	0.00997208	0.0154512	0.00130176	0	0.00272413	0.00178481	0.00127842	0.040608	0.0011359	0.0200412	0.00738034	0.0104921
Sedimentisphaeraceae	0.00639591	0.0158284	0.000593162	0.0129107	0.00337878	0.0109918	0.000638419	0.0208429	0.00130176	0.00118987	0	0.0022718	0.0148273	0.023098	0.00265439	0.0148859	0.000638419	0.00063921	0.00739371	0.00779381	0.00412752	0.00412752	0	0	0.00265439	0.00646897	0.00780346	0.0110634	0.00398883	0.00772559	0.00130176	0.00337878	0	0.00118987	0.00063921	0.0464091	0.0022718	0.0208429	0.0068885	0.0111039
Limnochordaceae	0.00426394	0.0197855	0	0.0177522	0.000844694	0.0128238	0.000638419	0.0240494	0.000650881	0.000594937	0	0	0.0148273	0.0173235	0.000663596	0.0148859	0.000638419	0.00063921	0.00724343	0.00863611	0.00103188	0.00103188	0	0.000908043	0.000663596	0.0116442	0.0052023	0.00553169	0.00797766	0.00772559	0.000650881	0.000844694	0.000908043	0.000594937	0.00063921	0.0193371	0	0.0240494	0.00493006	0.00701887
Vicinamibacteraceae	0.00852788	0.0105523	0.000593162	0.0177522	0.00168939	0.0146558	0.00191526	0.0104214	0.0032544	0.00118987	0.0027023	0.0022718	0.0222409	0.0173235	0.00199079	0.00930371	0.00191526	0.00191763	0.00723431	0.00687944	0.00051594	0.00051594	0.0027023	0.00272413	0.00199079	0.0142317	0.0117052	0.00737558	0.00797766	0.0231768	0.0032544	0.00168939	0.00272413	0.00118987	0.00191763	0.013536	0.0022718	0.0104214	0.0061067	0.00625758
Halothiobacillaceae	0.00639591	0.00659517	0.000593162	0.00645536	0.00591286	0.00732789	0.00319209	0.013628	0.00585793	0.0047595	0.00675575	0.00795129	0.0172985	0.0187671	0.00132719	0.00930371	0.00319209	0.00319605	0.00713942	0.00496763	0.00309564	0.00309564	0.00675575	0.00544826	0.00132719	0.00646897	0.0156069	0.00368779	0.0199442	0.00772559	0.00585793	0.00591286	0.00544826	0.0047595	0.00319605	0.013536	0.00795129	0.013628	0.00741366	0.00501412
Scytonemataceae	0.00426394	0.0145094	0.000593162	0.0080692	0.00168939	0.00732789	0.00446893	0.0152313	0.00260352	0.00237975	0.0027023	0.0011359	0.0123561	0.0259853	0.000663596	0.0167467	0.00446893	0.00255684	0.00709734	0.00708073	0.00619128	0.00619128	0.0027023	0.00181609	0.000663596	0.0103504	0.0052023	0.00737558	0.00598325	0	0.00260352	0.00168939	0.00181609	0.00237975	0.00255684	0.0328731	0.0011359	0.0152313	0.00593122	0.00773808
Bogoriellaceae	0.00639591	0.0184665	0.00177949	0.0129107	0.000844694	0.0109918	0.00383051	0.0176363	0.00520705	0.00237975	0	0.0034077	0.00988484	0.011549	0.00199079	0.00930371	0.00383051	0.0063921	0.00704452	0.00556932	0.00103188	0.00103188	0	0.000908043	0.00199079	0.0129379	0.0195086	0.0221267	0.0259274	0.00772559	0.00520705	0.000844694	0.000908043	0.00237975	0.0063921	0.0212708	0.0034077	0.0176363	0.00840196	0.00893111
Calditrichaceae	0.00426394	0.0118713	0.00118632	0.00968304	0	0.00732789	0.00383051	0.013628	0.000650881	0.00178481	0.00405345	0.0034077	0.0148273	0.0274289	0.00199079	0.0148859	0.00383051	0.00063921	0.00696058	0.00719786	0.00103188	0.00103188	0.00405345	0.00181609	0.00199079	0.00388138	0.0052023	0.0165951	0.00797766	0.0154512	0.000650881	0	0.00181609	0.00178481	0.00063921	0.027072	0.0034077	0.013628	0.00600169	0.00741583
Pseudanabaenaceae	0.00426394	0.0158284	0.00118632	0.0080692	0.00591286	0.00732789	0.00191526	0.0208429	0	0.00118987	0.00405345	0.0022718	0.0148273	0.0216544	0.00199079	0.0111645	0.00191526	0.00063921	0.0069474	0.00701951	0.00103188	0.00103188	0.00405345	0.00181609	0.00199079	0.00646897	0.0052023	0.00921948	0.00797766	0.0231768	0	0.00591286	0.00181609	0.00118987	0.00063921	0.0232045	0.0022718	0.0208429	0.00654703	0.00777293
Rubrobacteraceae	0.00426394	0.0184665	0	0.00968304	0.00168939	0.00732789	0.00191526	0.0208429	0.00195264	0.000594937	0.00135115	0.0011359	0.0148273	0.0187671	0.000663596	0.0186074	0.00191526	0.00063921	0.00692463	0.00772535	0.00103188	0.00103188	0.00135115	0	0.000663596	0.0103504	0.00650288	0.018439	0.0139609	0.0231768	0.00195264	0.00168939	0	0.000594937	0.00063921	0.0290057	0.0011359	0.0208429	0.00735383	0.0095083
Desulfurobacteriaceae	0.00426394	0.0105523	0.000593162	0.0129107	0.00168939	0.00915986	0.000638419	0.016033	0.000650881	0.000594937	0	0.0011359	0.0296545	0.0245416	0.000663596	0.00930371	0.000638419	0	0.00683469	0.00898075	0.00154782	0.00154782	0	0	0.000663596	0.00258759	0.0052023	0.00553169	0.00598325	0.00772559	0.000650881	0.00168939	0	0.000594937	0	0.0193371	0.0011359	0.016033	0.00390171	0.00556753
Dermocarpellaceae	0.00426394	0.00527614	0	0.00484152	0.00422347	0.00549591	0	0.0152313	0	0.000594937	0.0054046	0.0045436	0.0296545	0.0245416	0.000663596	0.0167467	0	0.00127842	0.00682002	0.00883404	0.00206376	0.00206376	0.0054046	0.00181609	0.000663596	0.0103504	0.0052023	0.00921948	0.00398883	0.0231768	0	0.00422347	0.00181609	0.000594937	0.00127842	0.027072	0.0045436	0.0152313	0.00659496	0.00781966
Ignavibacteriaceae	0.00213197	0.00791421	0.000593162	0.0080692	0.00337878	0.00549591	0.00191526	0.0192396	0.000650881	0.000594937	0.0054046	0.0045436	0.0321257	0.0144363	0.000663596	0.0130252	0.00191526	0.00063921	0.00681874	0.00831884	0.00154782	0.00154782	0.0054046	0.00181609	0.000663596	0.00258759	0.00130058	0.00368779	0	0.0154512	0.000650881	0.00337878	0.00181609	0.000594937	0.00063921	0.0367405	0.0045436	0.0192396	0.00564504	0.00933508
Cardiobacteriaceae	0.00639591	0.00791421	0	0.00968304	0.00168939	0.00915986	0.000638419	0.0168346	0.00130176	0.00356962	0.00675575	0.0045436	0.0247121	0.011549	0.00132719	0.00930371	0.000638419	0.00255684	0.00658741	0.00644814	0.00103188	0.00103188	0.00675575	0.000908043	0.00132719	0.00776277	0.00650288	0.00553169	0.0199442	0.0154512	0.00130176	0.00168939	0.000908043	0.00356962	0.00255684	0.0212708	0.0045436	0.0168346	0.00660678	0.00692595
Immundisolibacteraceae	0.00426394	0.00659517	0.00118632	0.0112969	0.00591286	0.00915986	0.00510735	0.00561154	0.00455616	0.00535443	0.0108092	0.0022718	0.00988484	0.0158799	0.00199079	0.00930371	0.00510735	0.00383526	0.00656263	0.00379274	0.00670722	0.00670722	0.0108092	0.00181609	0.00199079	0.00646897	0.00130058	0.00553169	0.00199442	0.0154512	0.00455616	0.00591286	0.00181609	0.00535443	0.00383526	0.0154697	0.0022718	0.00561154	0.00575584	0.00429058
Salinisphaeraceae	0	0.00791421	0.000593162	0.00484152	0.00337878	0.00549591	0.00319209	0.0128264	0.00911233	0.00297469	0.00135115	0.00567949	0.0172985	0.0202108	0.00265439	0.0130252	0.00319209	0.00255684	0.00646097	0.0058333	0.00412752	0.00412752	0.00135115	0.00454021	0.00265439	0.00646897	0.0117052	0.00737558	0.00598325	0.0231768	0.00911233	0.00337878	0.00454021	0.00297469	0.00255684	0.0116023	0.00567949	0.0128264	0.00689897	0.00528532
Euzebyaceae	0.00852788	0.0171475	0.000593162	0.0161384	0.00337878	0.0128238	0	0.0128264	0.00260352	0.00237975	0.00135115	0.0011359	0.0123561	0.0129926	0	0.00930371	0	0.00127842	0.00637983	0.00623336	0.00154782	0.00154782	0.00135115	0.00272413	0	0.00905656	0.00650288	0.00368779	0.00199442	0	0.00260352	0.00337878	0.00272413	0.00237975	0.00127842	0.0154697	0.0011359	0.0128264	0.00390051	0.00433931
Wenzhouxiangellaceae	0.00213197	0.0039571	0.000593162	0.0145246	0.00422347	0.00915986	0.00191526	0.0128264	0.00911233	0.00178481	0.0054046	0.0011359	0.0148273	0.011549	0.00331798	0.0111645	0.00191526	0.00319605	0.0062633	0.00493968	0.00309564	0.00309564	0.0054046	0.000908043	0.00331798	0.00646897	0.00650288	0.00737558	0	0	0.00911233	0.00422347	0.000908043	0.00178481	0.00319605	0.00773485	0.0011359	0.0128264	0.00428284	0.00350886
Conexibacteraceae	0.00426394	0.00527614	0	0.0145246	0.00253408	0.0109918	0.00255368	0.013628	0.00195264	0.00297469	0.00405345	0.0011359	0.00988484	0.0144363	0	0.0130252	0.00255368	0.00703131	0.00615668	0.00518083	0.00103188	0.00103188	0.00405345	0	0	0.0103504	0.0143063	0.0165951	0.0139609	0.00772559	0.00195264	0.00253408	0	0.00297469	0.00703131	0.0174034	0.0011359	0.013628	0.00642864	0.00630065
Cyanobacteriaceae	0.00213197	0.00923324	0	0.0129107	0.000844694	0.00915986	0.000638419	0.0120247	0	0.00178481	0.00135115	0.0011359	0.0197697	0.0216544	0.000663596	0.0148859	0.000638419	0.00127842	0.006117	0.00728703	0.00103188	0.00103188	0.00135115	0.000908043	0.000663596	0.00646897	0.00260115	0.0129073	0.0119665	0	0	0.000844694	0.000908043	0.00178481	0.00127842	0.0212708	0.0011359	0.0120247	0.00434321	0.00608168
Emcibacteraceae	0.00213197	0.0171475	0.000593162	0.00322768	0.00253408	0.00366394	0.00574577	0.0184379	0.00260352	0.00118987	0.00405345	0.0045436	0.00988484	0.0158799	0	0.0111645	0.00574577	0.00127842	0.00610143	0.00587375	0.00103188	0.00103188	0.00405345	0.00726434	0	0.00776277	0.00910403	0.00921948	0.0119665	0.00772559	0.00260352	0.00253408	0.00726434	0.00118987	0.00127842	0.013536	0.0045436	0.0184379	0.00614154	0.00506584
Glycomycetaceae	0.00213197	0.0158284	0.000593162	0.00968304	0.00168939	0.00732789	0.00255368	0.016033	0.00260352	0.0047595	0.0027023	0.0011359	0.0148273	0.0187671	0.000663596	0.00186074	0.00255368	0.00127842	0.00594403	0.00620955	0	0	0.0027023	0	0.000663596	0.0155255	0.00260115	0.0147512	0.0179497	0.0154512	0.00260352	0.00168939	0	0.0047595	0.00127842	0.0154697	0.0011359	0.016033	0.00625634	0.00711711
Caldilineaceae	0.00213197	0.0184665	0	0.00161384	0.000844694	0.00183197	0.00127684	0.0152313	0.00195264	0.00297469	0.0054046	0.0022718	0.0172985	0.0173235	0	0.0130252	0.00127684	0.00255684	0.00586009	0.00682521	0.00154782	0.00154782	0.0054046	0.000908043	0	0.00776277	0.00260115	0.0018439	0.00797766	0.0231768	0.00195264	0.000844694	0.000908043	0.00297469	0.00255684	0.0232045	0.0022718	0.0152313	0.00570639	0.00734153
Saprospiraceae	0.00426394	0.0131903	0	0.00161384	0.000844694	0.00366394	0.00574577	0.013628	0.000650881	0.00118987	0.00405345	0.0011359	0.0172985	0.0202108	0.00199079	0.00930371	0.00574577	0.00063921	0.00584274	0.00625152	0.00051594	0.00051594	0.00405345	0.00363217	0.00199079	0.00776277	0	0.00737558	0.00997208	0	0.000650881	0.000844694	0.00363217	0.00118987	0.00063921	0.0212708	0.0011359	0.013628	0.00437835	0.00573317
Desulfurellaceae	0.00213197	0.0118713	0.000593162	0.00484152	0.00168939	0.00366394	0.00191526	0.0208429	0	0.000594937	0.00135115	0.0022718	0.0222409	0.0202108	0.00331798	0.00186074	0.00191526	0.00383526	0.00584157	0.00748618	0.00412752	0.00412752	0.00135115	0	0.00331798	0.00258759	0.00390173	0.00553169	0.00398883	0.0154512	0	0.00168939	0	0.000594937	0.00383526	0.0154697	0.0022718	0.0208429	0.0049494	0.00598996
Sphaerobacteraceae	0.00213197	0.00923324	0	0.0112969	0.000844694	0.00732789	0.000638419	0.0184379	0.00130176	0.000594937	0.00405345	0.0011359	0.0123561	0.0216544	0.00199079	0.0111645	0.000638419	0	0.00582229	0.00674049	0.00051594	0.00051594	0.00405345	0.00181609	0.00199079	0.00388138	0.00780346	0.00921948	0.0159553	0.00772559	0.00130176	0.000844694	0.00181609	0.000594937	0	0.0232045	0.0011359	0.0184379	0.00560074	0.00694757
Kiritimatiellaceae	0	0.0158284	0.000593162	0.0145246	0	0.0164877	0.000638419	0.0120247	0	0.00118987	0.00135115	0.0022718	0.0123561	0.0158799	0	0.00930371	0.000638419	0.00063921	0.00576262	0.00678052	0.00051594	0.00051594	0.00135115	0	0	0.0116442	0.00650288	0.00921948	0.0159553	0.00772559	0	0	0	0.00118987	0.00063921	0.0154697	0.0022718	0.0120247	0.00472365	0.00578409
Beutenbergiaceae	0.00639591	0.00791421	0.00355897	0.0129107	0.00337878	0.0109918	0.00127684	0.00961978	0	0.00178481	0.0027023	0.0022718	0.0123561	0.0144363	0.00398158	0.00372148	0.00127684	0.00255684	0.00561861	0.00457397	0.00103188	0.00103188	0.0027023	0.000908043	0.00398158	0.00646897	0.0104046	0.0147512	0.00997208	0.0231768	0	0.00337878	0.000908043	0.00178481	0.00255684	0.0116023	0.0022718	0.00961978	0.00591953	0.00620226
Thioalkalispiraceae	0.00213197	0.00659517	0.000593162	0.00645536	0	0.00549591	0.00510735	0.0112231	0.00260352	0.00178481	0.0054046	0.0011359	0.0197697	0.0144363	0.00199079	0.00930371	0.00510735	0.00127842	0.00557873	0.00525841	0.00309564	0.00309564	0.0054046	0.0118046	0.00199079	0.00646897	0.0052023	0.0129073	0.00199442	0.0231768	0.00260352	0	0.0118046	0.00178481	0.00127842	0.0154697	0.0011359	0.0112231	0.00669116	0.00632433
Melioribacteraceae	0.00213197	0.0145094	0	0.00645536	0	0.00549591	0.00255368	0.016033	0	0.00178481	0.00135115	0.0011359	0.0197697	0.0129926	0	0.0130252	0.00255368	0	0.00554402	0.006595	0.00051594	0.00051594	0.00135115	0	0	0.00129379	0	0.00553169	0.00797766	0.0154512	0	0	0	0.00178481	0	0.00773485	0.0011359	0.016033	0.00329588	0.00521785
Dictyoglomaceae	0	0.0105523	0	0.00322768	0.00168939	0.00366394	0.000638419	0.0120247	0.00195264	0.000594937	0.00675575	0.0022718	0.0197697	0.0173235	0.000663596	0.0148859	0.000638419	0.00191763	0.00547613	0.00648661	0.00103188	0.00103188	0.00675575	0.000908043	0.000663596	0.00388138	0.0052023	0.0018439	0.00797766	0.00772559	0.00195264	0.00168939	0.000908043	0.000594937	0.00191763	0.0116023	0.0022718	0.0120247	0.00388797	0.00377054
Dermatophilaceae	0.00426394	0.0211046	0.000593162	0.00645536	0.00168939	0.00549591	0.00127684	0.0120247	0	0.00118987	0	0.0022718	0.0123561	0.0129926	0.00132719	0.0111645	0.00127684	0.00127842	0.00537562	0.0060511	0.00154782	0.00154782	0	0.00181609	0.00132719	0.00129379	0.00390173	0.00921948	0.0139609	0.0231768	0	0.00168939	0.00181609	0.00118987	0.00127842	0.0251383	0.0022718	0.0120247	0.00573334	0.0078329
Coxiellaceae	0.00852788	0.0118713	0.00177949	0.0080692	0	0.00915986	0.000638419	0.013628	0.00130176	0.00118987	0	0.0011359	0.0172985	0.0144363	0.000663596	0.00558223	0.000638419	0.00063921	0.00536444	0.00583315	0.00206376	0.00206376	0	0.000908043	0.000663596	0.00388138	0.00910403	0.00737558	0.00598325	0.0386279	0.00130176	0	0.000908043	0.00118987	0.00063921	0.0193371	0.0011359	0.013628	0.00604507	0.00969402
Fimbriimonadaceae	0.00426394	0.0171475	0	0.0129107	0.000844694	0.00915986	0.00255368	0.0104214	0	0.00118987	0	0	0.00741363	0.011549	0.000663596	0.0111645	0.00255368	0	0.005102	0.00559129	0	0	0	0.00272413	0.000663596	0.00646897	0.00390173	0.00553169	0.00398883	0.00772559	0	0.000844694	0.00272413	0.00118987	0	0.013536	0	0.0104214	0.00331781	0.00401735
Vulgatibacteraceae	0.0106598	0.0131903	0.000593162	0.00645536	0.00337878	0.00915986	0.000638419	0.0104214	0.00260352	0.00118987	0.00135115	0.0022718	0.00741363	0.011549	0.000663596	0.00744297	0.000638419	0.00127842	0.00504998	0.00444797	0.00154782	0.00154782	0.00135115	0	0.000663596	0.00517518	0.00780346	0.0221267	0.0139609	0	0.00260352	0.00337878	0	0.00118987	0.00127842	0.00580114	0.0022718	0.0104214	0.00450676	0.00585262
Puniceicoccaceae	0	0.0145094	0	0.00484152	0.00253408	0.00549591	0	0.0120247	0.000650881	0	0.00135115	0.0011359	0.0222409	0.0144363	0.000663596	0.00930371	0	0	0.00495489	0.00671639	0.00051594	0.00051594	0.00135115	0.000908043	0.000663596	0.00129379	0.00260115	0.00368779	0.00598325	0.0154512	0.000650881	0.00253408	0.000908043	0	0	0.0174034	0.0011359	0.0120247	0.00375716	0.00543702
Ichthyobacteriaceae	0.00639591	0.0158284	0	0.00484152	0.00253408	0.00549591	0	0.0128264	0	0.000594937	0.00405345	0	0.00988484	0.0129926	0.000663596	0.0130252	0	0	0.00495205	0.00557314	0.00051594	0.00051594	0.00405345	0	0.000663596	0.00129379	0.00260115	0.0018439	0.00199442	0.0231768	0	0.00253408	0	0.000594937	0	0.0174034	0	0.0128264	0.00388988	0.00673967
Merismopediaceae	0.00426394	0.0118713	0.000593162	0.00322768	0.00168939	0.00366394	0.00319209	0.0112231	0.00130176	0.00118987	0.0054046	0.0034077	0.00494242	0.0187671	0.00199079	0.00744297	0.00319209	0.00127842	0.00492458	0.00471249	0.00412752	0.00412752	0.0054046	0	0.00199079	0.00258759	0.00260115	0.00368779	0	0.00772559	0.00130176	0.00168939	0	0.00118987	0.00127842	0.0154697	0.0034077	0.0112231	0.00376736	0.00408007
Thermodesulfobiaceae	0.00639591	0.0039571	0.000593162	0	0.00168939	0.00549591	0.00191526	0.00881813	0.000650881	0.000594937	0.00135115	0.0034077	0.0197697	0.0101054	0.000663596	0.0167467	0.00191526	0.00447447	0.00491914	0.00567552	0.00103188	0.00103188	0.00135115	0.00272413	0.000663596	0	0.0052023	0.00553169	0.00797766	0.00772559	0.000650881	0.00168939	0.00272413	0.000594937	0.00447447	0.0154697	0.0034077	0.00881813	0.00394829	0.00399973
Coleofasciculaceae	0.00213197	0.0158284	0	0.00645536	0.00337878	0.00549591	0.00127684	0.0128264	0.00195264	0.000594937	0.00135115	0.0011359	0.00494242	0.0173235	0.000663596	0.00930371	0.00127684	0.00063921	0.00480987	0.00547158	0.00051594	0.00051594	0.00135115	0.000908043	0.000663596	0	0	0.00921948	0.00797766	0.00772559	0.00195264	0.00337878	0.000908043	0.000594937	0.00063921	0.0174034	0.0011359	0.0128264	0.00376204	0.00510304
Natranaerobiaceae	0	0.0158284	0.000593162	0.00161384	0	0.00183197	0.00127684	0.0120247	0	0.000594937	0	0.0034077	0.0148273	0.0173235	0.000663596	0.00930371	0.00127684	0.00191763	0.00458245	0.00618024	0.00206376	0.00206376	0	0.000908043	0.000663596	0.00388138	0.00260115	0.00737558	0	0.0154512	0	0	0.000908043	0.000594937	0.00191763	0.0212708	0.0034077	0.0120247	0.00417402	0.00606174
Prochlorotrichaceae	0	0.00923324	0	0.0112969	0	0.0128238	0.00255368	0.0104214	0	0.00118987	0.0027023	0.0011359	0.00741363	0.011549	0.000663596	0.00744297	0.00255368	0.00063921	0.0045344	0.00474945	0	0	0.0027023	0.000908043	0.000663596	0.00258759	0.00390173	0.00553169	0	0	0	0	0.000908043	0.00118987	0.00063921	0.0174034	0.0011359	0.0104214	0.00266627	0.00452801
Magnetococcaceae	0	0.0118713	0.000593162	0.00322768	0.00506817	0.00366394	0.00319209	0.00881813	0	0.000594937	0.00945805	0.0034077	0.00494242	0.0129926	0.000663596	0.00930371	0.00319209	0	0.00449942	0.00424401	0.00103188	0.00103188	0.00945805	0.00272413	0.000663596	0.00646897	0.00130058	0.00737558	0.00199442	0.00772559	0	0.00506817	0.00272413	0.000594937	0	0.0174034	0.0034077	0.00881813	0.00432173	0.00454109
Gomontiellaceae	0.00213197	0.00923324	0	0.0080692	0.00168939	0.00549591	0.00127684	0.00561154	0.00520705	0.000594937	0.00135115	0	0.00988484	0.0158799	0.000663596	0.0111645	0.00127684	0	0.00441838	0.00470032	0.00154782	0.00154782	0.00135115	0.000908043	0.000663596	0.00258759	0.00130058	0.00553169	0.00398883	0.0154512	0.00520705	0.00168939	0.000908043	0.000594937	0	0.0154697	0	0.00561154	0.0035755	0.00468634
Egicoccaceae	0	0.0118713	0	0.0080692	0.00760225	0.00915986	0.00127684	0.00961978	0.0032544	0	0.0027023	0.00567949	0.00494242	0.00577451	0.00265439	0.00372148	0.00127684	0.00191763	0.00441793	0.00363567	0.00206376	0.00206376	0.0027023	0	0.00265439	0.00646897	0.00260115	0.0129073	0.00797766	0.0231768	0.0032544	0.00760225	0	0	0.00191763	0.00773485	0.00567949	0.00961978	0.00546802	0.00572601
Elusimicrobiaceae	0.00213197	0.00527614	0.000593162	0.00645536	0	0.00549591	0.000638419	0.0112231	0	0.000594937	0.00135115	0	0.0172985	0.0144363	0.00199079	0.00930371	0.000638419	0.00127842	0.00437257	0.00536445	0.00103188	0.00103188	0.00135115	0.000908043	0.00199079	0.00388138	0.00390173	0.00921948	0.00398883	0.00772559	0	0	0.000908043	0.000594937	0.00127842	0.013536	0	0.0112231	0.00347618	0.0041594
Candidatus Brocadiaceae	0.00213197	0.00263807	0	0.00322768	0.000844694	0.00366394	0.000638419	0.00881813	0	0.00118987	0.0027023	0.0011359	0.0172985	0.011549	0.00199079	0.0148859	0.000638419	0	0.0040752	0.00533515	0.00103188	0.00103188	0.0027023	0	0.00199079	0.00388138	0.0052023	0.00553169	0.00797766	0.00772559	0	0.000844694	0	0.00118987	0	0.0154697	0.0011359	0.00881813	0.00358521	0.00419085
Phycisphaeraceae	0.00426394	0.00659517	0.000593162	0.0080692	0	0.00732789	0.00127684	0.00881813	0.00195264	0.00178481	0.0027023	0	0.00988484	0.0101054	0.00132719	0.00186074	0.00127684	0.00511368	0.00405293	0.00352879	0.00103188	0.00103188	0.0027023	0.000908043	0.00132719	0.0168193	0.00650288	0.018439	0.0159553	0.0231768	0.00195264	0	0.000908043	0.00178481	0.00511368	0.00773485	0	0.00881813	0.00634482	0.00733992
Chamaesiphonaceae	0.00426394	0.00263807	0.00118632	0.00968304	0.000844694	0.00732789	0.000638419	0.00721483	0.00130176	0.000594937	0.0027023	0.0034077	0.0172985	0.00288725	0	0.00930371	0.000638419	0	0.00399621	0.00457121	0.00051594	0.00051594	0.0027023	0.00181609	0	0.00388138	0	0.00737558	0.00997208	0	0.00130176	0.000844694	0.00181609	0.000594937	0	0.0116023	0.0034077	0.00721483	0.00297564	0.00363802
Chroococcidiopsidaceae	0	0.00791421	0	0.0080692	0	0.00915986	0.00127684	0.00400824	0	0.000594937	0.0054046	0.0011359	0.00988484	0.0129926	0	0.00744297	0.00127684	0.00127842	0.00391331	0.00426842	0.00051594	0.00051594	0.0054046	0	0	0.00517518	0.00260115	0.00921948	0.0119665	0.0231768	0	0	0	0.000594937	0.00127842	0.013536	0.0011359	0.00400824	0.00439606	0.00634016
Oleiphilaceae	0.00213197	0.00791421	0.000593162	0.00322768	0.00506817	0.00366394	0.00383051	0.00801648	0.00130176	0.000594937	0.0081069	0.0011359	0.00741363	0.00433088	0.00132719	0.00558223	0.00383051	0.00191763	0.00388821	0.00263375	0	0	0.0081069	0.00272413	0.00132719	0.00517518	0.00130058	0.00737558	0.00598325	0.0154512	0.00130176	0.00506817	0.00272413	0.000594937	0.00191763	0.00773485	0.0011359	0.00801648	0.00421877	0.00403052
Acaryochloridaceae	0.00426394	0.0118713	0	0.00484152	0.000844694	0.00549591	0.000638419	0.0104214	0.000650881	0	0.00405345	0	0.0123561	0.00577451	0.00132719	0.00558223	0.000638419	0.00063921	0.00385551	0.00414106	0.00051594	0.00051594	0.00405345	0	0.00132719	0.00646897	0	0.00553169	0.00199442	0.0154512	0.000650881	0.000844694	0	0	0.00063921	0.00773485	0	0.0104214	0.00311944	0.00439727
Chthonomonadaceae	0.00213197	0.00923324	0	0.00322768	0.00168939	0.00366394	0	0.00801648	0.00130176	0.00118987	0.0027023	0.0034077	0.0123561	0.0101054	0.000663596	0.00372148	0	0	0.00352283	0.00382314	0.00154782	0.00154782	0.0027023	0.00181609	0.000663596	0	0.00130058	0.0018439	0.00199442	0.00772559	0.00130176	0.00168939	0.00181609	0.00118987	0	0.00966856	0.0034077	0.00801648	0.00267955	0.0028072
Bacteriovoracaceae	0	0.0105523	0.00177949	0.00322768	0.00760225	0.00366394	0.000638419	0.00400824	0.00260352	0.00178481	0.00135115	0.0022718	0.00741363	0.00433088	0.000663596	0.00930371	0.000638419	0	0.00343521	0.00323847	0.00412752	0.00412752	0.00135115	0.00272413	0.000663596	0.00129379	0.00130058	0.0018439	0.00199442	0.0154512	0.00260352	0.00760225	0.00272413	0.00178481	0	0.00773485	0.0022718	0.00400824	0.00353374	0.00363564
Hydrogenophilaceae	0.00213197	0.0039571	0.000593162	0.00484152	0.00168939	0.00366394	0.00255368	0.00561154	0.00390528	0.00178481	0.0027023	0	0.0123561	0	0.00265439	0.00930371	0.00255368	0.00127842	0.00342116	0.00314155	0.00051594	0.00051594	0.0027023	0.00181609	0.00265439	0.00129379	0	0.0018439	0.00398883	0.0154512	0.00390528	0.00168939	0.00181609	0.00178481	0.00127842	0.00580114	0	0.00561154	0.00292606	0.00355756
Methylacidiphilaceae	0.00213197	0.0118713	0	0.00484152	0	0.00366394	0.000638419	0.00961978	0	0.000594937	0	0.0011359	0.00988484	0.00433088	0	0.0111645	0.000638419	0	0.00336202	0.00430453	0	0	0	0	0	0.00258759	0.00130058	0.00368779	0.00199442	0	0	0	0	0.000594937	0	0.0154697	0.0011359	0.00961978	0.0020217	0.00410086
Kineosporiaceae	0.00213197	0.00263807	0.00118632	0.00322768	0.00253408	0.00366394	0.00127684	0.00721483	0.00260352	0.00237975	0.0054046	0.0022718	0.00247121	0.00433088	0.000663596	0.00930371	0.00127684	0.00191763	0.00313874	0.00221642	0.00103188	0.00103188	0.0054046	0.00181609	0.000663596	0.00776277	0.00650288	0.0129073	0.00797766	0	0.00260352	0.00253408	0.00181609	0.00237975	0.00191763	0.00580114	0.0022718	0.00721483	0.00397986	0.00342539
Caldisericaceae	0	0.00263807	0	0.00322768	0	0.00366394	0	0.00801648	0	0.00118987	0	0	0.0148273	0.011549	0	0.00930371	0	0.00127842	0.00309414	0.00463729	0.00103188	0.00103188	0	0.00181609	0	0.00129379	0	0.00368779	0.00398883	0.00772559	0	0	0.00181609	0.00118987	0.00127842	0.00966856	0	0.00801648	0.00236363	0.00306622
Thermomicrobiaceae	0	0.0039571	0	0.0112969	0	0.0128238	0.000638419	0.00801648	0	0.000594937	0	0	0.00741363	0.00577451	0.000663596	0.00186074	0.000638419	0.00063921	0.00301765	0.00421389	0	0	0	0.00181609	0.000663596	0.00258759	0.00260115	0.00553169	0.00398883	0	0	0	0.00181609	0.000594937	0.00063921	0.0116023	0	0.00801648	0.00221433	0.00323937
Hyellaceae	0.00213197	0.00131903	0.000593162	0.00322768	0	0.00366394	0.00255368	0.00641319	0.00130176	0.000594937	0	0	0.00741363	0.0101054	0	0.00744297	0.00255368	0.00127842	0.00281075	0.00305448	0.00051594	0.00051594	0	0.00363217	0	0.00258759	0.00130058	0.00368779	0.00398883	0.00772559	0.00130176	0	0.00363217	0.000594937	0.00127842	0.0154697	0	0.00641319	0.0029247	0.00387035
Endomicrobiaceae	0.00426394	0.0039571	0.000593162	0.00484152	0	0.00549591	0.00319209	0.00561154	0	0.000594937	0.00135115	0.0011359	0.00247121	0.0101054	0.000663596	0.00186074	0.00319209	0.00063921	0.00277608	0.00262334	0.00051594	0.00051594	0.00135115	0.000908043	0.000663596	0.00517518	0.00390173	0.0110634	0.00797766	0.00772559	0	0	0.000908043	0.000594937	0.00063921	0.013536	0.0011359	0.00561154	0.00345688	0.00415752
Cyanothecaceae	0.00213197	0.00263807	0.000593162	0.00484152	0.000844694	0.00366394	0.00383051	0.00240494	0	0.000594937	0	0	0.00247121	0.011549	0	0.00930371	0.00383051	0.00063921	0.00274097	0.00321888	0	0	0	0.00272413	0	0.00129379	0	0.00553169	0.00398883	0.00772559	0	0.000844694	0.00272413	0.000594937	0.00063921	0.00966856	0	0.00240494	0.00211892	0.0028966
Trueperaceae	0.00426394	0.00791421	0.000593162	0.00484152	0	0.00549591	0	0.00641319	0	0.00118987	0.00135115	0	0.00494242	0.0101054	0.000663596	0	0	0	0.00265413	0.00324826	0.00103188	0.00103188	0.00135115	0.000908043	0.000663596	0.00646897	0.00130058	0.00737558	0.00199442	0.00772559	0	0	0.000908043	0.00118987	0	0.00773485	0	0.00641319	0.00256098	0.00298981
Egibacteraceae	0	0.0039571	0.00118632	0.0080692	0.000844694	0.00915986	0	0.00561154	0.000650881	0.000594937	0.00135115	0	0.00741363	0.00433088	0.000663596	0.00186074	0	0.00063921	0.0025741	0.0030645	0.00103188	0.00103188	0.00135115	0	0.000663596	0.00517518	0.00910403	0.00921948	0.00598325	0	0.000650881	0.000844694	0	0.000594937	0.00063921	0.00580114	0	0.00561154	0.00265016	0.00321286
Acidothermaceae	0.00426394	0.0039571	0	0.00322768	0	0.00366394	0	0.00320659	0.000650881	0.000594937	0	0.0011359	0.0123561	0.00433088	0.000663596	0.00372148	0	0.00255684	0.00246277	0.00300112	0	0	0	0	0.000663596	0.00258759	0.00130058	0	0.00199442	0	0.000650881	0	0	0.000594937	0.00255684	0.00773485	0.0011359	0.00320659	0.0012459	0.00193391
Desulfohalobiaceae	0	0.00263807	0	0.00161384	0	0.00183197	0.000638419	0.00961978	0	0.00118987	0	0	0.00247121	0.0144363	0	0.00558223	0.000638419	0.00191763	0.00236543	0.00388305	0.00051594	0.00051594	0	0.000908043	0	0.00388138	0.00650288	0.0018439	0	0.00772559	0	0	0.000908043	0.00118987	0.00191763	0.00773485	0	0.00961978	0.00240355	0.00321845
Waddliaceae	0	0.00659517	0	0.00161384	0	0.00183197	0	0.00320659	0.000650881	0.000594937	0	0	0.00741363	0.00721813	0	0.0111645	0	0.00127842	0.00230934	0.00341161	0	0	0	0	0	0.00388138	0.00130058	0	0.00398883	0	0.000650881	0	0	0.000594937	0.00127842	0.00773485	0	0.00320659	0.00125758	0.0021244
Woeseiaceae	0.00426394	0.00263807	0.000593162	0.00484152	0.00168939	0.00549591	0	0.00240494	0	0.00178481	0.0054046	0.0011359	0.00247121	0.00433088	0	0.00186074	0	0.00255684	0.002304	0.00189074	0.00051594	0.00051594	0.0054046	0	0	0.00258759	0.00260115	0.00368779	0.00199442	0	0	0.00168939	0	0.00178481	0.00255684	0.00966856	0.0011359	0.00240494	0.00203044	0.00242178
Holosporaceae	0	0.00263807	0	0.00322768	0.000844694	0.00366394	0.00127684	0.00801648	0	0	0.00135115	0.0011359	0.00494242	0.00866176	0	0.00186074	0.00127684	0.00063921	0.00219643	0.00264178	0	0	0.00135115	0	0	0.00129379	0.00130058	0	0	0.00772559	0	0.000844694	0	0	0.00063921	0.00966856	0.0011359	0.00801648	0.00177644	0.00314577
Candidatus Midichloriaceae	0	0.00263807	0	0.00484152	0	0.00549591	0	0.00400824	0	0.000594937	0	0	0.00988484	0.00721813	0	0.00372148	0	0	0.00213351	0.00305588	0	0	0	0	0	0.00129379	0.00130058	0.00553169	0	0	0	0	0	0.000594937	0	0.00580114	0	0.00400824	0.00102947	0.00195481
Actinopolysporaceae	0	0.00527614	0.000593162	0.00484152	0	0.00549591	0	0.00320659	0.00390528	0.00118987	0	0	0	0.00433088	0.000663596	0.00744297	0	0.00127842	0.00212358	0.0024715	0.00051594	0.00051594	0	0.000908043	0.000663596	0.00388138	0.00390173	0.00368779	0	0	0.00390528	0	0.000908043	0.00118987	0.00127842	0.00580114	0	0.00320659	0.00168688	0.00183955
Jonesiaceae	0	0.0039571	0.000593162	0.00322768	0.00168939	0.00366394	0.00127684	0.00561154	0	0.000594937	0	0	0.0123561	0	0	0.00372148	0.00127684	0	0.00210939	0.00310825	0.00103188	0.00103188	0	0	0	0.00388138	0.0052023	0	0.00199442	0	0	0.00168939	0	0.000594937	0	0.0116023	0	0.00561154	0.00181333	0.00305209
Candidatus Babeliaceae	0.00213197	0.00131903	0	0.00322768	0	0.00366394	0.000638419	0.00400824	0	0	0	0	0.00494242	0.00288725	0.000663596	0.00930371	0.000638419	0	0.00185693	0.00248175	0.00154782	0.00154782	0	0.000908043	0.000663596	0.00258759	0.00130058	0.0018439	0.00199442	0.00772559	0	0	0.000908043	0	0	0.00580114	0	0.00400824	0.00171315	0.00215872
Coprothermobacteraceae	0	0.00527614	0	0.00322768	0	0.00366394	0	0.00400824	0	0	0	0	0.00741363	0.00577451	0	0.00372148	0	0	0.00183809	0.00253317	0	0	0	0	0	0.00129379	0.00130058	0	0	0.00772559	0	0	0	0	0	0.00966856	0	0.00400824	0.00133315	0.00287592
Gloeomargaritaceae	0.00213197	0.0039571	0	0.00161384	0	0.00183197	0	0.00480989	0	0.000594937	0.00135115	0.0011359	0.00741363	0.00433088	0	0.00372148	0	0	0.00182738	0.00217242	0.00103188	0.00103188	0.00135115	0	0	0.00129379	0	0	0	0	0	0	0	0.000594937	0	0.00386742	0.0011359	0.00480989	0.000839825	0.00138627
Candidatus Desulfofervidaceae	0	0.00263807	0.000593162	0.00161384	0	0.00183197	0.000638419	0.00320659	0	0	0.00135115	0.0022718	0.00988484	0	0	0.00744297	0.000638419	0.00063921	0.00181947	0.00271471	0.00051594	0.00051594	0.00135115	0	0	0.00517518	0.00130058	0	0.00398883	0	0	0	0	0	0.00063921	0.00580114	0.0022718	0.00320659	0.00137591	0.00191237
Simkaniaceae	0.00213197	0.0039571	0	0	0.000844694	0.00183197	0.00127684	0.00480989	0	0	0	0	0.00494242	0.00577451	0	0	0.00127684	0.00127842	0.00156248	0.00197234	0	0	0	0.000908043	0	0	0.00260115	0.00553169	0.00398883	0	0	0.000844694	0.000908043	0	0.00127842	0.00193371	0	0.00480989	0.00126692	0.00180288
Acidimicrobiaceae	0	0.00263807	0	0.00484152	0	0.00549591	0	0.00641319	0	0	0	0	0.00494242	0.00288725	0	0	0	0	0.00151213	0.0023432	0	0	0	0	0	0.00517518	0.00130058	0.00368779	0.00199442	0	0	0	0	0	0	0.00580114	0	0.00641319	0.00135402	0.00227303
Parvularculaceae	0	0.00131903	0	0	0.000844694	0	0.00127684	0.00561154	0.00130176	0	0.00135115	0.0022718	0.00741363	0.00144363	0.00265439	0	0.00127684	0	0.00148696	0.00203177	0.00154782	0.00154782	0.00135115	0.000908043	0.00265439	0.00258759	0.00130058	0.00553169	0	0.00772559	0.00130176	0.000844694	0.000908043	0	0	0.00773485	0.0022718	0.00561154	0.00243485	0.0024989
Segniliparaceae	0	0.00131903	0.00177949	0.00322768	0	0.00366394	0	0.00240494	0.000650881	0.000594937	0	0	0	0.00288725	0	0.00930371	0	0	0.0014351	0.00234061	0.00154782	0.00154782	0	0.000908043	0	0.00646897	0.00130058	0.00368779	0.00398883	0	0.000650881	0	0.000908043	0.000594937	0	0.00580114	0	0.00240494	0.0016561	0.00203407
Caedimonadaceae	0	0.0039571	0	0.00161384	0	0.00183197	0	0.00480989	0	0.000594937	0.0027023	0	0.00494242	0.00144363	0	0.00372148	0	0	0.0014232	0.00182003	0.00051594	0.00051594	0.0027023	0	0	0	0	0.0018439	0.00199442	0	0	0	0	0.000594937	0	0.00773485	0	0.00480989	0.00115068	0.00209616
Candidatus Paracaedibacteraceae	0	0.0039571	0.00118632	0.00161384	0	0.00183197	0.000638419	0.00400824	0	0	0.0027023	0.0011359	0	0.00288725	0	0.00372148	0.000638419	0.00063921	0.00138669	0.00146493	0.00051594	0.00051594	0.0027023	0	0	0.00258759	0.00260115	0.00368779	0.00199442	0.00772559	0	0	0	0	0.00063921	0.0116023	0.0011359	0.00400824	0.00220646	0.00309937
Cuniculiplasmataceae	0	0	0	0.00322768	0.000844694	0.00366394	0	0	0	0.000594937	0	0	0	0.00433088	0.000663596	0.00186074	0	0	0.000843693	0.00142986	0.00103188	0.00103188	0	0	0.000663596	0.00258759	0	0	0.00199442	0	0	0.000844694	0	0.000594937	0	0.00773485	0	0	0.000915769	0.00186363

## Sheet: Kraken_Bacteria_Genus
Taxa	TRZ1429	TRZ1464	TRZ1469	TRZ1474	TRZ1480	TRZ505	TRZ511	TRZ531	TRZ562	TRZ577	TRZ578	TRZ674	TRZ677	TRZ679	TRZ689	TRZ718	TRZ728	TRZ721	Lushoto (Mean)	Lushoto (SD)	TMP17787	TMP17871	TMP17852	TMP17811	TMP17800	TMP17921	TMP17909	TMP17891	TMP17788	TMP17926	TMP17982	TMP18001	TMP18016	TMP18023	TMP18027	TMP18032	TMP18046	TMP18060	Rungwe (Mean)	Rungwe (SD)
Pseudomonas	8.12233	3.57315	85.1009	19.7062	45.1511	14.5305	48.345	3.25992	48.4974	60.7627	50.5382	46.7372	5.2681	1.73162	76.7023	1.79468	48.345	27.8724	33.1133	26.9902	43.5702	43.5702	50.5013	42.7866	76.6822	10.5735	13.9822	13.5656	5.77904	1.29055	48.4691	45.129	42.7866	60.745	27.8662	1.85899	46.7198	3.24765	32.1735	22.7928
Comamonas	5.20696	0.864666	0.894184	3.59165	22.8831	4.24153	20.0273	0.250831	19.1311	7.62044	4.27652	12.7893	0.0724968	0.0442326	4.88233	0.100872	20.0273	2.07511	7.16554	8.02681	11.3558	11.3558	4.2734	23.8238	4.88105	5.99842	9.71802	7.34394	4.82232	0.0448109	19.1199	22.8719	23.8238	7.61822	2.07465	0.603516	12.7845	0.249887	9.59799	8.04208
Acinetobacter	40.211	16.5311	0.0179076	14.6587	0.13824	25.4177	0.154796	0.482163	0.740362	0.691993	1.60559	1.05345	0.467202	0.566832	0.0651693	11.3502	0.154796	0.0770009	6.35468	11.2685	10.7374	10.7374	1.60442	0.175328	0.0651523	30.4052	25.7507	11.8746	30.3945	1.49668	0.739929	0.138172	0.175328	0.691791	0.0769838	0.863896	1.05306	0.480349	7.08116	10.8151
Jatrophihabitans	0.121294	0.0828513	0.022086	0.0544689	1.3719	0.0833488	1.60461	0.237536	1.39801	1.34747	3.94438	14.3467	0.077867	0.0753592	5.37412	0.0714511	1.60461	47.4208	4.40216	11.2749	0	0	0.00413155	0.000942623	0.00201502	0.00263089	0.00397899	0.00377872	0.0040798	0	0.000672052	0	0.000942623	0.00121687	0.000652405	0.0040369	0	0.00441497	0.00186074	0.0017558
Prevotella	3.26843	2.52621	0.0692426	13.3465	0.027123	8.88683	0.110662	2.92222	0.0127765	0.0718163	0.106121	0.244448	3.04487	3.4911	0.0470294	2.0973	0.110662	0.0508989	2.24635	3.57975	0.203668	0.203668	0.106043	0.0263934	0.0470171	8.26625	4.30129	10.8298	12.1292	2.90375	0.012769	0.0271098	0.0263934	0.0717954	0.0508876	3.13667	0.244357	2.91123	2.52769	3.93433
Bacteroides	0.554485	5.8252	0.0996854	2.10613	0.0857438	1.41878	0.328035	6.07489	0.0813659	0.3816	0.483744	0.3981	6.50861	7.26725	0.160572	4.56657	0.328035	0.647982	2.07315	2.62881	0.492814	0.492814	0.483391	0.0754098	0.16053	1.48908	0.989442	1.97816	2.06642	6.36315	0.0813183	0.0857018	0.0754098	0.381489	0.647838	6.37022	0.397952	6.05204	1.59351	2.23427
Escherichia	0.049817	7.77145	0.0125353	0.127094	0.041997	0.0926097	0.0276656	3.71992	0.0652272	0.253183	0.0399675	0.0384132	2.59646	4.53957	0.0174681	6.67858	0.0276656	0.281249	1.4656	2.51704	0.197864	0.197864	0.0399383	0.0292213	0.0174635	0.0894501	0.112738	0.156817	0.112195	5.24288	0.065189	0.0419764	0.0292213	0.253109	0.281187	0.125144	0.0383989	3.70593	0.596477	1.43739
Acidovorax	0.898872	0.161183	0.289506	0.612363	3.78848	0.727913	3.67492	0.159539	3.64533	1.60796	1.0805	2.35834	0.0805521	0.104848	1.06085	0.0672481	3.67492	1.77755	1.43171	1.39799	2.03457	2.03457	1.07971	4.33229	1.06057	0.890555	1.28919	1.03159	0.660928	0.0896218	3.64319	3.78662	4.33229	1.60749	1.77715	0.139273	2.35746	0.158939	1.79478	1.39421
Stenotrophomonas	2.72694	0.19583	0.37785	0.523232	0.515338	1.45953	1.36681	0.990029	0.706067	6.88585	4.55216	1.2816	0.171844	0.160548	1.25636	0.161816	1.36681	0.23035	1.38494	1.75682	6.81075	6.81075	4.54883	3.06447	1.25603	1.54038	2.23089	0.529021	0.942434	0.116508	0.705655	0.515085	3.06447	6.88384	0.230299	0.191753	1.28113	0.986305	2.31714	2.38333
Clostridium	0.28374	2.13455	0.210712	0.722951	0.472466	0.527876	0.193001	3.11279	0.0706067	0.173455	0.345925	0.477255	4.54314	3.46161	0.429983	3.46538	0.193001	0.396098	1.17858	1.45162	1.47211	1.47211	0.345673	0.149877	0.429871	0.640621	0.381983	0.810535	0.603811	6.7306	0.0705655	0.472234	0.149877	0.173404	0.39601	3.65339	0.477077	3.10108	1.19616	1.70491
Bacillus	0.251251	1.86792	0.0579011	0.54634	0.27298	0.414892	0.144256	2.33902	0.0874179	0.122331	0.227401	0.208362	2.3011	2.74897	0.129667	3.14805	0.144256	0.16118	0.842961	1.07773	0.186256	0.186256	0.227235	0.0631557	0.129633	0.49066	0.293119	0.553582	0.487536	3.3877	0.0873668	0.272847	0.0631557	0.122296	0.161144	2.60985	0.208285	2.33022	0.658906	1.00253
Alistipes	0.249085	2.73259	0.029249	0.840142	0.0244982	0.577885	0.103417	2.3532	0.0168111	0.0383426	0.044102	0.109419	2.28499	2.73914	0.0658412	1.66439	0.103417	0.0195765	0.777561	1.05052	0.242186	0.242186	0.0440699	0.0122541	0.0658239	0.640621	0.507985	0.867216	0.901636	2.45564	0.0168013	0.0244862	0.0122541	0.0383314	0.0195722	3.27998	0.109379	2.34435	0.656931	0.996711
Brevundimonas	1.96236	0.0677874	0.0310398	0.11554	0.354349	0.903871	0.185755	3.79526	2.70659	2.06198	0.224645	0.108255	0.077867	0.0786357	0.201555	0.0882631	0.185755	0.62449	0.765222	1.10707	0.433718	0.433718	0.224481	0.186639	0.201502	0.249934	0.388615	0.124698	0.142793	0.0448109	2.70501	0.354176	0.186639	2.06138	0.624352	0.0787195	0.108215	3.78098	0.685021	1.04985
Paenibacillus	0.132123	1.87395	0.0865532	0.453908	0.151364	0.311169	0.113297	2.06426	0.101539	0.107725	0.213619	0.168785	2.25814	2.33122	0.0819656	2.50079	0.113297	0.214036	0.737652	0.94841	0.109221	0.109221	0.213463	0.0942623	0.0819441	0.315706	0.23476	0.425106	0.440618	2.18677	0.10148	0.15129	0.0942623	0.107693	0.213989	1.63494	0.168722	2.05649	0.485553	0.693799
Delftia	0.526327	0.0843577	0.170719	0.270694	1.82424	0.377848	1.53939	0.0700199	1.77593	0.747377	0.576083	1.15705	0.0322208	0.0278501	0.477685	0.033624	1.53939	1.15828	0.688283	0.643073	0.965577	0.965577	0.575662	1.82963	0.477559	0.593265	0.527879	0.438331	0.424299	0.0179244	1.77489	1.82335	1.82963	0.747159	1.15802	0.0343136	1.15662	0.0697566	0.85608	0.625371
Aeromonas	3.68212	0.206375	0.0179076	2.34547	0.122491	2.89128	0.0922187	0.216264	0.104901	0.0572096	1.43194	0.0768264	0.233601	0.271948	0.0564353	0.21015	0.0922187	0.0541616	0.675751	1.12643	0.0722864	0.0722864	1.43089	0.101803	0.0564205	3.34649	7.2537	6.10074	2.63963	0.188206	0.10484	0.122431	0.101803	0.0571929	0.0541496	0.268454	0.0767978	0.215451	1.23687	2.20612
Solibacillus	0.173276	1.66154	0.00179076	0.211273	0.106742	0.192628	0.022396	2.24241	0.00537956	0.00182584	0.0179165	0.00698422	1.1143	2.75716	0.00335924	3.48429	0.022396	0.0065255	0.668456	1.10759	0.0042211	0.0042211	0.0179034	0.000942623	0.00335836	0.196001	0.185686	0.0415659	0.0958753	5.53863	0.00537642	0.10669	0.000942623	0.00182531	0.00652405	0.752881	0.00698162	2.23398	0.511311	1.3639
Acholeplasma	0.0173276	0.0708002	0.120578	0.0742758	1.86274	0.0500093	2.44116	0.109905	0.632098	1.66577	1.60421	0.00931229	0.123513	0.113039	0.0510605	0.0798571	2.44116	0.0182714	0.638061	0.903763	0.299698	0.299698	1.60304	0.147992	0.0510471	0.169692	0.0676428	0.0604595	0.0530374	0.20613	0.631729	1.86183	0.147992	1.66529	0.0182673	0.183679	0.00930882	0.109491	0.421446	0.611932
Chryseobacterium	1.72843	0.668836	0.0423812	0.323512	0.0874937	0.920541	0.298393	0.8039	0.240063	0.251357	0.793837	0.334078	0.961254	0.892843	0.125636	0.647263	0.298393	1.84998	0.626011	0.520609	0.105528	0.105528	0.793257	0.279016	0.125603	0.74191	0.554406	0.402433	0.348823	0.815558	0.239923	0.0874508	0.279016	0.251284	1.84957	1.00115	0.333954	0.800876	0.506405	0.44179
Shewanella	1.16528	0.224452	0.128338	0.533135	0.522337	0.798296	0.135035	0.272103	0.125747	0.260486	4.4419	1.33981	0.263137	0.273587	0.0564353	0.216455	0.135035	0.224477	0.617558	1.02091	0.0743969	0.0743969	4.43866	0.115943	0.0564205	0.916864	2.78927	0.425106	0.342703	0.259903	0.125674	0.522081	0.115943	0.26041	0.224427	0.401671	1.33931	0.271079	0.70857	1.14087
Streptomyces	0.470012	1.09062	0.0823748	1.1389	0.290479	0.840896	0.297735	1.19654	0.351016	0.273876	0.296311	0.229315	1.15995	1.38432	0.153182	1.1159	0.297735	0.32497	0.610785	0.445527	0.195226	0.195226	0.296094	0.226229	0.153141	1.00895	0.758661	1.33956	1.2423	0.690088	0.350811	0.290337	0.226229	0.273796	0.324898	1.36245	0.22923	1.19204	0.575292	0.450983
Hafnia	0.00866382	0.027115	8.6786	0.0825287	0.790068	0.0500093	0.00724576	0.0248172	0.0100867	0.815542	0.0275638	0.0849746	0.0322208	0.0212972	0.00470294	0.0189135	0.00724576	0.00195765	0.594086	2.03319	0.0121357	0.0121357	0.0275437	0.00377049	0.00470171	0.0249934	0.0450952	0.0906892	0.0795561	0	0.0100808	0.789681	0.00377049	0.815303	0.00195722	0.0242214	0.084943	0.0247238	0.114183	0.252105
Flavobacterium	0.68011	0.489576	0.0101476	0.189816	0.13824	0.398222	0.597446	0.709063	0.601166	0.303698	1.26104	0.364343	0.730339	0.563556	0.354064	0.48965	0.597446	0.216647	0.483032	0.284151	0.136658	0.136658	1.26012	0.526926	0.353972	0.44462	0.359436	0.292851	0.238668	0.708012	0.600815	0.138172	0.526926	0.303609	0.216598	0.861878	0.364208	0.706396	0.454251	0.292674
Ruminococcus	0.0584808	1.30453	0.0214891	0.189816	0.0384972	0.131506	0.0652118	1.34899	0.00470712	0.0206928	0.0399675	0.0733343	1.6003	1.57927	0.0275458	1.36808	0.0652118	0.0247969	0.442357	0.641782	0.0390452	0.0390452	0.0399383	0.00471311	0.0275386	0.148645	0.0822325	0.194604	0.21011	1.59527	0.00470436	0.0384784	0.00471311	0.0206868	0.0247914	1.83679	0.073307	1.34392	0.318251	0.59537
Faecalibacterium	0.0433191	1.40697	0.0185045	0.133696	0.0262481	0.0944619	0.0349114	1.44826	0.00874179	0.0158239	0.0316983	0.0547097	1.46068	1.60875	0.0201555	1.47315	0.0349114	0.0143561	0.440519	0.664783	0.0474874	0.0474874	0.0316752	0.0131967	0.0201502	0.106551	0.115391	0.153038	0.152993	1.19197	0.00873668	0.0262352	0.0131967	0.0158193	0.0143529	1.45126	0.0546893	1.44281	0.272614	0.506018
Kluyvera	0.31623	0.212401	0.0161168	2.37848	0.055121	1.47064	0.0520377	0.260581	0.0511058	0.0438201	0.0978514	0.0500535	2.28768	0.304713	0.0322487	0.166019	0.0520377	0.0528565	0.438888	0.764999	0.00949748	0.00949748	0.0110175	0.00659836	0.00134335	0.0578795	0.0729482	0.026451	0.106075	0	0.00806462	0.00787057	0.00659836	0.00669279	0	0.0121107	0.00581801	0.0132449	0.0200949	0.0289756
Lysinimonas	0.229591	0.659798	0.0393966	0.165057	0.251982	0.190776	0.0303004	1.25947	0.0255529	0.0164326	0.028942	0.0128044	0.684692	1.40234	0.0214992	2.6626	0.0303004	0.0345851	0.43034	0.702925	0.00211055	0.00211055	0.00550873	0.00188525	0.000671673	0.0092081	0.00530532	0.00377872	0.0101995	0.00896218	0.000672052	0.000874508	0.00188525	0.00182531	0.000652405	0.00807379	0.0011636	0.0167769	0.00453691	0.00447774
Myroides	4.79976	0.0723066	0.000596919	0.034662	0.0096243	2.07261	0.0270069	0.054066	0.036312	0.0334737	0.0647749	0.00698422	0.0966625	0.0720827	0.0114214	0.0504361	0.0270069	0.0287122	0.416583	1.19423	0.0142462	0.0142462	0.0647276	0.0188525	0.0114184	0.397264	1.46427	0.11903	0.146873	0.107546	0.0362908	0.00961959	0.0188525	0.0334639	0.0287058	0.0807379	0.00698162	0.0538627	0.145944	0.341629
Sphingobacterium	1.99051	0.248554	0.0095507	0.089131	0.083119	0.902019	0.221984	0.275648	0.221234	0.10955	0.213619	0.356195	0.316838	0.263757	0.125636	0.2795	0.221984	1.12173	0.391698	0.48634	0.0865326	0.0865326	0.213463	0.383647	0.125603	0.235464	0.360762	0.139813	0.173392	0.241979	0.221105	0.0830783	0.383647	0.109518	1.12148	0.333044	0.356062	0.274611	0.273874	0.23676
Enterobacter	0.504668	0.207881	0.0208922	2.56004	0.118116	1.65216	0.0955122	0.288943	0.0954872	0.0584269	0.0992296	0.109419	0.257767	0.344031	0.0450139	0.180729	0.0955122	0.0365428	0.376132	0.660039	0.0807286	0.0807286	0.0991572	0.11877	0.0450021	1.04052	0.850178	2.59031	1.16478	0.143395	0.0954314	0.118059	0.11877	0.0584098	0.0365347	0.201845	0.109379	0.287856	0.402214	0.650654
Variovorax	0.164613	0.0843577	0.107445	0.151853	0.699949	0.155584	0.618524	0.174607	0.853333	0.488108	0.533359	0.547097	0.0537014	0.0868269	0.287551	0.0693496	0.618524	0.82417	0.362164	0.281283	0.43108	0.43108	0.53297	0.873811	0.287476	0.194686	0.22415	0.196493	0.189711	0.0627353	0.852834	0.699606	0.873811	0.487965	0.823988	0.0948671	0.546893	0.17395	0.443228	0.283694
Lacimicrobium	0.0736425	0.983671	0.0614826	0.198069	0.0839939	0.142619	0.0368875	0.946599	0.0147938	0.0444288	0.0482366	0.143176	1.18412	1.23687	0.0900277	1.01292	0.0368875	0.100493	0.357718	0.462736	0.000527638	0.000527638	0.0165262	0.00377049	0.000671673	0.00263089	0.00795798	0.00566808	0.0101995	0.0179244	0.0013441	0.00174902	0.00377049	0.000608435	0.00260962	0.0201845	0	0.0141279	0.00615547	0.00671822
Hydrogenophilus	0.151617	0.0632683	0.0614826	0.141949	0.851313	0.144471	0.779907	0.0735653	0.773312	0.368211	0.480988	0.528472	0.0644416	0.0638915	0.225741	0.0441316	0.779907	0.32236	0.328835	0.295191	0.000527638	0.000527638	0.00275437	0.00188525	0.00268669	0.00131544	0	0.00188936	0.0040798	0.0179244	0.00403231	0.00174902	0.00188525	0.00182531	0.00130481	0.00605535	0	0.00618096	0.00314575	0.00410737
Burkholderia	0.225259	0.334418	0.0859563	0.389535	0.387597	0.314873	0.353066	0.385553	0.417588	0.288483	0.35006	0.301485	0.410815	0.368605	0.174009	0.329936	0.353066	0.411106	0.326745	0.0878306	0.224246	0.224246	0.349804	0.436434	0.173963	0.367009	0.32893	0.415659	0.354943	0.250941	0.417344	0.387407	0.436434	0.288398	0.411015	0.397634	0.301373	0.384103	0.34166	0.0805996
Rhodoferax	0.164613	0.0497108	0.0507381	0.108938	0.875812	0.131506	0.776613	0.0531797	0.811641	0.347518	0.26599	0.540113	0.0590715	0.0442326	0.2291	0.037827	0.776613	0.2558	0.309945	0.304384	0.437939	0.437939	0.265796	0.920942	0.22904	0.139437	0.286487	0.179489	0.155032	0.0358487	0.811167	0.875383	0.920942	0.347417	0.255743	0.0645904	0.539912	0.0529797	0.386449	0.305124
Cupriavidus	0.149451	0.177754	0.0764056	0.189816	0.529337	0.170402	0.461752	0.218037	0.572251	0.331694	0.3349	0.388788	0.19601	0.153995	0.198195	0.155511	0.461752	0.445692	0.289541	0.152438	0.324497	0.324497	0.334655	0.513729	0.198143	0.213102	0.259961	0.238059	0.185631	0.0716974	0.571916	0.529077	0.513729	0.331597	0.445593	0.222029	0.388643	0.217217	0.326876	0.141157
Streptococcus	0.119128	0.697457	0.0262644	0.232731	0.0516213	0.181515	0.0671879	0.804786	0.0295876	0.0389512	0.0799349	0.0768264	0.875332	0.953458	0.0557635	0.701902	0.0671879	0.100493	0.286674	0.33993	0.0680653	0.0680653	0.0798766	0.104631	0.0557488	0.211786	0.188339	0.304187	0.246828	0.949991	0.0295703	0.051596	0.104631	0.0389399	0.10047	1.07987	0.0767978	0.801759	0.253397	0.329983
Blautia	0.0324893	0.914377	0.0173106	0.155154	0.0314977	0.101871	0.0362288	0.836694	0.00605201	0.0170412	0.028942	0.0570378	0.934404	1.01899	0.0429983	0.764947	0.0362288	0.0358902	0.281564	0.395021	0.0474874	0.0474874	0.0289208	0.0103688	0.0429871	0.0631413	0.0888641	0.132255	0.148913	1.17405	0.00604847	0.0314823	0.0103688	0.0170362	0.0358823	1.21712	0.0570165	0.833547	0.221832	0.401
Lactococcus	0.0931361	0.616112	0.0268613	0.278947	0.0568709	0.196333	0.0619183	0.753379	0.0174836	0.0450374	0.0744222	0.065186	0.851167	0.860078	0.0450139	0.790165	0.0619183	0.0502463	0.274682	0.328184	0.0569849	0.0569849	0.214841	0.00377049	0.00806007	0.0315706	0.0583585	0.11714	0.0856758	0.170281	0.000672052	0.0690861	0.00377049	0.00790966	0.00652405	0.155421	0.0209448	0.10331	0.0650725	0.0646851
Flavonifractor	0.0303234	0.820981	0.0137291	0.103986	0.0183737	0.0722356	0.011198	0.853534	0.00470712	0.0127809	0.022051	0.031429	1.00422	1.06813	0.0100777	0.842703	0.011198	0.0104408	0.274561	0.41478	0.0226884	0.0226884	0.0220349	0.00282787	0.0100751	0.0815575	0.0809061	0.130366	0.106075	0.77971	0.00470436	0.0183647	0.00282787	0.0127771	0.0104385	0.873988	0.0314173	0.850324	0.170209	0.308513
Muribaculum	0.095302	0.766751	0.00775994	0.440703	0.00349975	0.288942	0.0329353	0.762242	0.00605201	0.0206928	0.0399675	0.0500535	0.792095	0.935437	0.0214992	0.559	0.0329353	0.0123984	0.270459	0.339672	0.0675376	0.0675376	0.0399383	0.00471311	0.0214935	0.29729	0.187013	0.461004	0.40186	0.672163	0.00604847	0.00349803	0.00471311	0.0206868	0.0123957	0.829582	0.0500349	0.759375	0.217049	0.284957
Bordetella	0.142953	0.12503	0.0907316	0.130395	0.567834	0.13521	0.395223	0.210946	0.502317	0.297612	0.260478	0.358523	0.150364	0.152357	0.17065	0.147105	0.395223	0.385657	0.256589	0.144798	0.299171	0.299171	0.260288	0.441147	0.170605	0.155222	0.196297	0.194604	0.157072	0.143395	0.502023	0.567556	0.441147	0.297525	0.385571	0.18166	0.35839	0.210153	0.292278	0.130628
Achromobacter	0.160281	0.0994215	0.0799871	0.165057	0.428719	0.161141	0.440015	0.172834	0.531232	0.370037	0.226023	0.309634	0.110088	0.113039	0.194164	0.115583	0.440015	0.501158	0.256579	0.154215	0.269095	0.269095	0.225858	0.523156	0.194113	0.140752	0.176402	0.153038	0.161152	0.0179244	0.530921	0.428509	0.523156	0.369929	0.501047	0.16955	0.309518	0.172184	0.2853	0.157928
Rheinheimera	2.8439	0.0120511	0.000596919	0.011554	0.00787443	1.22245	0.00658705	0.0115223	0.00134489	0.00365168	0.230158	0.00232807	0.0241656	0.0196589	0.0026874	0.012609	0.00658705	0.00065255	0.245576	0.709237	0.0042211	0.0042211	0.22999	0.0113115	0.00268669	0.115759	1.08759	0.102025	0.0387581	0.0537731	0.0013441	0.00787057	0.0113115	0.00365061	0.000652405	0.0201845	0.00232721	0.0114789	0.0949531	0.254672
Oscillibacter	0.0303234	0.677874	0.0101476	0.0924321	0.013124	0.0648268	0.0151502	0.753379	0.00336223	0.0115636	0.0110255	0.0256088	0.891443	0.943628	0.013437	0.788063	0.0151502	0.0091357	0.24276	0.366866	0.0232161	0.0232161	0.0110175	0.00942623	0.0134335	0.0578795	0.0450952	0.107693	0.0652768	0.654239	0.00336026	0.0131176	0.00942623	0.0115603	0.00913367	0.853804	0.0255993	0.750545	0.14928	0.281076
Megamonas	0.70177	0.111473	0.029249	0.148552	0.248482	0.383404	0.307615	0.168402	0.245443	0.14059	0.438264	0.342227	0.169159	0.140889	0.108168	0.138699	0.307615	0.23296	0.242387	0.157094	0.00316583	0.00316583	0.00137718	0.000942623	0.00201502	0.0092081	0.00530532	0.0132255	0.0061197	0.0537731	0	0.00349803	0.000942623	0.00304218	0.00195722	0.0746826	0.00232721	0.0370858	0.0123241	0.0209962
Corynebacterium	0.119128	0.539287	0.0256675	0.269043	0.097118	0.201889	0.0790446	0.608021	0.0726241	0.0438201	0.073044	0.0744983	0.649787	0.712636	0.0396391	0.609436	0.0790446	0.0430683	0.240933	0.253047	0.0754522	0.0754522	0.0729907	0.0810655	0.0396287	0.205209	0.167118	0.272068	0.246828	0.510844	0.0725816	0.0970704	0.0810655	0.0438073	0.0430587	0.720586	0.0744706	0.605734	0.193613	0.207619
Enterococcus	0.0238255	0.247047	0.0322336	0.0990344	0.0376223	0.066679	0.022396	0.553955	0.0369845	0.0261704	0.0344547	0.0279369	0.802835	0.655297	0.0389672	1.20836	0.022396	0.0828738	0.223282	0.346011	0.078618	0.078618	0.0344296	0.00942623	0.038957	0.105235	0.0742745	0.0906892	0.118314	0.376412	0.0369629	0.0376038	0.00942623	0.0261627	0.0828554	0.339099	0.0279265	0.551872	0.117605	0.149006
Pantoea	0.357383	0.115992	0.0119384	1.50697	0.0629954	0.998333	0.0731163	0.1037	0.0504334	0.0286048	0.103364	0.0477255	0.126198	0.113039	0.0275458	0.117684	0.0731163	0.0182714	0.21869	0.393587	0.0501256	0.0501256	0.103289	0.0867213	0.0275386	0.486714	0.395246	0.672612	1.14846	0.116508	0.0504039	0.0629646	0.0867213	0.0285965	0.0182673	0.133218	0.0477077	0.10331	0.203807	0.297067
Vibrio	0.168945	0.394673	0.0256675	0.174961	0.129491	0.170402	0.124495	0.460004	0.106246	0.0693819	0.39554	0.097779	0.512848	0.42922	0.0470294	0.397184	0.124495	0.046331	0.215261	0.164744	0.0997235	0.0997235	0.395251	0.126311	0.0470171	0.177585	0.20956	0.198383	0.167272	0.519806	0.106184	0.129427	0.126311	0.0693616	0.0463208	0.563147	0.0977426	0.458274	0.202078	0.164472
Butyrivibrio	0.151617	0.405218	0.0107445	0.873153	0.013124	0.555658	0.0151502	0.370485	0.00134489	0.0127809	0.0165383	0.0302649	0.510163	0.481643	0.0194836	0.332037	0.0151502	0.0143561	0.212717	0.264164	0.0237437	0.0237437	0.0165262	0.00754098	0.0194785	0.402526	0.20956	0.670722	0.395741	0.528769	0.0013441	0.0131176	0.00754098	0.0127771	0.0143529	0.631774	0.0302537	0.369092	0.1877	0.24212
Staphylococcus	0.0844723	0.350988	0.0238767	0.211273	0.0603706	0.155584	0.0480855	0.544206	0.0268978	0.029822	0.0716658	0.0698422	0.636361	0.627447	0.0403109	0.61574	0.0480855	0.0385004	0.204641	0.235508	0.0527638	0.0527638	0.0716135	0.0282787	0.0403004	0.1789	0.116717	0.215387	0.261107	0.770747	0.0268821	0.0603411	0.0282787	0.0298133	0.0384919	0.78114	0.0698162	0.542159	0.186972	0.249073
Polaromonas	0.0888042	0.0286214	0.0352182	0.0858298	0.537211	0.0870532	0.518401	0.0478617	0.501644	0.208146	0.170895	0.330586	0.0187955	0.0360413	0.135713	0.0231165	0.518401	0.224477	0.199823	0.193875	0.269095	0.269095	0.170771	0.667377	0.135678	0.110497	0.149875	0.143591	0.128514	0.00896218	0.501351	0.536948	0.667377	0.208085	0.224427	0.0423874	0.330463	0.0476817	0.256232	0.205782
Melioribacter	0.155949	0.0135575	0.0477535	0.0957333	0.526712	0.120393	0.461094	0.0354531	0.490885	0.211797	0.162626	0.301485	0.0241656	0.0196589	0.133698	0.0147105	0.461094	0.28908	0.198102	0.180479	0.000527638	0.000527638	0.00137718	0	0	0.00131544	0	0.00566808	0.0081596	0.0179244	0	0	0	0.00182531	0	0.00807379	0.0011636	0.0176599	0.00356792	0.00582477
Intrasporangium	0.0173276	0.616112	0.00596919	0.0676735	0.0113742	0.0463049	0.00988058	0.592954	0.00268978	0.00365168	0.00689094	0.0209526	0.630991	0.694615	0.00940588	0.613639	0.00988058	0.00848315	0.187155	0.28346	0	0	0	0	0.000671673	0.0092081	0.00530532	0.0113362	0.0040798	0	0	0	0	0.00121687	0.000652405	0.0121107	0.0011636	0.0123619	0.00322814	0.0046886
Kosmotoga	0.125625	0.0361533	0.00119384	0.468763	0.0218734	0.316725	0.0368875	0.877465	0.0188285	0.0146067	0.0427239	0.0197886	0.0886073	1.15005	0.0107496	0.0630451	0.0368875	0.00456785	0.185252	0.328088	0	0	0	0.00188525	0	0.00263089	0.00132633	0.00188936	0.0040798	0	0	0.000874508	0.00188525	0.000608435	0.00130481	0.0222029	0	0.0132449	0.00288514	0.00572614
Porphyromonas	0.0433191	0.50464	0.0113415	0.191467	0.0122491	0.125949	0.0256895	0.49723	0.0073969	0.0511235	0.0372111	0.0279369	0.617566	0.674956	0.0100777	0.407691	0.0256895	0.0123984	0.182441	0.238504	0.0300753	0.0300753	0.0371839	0.00377049	0.0100751	0.156538	0.111412	0.226723	0.167272	0.403298	0.00739257	0.0122431	0.00377049	0.0511086	0.0123957	0.61159	0.0279265	0.49536	0.133234	0.18565
Pedobacter	0.147285	0.177754	0.00775994	0.0577701	0.0489964	0.0963141	0.262165	0.252604	0.389346	0.244054	0.278394	0.104763	0.163789	0.185121	0.124292	0.149207	0.262165	0.266893	0.178815	0.0981466	0.0459045	0.0459045	0.278191	0.262992	0.124259	0.0499868	0.0504006	0.102025	0.0652768	0.233017	0.389118	0.0489725	0.262992	0.243983	0.266834	0.220011	0.104724	0.251653	0.169236	0.10876
Capnocytophaga	0.0909701	0.427814	0.00537227	0.196418	0.0157489	0.150028	0.0612596	0.381121	0.0282427	0.0371254	0.110255	0.0395772	0.558494	0.445602	0.0275458	0.355154	0.0612596	0.0515514	0.169086	0.179334	0.0385175	0.0385175	0.110175	0.0216803	0.0275386	0.153907	0.111412	0.183268	0.132594	0.331601	0.0282262	0.0157411	0.0216803	0.0371146	0.05154	0.599479	0.0395625	0.379688	0.129013	0.158042
Xanthomonas	0.37471	0.112979	0.0268613	0.196418	0.145239	0.27042	0.165335	0.196765	0.160714	0.22397	0.199837	0.143176	0.150364	0.142527	0.100777	0.161816	0.165335	0.101145	0.168799	0.0740129	0.171482	0.171482	0.199692	0.225287	0.100751	0.38674	0.241392	0.35331	0.236628	0.20613	0.16062	0.145168	0.225287	0.223904	0.101123	0.149365	0.143123	0.196025	0.202084	0.0747018
Eubacterium	0.047651	0.476018	0.0119384	0.176611	0.0166238	0.120393	0.0144915	0.467095	0.000672445	0.00547752	0.0179165	0.0349211	0.550439	0.535706	0.0228429	0.462331	0.0144915	0.020229	0.166436	0.217088	0.0321859	0.0321859	0.0179034	0.00754098	0.0228369	0.110497	0.0649902	0.151149	0.140753	0.582542	0.000672052	0.0166157	0.00754098	0.00547592	0.0202246	0.660033	0.0349081	0.465338	0.131855	0.20901
Limnospira	0.0779744	0.0241022	0.0196983	0.0660229	0.540711	0.0703834	0.467681	0.0168402	0.447849	0.176498	0.0937168	0.273548	0.00805521	0.0212972	0.110855	0.00420301	0.467681	0.0665601	0.164093	0.186984	0	0	0.00137718	0	0	0	0	0	0	0	0	0	0	0	0	0.00201845	0	0	0.000188646	0.000559947
Psychrobacter	0.0541489	0.0632683	0.00716302	0.0610712	0.258106	0.057418	0.119884	0.188788	0.2172	0.396207	0.802106	0.33175	0.0859222	0.0622532	0.0241866	0.0504361	0.119884	0.0443734	0.163565	0.193634	0.598869	0.598869	0.80152	0.0867213	0.0241802	0.0420942	0.0424426	0.0510127	0.0469177	0.0716974	0.217073	0.25798	0.0867213	0.396091	0.0443635	0.0666088	0.331627	0.188078	0.219604	0.235537
Serratia	0.164613	0.165703	0.0196983	0.161756	0.222234	0.161141	0.136352	0.195879	0.203078	0.111376	0.151601	0.178097	0.204065	0.193313	0.0859967	0.212252	0.136352	0.0698228	0.154074	0.0539049	0.175176	0.175176	0.15149	0.155533	0.0859741	0.14733	0.196297	0.434553	0.218269	0.215092	0.20296	0.222125	0.155533	0.111344	0.0698073	0.242214	0.178031	0.195142	0.185114	0.0776547
Bradyrhizobium	0.0888042	0.248554	0.0214891	0.156804	0.125116	0.125949	0.119226	0.374917	0.135834	0.110768	0.100608	0.0873027	0.222861	0.252289	0.0497168	0.233267	0.119226	0.129205	0.150108	0.0857503	0.0754522	0.0754522	0.100534	0.114057	0.0497038	0.160484	0.116717	0.164374	0.150953	0.170281	0.135755	0.125055	0.114057	0.110735	0.129176	0.300749	0.0872702	0.373507	0.141906	0.0790674
Rhizobium	0.11263	0.225958	0.0232798	0.181563	0.0682451	0.150028	0.073775	0.438733	0.110281	0.0809455	0.101986	0.065186	0.335634	0.247375	0.0255303	0.218556	0.073775	0.072433	0.144773	0.111512	0.0517085	0.0517085	0.101912	0.0980327	0.0255236	0.119705	0.0901905	0.153038	0.155032	0.143395	0.110217	0.0682116	0.0980327	0.0809219	0.072417	0.331026	0.0651617	0.437082	0.125184	0.102172
Bifidobacterium	0.0454851	0.35852	0.00656611	0.168359	0.0332476	0.114836	0.028983	0.351872	0.0195009	0.0176498	0.0206728	0.0360851	0.443036	0.448879	0.0114214	0.384575	0.028983	0.013051	0.140651	0.169963	0.0944471	0.0944471	0.0206577	0.0122541	0.0114184	0.124967	0.0981484	0.185157	0.152993	0.259903	0.0194895	0.0332313	0.0122541	0.0176446	0.0130481	0.413782	0.0360717	0.350549	0.108359	0.122523
Parabacteroides	0.0433191	0.335924	0.00656611	0.148552	0.00262481	0.101871	0.0217373	0.368713	0.0221907	0.0955523	0.073044	0.0162965	0.418871	0.435773	0.0107496	0.268992	0.0217373	0.0176188	0.133896	0.156198	0.0279648	0.0279648	0.0729907	0.00188525	0.0107468	0.10392	0.0689692	0.14737	0.142793	0.394336	0.0221777	0.00262352	0.00188525	0.0955243	0.0176149	0.484428	0.0162904	0.367326	0.111489	0.148767
Mycoplasma	0.0563148	0.165703	0.0101476	0.209623	0.0376223	0.142619	0.0533551	0.335918	0.012104	0.0304307	0.0578839	0.0512176	0.464517	0.33584	0.0262021	0.285804	0.0533551	0.0482887	0.132053	0.137498	0.0564572	0.0564572	0.0578417	0.0179098	0.0261952	0.188108	0.0968221	0.253174	0.155032	0.555655	0.0120969	0.0376038	0.0179098	0.0304218	0.048278	0.655996	0.0511985	0.334655	0.147323	0.189703
Desulfovibrio	0.0541489	0.293745	0.0107445	0.163407	0.0524962	0.114836	0.0441332	0.334146	0.0531232	0.0286048	0.0358329	0.0372492	0.367854	0.357137	0.0181399	0.315225	0.0441332	0.0247969	0.130542	0.135098	0.0337688	0.0337688	0.0358068	0.0480738	0.0181352	0.122336	0.133959	0.173821	0.191751	0.28679	0.0530921	0.0524705	0.0480738	0.0285965	0.0247914	0.595442	0.0372353	0.332889	0.125045	0.150091
Fusobacterium	0.0779744	0.19583	0.014326	0.146901	0.0463716	0.116688	0.0500616	0.303124	0.0107591	0.0158239	0.0482366	0.0675141	0.459147	0.324372	0.0416546	0.338342	0.0500616	0.0371953	0.130244	0.135996	0.042211	0.042211	0.0482014	0.0179098	0.0416437	0.122336	0.0875378	0.154927	0.104035	0.555655	0.0107528	0.0463489	0.0179098	0.0158193	0.0371871	0.567184	0.0674889	0.301984	0.126741	0.172639
Paraburkholderia	0.0844723	0.0979152	0.0286521	0.11389	0.20911	0.100019	0.170605	0.132063	0.198371	0.124766	0.121281	0.145504	0.136938	0.117954	0.0759189	0.117684	0.170605	0.152044	0.127655	0.0439031	0.110276	0.110276	0.121192	0.215861	0.075899	0.0999737	0.0928431	0.126587	0.126474	0.0537731	0.198255	0.209007	0.215861	0.124729	0.15201	0.129181	0.14545	0.131566	0.135512	0.0471241
Mesotoga	0.0844723	0.156664	0.0113415	0.150202	0.0673701	0.120393	0.0606009	0.55041	0.0995219	0.0712077	0.101986	0.06635	0.20138	0.191674	0.022171	0.16812	0.0606009	0.0737381	0.125456	0.119227	0.00105528	0.00105528	0	0	0	0.00263089	0.00132633	0.00566808	0.0040798	0.0268865	0.000672052	0	0	0.00182531	0.000652405	0.0121107	0	0.00794695	0.00366164	0.00666536
Alicycliphilus	0.0888042	0.0105447	0.0250706	0.0429149	0.289604	0.0629746	0.305639	0.0230445	0.293186	0.134503	0.0923386	0.19905	0.0107403	0.0114677	0.0913714	0.0189135	0.305639	0.239486	0.124739	0.114813	0.161985	0.161985	0.0922712	0.350656	0.0913475	0.0697185	0.0875378	0.0585701	0.0550773	0.00896218	0.293015	0.289462	0.350656	0.134464	0.239433	0.0222029	0.198976	0.0229579	0.149404	0.113293
Devosia	0.0303234	0.0436852	0.00477535	0.0396138	0.027123	0.0351917	0.0250308	1.38356	0.112298	0.0687733	0.095095	0.0488895	0.0698118	0.0475091	0.0174681	0.0462331	0.0250308	0.0770009	0.122078	0.316033	0.0211055	0.0211055	0.0950256	0.0518442	0.0174635	0.0223625	0.0238739	0.026451	0.0265187	0.0448109	0.112233	0.0271098	0.0518442	0.0687532	0.0769838	0.0383505	0.0488713	1.37835	0.119615	0.31532
Ottowia	0.0693106	0.0241022	0.0214891	0.0478666	0.335976	0.057418	0.30037	0.0212719	0.308652	0.15337	0.095095	0.18741	0.0161104	0.0278501	0.0920433	0.021015	0.30037	0.0933146	0.120724	0.114913	0.177814	0.177814	0.0950256	0.408156	0.0920192	0.0947119	0.127328	0.0963573	0.0713965	0	0.308472	0.335811	0.408156	0.153326	0.0932939	0.0262398	0.18734	0.0211919	0.159692	0.126217
Arcobacter	0.0736425	0.0979152	0.00537227	0.54634	0.0218734	0.338952	0.0210786	0.201197	0.00941423	0.0852058	0.0496148	0.0221167	0.233601	0.222801	0.0154525	0.180729	0.0210786	0.0163137	0.12015	0.145135	0.0348241	0.0348241	0.0495786	0.0810655	0.0154485	1.26151	0.399225	0.721735	0.167272	0.295752	0.00940873	0.0218627	0.0810655	0.0851809	0.0163101	0.373413	0.0221084	0.20044	0.215057	0.321861
Microbacterium	0.424527	0.143107	0.00716302	0.158455	0.0454967	0.27042	0.0434745	0.328828	0.0564854	0.0352996	0.0427239	0.0291009	0.174529	0.157271	0.0174681	0.151308	0.0434745	0.0313224	0.120025	0.118853	0.0348241	0.0348241	0.0426927	0.0358197	0.0174635	0.186793	0.136612	0.162485	0.150953	0.0448109	0.0564524	0.0454744	0.0358197	0.0352893	0.0313154	0.177623	0.0290901	0.327591	0.0881074	0.083782
Rhodococcus	0.0519829	0.198843	0.0179076	0.122142	0.151364	0.0907575	0.0777272	0.347441	0.0988494	0.0462546	0.0661531	0.0372492	0.233601	0.253928	0.022171	0.197541	0.0777272	0.0626448	0.119682	0.0919584	0.0385175	0.0385175	0.0661048	0.0386475	0.0221652	0.114444	0.0729482	0.134144	0.150953	0.125471	0.0987917	0.15129	0.0386475	0.0462411	0.0626309	0.187716	0.0372353	0.346134	0.0983665	0.0792363
Citrobacter	0.121294	0.207881	0.014923	0.348271	0.0734947	0.248194	0.0526964	0.185243	0.055813	0.0450374	0.0744222	0.0570378	0.158419	0.196589	0.0288895	0.172323	0.0526964	0.0234918	0.117595	0.0927228	0.0527638	0.0527638	0.0743679	0.0801229	0.0288819	0.322284	0.248024	0.491233	0.373302	0.0896218	0.0557803	0.0734587	0.0801229	0.0450242	0.0234866	0.179642	0.0570165	0.184546	0.13958	0.134783
Paraprevotella	0.0671446	0.286214	0.00596919	0.234381	0.00262481	0.161141	0.0171263	0.284511	0	0.0152153	0.0248074	0.0197886	0.335634	0.394817	0.0026874	0.203846	0.0171263	0.0104408	0.115749	0.137023	0.0242713	0.0242713	0.0247893	0.00377049	0.00268669	0.165746	0.100801	0.204051	0.250908	0.28679	0	0.00262352	0.00377049	0.0152109	0.0104385	0.302767	0.0197812	0.283441	0.0958954	0.117203
Halomonas	0.0736425	0.156664	0.0155199	0.102336	0.123366	0.0889054	0.100123	0.151562	0.100194	0.072425	0.261856	0.0616939	0.142309	0.20478	0.0322487	0.184932	0.100123	0.0580769	0.11282	0.06239	0.0643718	0.0643718	0.261665	0.0763524	0.0322403	0.092081	0.0968221	0.11903	0.0856758	0.134433	0.100136	0.123306	0.0763524	0.0724038	0.0580641	0.173587	0.0616709	0.150992	0.10242	0.0534966
Rahnella	0.0519829	0.0150639	0.0531258	0.160106	0.123366	0.112984	0.0632357	0.0336805	0.0248805	0.0681647	0.562301	0.44699	0.037591	0.0344031	0.131682	0.037827	0.0632357	0.0052204	0.112547	0.150126	0.0506532	0.0506532	0.561891	0.274303	0.131648	0.0999737	0.0848851	0.103915	0.261107	0.0179244	0.0248659	0.123306	0.274303	0.0681448	0.00521924	0.0262398	0.446823	0.0335538	0.146634	0.157199
Christensenella	0.0259915	0.296758	0.00238767	0.0792275	0.00349975	0.0555658	0.00658705	0.298693	0.00201734	0.00426029	0.00964732	0.0162965	0.426926	0.425943	0.00403109	0.348849	0.00658705	0.00717805	0.112247	0.16206	0.00949748	0.00949748	0.00964028	0.00188525	0.00403004	0.0539332	0.0623375	0.0793531	0.061197	0.268865	0.00201616	0.00349803	0.00188525	0.00425905	0.00717646	0.369376	0.0162904	0.297569	0.0701282	0.11536
Barnesiella	0.0324893	0.293745	0.00417843	0.176611	0.00787443	0.112984	0.022396	0.321737	0.00605201	0.0194756	0.0165383	0.0197886	0.349059	0.365328	0.0100777	0.216455	0.022396	0.00587295	0.111281	0.136419	0.0205779	0.0205779	0.0165262	0.00377049	0.0100751	0.155222	0.0968221	0.20594	0.228469	0.349525	0.00604847	0.00787057	0.00377049	0.0194699	0.00587165	0.304786	0.0197812	0.320527	0.0997573	0.125769
Treponema	0.0281574	0.238009	0.00596919	0.176611	0.027998	0.111132	0.0204199	0.258808	0.00268978	0.0139981	0.0482366	0.0279369	0.40276	0.294884	0.0100777	0.25218	0.0204199	0.0117459	0.108446	0.127012	0.0142462	0.0142462	0.0482014	0.00754098	0.0100751	0.107866	0.0689692	0.185157	0.132594	0.439147	0.00268821	0.0279843	0.00754098	0.013994	0.0117433	0.553055	0.0279265	0.257834	0.107267	0.159261
Ralstonia	0.0758084	0.0994215	0.0173106	0.0940827	0.201235	0.085201	0.186414	0.0833149	0.154662	0.110159	0.0978514	0.114076	0.0939774	0.103209	0.057779	0.0714511	0.186414	0.101798	0.107454	0.0473287	0.106583	0.106583	0.09778	0.186639	0.0577639	0.0894501	0.0901905	0.113362	0.0571172	0.00896218	0.154572	0.201137	0.186639	0.110127	0.101775	0.0968855	0.114033	0.0830015	0.109033	0.0483494
Simplicispira	0.0389872	0.0120511	0.0196983	0.034662	0.336851	0.0370439	0.255578	0.0106359	0.307307	0.12294	0.0771786	0.197886	0.00268507	0.0147442	0.0739034	0.00840601	0.255578	0.100493	0.105924	0.113089	0.158291	0.158291	0.0771222	0.329918	0.073884	0.0513023	0.0623375	0.0680169	0.0550773	0.0179244	0.307128	0.336686	0.329918	0.122904	0.10047	0.0201845	0.197812	0.0105959	0.137659	0.115081
Herbaspirillum	0.0693106	0.0677874	0.0208922	0.077577	0.151364	0.0740878	0.141622	0.0912918	0.162059	0.0955523	0.122659	0.140848	0.102033	0.0868269	0.0739034	0.0756541	0.141622	0.157917	0.102945	0.0393278	0.104472	0.104472	0.122569	0.180041	0.073884	0.0776112	0.0702955	0.0887999	0.0713965	0.0716974	0.161965	0.15129	0.180041	0.0955243	0.157882	0.0706457	0.140796	0.0909484	0.111907	0.0399037
Tannerella	0.0584808	0.21692	0.00656611	0.221177	0.00349975	0.150028	0.0191024	0.247286	0.00605201	0.0334737	0.0358329	0.0151325	0.263137	0.283416	0.0100777	0.197541	0.0191024	0.00978825	0.0998118	0.107367	0.0163568	0.0163568	0.0358068	0.000942623	0.0100751	0.159169	0.100801	0.194604	0.238668	0.28679	0.00604847	0.00349803	0.000942623	0.0334639	0.00978608	0.264417	0.0151268	0.246355	0.0910671	0.107736
Ruthenibacterium	0.0194936	0.305797	0.00417843	0.0412643	0.00787443	0.0314873	0.00922187	0.295147	0	0.00121723	0.0124037	0.00698422	0.349059	0.357137	0.00470294	0.327834	0.00922187	0.0104408	0.0996369	0.146016	0.00791456	0.00791456	0.0123946	0.00188525	0.00470171	0.0499868	0.0331583	0.0642382	0.0448778	0.268865	0	0.00787057	0.00188525	0.00121687	0.0104385	0.387542	0.00698162	0.294037	0.066995	0.118424
Roseburia	0.0324893	0.295252	0.0161168	0.077577	0.00787443	0.057418	0.0158089	0.257035	0.000672445	0.00973781	0.0206728	0.0419053	0.281932	0.321096	0.0275458	0.300515	0.0158089	0.00978825	0.0994025	0.124288	0.0237437	0.0237437	0.0206577	0.00659836	0.0275386	0.0539332	0.0305056	0.0925786	0.0713965	0.41226	0.000672052	0.00787057	0.00659836	0.00973497	0.00978608	0.438003	0.0418897	0.256068	0.0851989	0.136905
Sphingomonas	0.1018	0.143107	0.0107445	0.161756	0.0533711	0.13521	0.0467681	0.318192	0.0880903	0.0815542	0.0840695	0.0442334	0.104718	0.150718	0.0255303	0.117684	0.0467681	0.0639499	0.0987925	0.0702529	0.0401005	0.0401005	0.0840082	0.0414754	0.0255236	0.127598	0.110085	0.164374	0.189711	0.0716974	0.0880388	0.053345	0.0414754	0.0815303	0.0639357	0.171568	0.0442169	0.316995	0.0975433	0.0739072
Campylobacter	0.0389872	0.140094	0.0119384	0.14525	0.0437468	0.0981663	0.0375462	0.262353	0.0255529	0.0176498	0.0330765	0.0419053	0.314153	0.265395	0.0282177	0.191237	0.0375462	0.0313224	0.0980077	0.0982125	0.0416834	0.0416834	0.0330524	0.0235656	0.0282103	0.102605	0.0649902	0.149259	0.106075	0.277828	0.025538	0.0437254	0.0235656	0.0176446	0.0313154	0.411764	0.0418897	0.261366	0.0958756	0.111133
Selenomonas	0.0563148	0.280188	0.00775994	0.112239	0.00699949	0.0870532	0.0131741	0.250831	0.00605201	0.0048689	0.00689094	0.0139684	0.287302	0.303075	0.00806219	0.268992	0.0131741	0.0078306	0.0963765	0.120102	0.0137186	0.0137186	0.00688591	0.00377049	0.00806007	0.0933965	0.0822325	0.132255	0.134633	0.259903	0.00604847	0.00699606	0.00377049	0.00486748	0.00782886	0.294693	0.0139632	0.249887	0.0742572	0.099873
Caulobacter	0.0606468	0.0617619	0.00596919	0.0858298	0.0428719	0.0740878	0.040181	0.391757	0.21989	0.259878	0.0744222	0.0419053	0.0671267	0.0688062	0.0382954	0.0462331	0.040181	0.110933	0.0961542	0.0972675	0.0522361	0.0522361	0.0743679	0.0433606	0.0382854	0.0710339	0.0543795	0.0529021	0.0591571	0.0448109	0.219761	0.0428509	0.0433606	0.259802	0.110909	0.0686273	0.0418897	0.390284	0.0955696	0.0960495
Pandoraea	0.0519829	0.0647746	0.0185045	0.0759264	0.156614	0.0648268	0.14755	0.0842012	0.18156	0.0864231	0.107499	0.109419	0.0886073	0.0737209	0.0624819	0.0798571	0.14755	0.103755	0.0947363	0.0413819	0.0870602	0.0870602	0.10742	0.1725	0.0624656	0.0644567	0.0716218	0.0623489	0.0897556	0.0358487	0.181454	0.156537	0.1725	0.0863978	0.103732	0.0968855	0.109379	0.0838845	0.101739	0.0422534
Pseudoalteromonas	0.158115	0.149132	0.0095507	0.0742758	0.0393721	0.109279	0.0408397	0.149789	0.042364	0.0249531	0.219132	0.0384132	0.20138	0.190036	0.0167962	0.163917	0.0408397	0.0169663	0.0936196	0.0729096	0.0411557	0.0411557	0.218972	0.0311065	0.0167918	0.0565641	0.111412	0.100136	0.0652768	0.107546	0.0423393	0.0393529	0.0311065	0.0249458	0.0169625	0.213956	0.0383989	0.149226	0.0748002	0.0632827
Mucilaginibacter	0.0563148	0.182273	0.0095507	0.0792275	0.0288729	0.0685312	0.0559899	0.21715	0.0585027	0.0614699	0.0854477	0.0384132	0.268507	0.17693	0.0248584	0.16812	0.0559899	0.0378479	0.0929999	0.0750407	0.0311306	0.0311306	0.0853853	0.0584426	0.0248519	0.0513023	0.0583585	0.0793531	0.0693566	0.197168	0.0584685	0.0288588	0.0584426	0.061452	0.0378395	0.280564	0.0383989	0.216334	0.081491	0.0726046
Arthrobacter	0.0346553	0.134068	0.0113415	0.0907815	0.100618	0.066679	0.0777272	0.194106	0.105574	0.0310393	0.0689094	0.0384132	0.214805	0.193313	0.0228429	0.178628	0.0777272	0.0221867	0.0924119	0.0654947	0.0385175	0.0385175	0.0688591	0.0329918	0.0228369	0.0762957	0.0742745	0.0831318	0.0673167	0.098584	0.105512	0.100568	0.0329918	0.0310302	0.0221818	0.161476	0.0383989	0.193376	0.0714923	0.0476201
Yersinia	0.0368212	0.0753194	0.0984916	0.077577	0.0866187	0.0592702	0.0652118	0.414802	0.0578303	0.037734	0.122659	0.0826466	0.123513	0.0950181	0.0335924	0.0945676	0.0652118	0.0176188	0.0913613	0.0858846	0.090226	0.090226	0.122569	0.102746	0.0335836	0.0513023	0.0570322	0.0661276	0.0571172	0.125471	0.0577965	0.0865763	0.102746	0.037723	0.0176149	0.125144	0.0826158	0.413241	0.0955477	0.0855103
Azospirillum	0.047651	0.119005	0.0137291	0.150202	0.0708699	0.105575	0.0645531	0.194106	0.086073	0.0608613	0.0661531	0.0453974	0.139624	0.147442	0.0349361	0.142902	0.0645531	0.0665601	0.0900107	0.0487386	0.0432663	0.0432663	0.0661048	0.0546721	0.034927	0.0815575	0.0901905	0.107693	0.130554	0.134433	0.0860227	0.0708352	0.0546721	0.0608435	0.0665453	0.185697	0.0453805	0.193376	0.0861131	0.0471657
Alcaligenes	0.0649787	0.0482044	0.0202952	0.0363126	0.202985	0.0481571	0.206833	0.0487481	0.188957	0.102247	0.0620185	0.140848	0.0214805	0.0458708	0.0685286	0.0483346	0.206833	0.046331	0.0893314	0.0675981	0.111859	0.111859	0.0619732	0.23	0.0685106	0.0591949	0.140591	0.0623489	0.0571172	0.0448109	0.188847	0.202886	0.23	0.102217	0.0463208	0.0544981	0.140796	0.0485647	0.109022	0.0652663
Geobacter	0.0238255	0.236503	0.00358151	0.125444	0.0148739	0.0814966	0.0270069	0.225127	0.0147938	0.0152153	0.0234292	0.0209526	0.233601	0.273587	0.0114214	0.212252	0.0270069	0.0208816	0.0883888	0.0991441	0.0158291	0.0158291	0.0234121	0.0216803	0.0114184	0.0841884	0.0822325	0.145481	0.118314	0.224054	0.0147851	0.0148666	0.0216803	0.0152109	0.020877	0.278546	0.0209448	0.224281	0.0752017	0.0871012
Olsenella	0.0346553	0.228971	0.00298459	0.135347	0.00612456	0.0907575	0.00526964	0.234877	0.00134489	0.0048689	0.00689094	0.0151325	0.260452	0.317819	0.00403109	0.218556	0.00526964	0.0039153	0.0876259	0.112247	0.011608	0.011608	0.00688591	0.00188525	0.00403004	0.0855038	0.0676428	0.109583	0.136673	0.161319	0.0013441	0.00612156	0.00188525	0.00486748	0.00391443	0.270472	0.0151268	0.233994	0.0630258	0.0859731
Sphingobium	0.0649787	0.111473	0.00775994	0.123793	0.0393721	0.0981663	0.0573073	0.212719	0.0658996	0.0699905	0.0923386	0.0477255	0.134253	0.140889	0.0235147	0.117684	0.0573073	0.0515514	0.0842624	0.0498316	0.0290201	0.0290201	0.0922712	0.099918	0.0235086	0.0841884	0.0782535	0.109583	0.118314	0.0716974	0.0658611	0.0393529	0.099918	0.0699701	0.05154	0.173587	0.0477077	0.211919	0.0830905	0.0494442
Paludibacter	0.0108298	0.119005	0.0131322	0.0363126	0.0376223	0.0259307	0.163359	0.122313	0.0268978	0.115028	0.111633	0.0232807	0.187955	0.155633	0.0530761	0.117684	0.163359	0.0293647	0.0840231	0.0609482	0.0168844	0.0168844	0.111552	0.042418	0.0530622	0.0342015	0.0225476	0.073685	0.0652768	0.179244	0.0268821	0.0376038	0.042418	0.114994	0.0293582	0.230103	0.0232721	0.121853	0.0690133	0.0602707
Polaribacter	0.1018	0.122017	0.0101476	0.0594206	0.0227484	0.0777922	0.0362288	0.168402	0.0329498	0.0395599	0.121281	0.0267728	0.249711	0.165463	0.0275458	0.161816	0.0362288	0.0352377	0.0830623	0.0678429	0.0290201	0.0290201	0.121192	0.0254508	0.0275386	0.0894501	0.0756008	0.0812424	0.0530374	0.152357	0.0329306	0.0227372	0.0254508	0.0395483	0.0352299	0.31286	0.0267629	0.167769	0.0748443	0.0747894
Deinococcus	0.0541489	0.143107	0.0113415	0.112239	0.0358724	0.0870532	0.0303004	0.184356	0.0356396	0.0279962	0.0303202	0.0279369	0.220176	0.20478	0.0228429	0.189135	0.0303004	0.0254494	0.0818331	0.0733222	0.0258542	0.0258542	0.030298	0.0226229	0.0228369	0.101289	0.0888641	0.107693	0.0917955	0.179244	0.0356188	0.0358548	0.0226229	0.027988	0.0254438	0.179642	0.0279265	0.183663	0.0686173	0.0594717
Micromonospora	0.0628127	0.129549	0.0137291	0.153503	0.0306228	0.112984	0.0474268	0.172834	0.0517783	0.0389512	0.0592621	0.033757	0.166474	0.163824	0.0147807	0.121887	0.0474268	0.0456785	0.0815157	0.056104	0.0242713	0.0242713	0.0592189	0.0386475	0.0147768	0.117074	0.0915168	0.145481	0.134633	0.0896218	0.051748	0.0306078	0.0386475	0.0389399	0.0456684	0.145328	0.0337445	0.172184	0.0720212	0.0503232
Mycobacterium	0.0714765	0.140094	0.0095507	0.146901	0.0323727	0.112984	0.0395223	0.180811	0.0390018	0.0334737	0.0372111	0.0162965	0.177215	0.165463	0.0194836	0.145004	0.0395223	0.039153	0.0803075	0.0622908	0.0242713	0.0242713	0.0371839	0.0480738	0.0194785	0.0986582	0.0835588	0.149259	0.126474	0.143395	0.038979	0.0323568	0.0480738	0.0334639	0.0391443	0.19579	0.0162904	0.180131	0.0743807	0.0593066
Agrobacterium	0.0714765	0.144613	0.0095507	0.0577701	0.041997	0.0629746	0.0434745	0.301352	0.0632098	0.0395599	0.050993	0.0477255	0.118143	0.167101	0.0141088	0.113481	0.0434745	0.0456785	0.0798157	0.0696991	0.0263819	0.0263819	0.0509558	0.0509016	0.0141051	0.0841884	0.0583585	0.100136	0.0795561	0.0806596	0.0631729	0.0419764	0.0509016	0.0395483	0.0456684	0.19579	0.0477077	0.300218	0.0753671	0.0688667
Marinobacterium	0.0324893	0.119005	0.00716302	0.0577701	0.0577458	0.0463049	0.062577	0.144472	0.0537956	0.0413857	0.216376	0.032593	0.153049	0.145804	0.0188118	0.151308	0.062577	0.0215341	0.0791533	0.0598509	0.00738693	0.00738693	0.0192806	0.00377049	0.000671673	0.0092081	0.00265266	0.00755744	0.0020399	0.0179244	0.00739257	0.00349803	0.00377049	0.00304218	0.00260962	0.0161476	0.00814522	0.0132449	0.00754054	0.00566795
Curvibacter	0.047651	0.019583	0.00596919	0.0412643	0.219609	0.0444527	0.219349	0.0150676	0.162732	0.0955523	0.0620185	0.123388	0.0134253	0.0114677	0.0544198	0.021015	0.219349	0.0287122	0.0780569	0.0769268	0.118718	0.118718	0.0619732	0.253565	0.0544055	0.0460405	0.0809061	0.0510127	0.0448778	0.00896218	0.162637	0.219502	0.253565	0.0955243	0.0287058	0.0121107	0.123342	0.0150109	0.0971988	0.0793543
Duncaniella	0.0411532	0.189805	0.00238767	0.158455	0.00437468	0.107427	0.0131741	0.208287	0.00201734	0.00730336	0.00551276	0.0128044	0.204065	0.258842	0.00201555	0.140801	0.0131741	0.00195765	0.0763087	0.0914059	0.0184673	0.0184673	0.00550873	0	0.00201502	0.114444	0.0636639	0.137923	0.159112	0.152357	0.00201616	0.00437254	0	0.00730122	0.00195722	0.179642	0.0127996	0.207504	0.0604195	0.0748658
Neisseria	0.0411532	0.111473	0.00656611	0.0990344	0.0848688	0.0740878	0.0586248	0.13029	0.0658996	0.0286048	0.0482366	0.0477255	0.169159	0.134336	0.0241866	0.172323	0.0586248	0.013051	0.0760136	0.050517	0.0527638	0.0527638	0.0482014	0.0904918	0.0241802	0.0697185	0.0543795	0.0717956	0.0489576	0.125471	0.0658611	0.0848273	0.0904918	0.0285965	0.0130481	0.167531	0.0477077	0.1298	0.0703659	0.0395217
Raoultella	0.0866382	0.0286214	0.00179076	0.635471	0.0201235	0.394518	0.00329353	0.0230445	0.0134489	0.0352996	0.0316983	0.0128044	0.0295358	0.0245736	0.00470294	0.0147105	0.00329353	0.0039153	0.0759713	0.166131	0.0121357	0.0121357	0.0316752	0.00282787	0.00470171	0.310445	0.255982	0.426995	0.658888	0.00896218	0.013441	0.0201137	0.00282787	0.0352893	0.00391443	0.0121107	0.0127996	0.0229579	0.102678	0.186719
Legionella	0.0888042	0.0361533	0.00119384	0.577701	0.0166238	0.36303	0.0191024	0.0398848	0.0134489	0.00973781	0.0137819	0.0162965	0.0537014	0.0360413	0.00470294	0.0357255	0.0191024	0.00978825	0.0752678	0.149834	0.024799	0.024799	0.0468242	0.0197951	0.0107468	0.0394633	0.0384636	0.0585701	0.0734364	0.125471	0.0120969	0.0139921	0.0197951	0.00973497	0.0117433	0.161476	0.0162904	0.111257	0.0454863	0.0447052
Verminephrobacter	0.0368212	0.0135575	0.0125353	0.0264092	0.182862	0.0314873	0.172581	0.0132949	0.202406	0.0736422	0.0537494	0.1327	0.0107403	0.00655297	0.0517324	0.016812	0.172581	0.098535	0.0727222	0.069066	0.0981406	0.0981406	0.0537101	0.198893	0.0517188	0.0381479	0.0795798	0.0491233	0.0489576	0	0.202288	0.182772	0.198893	0.0736207	0.0985132	0.0100922	0.132651	0.0132449	0.0904715	0.0670955
Elizabethkingia	0.0758084	0.115992	0.00477535	0.0544689	0.00787443	0.0629746	0.033594	0.152448	0.0275703	0.0213015	0.044102	0.0244448	0.21212	0.15891	0.013437	0.149207	0.033594	0.107671	0.0722385	0.0622258	0.0121357	0.0121357	0.0440699	0.0235656	0.0134335	0.0552486	0.0504006	0.0793531	0.0469177	0.125471	0.0275541	0.00787057	0.0235656	0.0212952	0.107647	0.165513	0.0244357	0.151875	0.0551381	0.050034
Planococcus	0.0389872	0.114485	0.00596919	0.0396138	0.0236233	0.0388961	0.0105393	0.180811	0.012104	0.0103464	0.0248074	0.0116404	0.163789	0.224439	0.0107496	0.308921	0.0105393	0.00848315	0.0688192	0.0906811	0.0142462	0.0142462	0.0247893	0.00565574	0.0107468	0.0552486	0.0437689	0.0793531	0.0428379	0.304714	0.0120969	0.0236117	0.00565574	0.0103434	0.00848127	0.201845	0.011636	0.180131	0.0583004	0.0840785
Anaerostipes	0.0216596	0.209388	0.0137291	0.0363126	0.0183737	0.0296351	0.00790446	0.182584	0.00201734	0.0091292	0.0179165	0.0209526	0.225546	0.190036	0.0181399	0.208049	0.00790446	0.0156612	0.0686077	0.0865895	0.0200502	0.0200502	0.0179034	0.00188525	0.0181352	0.0197316	0.0212213	0.0434553	0.0387581	0.250941	0.00201616	0.0183647	0.00188525	0.00912653	0.0156577	0.236158	0.0209448	0.181897	0.0521212	0.0803407
Paracoccus	0.0909701	0.0843577	0.00775994	0.0709747	0.0402471	0.0796444	0.0533551	0.219809	0.0699343	0.0450374	0.0565057	0.0349211	0.0912923	0.0933799	0.022171	0.0735526	0.0533551	0.0437208	0.0683883	0.0450331	0.0295477	0.0295477	0.0564645	0.0669262	0.0221652	0.0670876	0.0809061	0.0623489	0.081596	0.0627353	0.0698934	0.0402274	0.0669262	0.0450242	0.0437111	0.0968855	0.0349081	0.218983	0.0653269	0.0434502
Synechococcus	0.0303234	0.159677	0.0101476	0.0643724	0.0358724	0.0500093	0.022396	0.169289	0.0390018	0.0115636	0.0344547	0.0232807	0.1799	0.172016	0.00806219	0.174425	0.022396	0.0104408	0.0676459	0.0675976	0.0327135	0.0327135	0.0344296	0.0273361	0.00806007	0.0618258	0.0411162	0.0850212	0.0734364	0.161319	0.038979	0.0358548	0.0273361	0.0115603	0.0104385	0.226066	0.0232721	0.168652	0.0611184	0.061808
Leisingera	0.00649787	0.185286	0.00238767	0.0247586	0.000874937	0.0166698	0.00329353	0.204742	0.00605201	0.00243445	0.00413457	0.00116404	0.244341	0.288331	0	0.172323	0.00329353	0.00326275	0.0649915	0.101107	0.00580401	0.00580401	0.00688591	0.0160246	0.00268669	0.0105235	0.0106106	0.0113362	0.0040798	0.0268865	0.00672052	0.00961959	0.0160246	0.00730122	0.00391443	0.0161476	0.00232721	0.0220749	0.0102651	0.00681711
Pontibacter	0.0563148	0.126537	0.00358151	0.0907815	0.0096243	0.07594	0.00988058	0.170175	0.0195009	0.0182584	0.0413457	0.0116404	0.171844	0.183483	0.00873404	0.12609	0.00988058	0.0150086	0.0638123	0.064676	0.0163568	0.0163568	0.0413155	0.0179098	0.00873175	0.0762957	0.0517269	0.0906892	0.112195	0.161319	0.0194895	0.00961959	0.0179098	0.0182531	0.0150053	0.199826	0.011636	0.169535	0.058565	0.0624941
Methylobacterium	0.0628127	0.0964088	0.00835686	0.103986	0.0236233	0.085201	0.0395223	0.175493	0.0437089	0.0371254	0.0496148	0.0256088	0.0751819	0.0950181	0.0214992	0.105075	0.0395223	0.0515514	0.063295	0.0413002	0.0290201	0.0290201	0.0495786	0.0461885	0.0214935	0.0828729	0.0636639	0.154927	0.108115	0.0627353	0.0436834	0.0236117	0.0461885	0.0371146	0.05154	0.133218	0.0255993	0.174833	0.0657446	0.0467063
Actinomyces	0.0324893	0.159677	0.00417843	0.0973838	0.0183737	0.0685312	0.0217373	0.167516	0.0195009	0.0194756	0.0192946	0.0139684	0.147679	0.14908	0.0127651	0.130293	0.0217373	0.0110933	0.0619319	0.0612023	0.017412	0.017412	0.0192806	0.015082	0.0127618	0.0999737	0.0649902	0.0963573	0.104035	0.107546	0.0194895	0.0183647	0.015082	0.0194699	0.0110909	0.16955	0.0139632	0.166886	0.0549304	0.0548734
Polynucleobacter	0.0238255	0.0497108	0.00417843	0.0297103	0.0778694	0.0277829	0.09156	0.0717926	0.0880903	0.0322565	0.0537494	0.0570378	0.0724968	0.229354	0.0201555	0.0672481	0.09156	0.0137035	0.0612268	0.0503729	0.0517085	0.0517085	0.0537101	0.101803	0.0201502	0.0302552	0.0424426	0.0434553	0.0489576	0.0627353	0.0880388	0.0778312	0.101803	0.0322471	0.0137005	0.0928486	0.0570165	0.0715225	0.0578853	0.0265844
Dickeya	0.0324893	0.103941	0.0095507	0.0594206	0.0629954	0.0481571	0.0487442	0.0930645	0.0571578	0.0346909	0.0785568	0.0582018	0.118143	0.0901034	0.0208273	0.0903646	0.0487442	0.0398055	0.060831	0.0295694	0.0432663	0.0432663	0.0784994	0.0575	0.0208219	0.0394633	0.0729482	0.0510127	0.0469177	0.098584	0.0571244	0.0629646	0.0575	0.0346808	0.0397967	0.131199	0.0581801	0.0927144	0.0603578	0.0265536
Ramlibacter	0.0346553	0.0165703	0.0185045	0.0313609	0.133865	0.0333395	0.102758	0.0257035	0.142558	0.0632958	0.0675313	0.0884667	0.0187955	0.0212972	0.049045	0.012609	0.102758	0.120069	0.0601768	0.0440143	0.0807286	0.0807286	0.067482	0.126311	0.0490321	0.0328861	0.0490742	0.0340085	0.0367182	0.0179244	0.142475	0.1338	0.126311	0.0632773	0.120043	0.018166	0.0884338	0.0256068	0.0718337	0.0425356
Macrococcus	0.132123	0.0768257	0.0101476	0.089131	0.027998	0.107427	0.0382049	0.0859739	0.0658996	0.0614699	0.0413457	0.0372492	0.0751819	0.0786357	0.0228429	0.0462331	0.0382049	0.0450259	0.0599956	0.031615	0.00263819	0.00263819	0.00137718	0.00188525	0.00671673	0.011839	0.011937	0.00755744	0.0040798	0.116508	0.0013441	0.00524705	0.00188525	0.00425905	0.00456684	0.0524797	0.00465441	0.0520967	0.0163172	0.0294701
Azoarcus	0.047651	0.0451916	0.0131322	0.0577701	0.0594957	0.0537137	0.0744337	0.0974961	0.0537956	0.0438201	0.118524	0.0477255	0.0886073	0.0507855	0.026874	0.0651466	0.0744337	0.0548142	0.0596339	0.0246903	0.0242713	0.0242713	0.118438	0.0791803	0.0268669	0.0565641	0.0517269	0.0661276	0.081596	0.0716974	0.0537642	0.0594666	0.0791803	0.0438073	0.054802	0.0888117	0.0477077	0.0971294	0.0625227	0.0255484
Tenacibaculum	0.0823063	0.0813449	0.00179076	0.0495172	0.013999	0.0629746	0.0349114	0.117882	0.0221907	0.0316479	0.0551276	0.0232807	0.166474	0.119592	0.0161244	0.123989	0.0349114	0.0287122	0.0592653	0.0464427	0.0205779	0.0205779	0.0550873	0.0197951	0.0161201	0.0776112	0.0543795	0.0491233	0.0509975	0.188206	0.0221777	0.0139921	0.0197951	0.0316386	0.0287058	0.189734	0.0232721	0.117438	0.0555127	0.0551554
Nocardia	0.0411532	0.093396	0.0101476	0.110588	0.0183737	0.0796444	0.0217373	0.102814	0.0403467	0.0322565	0.044102	0.0419053	0.131568	0.106486	0.0154525	0.115583	0.0217373	0.03328	0.0589207	0.0407147	0.0211055	0.0211055	0.0440699	0.0160246	0.0154485	0.0684031	0.0795798	0.102025	0.118314	0.0627353	0.0403231	0.0183647	0.0160246	0.0322471	0.0332727	0.121107	0.0418897	0.102427	0.053026	0.0370627
Hydrogenobacter	0.00866382	0.17926	0.00417843	0.0429149	0.00874937	0.0277829	0.00526964	0.170175	0	0.00365168	0.00413457	0.0151325	0.20675	0.173654	0.00403109	0.180729	0.00526964	0.0156612	0.0586671	0.079729	0	0	0	0	0.000671673	0.00131544	0	0.00377872	0	0	0	0.000874508	0	0	0	0.00605535	0	0.00794695	0.00114681	0.00234361
Collimonas	0.0346553	0.0376597	0.0101476	0.0396138	0.104117	0.0370439	0.0928774	0.0531797	0.112971	0.0693819	0.0758004	0.0756623	0.0349059	0.054062	0.0214992	0.0462331	0.0928774	0.0619922	0.0585933	0.0291225	0.06701	0.06701	0.0757451	0.0895491	0.0214935	0.0315706	0.0424426	0.047234	0.0367182	0.0358487	0.112905	0.104066	0.0895491	0.0693616	0.0619785	0.0524797	0.0756342	0.0529797	0.0629764	0.025441
Clostridioides	0.0216596	0.0949024	0.00835686	0.0445655	0.0227484	0.0351917	0.00724576	0.155994	0.00336223	0.00547752	0.0179165	0.0232807	0.233601	0.183483	0.013437	0.142902	0.00724576	0.0123984	0.0574316	0.0720501	0.0232161	0.0232161	0.0179034	0.00754098	0.0134335	0.0315706	0.0225476	0.0566808	0.0305985	0.241979	0.00336026	0.0227372	0.00754098	0.00547592	0.0123957	0.191753	0.0232721	0.155407	0.0494793	0.0702963
Mordavella	0.0216596	0.170222	0.00358151	0.0297103	0.00174987	0.0259307	0.00395223	0.169289	0	0.00304307	0.00413457	0.0104763	0.169159	0.193313	0.00201555	0.199643	0.00395223	0.00326275	0.0563941	0.0798723	0.00633165	0.00633165	0.00413155	0	0.00201502	0.0210471	0.0265266	0.0566808	0.0591571	0.197168	0	0.00174902	0	0.00304218	0.00326203	0.197808	0.0104724	0.168652	0.0424653	0.0694856
Serpentinomonas	0.0346553	0.00602555	0.0095507	0.0313609	0.145239	0.0333395	0.12713	0.0141813	0.135834	0.0772939	0.0385893	0.105927	0.00805521	0.00982946	0.0510605	0.00630451	0.12713	0.0489412	0.056136	0.0500936	0.0796733	0.0796733	0.0385611	0.124426	0.0510471	0.0434096	0.0716218	0.0680169	0.0224389	0	0.135755	0.145168	0.124426	0.0772713	0.0489304	0.0262398	0.105888	0.0141279	0.0698153	0.0434738
Spiroplasma	0.0216596	0.0647746	0.00835686	0.103986	0.0157489	0.0685312	0.0158089	0.163084	0.00672445	0.00791197	0.0234292	0.0151325	0.169159	0.157271	0.0127651	0.119786	0.0158089	0.0189239	0.0560479	0.0594824	0.0211055	0.0211055	0.0234121	0.00565574	0.0127618	0.115759	0.0397899	0.094468	0.081596	0.152357	0.00672052	0.0157411	0.00565574	0.00790966	0.0189197	0.28662	0.0151268	0.162471	0.0603986	0.0764161
Akkermansia	0.00433191	0.111473	0.00298459	0.0297103	0.00174987	0.0185219	0.00197612	0.194992	0.00403467	0.00182584	0.00551276	0.00349211	0.279247	0.257204	0.00403109	0.0798571	0.00197612	0.00456785	0.0559716	0.0926509	0.00211055	0.00211055	0.00550873	0.00377049	0.00403004	0.0263089	0.0185686	0.0226723	0.0244788	0.107546	0.00403231	0.00174902	0.00377049	0.00182531	0.00456684	0.135236	0.00349081	0.194259	0.0314464	0.05535
Hungatella	0.00433191	0.137081	0.00358151	0.0313609	0.0096243	0.0203741	0.00790446	0.177266	0.00268978	0.0048689	0.0137819	0.0174605	0.20675	0.175292	0.0127651	0.163917	0.00790446	0.0078306	0.0558214	0.0754849	0.00527638	0.00527638	0.00413155	0.000942623	0.00403004	0.0289398	0.0238739	0.0434553	0.0530374	0.152357	0	0.00874508	0.000942623	0.00365061	0.0156577	0.224048	0.0151268	0.169535	0.0421681	0.0672611
Mycolicibacterium	0.0346553	0.0964088	0.00238767	0.0990344	0.0201235	0.0703834	0.022396	0.13029	0.0309325	0.0286048	0.0413457	0.0197886	0.102033	0.108124	0.0147807	0.12609	0.022396	0.0306698	0.0555802	0.0427559	0.0126633	0.0126633	0.0413155	0.0160246	0.0147768	0.0749803	0.0596849	0.105804	0.0775162	0.0627353	0.0309144	0.0201137	0.0160246	0.0285965	0.030663	0.0968855	0.0197812	0.1298	0.0472746	0.0364606
Mucinivorans	0.00866382	0.189805	0.00179076	0.0247586	0.00174987	0.0185219	0.00790446	0.175493	0.000672445	0.00426029	0.0179165	0.0104763	0.19601	0.185121	0.00671849	0.134496	0.00790446	0.0039153	0.0553433	0.0782692	0.011608	0.011608	0.0179034	0.00188525	0.00671673	0.0249934	0.0132633	0.0396765	0.0346783	0.197168	0.000672052	0.00174902	0.00188525	0.00425905	0.00391443	0.217992	0.0104724	0.174833	0.043071	0.0719218
Sphingopyxis	0.0563148	0.0723066	0.00417843	0.0528184	0.027998	0.0537137	0.033594	0.16663	0.0450538	0.0760766	0.0606403	0.0221167	0.0886073	0.0819122	0.0181399	0.0651466	0.033594	0.03328	0.0551178	0.0363321	0.0232161	0.0232161	0.060596	0.0367623	0.0181352	0.0513023	0.0450952	0.0642382	0.0673167	0.0358487	0.0450275	0.0279843	0.0367623	0.0760544	0.0332727	0.0888117	0.0221084	0.166003	0.0512084	0.0349994
Brevibacillus	0.0108298	0.1416	0.00358151	0.0412643	0.0148739	0.0277829	0.0138328	0.129404	0.00941423	0.00730336	0.0137819	0.0174605	0.177215	0.181845	0.00940588	0.151308	0.0138328	0.0189239	0.0546478	0.0662881	0.0153015	0.0153015	0.0137718	0.015082	0.00940342	0.035517	0.0212213	0.0453446	0.0387581	0.250941	0.00940873	0.0148666	0.015082	0.00730122	0.0189197	0.203863	0.017454	0.128917	0.0486919	0.0711138
Luteipulveratus	0.255583	0.0316341	0.00238767	0.0363126	0.0454967	0.129654	0.0283243	0.0771106	0.103557	0.0480804	0.0482366	0.0372492	0.0241656	0.0245736	0.0141088	0.029421	0.0283243	0.0189239	0.054619	0.0592802	0	0	0.00137718	0	0	0.00526177	0.00265266	0.00755744	0.0061197	0.00896218	0	0.00174902	0	0.00121687	0.00130481	0.00605535	0.0011636	0.0114789	0.00304997	0.00359815
Lacunisphaera	0.0151617	0.093396	0.00716302	0.0445655	0.06912	0.0314873	0.00988058	0.1037	0.000672445	0.00791197	0.214997	0.0209526	0.126198	0.116315	0.00806219	0.0819586	0.00988058	0.0065255	0.053775	0.0587431	0.000527638	0.000527638	0.00275437	0.000942623	0.000671673	0.0210471	0.0132633	0.020783	0.0183591	0.00896218	0.000672052	0	0.000942623	0.000608435	0.00260962	0.0121107	0.0011636	0.0158939	0.00676886	0.00790432
Salmonella	0.0454851	0.140094	0.00716302	0.077577	0.0236233	0.0629746	0.0184437	0.0797696	0.0188285	0.0158239	0.0454802	0.0174605	0.102033	0.122868	0.00537479	0.151308	0.0184437	0.0137035	0.0536919	0.04792	0.0153015	0.0153015	0.045447	0.0320492	0.00537338	0.0618258	0.0663165	0.111472	0.122394	0.0896218	0.0188175	0.0236117	0.0320492	0.0158193	0.0137005	0.102941	0.017454	0.0794695	0.0482759	0.0382653
Sporosarcina	0.0129957	0.128043	0.00298459	0.0280598	0.0174987	0.0222263	0.00461094	0.136495	0.00201734	0.0103464	0.0110255	0.00931229	0.155734	0.178569	0.00403109	0.224861	0.00461094	0.00587295	0.0532941	0.0738764	0.0126633	0.0126633	0.0110175	0.00188525	0.00403004	0.023678	0.0318319	0.0283404	0.0183591	0.250941	0.00201616	0.0174902	0.00188525	0.0103434	0.00587165	0.179642	0.00930882	0.135981	0.0421082	0.070933
Ethanoligenens	0.00649787	0.152145	0.00298459	0.0264092	0.00874937	0.0185219	0.00922187	0.17372	0.00201734	0.00426029	0.00551276	0.00931229	0.220176	0.167101	0.00403109	0.12609	0.00922187	0.0065255	0.0529166	0.0754434	0.00633165	0.00633165	0.00550873	0.00471311	0.00403004	0.0249934	0.019895	0.0283404	0.0387581	0.152357	0.00201616	0.00874508	0.00471311	0.00425905	0.00652405	0.215974	0.00930882	0.173067	0.0397703	0.0664496
Meiothermus	0.0173276	0.135575	0.000596919	0.0528184	0.00524962	0.0370439	0.00592835	0.119654	0.00201734	0.00547752	0.00964732	0.00582018	0.177215	0.167101	0.00604664	0.187034	0.00592835	0.00456785	0.0525027	0.0695229	0.00369346	0.00369346	0.00275437	0.00188525	0.00134335	0.00657722	0.00265266	0.0094468	0.0061197	0.0179244	0.00403231	0.00262352	0.00188525	0.00243374	0.00195722	0.0282583	0.00232721	0.0247238	0.00690733	0.00815787
Leifsonia	0.0389872	0.0918896	0.00716302	0.0577701	0.013999	0.0500093	0.0184437	0.111677	0.012104	0.00973781	0.0468584	0.0162965	0.174529	0.140889	0.0107496	0.105075	0.0184437	0.0117459	0.0520205	0.0513341	0	0	0.00413155	0.00282787	0	0.0223625	0.00928431	0.0396765	0.0367182	0.215092	0.00604847	0.000874508	0.00282787	0.00243374	0.00326203	0.0544981	0.0011636	0.203972	0.0336207	0.0660169
Petrimonas	0.0324893	0.119005	0.00238767	0.105637	0.00262481	0.0740878	0.0131741	0.124972	0.00134489	0.0200842	0.028942	0.00582018	0.153049	0.129421	0.00604664	0.0903646	0.0131741	0.0091357	0.0517644	0.0538778	0.00685929	0.00685929	0.0289208	0.00282787	0.00604506	0.0565641	0.0318319	0.0755744	0.0836359	0.0627353	0.0013441	0.00262352	0.00282787	0.0200784	0.00913367	0.149365	0.00581801	0.124502	0.0376415	0.0451624
Nonlabens	0.0346553	0.115992	0.00179076	0.023108	0.013124	0.0277829	0.0197612	0.108132	0.0248805	0.0103464	0.0592621	0.0174605	0.131568	0.178569	0.0107496	0.115583	0.0197612	0.0176188	0.0516747	0.0531757	0.00580401	0.00580401	0.0592189	0.0141393	0.0107468	0.0420942	0.015916	0.0434553	0.0367182	0.143395	0.0248659	0.0131176	0.0141393	0.0103434	0.0176149	0.141291	0.017454	0.107725	0.0402135	0.044646
Gramella	0.0324893	0.0903832	0.00179076	0.0330115	0.0174987	0.0333395	0.0191024	0.122313	0.0208458	0.0206928	0.0551276	0.0128044	0.150364	0.132698	0.0154525	0.128192	0.0191024	0.0247969	0.0516669	0.0490772	0.0100251	0.0100251	0.0550873	0.0169672	0.0154485	0.0315706	0.0225476	0.0510127	0.0550773	0.152357	0.0208336	0.0174902	0.0169672	0.0206868	0.0247914	0.199826	0.0127996	0.121853	0.0475204	0.0544931
Caproiciproducens	0.0108298	0.12503	0.00358151	0.0330115	0.00699949	0.0240785	0.00592835	0.146244	0.00470712	0.00426029	0.00551276	0.0104763	0.177215	0.140889	0.00335924	0.197541	0.00592835	0.0137035	0.051072	0.0697244	0.0163568	0.0163568	0.00550873	0.000942623	0.00335836	0.0249934	0.0265266	0.0188936	0.0305985	0.179244	0.00470436	0.00699606	0.000942623	0.00425905	0.0137005	0.193771	0.0104724	0.145694	0.0390733	0.0627825
Spirosoma	0.0346553	0.0888768	0.00477535	0.0627218	0.00787443	0.0500093	0.0270069	0.125859	0.0161387	0.0219101	0.0399675	0.0128044	0.131568	0.145804	0.0107496	0.0945676	0.0270069	0.0169663	0.0510701	0.0462661	0.0142462	0.0142462	0.0399383	0.0292213	0.0107468	0.0657722	0.0318319	0.103915	0.0754763	0.107546	0.0161292	0.00787057	0.0292213	0.0219037	0.0169625	0.157439	0.0127996	0.125385	0.0489251	0.0459543
Gordonibacter	0.0303234	0.119005	0.00298459	0.0676735	0.00349975	0.0518615	0.00526964	0.0992688	0.000672445	0.00365168	0.00551276	0.00349211	0.161104	0.224439	0.0013437	0.128192	0.00526964	0.00456785	0.0510073	0.0678624	0.00474874	0.00474874	0.00550873	0.00377049	0.00134335	0.0605104	0.0344846	0.134144	0.0958753	0.0896218	0.000672052	0.00349803	0.00377049	0.00365061	0.00456684	0.232122	0.00349081	0.0988954	0.0436346	0.0639961
Nostoc	0.0151617	0.109966	0.00596919	0.0759264	0.0174987	0.0500093	0.0118567	0.140926	0.012104	0.0115636	0.0399675	0.0151325	0.123513	0.139251	0.0114214	0.109278	0.0118567	0.0150086	0.0509117	0.0505648	0.0137186	0.0137186	0.0399383	0.00471311	0.0114184	0.0381479	0.0331583	0.0869105	0.0469177	0.224054	0.0120969	0.0174902	0.00471311	0.0115603	0.0150053	0.147347	0.0151268	0.140396	0.0486906	0.0615697
Butyricimonas	0.0151617	0.114485	0.00358151	0.0462161	0.00174987	0.0333395	0.011198	0.172834	0.00268978	0.00547752	0.00826913	0.0162965	0.174529	0.178569	0.00604664	0.107177	0.011198	0.00326275	0.0506712	0.0663142	0.0284924	0.0284924	0.0082631	0	0.00604506	0.0394633	0.0238739	0.047234	0.0550773	0.125471	0.00268821	0.00174902	0	0.00547592	0.00326203	0.171568	0.0162904	0.172184	0.0408683	0.0564637
Collinsella	0.0173276	0.165703	0.00119384	0.0379632	0.00437468	0.0296351	0.00263482	0.144472	0.00268978	0.00243445	0.00551276	0.00349211	0.144994	0.165463	0.00403109	0.170222	0.00263482	0.0013051	0.0503379	0.0697995	0.0042211	0.0042211	0.00550873	0.000942623	0.00403004	0.0276243	0.0172423	0.026451	0.0530374	0.152357	0.00268821	0.00437254	0.000942623	0.00243374	0.00130481	0.155421	0.00349081	0.143928	0.0339009	0.0553597
Pectobacterium	0.134289	0.046698	0.0155199	0.0874804	0.0454967	0.107427	0.0368875	0.0407711	0.024208	0.018867	0.0372111	0.0384132	0.0671267	0.0638915	0.0161244	0.0672481	0.0368875	0.0182714	0.0501566	0.0328332	0.0385175	0.0385175	0.0371839	0.0301639	0.0161201	0.138122	0.0689692	0.111472	0.0448778	0.0537731	0.0241939	0.0454744	0.0301639	0.0188615	0.0182673	0.0726642	0.0383989	0.0406177	0.048131	0.0322159
Virgibacillus	0.0216596	0.0949024	0.00477535	0.0330115	0.0174987	0.0277829	0.00526964	0.142699	0.00537956	0.010955	0.0110255	0.0186246	0.171844	0.157271	0.00739034	0.15341	0.00526964	0.00978825	0.0499198	0.0622122	0.0131909	0.0131909	0.0110175	0.00377049	0.0073884	0.0368324	0.0238739	0.0453446	0.0469177	0.259903	0.00537642	0.0174902	0.00377049	0.0109518	0.00978608	0.157439	0.0186176	0.142162	0.0459458	0.0695287
Helicobacter	0.0216596	0.093396	0.00298459	0.0610712	0.0174987	0.0444527	0.0158089	0.124086	0.0114316	0.00547752	0.0248074	0.0174605	0.163789	0.147442	0.00873404	0.0987706	0.0158089	0.0150086	0.0494271	0.0524906	0.0121357	0.0121357	0.0247893	0.0103688	0.00873175	0.0460405	0.0252003	0.0717956	0.0305985	0.143395	0.0114249	0.0174902	0.0103688	0.00547592	0.0150053	0.187716	0.017454	0.123619	0.0429858	0.0536125
Sinorhizobium	0.0324893	0.0572427	0.00716302	0.0528184	0.0349975	0.0444527	0.0263482	0.179038	0.0463987	0.0279962	0.0248074	0.0197886	0.0939774	0.106486	0.0127651	0.0693496	0.0263482	0.0228392	0.0491837	0.0419266	0.0216331	0.0216331	0.0247893	0.0245082	0.0127618	0.0460405	0.0291793	0.0566808	0.061197	0.0896218	0.0463716	0.0349803	0.0245082	0.027988	0.0228342	0.0827564	0.0197812	0.178365	0.0458683	0.0396589
Morganella	0.00433191	0.0286214	0.00179076	0.450607	0.00787443	0.255603	0.00658705	0.0265899	0.0073969	0.00730336	0.00826913	0.0139684	0.0134253	0.0147442	0.00470294	0.012609	0.00658705	0.00717805	0.0487883	0.115868	0.00791456	0.00791456	0.0082631	0.0103688	0.00470171	0.263089	0.0344846	0.211608	0.179511	0.00896218	0.00739257	0.00787057	0.0103688	0.00730122	0.00717646	0.0322952	0.0139632	0.0264898	0.0472042	0.0804294
Actinoplanes	0.0324893	0.112979	0.00835686	0.0957333	0.0166238	0.0685312	0.0316178	0.0930645	0.0282427	0.018867	0.0165383	0.0197886	0.0832371	0.0884651	0.0107496	0.0924661	0.0316178	0.0241443	0.0485285	0.0360712	0.0168844	0.0168844	0.0165262	0.0197951	0.0107468	0.0657722	0.0530532	0.0699063	0.0713965	0.107546	0.0282262	0.0166157	0.0197951	0.0188615	0.024139	0.111015	0.0197812	0.0927144	0.0433144	0.0342876
Anaerobutyricum	0.00649787	0.122017	0.00477535	0.0379632	0.0096243	0.0240785	0.00526964	0.14004	0.00201734	0.00426029	0.0137819	0.0151325	0.158419	0.180207	0.00604664	0.123989	0.00526964	0.0091357	0.0482514	0.0633995	0.0105528	0.0105528	0.0137718	0.00188525	0.00604506	0.0184162	0.00663165	0.0245617	0.0163192	0.259903	0.00201616	0.00961959	0.00188525	0.00425905	0.00913367	0.191753	0.0151268	0.139513	0.0412192	0.0748866
Litorilituus	0.0151617	0.0888768	0.00835686	0.0313609	0.00612456	0.0240785	0.0105393	0.117882	0.00268978	0.0115636	0.0165383	0.0162965	0.161104	0.139251	0.0584509	0.12609	0.0105393	0.0163137	0.0478454	0.0533133	0.00105528	0.00105528	0.0165262	0.000942623	0	0.00131544	0.00530532	0.00566808	0.0040798	0.00896218	0.000672052	0.000874508	0.000942623	0.00182531	0	0.0100922	0	0.0105959	0.00388405	0.00474787
Calothrix	0.0303234	0.0964088	0.00119384	0.0676735	0.0096243	0.0518615	0.00790446	0.11345	0.00672445	0.0146067	0.0192946	0.0116404	0.142309	0.139251	0.00873404	0.121887	0.00790446	0.0091357	0.0477737	0.0514019	0.00949748	0.00949748	0.0192806	0.00377049	0.00873175	0.0407787	0.0238739	0.0529021	0.0652768	0.0627353	0.00672052	0.00961959	0.00377049	0.0146024	0.00913367	0.14331	0.011636	0.113023	0.0337867	0.040014
Nocardioides	0.0411532	0.0813449	0.0101476	0.0858298	0.0288729	0.066679	0.0210786	0.110791	0.0228631	0.0243445	0.0344547	0.0291009	0.0832371	0.0802739	0.0107496	0.0735526	0.0210786	0.0221867	0.0470966	0.031471	0.0200502	0.0200502	0.0344296	0.0245082	0.0107468	0.0907656	0.0663165	0.102025	0.108115	0.0537731	0.0228498	0.0288588	0.0245082	0.0243374	0.0221818	0.127162	0.0290901	0.110374	0.051119	0.0387552
Anaerotignum	0.00216596	0.137081	0.00298459	0.00825287	0	0.00555658	0.00395223	0.148017	0.00201734	0.00365168	0.00413457	0.0139684	0.187955	0.172016	0.00604664	0.12609	0.00395223	0.0078306	0.0464262	0.0699536	0.00580401	0.00580401	0.00413155	0.000942623	0.00604506	0.00263089	0.00265266	0.0151149	0.0101995	0.170281	0.00201616	0	0.000942623	0.00365061	0.00782886	0.173587	0.0139632	0.14746	0.0318364	0.0610551
Brachyspira	0.0151617	0.0858641	0.00477535	0.0627218	0.0157489	0.0426005	0.0131741	0.128518	0.00470712	0.00791197	0.0179165	0.0186246	0.158419	0.129421	0.00806219	0.0966691	0.0131741	0.0110933	0.0463646	0.0508307	0.017412	0.017412	0.0179034	0.00659836	0.00806007	0.0499868	0.0291793	0.0642382	0.0509975	0.233017	0.00470436	0.0157411	0.00659836	0.00790966	0.0110909	0.2079	0.0186176	0.128034	0.0497445	0.069167
Echinicola	0.0151617	0.0949024	0.00298459	0.0577701	0.00612456	0.0388961	0.0237134	0.0957235	0.0168111	0.0152153	0.111633	0.0139684	0.0912923	0.0999328	0.0201555	0.0756541	0.0237134	0.0215341	0.0458437	0.0380994	0.00896984	0.00896984	0.111552	0.0160246	0.0201502	0.047356	0.0252003	0.0415659	0.0469177	0.0896218	0.0168013	0.00612156	0.0160246	0.0152109	0.0215294	0.137255	0.0139632	0.0953634	0.0410332	0.039999
Chromobacterium	0.0303234	0.0512172	0.0095507	0.0462161	0.0594957	0.0388961	0.0526964	0.0531797	0.0658996	0.0316479	0.0372111	0.0419053	0.0751819	0.060615	0.0275458	0.0525376	0.0526964	0.0358902	0.0457059	0.0157565	0.0395728	0.0395728	0.0371839	0.0546721	0.0275386	0.0342015	0.0504006	0.0358978	0.0550773	0.0358487	0.0658611	0.0594666	0.0546721	0.0316386	0.0358823	0.058535	0.0418897	0.0529797	0.0450495	0.0113463
Proteiniphilum	0.0151617	0.0903832	0.00238767	0.0742758	0.00524962	0.0481571	0.00988058	0.102814	0.00806934	0.0273876	0.0427239	0.00349211	0.153049	0.117954	0.00806219	0.0840601	0.00988058	0.00717805	0.0450092	0.0471179	0.00896984	0.00896984	0.0426927	0.00471311	0.00806007	0.0420942	0.0424426	0.0566808	0.0775162	0.0537731	0.00806462	0.00524705	0.00471311	0.0273796	0.00717646	0.0888117	0.00349081	0.102427	0.0329568	0.0320966
Hymenobacter	0.0173276	0.00753194	0.0095507	0.0165057	0.113742	0.0166698	0.102758	0.0132949	0.104229	0.0572096	0.0399675	0.0744983	0.00268507	0.00819122	0.0369517	0.00420301	0.102758	0.0704754	0.0443638	0.040229	0.0342964	0.0342964	0.0702363	0.0546721	0.0255236	0.238095	0.233434	0.385429	0.375342	0.322638	0.0557803	0.0454744	0.0546721	0.0292049	0.0221818	0.425893	0.0337445	0.358496	0.155523	0.153551
Leminorella	0.0866382	0.0301277	0.00537227	0.249237	0.0218734	0.177811	0.0138328	0.0274762	0.0161387	0.0121723	0.0303202	0.0116404	0.0241656	0.0344031	0.00403109	0.0231165	0.0138328	0.00978825	0.0439987	0.0654513	0.00263819	0.00263819	0.00413155	0.00565574	0.00134335	0.00263089	0.00265266	0.00755744	0	0.0179244	0.00537642	0.00612156	0.00565574	0.00365061	0.000652405	0.0222029	0.00465441	0.0158939	0.0061878	0.00617065
Caldicellulosiruptor	0.00649787	0.106953	0.00537227	0.0297103	0.0122491	0.0203741	0.00724576	0.135608	0.00134489	0.0048689	0.00964732	0.0116404	0.161104	0.124506	0.00739034	0.134496	0.00724576	0.0052204	0.0439709	0.0576665	0.0042211	0.0042211	0.00964028	0.00471311	0.0073884	0.0210471	0.0106106	0.0396765	0.0224389	0.197168	0.0013441	0.0122431	0.00471311	0.00486748	0.00521924	0.183679	0.011636	0.135098	0.0377736	0.0634222
Alteromonas	0.0389872	0.100928	0.00417843	0.0445655	0.0192486	0.0426005	0.0164676	0.0771106	0.0168111	0.010955	0.0854477	0.0232807	0.104718	0.0933799	0.0114214	0.0735526	0.0164676	0.0078306	0.043775	0.0355001	0.0179397	0.0179397	0.0853853	0.0235656	0.0114184	0.0381479	0.0530532	0.0302297	0.0428379	0.116508	0.0168013	0.0192392	0.0235656	0.0109518	0.00782886	0.127162	0.0232721	0.0768205	0.0412593	0.0364396
Oblitimonas	0.0108298	0.0120511	0	0.00660229	0.00612456	0.00926097	0.00790446	0.00797696	0.000672445	0.00243445	0.683582	0	0.00537014	0.00819122	0.0026874	0.012609	0.00790446	0	0.0435667	0.15978	0.0042211	0.0042211	0.683083	0.0188525	0.00268669	0.00263089	0.00530532	0.00188936	0.0142793	0.00896218	0.000672052	0.00612156	0.0188525	0.00243374	0	0.00605535	0	0.00794695	0.0437896	0.159652
Rufibacter	0.0368212	0.0903832	0.00119384	0.0825287	0.00262481	0.0629746	0.00988058	0.0850875	0.0154662	0.00973781	0.0344547	0.00465614	0.128883	0.101571	0.00537479	0.0903646	0.00988058	0.0078306	0.0433175	0.0424931	0.00580401	0.00580401	0.0344296	0.00942623	0.00537338	0.047356	0.0424426	0.0547914	0.110155	0.125471	0.0154572	0.00262352	0.00942623	0.00973497	0.00782886	0.098904	0.00465441	0.0847675	0.0374694	0.0409463
Chitinophaga	0.0259915	0.0888768	0.00179076	0.0561195	0.00349975	0.0426005	0.011198	0.11345	0.0127765	0.0170412	0.0330765	0.0151325	0.131568	0.114677	0.00873404	0.0798571	0.011198	0.0104408	0.0432238	0.0432821	0.00685929	0.00685929	0.0330524	0.0207377	0.00873175	0.0460405	0.0265266	0.0547914	0.0591571	0.161319	0.012769	0.00349803	0.0207377	0.0170362	0.0104385	0.104959	0.0151268	0.113023	0.0400925	0.0441472
Desulfotomaculum	0.00433191	0.112979	0.00119384	0.0297103	0.0096243	0.0185219	0.00461094	0.101041	0.0073969	0.00547752	0.0151601	0.0186246	0.136938	0.157271	0.00604664	0.132395	0.00461094	0.00587295	0.0428782	0.0558402	0.00474874	0.00474874	0.015149	0.00188525	0.00604506	0.0144699	0.0145896	0.0245617	0.0183591	0.125471	0.00739257	0.00961959	0.00188525	0.00547592	0.00587165	0.121107	0.0186176	0.100661	0.0278144	0.0411997
Monoglobus	0.00216596	0.129549	0.00238767	0.0132046	0.00262481	0.00926097	0.00395223	0.11345	0	0.00121723	0.00137819	0.00931229	0.177215	0.162186	0.00537479	0.130293	0.00395223	0.00195765	0.042749	0.0650233	0.0084422	0.0084422	0.00137718	0	0.00537338	0.011839	0.00530532	0.0132255	0.0142793	0.143395	0	0.00262352	0	0.00121687	0.00195722	0.18166	0.00930882	0.113023	0.0289705	0.0553326
Amycolatopsis	0.0368212	0.0798385	0.00596919	0.089131	0.0201235	0.066679	0.0197612	0.0939508	0.0262254	0.0158239	0.0234292	0.0151325	0.0966625	0.0737209	0.00671849	0.0504361	0.0197612	0.0247969	0.042499	0.0319523	0.0153015	0.0153015	0.0234121	0.0141393	0.00671673	0.0841884	0.0530532	0.073685	0.0713965	0.0627353	0.02621	0.0201137	0.0141393	0.0158193	0.0247914	0.111015	0.0151268	0.0935974	0.0411523	0.033089
Acidaminococcus	0.00649787	0.114485	0.00417843	0.034662	0.00174987	0.0222263	0.00131741	0.13029	0	0.00243445	0.00413457	0.00698422	0.163789	0.142527	0	0.109278	0.00131741	0.0065255	0.0417999	0.059206	0.0042211	0.0042211	0.00413155	0	0	0.0315706	0.0185686	0.0566808	0.0428379	0.143395	0	0.00174902	0	0.00243374	0.00652405	0.147347	0.00698162	0.1298	0.033359	0.05181
Thauera	0.0368212	0.0391661	0.00716302	0.0379632	0.0647453	0.0370439	0.0559899	0.051407	0.0497609	0.0334737	0.050993	0.0570378	0.0295358	0.0442326	0.0174681	0.0357255	0.0559899	0.0469836	0.04175	0.0144543	0.0327135	0.0327135	0.0509558	0.0631557	0.0174635	0.0486714	0.0490742	0.0547914	0.0428379	0.0537731	0.0497319	0.0647136	0.0631557	0.0334639	0.0469732	0.0565166	0.0570165	0.0512137	0.0482742	0.0124456
Desulfitobacterium	0.0151617	0.093396	0.00298459	0.0214575	0.0104992	0.0185219	0.00724576	0.121427	0.00403467	0.00852058	0.00826913	0.00931229	0.131568	0.119592	0.0262021	0.130293	0.00724576	0.0137035	0.0416353	0.050427	0.0105528	0.0105528	0.0082631	0.00282787	0.0261952	0.0184162	0.0145896	0.0321191	0.0224389	0.0358487	0.00403231	0.0104941	0.00282787	0.00851809	0.0137005	0.14331	0.00930882	0.12097	0.0274981	0.0394071
Providencia	0.047651	0.0436852	0.00179076	0.0825287	0.0104992	0.066679	0.011198	0.0691336	0.0107591	0.010955	0.0716658	0.0128044	0.0886073	0.0966563	0.0026874	0.0966691	0.011198	0.00848315	0.041314	0.0359821	0.0253266	0.0253266	0.0716135	0.00942623	0.00268669	0.293344	0.133959	0.258842	0.240708	0.0268865	0.0107528	0.0104941	0.00942623	0.0109518	0.00848127	0.0948671	0.0127996	0.0688736	0.0730426	0.0953463
Fibrobacter	0.0346553	0.0527235	0.00119384	0.249237	0.000874937	0.155584	0.00197612	0.0522934	0	0.000608613	0	0.00814825	0.0483312	0.0737209	0.00201555	0.0588421	0.00197612	0.0013051	0.0413048	0.0658192	0.00105528	0.00105528	0	0.00282787	0.00201502	0.127598	0.0517269	0.971131	0.444698	0.0627353	0	0.000874508	0.00282787	0.000608435	0.00130481	0.0746826	0.00814522	0.0520967	0.100299	0.241448
Slackia	0.00866382	0.12503	0.00119384	0.0429149	0.00787443	0.0277829	0.00790446	0.108132	0.00672445	0.00304307	0.00413457	0.00465614	0.147679	0.132698	0.0013437	0.0945676	0.00790446	0.00195765	0.0407891	0.0535307	0.00633165	0.00633165	0.00413155	0.00471311	0.00134335	0.0223625	0.0185686	0.0188936	0.0448778	0.134433	0.00672052	0.00787057	0.00471311	0.00304218	0.00195722	0.125144	0.00465441	0.107725	0.0291008	0.0444547
Odoribacter	0.00866382	0.0979152	0.00358151	0.0495172	0.00174987	0.0314873	0.00856317	0.139154	0.00201734	0.00608613	0.0151601	0.00814825	0.118143	0.119592	0.00806219	0.0987706	0.00856317	0.00456785	0.0405412	0.0494001	0.0253266	0.0253266	0.015149	0.000942623	0.00806007	0.035517	0.0172423	0.0529021	0.0387581	0.143395	0.00201616	0.00174902	0.000942623	0.00608435	0.00456684	0.135236	0.00814522	0.13863	0.0366661	0.0493725
Carnobacterium	0.00866382	0.0451916	0.00298459	0.0313609	0.027123	0.0222263	0.0454507	0.0558387	0.00268978	0.0164326	0.0358329	0.065186	0.0671267	0.0917416	0.0510605	0.105075	0.0454507	0.0065255	0.0403312	0.0294395	0.126105	0.126105	0.0358068	0.0688114	0.0510471	0.023678	0.0185686	0.026451	0.0285586	0.179244	0.00268821	0.0271098	0.0688114	0.0164278	0.00652405	0.111015	0.0651617	0.0556286	0.0576523	0.0488715
Sorangium	0.0281574	0.0647746	0.00358151	0.0825287	0.0262481	0.0592702	0.0230547	0.0717926	0.0349672	0.0219101	0.028942	0.0279369	0.0698118	0.0557003	0.0161244	0.0630451	0.0230547	0.0241443	0.0402802	0.0231888	0.0226884	0.0226884	0.0289208	0.0197951	0.0161201	0.0855038	0.0636639	0.0906892	0.081596	0.0268865	0.0349467	0.0262352	0.0197951	0.0219037	0.024139	0.0746826	0.0279265	0.0715225	0.0422058	0.0268545
Rhodopseudomonas	0.0303234	0.0436852	0.00716302	0.0528184	0.0262481	0.0426005	0.0270069	0.114336	0.0403467	0.0243445	0.0330765	0.031429	0.0671267	0.067168	0.00739034	0.0546391	0.0270069	0.026102	0.0401562	0.0251117	0.0163568	0.0163568	0.0330524	0.0245082	0.0073884	0.0368324	0.0331583	0.0793531	0.0509975	0.0716974	0.0403231	0.0262352	0.0245082	0.0243374	0.0260962	0.0544981	0.0314173	0.113906	0.0395013	0.026358
Thiomonas	0.0194936	0.0225958	0.00298459	0.0181563	0.0647453	0.0185219	0.102099	0.0283625	0.0847281	0.0322565	0.0358329	0.0256088	0.0322208	0.0294884	0.0241866	0.0357255	0.102099	0.0352377	0.0396858	0.0289398	0.0274372	0.0274372	0.0358068	0.0688114	0.0241802	0.0302552	0.0437689	0.0151149	0.0183591	0.0268865	0.0846786	0.0647136	0.0688114	0.0322471	0.0352299	0.0302767	0.0255993	0.0282558	0.038215	0.0198297
Novosphingobium	0.0324893	0.0557363	0.00298459	0.0511678	0.0201235	0.0426005	0.0210786	0.104587	0.0484161	0.0255617	0.0344547	0.0162965	0.0671267	0.0638915	0.0120933	0.0630451	0.0210786	0.0247969	0.0393071	0.025204	0.0168844	0.0168844	0.0344296	0.0358197	0.0120901	0.0486714	0.0305056	0.0699063	0.0530374	0.0268865	0.0483877	0.0201137	0.0358197	0.0255543	0.0247914	0.0807379	0.0162904	0.104193	0.0389447	0.024904
Myxococcus	0.0324893	0.0783321	0.00835686	0.077577	0.0192486	0.057418	0.0171263	0.0833149	0.0161387	0.0164326	0.00964732	0.00465614	0.0886073	0.0802739	0.0107496	0.0693496	0.0171263	0.020229	0.0392819	0.0315988	0.0105528	0.0105528	0.00964028	0.0216803	0.0107468	0.080242	0.0570322	0.0982467	0.0775162	0.0627353	0.0161292	0.0192392	0.0216803	0.0164278	0.0202246	0.104959	0.00465441	0.0830015	0.0402923	0.0348726
Herminiimonas	0.0151617	0.0135575	0.00298459	0.00990344	0.0489964	0.0129654	0.0428158	0.0443164	0.103557	0.14059	0.0633967	0.0384132	0.0187955	0.0278501	0.0141088	0.0105075	0.0428158	0.052204	0.0390522	0.0354933	0.0258542	0.0258542	0.0633504	0.0405328	0.0141051	0.011839	0.00530532	0.0113362	0.0122394	0.00896218	0.103496	0.0489725	0.0405328	0.140549	0.0521924	0.0141291	0.0383989	0.0441497	0.0389888	0.0353225
Cellulosilyticum	0.0108298	0.0768257	0.00716302	0.0280598	0.00874937	0.0203741	0.00592835	0.101928	0.00268978	0.0091292	0.00964732	0.0174605	0.104718	0.122868	0.0161244	0.12609	0.00592835	0.0156612	0.038343	0.0449188	0.0153015	0.0153015	0.00964028	0.0084836	0.0161201	0.0131544	0.011937	0.0113362	0.0122394	0.188206	0.00268821	0.00874508	0.0084836	0.00912653	0.0156577	0.167531	0.017454	0.101544	0.0351639	0.0562651
Maricaulis	0.047651	0.0723066	0.000596919	0.0247586	0.00524962	0.0351917	0.0184437	0.0779969	0.0161387	0.0127809	0.0358329	0.0104763	0.0993475	0.104848	0.0114214	0.0798571	0.0184437	0.0176188	0.0382756	0.0336682	0.00105528	0.00105528	0.00413155	0	0.000671673	0.00526177	0	0.00377872	0.0040798	0	0.00470436	0.000874508	0	0.00243374	0.00130481	0.00605535	0	0.00882994	0.0024576	0.00259862
Fermentimonas	0.00649787	0.0858641	0.00179076	0.023108	0.00349975	0.0166698	0.0138328	0.0788832	0.00336223	0.0401685	0.0702876	0.0128044	0.077867	0.103209	0.0127651	0.0840601	0.0138328	0.00717805	0.0364267	0.035718	0.00738693	0.00738693	0.0702363	0.00565574	0.0127618	0.0249934	0.00928431	0.0226723	0.0285586	0.143395	0.00336026	0.00349803	0.00565574	0.0401567	0.00717646	0.145328	0.0127996	0.0785865	0.0349385	0.0454045
Alcanivorax	0.0281574	0.0361533	0.00417843	0.034662	0.041997	0.0314873	0.0322766	0.0443164	0.0416916	0.0164326	0.073044	0.0256088	0.077867	0.054062	0.0188118	0.0483346	0.0322766	0.0117459	0.0362835	0.0191559	0.0237437	0.0237437	0.0729907	0.0320492	0.0188068	0.0263089	0.0318319	0.0302297	0.0265187	0.0806596	0.0416672	0.0419764	0.0320492	0.0164278	0.0117433	0.0625719	0.0255993	0.0441497	0.035726	0.0190095
Aminipila	0.00433191	0.12503	0.00238767	0.00660229	0.00262481	0.00555658	0.00592835	0.121427	0.00201734	0.00426029	0.00413457	0	0.128883	0.114677	0.00806219	0.0987706	0.00592835	0.00587295	0.0359164	0.0525746	0.00738693	0.00738693	0.00413155	0.00377049	0.00806007	0.011839	0.00265266	0.0094468	0.0183591	0.098584	0.00201616	0.00262352	0.00377049	0.00425905	0.00587165	0.129181	0	0.12097	0.0244616	0.0427897
Cronobacter	0.0411532	0.0376597	0.00358151	0.0610712	0.0358724	0.0518615	0.0184437	0.0354531	0.024208	0.0158239	0.044102	0.0267728	0.0939774	0.054062	0.013437	0.0483346	0.0184437	0.0163137	0.0355873	0.0217031	0.0237437	0.0237437	0.0440699	0.034877	0.0134335	0.035517	0.0411162	0.073685	0.0632369	0.0627353	0.0241939	0.0358548	0.034877	0.0158193	0.0163101	0.0544981	0.0267629	0.0353198	0.0366552	0.01738
Desulfosporosinus	0.0129957	0.0798385	0.00358151	0.0264092	0.00524962	0.0203741	0.0138328	0.0771106	0.00537956	0.00791197	0.0206728	0.0151325	0.0993475	0.0933799	0.0114214	0.100872	0.0138328	0.0287122	0.0353364	0.0359874	0.0121357	0.0121357	0.0206577	0.0113115	0.0114184	0.011839	0.011937	0.0340085	0.0183591	0.107546	0.00537642	0.00524705	0.0113115	0.00790966	0.0287058	0.115052	0.0151268	0.0768205	0.0287166	0.0342281
Francisella	0.0173276	0.0813449	0.00358151	0.0511678	0.00699949	0.0370439	0.00988058	0.0788832	0.00268978	0.0048689	0.0151601	0.00814825	0.118143	0.0884651	0.00671849	0.0798571	0.00988058	0.0123984	0.0351422	0.0374518	0.0179397	0.0179397	0.015149	0.00471311	0.00671673	0.0342015	0.0291793	0.0566808	0.0367182	0.125471	0.00268821	0.00699606	0.00471311	0.00486748	0.0123957	0.147347	0.00814522	0.0785865	0.0339138	0.0425454
Flammeovirga	0.0108298	0.093396	0.00238767	0.034662	0	0.0240785	0.00856317	0.0930645	0.00336223	0.010955	0.0206728	0.00931229	0.102033	0.111401	0.00537479	0.0735526	0.00856317	0.00978825	0.0345553	0.03981	0.0084422	0.0084422	0.0206577	0.00942623	0.00537338	0.0315706	0.0225476	0.0321191	0.0265187	0.116508	0.00336026	0	0.00942623	0.0109518	0.00978608	0.153402	0.00930882	0.0927144	0.0316975	0.0433499
Pelosinus	0.00866382	0.0436852	0.0101476	0.0132046	0.0104992	0.0111132	0.0138328	0.0726789	0.00537956	0.00791197	0.028942	0.180426	0.0724968	0.0491473	0.0120933	0.0504361	0.0138328	0.0169663	0.0345254	0.0425891	0.606783	0.606783	0.0289208	0.0084836	0.0120901	0.0105235	0.00530532	0.0170042	0.0040798	0.0806596	0.00537642	0.0104941	0.0084836	0.00790966	0.0169625	0.0888117	0.180358	0.0724055	0.0984131	0.190397
Altererythrobacter	0.0194936	0.0632683	0.00477535	0.0462161	0.0122491	0.0351917	0.0210786	0.0788832	0.018156	0.0152153	0.0358329	0.0104763	0.0859222	0.0622532	0.00604664	0.0609436	0.0210786	0.0176188	0.03415	0.0258086	0.00738693	0.00738693	0.0358068	0.0141393	0.00604506	0.0276243	0.0278529	0.0453446	0.0326384	0.0448109	0.0181454	0.0122431	0.0141393	0.0152109	0.0176149	0.0544981	0.0104724	0.0785865	0.0261082	0.0195581
Winogradskyella	0.0433191	0.0602555	0.000596919	0.0198069	0.00612456	0.0296351	0.0164676	0.064702	0.0134489	0.0146067	0.0413457	0.0139684	0.0886073	0.0933799	0.0100777	0.0693496	0.0164676	0.0091357	0.0339608	0.0293544	0.0042211	0.0042211	0.0413155	0.00188525	0.0100751	0.035517	0.015916	0.0226723	0.0244788	0.0537731	0.013441	0.00612156	0.00188525	0.0146024	0.00913367	0.104959	0.0139632	0.0644586	0.0245911	0.0269715
Paucibacter	0.0281574	0.00753194	0.00417843	0.023108	0.0874937	0.0259307	0.0790446	0.0186129	0.0806934	0.045646	0.0124037	0.033757	0.0187955	0.00982946	0.022171	0.00840601	0.0790446	0.0254494	0.033903	0.0281067	0.0401005	0.0401005	0.0123946	0.11877	0.0221652	0.0223625	0.0371372	0.0245617	0.0305985	0	0.0806462	0.0874508	0.11877	0.0456327	0.0254438	0.0121107	0.0337445	0.0185429	0.0428074	0.0351622
Aquitalea	0.0108298	0.027115	0.00477535	0.0181563	0.0874937	0.0148176	0.0526964	0.0274762	0.0638823	0.0352996	0.0234292	0.0360851	0.037591	0.0409561	0.0174681	0.0441316	0.0526964	0.0117459	0.0337025	0.0211468	0.0469598	0.0469598	0.0234121	0.0527869	0.0174635	0.0223625	0.019895	0.0396765	0.020399	0.0358487	0.0638449	0.0874508	0.0527869	0.0352893	0.0117433	0.0262398	0.0360717	0.0273728	0.0370313	0.0190512
Bosea	0.0108298	0.0391661	0.0095507	0.0330115	0.0209985	0.0240785	0.0243721	0.148017	0.0376569	0.0261704	0.0192946	0.0221167	0.0483312	0.0409561	0.00873404	0.0420301	0.0243721	0.0241443	0.0335461	0.0307716	0.0131909	0.0131909	0.0192806	0.0292213	0.00873175	0.0289398	0.0172423	0.0529021	0.0571172	0.0179244	0.0376349	0.0209882	0.0292213	0.0261627	0.024139	0.0423874	0.0221084	0.14746	0.0337691	0.0312942
Erythrobacter	0.0238255	0.0557363	0.00238767	0.0363126	0.013999	0.0314873	0.0210786	0.0726789	0.0275703	0.018867	0.0303202	0.0139684	0.0832371	0.0655297	0.00873404	0.0567406	0.0210786	0.0137035	0.0331809	0.0236095	0.0105528	0.0105528	0.030298	0.015082	0.00873175	0.0276243	0.0212213	0.0396765	0.0509975	0.0268865	0.0275541	0.0139921	0.015082	0.0188615	0.0137005	0.0867933	0.0139632	0.0724055	0.0279987	0.0218842
Bartonella	0.0173276	0.0436852	0.00179076	0.0511678	0.00699949	0.0370439	0.00922187	0.0824285	0.00806934	0.00243445	0.00826913	0.0104763	0.120828	0.0901034	0.00873404	0.0714511	0.00922187	0.00848315	0.032652	0.0361742	0.0084422	0.0084422	0.0082631	0.00377049	0.00873175	0.0302552	0.015916	0.0434553	0.040798	0.0806596	0.00806462	0.00699606	0.00377049	0.00243374	0.00848127	0.131199	0.0104724	0.0821185	0.0279039	0.0357984
Exiguobacterium	0.049817	0.0677874	0	0.0709747	0.00262481	0.0611224	0.00461094	0.054066	0.00268978	0.00669474	0.00551276	0.00465614	0.0832371	0.0835504	0.00470294	0.0756541	0.00461094	0.00326275	0.0325319	0.0339051	0.00316583	0.00316583	0.00550873	0.000942623	0.00470171	0.182847	0.135286	0.0887999	0.0591571	0.098584	0.00268821	0.00262352	0.000942623	0.00669279	0.00326203	0.0867933	0.00465441	0.0538627	0.0413154	0.0556847
Gordonia	0.0194936	0.0451916	0.00238767	0.0511678	0.013124	0.0370439	0.0158089	0.0762242	0.0154662	0.0273876	0.0165383	0.0116404	0.0751819	0.0737209	0.00537479	0.0609436	0.0158089	0.013051	0.0319753	0.0253165	0.0153015	0.0153015	0.0165262	0.0160246	0.00537338	0.0486714	0.0331583	0.0566808	0.0448778	0.0806596	0.0154572	0.0131176	0.0160246	0.0273796	0.0130481	0.0625719	0.011636	0.0759375	0.0315415	0.0239181
Rhodobacter	0.0324893	0.046698	0.00716302	0.0412643	0.00874937	0.0370439	0.0171263	0.100155	0.0195009	0.0133895	0.0234292	0.00931229	0.0590715	0.0589768	0.00604664	0.0609436	0.0171263	0.0156612	0.0318971	0.0253238	0.00791456	0.00791456	0.0234121	0.015082	0.00604506	0.0407787	0.0344846	0.0566808	0.0448778	0.0448109	0.0194895	0.00874508	0.015082	0.0133856	0.0156577	0.0524797	0.00930882	0.0997784	0.0286627	0.024424
Herbinix	0.00216596	0.0753194	0.00656611	0.0148552	0.0201235	0.00926097	0.00988058	0.0691336	0.00134489	0.0091292	0.00275638	0.0186246	0.128883	0.0769974	0.0167962	0.0609436	0.00988058	0.0404581	0.03184	0.0357861	0.0163568	0.0163568	0.00275437	0.00565574	0.0167918	0.00526177	0.00530532	0.0245617	0.0101995	0.134433	0.0013441	0.0201137	0.00565574	0.00912653	0.0404491	0.0928486	0.0186176	0.0688736	0.0274836	0.0359448
Moraxella	0.0259915	0.0512172	0.00179076	0.0264092	0.027998	0.0259307	0.0204199	0.064702	0.0262254	0.0152153	0.0468584	0.0244448	0.0563864	0.0622532	0.00739034	0.0567406	0.0204199	0.00978825	0.0316768	0.0196316	0.0300753	0.0300753	0.0468242	0.0235656	0.0073884	0.0263089	0.0318319	0.0491233	0.040798	0.0716974	0.02621	0.0279843	0.0235656	0.0152109	0.00978608	0.0787195	0.0244357	0.0644586	0.0348922	0.0201786
Draconibacterium	0.0108298	0.0888768	0.00119384	0.023108	0.00437468	0.0185219	0.0118567	0.0735653	0.00403467	0.0103464	0.022051	0.00582018	0.0912923	0.113039	0.00873404	0.0609436	0.0118567	0.00848315	0.0316071	0.0361717	0.00580401	0.00580401	0.0220349	0.00471311	0.00873175	0.0144699	0.019895	0.0226723	0.0305985	0.0806596	0.00403231	0.00437254	0.00471311	0.0103434	0.00848127	0.121107	0.00581801	0.0732885	0.0248633	0.0328938
Erwinia	0.0129957	0.0376597	0.00656611	0.0643724	0.0262481	0.0426005	0.022396	0.0469754	0.0235356	0.018867	0.044102	0.0384132	0.0510163	0.0425943	0.0114214	0.0462331	0.022396	0.0104408	0.0316019	0.0165135	0.0269095	0.0269095	0.0440699	0.0292213	0.0114184	0.0447251	0.0358109	0.047234	0.0591571	0.0358487	0.0235218	0.0262352	0.0292213	0.0188615	0.0104385	0.0746826	0.0383989	0.0467987	0.0349702	0.0162027
Thermoanaerobacterium	0.00866382	0.0632683	0.00477535	0.023108	0.00787443	0.0166698	0.00658705	0.105473	0.00268978	0.0048689	0.00964732	0.0151325	0.0939774	0.106486	0.00604664	0.0714511	0.00658705	0.00848315	0.0312105	0.0378775	0.00791456	0.00791456	0.00964028	0.00471311	0.00604506	0.0184162	0.0185686	0.0113362	0.020399	0.0896218	0.00268821	0.00787057	0.00471311	0.00486748	0.00848127	0.115052	0.0151268	0.105076	0.0254692	0.0364249
Phenylobacterium	0.0129957	0.00602555	0.00238767	0.0214575	0.00787443	0.0185219	0.00922187	0.127631	0.0847281	0.107116	0.0234292	0.0186246	0.0134253	0.0163824	0.0201555	0.0105075	0.00922187	0.0443734	0.0307822	0.0367529	0.0110804	0.0110804	0.0234121	0.0103688	0.0201502	0.011839	0.015916	0.0094468	0.0101995	0	0.0846786	0.00787057	0.0103688	0.107085	0.0443635	0.018166	0.0186176	0.127151	0.0300997	0.0369462
Pseudoxanthomonas	0.116962	0.0225958	0.00477535	0.0330115	0.0297478	0.0685312	0.0243721	0.0345668	0.0309325	0.0237359	0.0192946	0.0186246	0.0214805	0.0245736	0.00940588	0.029421	0.0243721	0.0169663	0.0307427	0.0252073	0.0295477	0.0295477	0.0192806	0.0131967	0.00940342	0.0447251	0.0504006	0.0358978	0.0305985	0	0.0309144	0.0297333	0.0131967	0.023729	0.0169625	0.0201845	0.0186176	0.0344368	0.0250207	0.0125602
Kushneria	0.0129957	0.0436852	0.00179076	0.0181563	0.0349975	0.0166698	0.00395223	0.0682473	0	0.00365168	0.00275638	0.00232807	0.0510163	0.0999328	0.00671849	0.178628	0.00395223	0.00326275	0.0307078	0.0461503	0.00263819	0.00263819	0.0082631	0.0084836	0.00335836	0.0131544	0.00795798	0.00755744	0.0122394	0	0.00470436	0.00699606	0.0084836	0.00121687	0.00260962	0.0242214	0.0011636	0.0176599	0.00740812	0.00628786
Pseudarthrobacter	0.0129957	0.0421788	0	0.0379632	0.0376223	0.0277829	0.028983	0.0664746	0.0356396	0.010955	0.0192946	0.0151325	0.0456462	0.0638915	0.00806219	0.0567406	0.028983	0.0137035	0.0306694	0.0193631	0.0142462	0.0142462	0.0192806	0.0169672	0.00806007	0.0328861	0.0225476	0.0377872	0.020399	0.0448109	0.0356188	0.0376038	0.0169672	0.0109518	0.0137005	0.0726642	0.0151268	0.0662246	0.0277827	0.0185527
Lachnoclostridium	0.00649787	0.0602555	0.00238767	0.0181563	0.00524962	0.0129654	0.00526964	0.0771106	0.00268978	0.00243445	0.00413457	0.0104763	0.144994	0.0933799	0.00470294	0.0882631	0.00526964	0.00587295	0.0305617	0.0427876	0.0875879	0.0875879	0.0482014	0.0273361	0.0900042	0.1618	0.110085	0.23617	0.161152	1.0665	0.0147851	0.0839528	0.0273361	0.0444158	0.10047	1.31603	0.143123	0.943038	0.263865	0.397976
Geobacillus	0.0129957	0.0482044	0.00298459	0.0181563	0.00787443	0.0166698	0.00922187	0.0655883	0.00336223	0.00730336	0.0124037	0.00931229	0.0966625	0.108124	0.00470294	0.107177	0.00922187	0.0091357	0.0305056	0.0374357	0.00685929	0.00685929	0.0123946	0.00659836	0.00470171	0.0171008	0.0172423	0.0283404	0.0326384	0.0627353	0.00336026	0.00787057	0.00659836	0.00730122	0.00913367	0.106978	0.00930882	0.0653416	0.0228535	0.0280337
Eggerthella	0.0129957	0.0768257	0.00477535	0.0330115	0.000874937	0.0240785	0.00395223	0.0797696	0.00134489	0.00365168	0.00137819	0.00582018	0.112773	0.0835504	0.00403109	0.0840601	0.00395223	0.0052204	0.0301148	0.0381123	0.00474874	0.00474874	0.00137718	0.00565574	0.00403004	0.0184162	0.0212213	0.0396765	0.040798	0.0896218	0.0013441	0.000874508	0.00565574	0.00365061	0.00521924	0.098904	0.00581801	0.0794695	0.0239572	0.0325674
Cellvibrio	0.0866382	0.0482044	0.00119384	0.0214575	0.0262481	0.0500093	0.0210786	0.0274762	0.0262254	0.0115636	0.050993	0.0162965	0.037591	0.0409561	0.00806219	0.0357255	0.0210786	0.00456785	0.0297425	0.0207818	0.0163568	0.0163568	0.0509558	0.0254508	0.00806007	0.0184162	0.0464216	0.0094468	0.0122394	0.0358487	0.02621	0.0262352	0.0254508	0.0115603	0.00456684	0.0343136	0.0162904	0.0273728	0.0228641	0.012885
Sulfitobacter	0.0151617	0.0406725	0.00119384	0.0297103	0.0183737	0.0240785	0.0250308	0.0629293	0.0201734	0.0127809	0.0179165	0.0162965	0.0671267	0.0753592	0.00739034	0.0651466	0.0250308	0.0091357	0.0296393	0.0227649	0.0121357	0.0121357	0.0179034	0.0197951	0.0073884	0.0249934	0.0318319	0.0302297	0.0122394	0.0537731	0.0201616	0.0183647	0.0197951	0.0127771	0.00913367	0.0726642	0.0162904	0.0626926	0.0252392	0.0188593
Mogibacterium	0.00649787	0.0723066	0.00119384	0.0247586	0.00437468	0.0166698	0.00329353	0.0815422	0	0.00121723	0.00689094	0.00931229	0.102033	0.101571	0.0013437	0.0861616	0.00329353	0.00326275	0.0292068	0.038955	0.00211055	0.00211055	0.00688591	0.000942623	0.00134335	0.00657722	0.00928431	0.026451	0.0183591	0.134433	0	0.00437254	0.000942623	0.00121687	0.00326203	0.121107	0.00930882	0.0812355	0.0238857	0.0422964
Aquimarina	0.0259915	0.0527235	0.00179076	0.0330115	0.00524962	0.0296351	0.00922187	0.0638156	0.012104	0.0091292	0.0316983	0.00931229	0.0859222	0.0704445	0.0120933	0.0525376	0.00922187	0.0117459	0.0292027	0.0255032	0.00580401	0.00580401	0.0316752	0.00471311	0.0120901	0.0289398	0.019895	0.0245617	0.0285586	0.098584	0.0120969	0.00524705	0.00471311	0.00912653	0.0117433	0.0888117	0.00930882	0.0635756	0.0258471	0.0287157
Diaphorobacter	0.00649787	0	0.00537227	0.00825287	0.0918683	0.00740878	0.0619183	0.00709063	0.0948148	0.0395599	0.0234292	0.0570378	0.00537014	0.00163824	0.0322487	0	0.0619183	0.0208816	0.0291838	0.0315166	0.0474874	0.0474874	0.0234121	0.0772951	0.0322403	0.0144699	0.019895	0.0188936	0.0122394	0	0.0947593	0.0918233	0.0772951	0.0395483	0.020877	0.00201845	0.0570165	0.00706396	0.0379901	0.0305786
Azotobacter	0.0281574	0.0331405	0.0155199	0.0264092	0.0682451	0.0277829	0.0296417	0.0239309	0.0208458	0.0340823	0.0799349	0.00814825	0.0134253	0.0212972	0.022171	0.012609	0.0296417	0.0267545	0.0289854	0.0180166	0.0110804	0.0110804	0.0798766	0.0226229	0.0221652	0.0249934	0.00928431	0.0321191	0.0183591	0.0179244	0.0208336	0.0682116	0.0226229	0.0340724	0.0267486	0.0141291	0.00814522	0.0238408	0.0260061	0.019044
Cellulophaga	0.0303234	0.0451916	0.00417843	0.0165057	0.00262481	0.0222263	0.0164676	0.0611567	0.012104	0.0158239	0.0248074	0.0104763	0.0644416	0.0966563	0.00806219	0.0588421	0.0164676	0.0150086	0.0289647	0.0257862	0.0121357	0.0121357	0.0247893	0.00754098	0.00806007	0.0263089	0.0172423	0.0170042	0.0122394	0.0716974	0.0120969	0.00262352	0.00754098	0.0158193	0.0150053	0.0928486	0.0104724	0.0609266	0.0236938	0.0249974
Mahella	0.0108298	0.0572427	0.000596919	0.0396138	0.0104992	0.0277829	0.0191024	0.0833149	0.0134489	0.0164326	0.0124037	0.00814825	0.077867	0.0491473	0.0147807	0.0483346	0.0191024	0.00717805	0.028657	0.0248418	0.00211055	0.00211055	0.00137718	0.000942623	0.00134335	0.00131544	0.00530532	0	0.0081596	0.0268865	0.000672052	0.00174902	0.000942623	0	0.00195722	0.0383505	0	0.0300218	0.00684691	0.0118055
Colwellia	0.0519829	0.0617619	0.000596919	0.023108	0.00874937	0.0351917	0.00790446	0.0584977	0.00874179	0.00669474	0.0661531	0.00698422	0.0537014	0.0589768	0.00335924	0.0483346	0.00790446	0.0065255	0.0286205	0.0248135	0.0126633	0.0126633	0.0661048	0.00659836	0.00335836	0.0302552	0.0318319	0.0302297	0.0469177	0.0627353	0.00873668	0.00874508	0.00659836	0.00669279	0.00652405	0.0867933	0.00698162	0.0582776	0.0273726	0.026009
Shigella	0.00216596	0.147626	0.000596919	0	0	0.00185219	0	0.0611567	0.000672445	0.00426029	0.00137819	0.00116404	0.0537014	0.0999328	0	0.138699	0	0.00065255	0.0285477	0.0502948	0.00369346	0.00369346	0.00137718	0	0	0.00131544	0.00265266	0.00377872	0.0040798	0.0448109	0.000672052	0	0	0.00425905	0.000652405	0.00807379	0.0011636	0.0609266	0.00784162	0.0167467
Runella	0.0194936	0.0708002	0.00238767	0.0280598	0.00174987	0.0240785	0.0138328	0.064702	0.0073969	0.00730336	0.022051	0.00698422	0.0751819	0.0786357	0.00537479	0.0651466	0.0138328	0.0052204	0.0284573	0.0282218	0.00474874	0.00474874	0.0220349	0.0113115	0.00537338	0.0197316	0.0278529	0.0283404	0.0183591	0.0537731	0.00739257	0.00174902	0.0113115	0.00730122	0.00521924	0.111015	0.00698162	0.0644586	0.0228724	0.0279304
Sphaerochaeta	0.0108298	0.066281	0.00119384	0.0264092	0.00174987	0.0203741	0.00263482	0.0629293	0.00336223	0.00365168	0.0358329	0.0116404	0.110088	0.0819122	0.00604664	0.0588421	0.00263482	0.00456785	0.0283878	0.0333332	0.00580401	0.00580401	0.0358068	0	0.00604506	0.0276243	0.0384636	0.0491233	0.0367182	0.0537731	0.00336026	0.00174902	0	0.00365061	0.00456684	0.106978	0.011636	0.0626926	0.0252109	0.0291037
Advenella	0.00649787	0.0165703	0.00656611	0.00990344	0.0629954	0.00926097	0.0777272	0.0168402	0.0537956	0.0237359	0.0206728	0.032593	0.0214805	0.0212972	0.0181399	0.0147105	0.0777272	0.0195765	0.0283384	0.0232814	0.0290201	0.0290201	0.0206577	0.084836	0.0181352	0.0184162	0.0225476	0.020783	0.0081596	0.0268865	0.0537642	0.0629646	0.084836	0.023729	0.0195722	0.0161476	0.0325809	0.0167769	0.032713	0.0230673
Oceanobacillus	0.00866382	0.0542299	0.00358151	0.0198069	0.00262481	0.0148176	0.00263482	0.0709063	0	0.00791197	0.0165383	0.00931229	0.0993475	0.0851886	0.00470294	0.100872	0.00263482	0.0026102	0.0281325	0.0361348	0.00791456	0.00791456	0.0165262	0.00471311	0.00470171	0.0171008	0.0145896	0.0302297	0.0142793	0.0806596	0	0.00262352	0.00471311	0.00790966	0.00260962	0.102941	0.00930882	0.0706396	0.0221875	0.0301784
Lactobacillus	0.0259915	0.0436852	0.00179076	0.0280598	0.00524962	0.0277829	0.0164676	0.0469754	0.012104	0.0115636	0.0372111	0.00931229	0.0832371	0.0524238	0.00403109	0.0672481	0.0164676	0.0091357	0.0277076	0.0232056	0.194171	0.194171	0.0743679	0.0546721	0.0450021	0.202578	0.151202	0.270178	0.21419	1.08442	0.0174734	0.056843	0.0546721	0.0450242	0.0502352	1.05767	0.0651617	0.750545	0.254588	0.340875
Frankia	0.0216596	0.0406725	0.00537227	0.0495172	0.0157489	0.0370439	0.0125154	0.062043	0.0215182	0.0152153	0.0110255	0.0104763	0.0563864	0.054062	0.00739034	0.0441316	0.0125154	0.0143561	0.0273139	0.0190888	0.00949748	0.00949748	0.0110175	0.0160246	0.0073884	0.0407787	0.0371372	0.0491233	0.0673167	0.0179244	0.0215057	0.0157411	0.0160246	0.0152109	0.0143529	0.0484428	0.0104724	0.0618096	0.0260703	0.019355
Formosa	0.0346553	0.0482044	0.00238767	0.00990344	0.00699949	0.0203741	0.0164676	0.0664746	0.00874179	0.0158239	0.0344547	0.0116404	0.077867	0.0524238	0.00470294	0.0525376	0.0164676	0.0104408	0.0272537	0.0230553	0.0110804	0.0110804	0.0344296	0.0084836	0.00470171	0.0289398	0.0238739	0.0113362	0.0265187	0.0627353	0.00873668	0.00699606	0.0084836	0.0158193	0.0104385	0.0968855	0.011636	0.0662246	0.0249111	0.0254306
Aquabacterium	0.0259915	0.00602555	0.00596919	0.0148552	0.0656202	0.0203741	0.0461094	0.0062043	0.0652272	0.0237359	0.0675313	0.032593	0.00537014	0.0131059	0.0154525	0.0105075	0.0461094	0.0189239	0.0272059	0.0217008	0.0327135	0.0327135	0.067482	0.0556147	0.0154485	0.0171008	0.0358109	0.0283404	0.0122394	0	0.065189	0.0655881	0.0556147	0.023729	0.0189197	0.0161476	0.0325809	0.00618096	0.0323008	0.0212816
Brachybacterium	0.0194936	0.0421788	0.00596919	0.034662	0.0201235	0.0277829	0.0184437	0.0584977	0.0201734	0.0170412	0.0137819	0.00931229	0.0590715	0.0557003	0.00470294	0.0546391	0.0184437	0.0078306	0.0271027	0.0189242	0.00633165	0.00633165	0.0137718	0.015082	0.00470171	0.0368324	0.0331583	0.047234	0.0448778	0.0179244	0.0201616	0.0201137	0.015082	0.0170362	0.00782886	0.0504612	0.00930882	0.0582776	0.0235842	0.0170627
Acetobacterium	0.0108298	0.0572427	0.00238767	0.0214575	0.00612456	0.0166698	0.00395223	0.0682473	0.00268978	0.00426029	0.00826913	0.00814825	0.0751819	0.0950181	0.00806219	0.0861616	0.00395223	0.00848315	0.0270632	0.0326142	0.00633165	0.00633165	0.0082631	0.00377049	0.00806007	0.0105235	0.00663165	0.0170042	0.0081596	0.0896218	0.00268821	0.00612156	0.00377049	0.00425905	0.00848127	0.0908302	0.00814522	0.0679906	0.0198325	0.0294842
Pelobacter	0.0151617	0.0587491	0.00179076	0.0148552	0.0113742	0.0148176	0.00856317	0.0833149	0.00806934	0.0091292	0.00689094	0.00349211	0.0617566	0.0868269	0.0013437	0.0819586	0.00856317	0.00848315	0.0269522	0.0312659	0.00738693	0.00738693	0.00688591	0.00377049	0.00134335	0.035517	0.0185686	0.0377872	0.0326384	0.098584	0.00806462	0.0113686	0.00377049	0.00912653	0.00848127	0.106978	0.00349081	0.0830015	0.0268972	0.0340224
Faecalibaculum	0.00649787	0.0783321	0.00238767	0.0165057	0.00262481	0.0129654	0.00197612	0.0868602	0.00134489	0.00121723	0.00275638	0.00349211	0.0644416	0.103209	0.0026874	0.0840601	0.00197612	0.00065255	0.0263326	0.0372623	0.00369346	0.00369346	0.00275437	0	0.00268669	0.0092081	0.0132633	0.0170042	0.020399	0.0627353	0.0013441	0.00262352	0	0.00121687	0.000652405	0.0807379	0.00349081	0.0865335	0.0173354	0.0282467
Glutamicibacter	0.0671446	0.0436852	0.000596919	0.0907815	0.013124	0.0796444	0.0105393	0.0345668	0.0154662	0.00730336	0.00964732	0.00465614	0.0214805	0.0245736	0.00470294	0.029421	0.0105393	0.00587295	0.0263192	0.0271348	0.0195226	0.0195226	0.00964028	0.00188525	0.00470171	0.0776112	0.0557059	0.0642382	0.0346783	0.0268865	0.0154572	0.0131176	0.00188525	0.00730122	0.00587165	0.0544981	0.00465441	0.0344368	0.0250897	0.0235254
Haemophilus	0.0173276	0.0677874	0.00119384	0.0280598	0.0122491	0.0240785	0.0171263	0.0691336	0.00605201	0.00608613	0.0330765	0.00814825	0.0617566	0.0475091	0.00335924	0.0462331	0.0171263	0.0039153	0.0261233	0.022965	0.0232161	0.0232161	0.0330524	0.00754098	0.00335836	0.0171008	0.0225476	0.0283404	0.0346783	0.098584	0.00604847	0.0122431	0.00754098	0.00608435	0.00391443	0.0968855	0.00814522	0.0688736	0.0278539	0.0299914
Leptospirillum	0.0108298	0.0542299	0.00179076	0.0396138	0.00262481	0.0277829	0.00724576	0.0744516	0.00201734	0.00365168	0.0179165	0.00349211	0.077867	0.0638915	0.0026874	0.0672481	0.00724576	0.0052204	0.0261004	0.0285411	0	0	0.00413155	0	0	0.00789266	0	0.00377872	0	0.0179244	0	0.00262352	0	0	0.00195722	0.018166	0.0011636	0.00971294	0.0037417	0.00593758
Pseudoclostridium	0.00433191	0.0692938	0.00477535	0.00330115	0.00437468	0.00370439	0.00197612	0.0806559	0.000672445	0.00426029	0.00689094	0.00465614	0.0966625	0.0901034	0.00201555	0.0840601	0.00197612	0.0052204	0.0260517	0.037441	0.0042211	0.0042211	0.00688591	0.00188525	0.00201502	0.011839	0.00928431	0.00566808	0.0122394	0.0716974	0.000672052	0.00437254	0.00188525	0.00425905	0.00521924	0.0827564	0.00465441	0.0803525	0.0174516	0.0282351
Veillonella	0.00649787	0.0798385	0.00119384	0.0165057	0.00262481	0.0129654	0.00329353	0.0762242	0.00201734	0.00304307	0.00275638	0	0.0993475	0.0884651	0.00403109	0.0588421	0.00329353	0.00456785	0.0258615	0.0358713	0.00527638	0.00527638	0.00275437	0.00282787	0.00403004	0.00789266	0.00928431	0.0151149	0.020399	0.0627353	0.00201616	0.00262352	0.00282787	0.00304218	0.00456684	0.0645904	0	0.0759375	0.0161775	0.024366
Acetobacter	0.00866382	0.0436852	0.000596919	0.0247586	0.0104992	0.0185219	0.017785	0.064702	0.00806934	0.00547752	0.0124037	0.0151325	0.077867	0.0737209	0.00671849	0.0504361	0.017785	0.0065255	0.0257416	0.0249107	0.0084422	0.0084422	0.0123946	0.0122541	0.00671673	0.0210471	0.0185686	0.020783	0.0305985	0.0448109	0.00806462	0.0104941	0.0122541	0.00547592	0.00652405	0.0867933	0.0151268	0.0644586	0.0218472	0.0222006
Sulfurospirillum	0.00649787	0.0436852	0.00298459	0.0247586	0.00349975	0.0166698	0.00790446	0.0505207	0.00336223	0.00243445	0.111633	0.0116404	0.0483312	0.0720827	0.0026874	0.0420301	0.00790446	0.00456785	0.0257331	0.0302555	0.00263819	0.00263819	0.111552	0.00565574	0.00268669	0.0197316	0.0132633	0.0226723	0.0183591	0.0448109	0.00336026	0.00349803	0.00565574	0.00243374	0.00456684	0.0726642	0.011636	0.0503307	0.0221196	0.0298479
Pusillimonas	0.00216596	0.019583	0.00477535	0.00495172	0.0489964	0.00370439	0.0474268	0.0301352	0.0490885	0.0365168	0.0358329	0.0349211	0.0214805	0.0180207	0.0107496	0.0231165	0.0474268	0.0221867	0.0256155	0.0164867	0.0147739	0.0147739	0.0358068	0.0527869	0.0107468	0.00789266	0.0172423	0.0094468	0.0122394	0.0268865	0.0490598	0.0489725	0.0527869	0.0365061	0.0221818	0.018166	0.0349081	0.0300218	0.027511	0.0156899
Peptoniphilus	0.00433191	0.0557363	0.00238767	0.0214575	0.00787443	0.0148176	0.00461094	0.0549524	0.00134489	0.00304307	0.00826913	0.00814825	0.0805521	0.0950181	0.0013437	0.0882631	0.00461094	0.00195765	0.0254844	0.0331698	0.00211055	0.00211055	0.0082631	0.000942623	0.00134335	0.0157853	0.00795798	0.020783	0.0163192	0.0448109	0.0013441	0.00787057	0.000942623	0.00304218	0.00195722	0.0928486	0.00814522	0.0547457	0.0161846	0.0244297
Paeniclostridium	0.00216596	0.0331405	0.00417843	0.0214575	0.0113742	0.0129654	0.00658705	0.0717926	0.00268978	0.00243445	0.00826913	0.0151325	0.102033	0.0769974	0.00873404	0.0651466	0.00658705	0.00587295	0.0254199	0.0311475	0.0084422	0.0084422	0.0082631	0.000942623	0.00873175	0.0197316	0.00663165	0.00755744	0.0081596	0.134433	0.00268821	0.0113686	0.000942623	0.00243374	0.00587165	0.0787195	0.0151268	0.0715225	0.0222227	0.0357661
Aerococcus	0.0129957	0.0692938	0.00119384	0.0198069	0.00349975	0.0166698	0.00329353	0.0602703	0.00201734	0.00608613	0.0179165	0.00116404	0.0939774	0.0737209	0.000671849	0.0672481	0.00329353	0.0039153	0.0253908	0.0315037	0.0100251	0.0100251	0.0179034	0.00565574	0.000671673	0.0249934	0.00663165	0.0340085	0.0142793	0.0716974	0.00201616	0.00349803	0.00565574	0.00608435	0.00391443	0.098904	0.0011636	0.0600436	0.020954	0.0279807
Algoriphagus	0.0173276	0.0542299	0.00179076	0.023108	0.00349975	0.0203741	0.00658705	0.0611567	0.00874179	0.0103464	0.0427239	0.00232807	0.0939774	0.0524238	0.00671849	0.033624	0.00658705	0.0091357	0.02526	0.0258966	0.0042211	0.0042211	0.0426927	0.00377049	0.00671673	0.0184162	0.0132633	0.0151149	0.0061197	0.0448109	0.00873668	0.00349803	0.00377049	0.0103434	0.00913367	0.0645904	0.00232721	0.0609266	0.0179263	0.0204434
Alkaliphilus	0.00216596	0.0557363	0.00238767	0.0165057	0.0122491	0.0111132	0.00263482	0.0602703	0.00470712	0.0103464	0.0124037	0.0151325	0.077867	0.0737209	0.00806219	0.0756541	0.00263482	0.0104408	0.025224	0.0284547	0.00316583	0.00316583	0.0123946	0.00659836	0.00806007	0.0105235	0.00928431	0.0170042	0.0061197	0.0716974	0.00470436	0.0122431	0.00659836	0.0103434	0.0104385	0.100922	0.0151268	0.0600436	0.0204686	0.0274995
Cedecea	0.00866382	0.0316341	0.00596919	0.0511678	0.0376223	0.0333395	0.0210786	0.0230445	0.0161387	0.00973781	0.022051	0.0232807	0.0456462	0.0475091	0.0127651	0.033624	0.0210786	0.0091357	0.0251937	0.0140427	0.017412	0.017412	0.0220349	0.0320492	0.0127618	0.023678	0.0450952	0.0340085	0.0509975	0.0268865	0.0161292	0.0376038	0.0320492	0.00973497	0.00913367	0.0322952	0.0232721	0.0229579	0.0258618	0.0116532
Thermoanaerobacter	0.00216596	0.0587491	0.00477535	0.0280598	0.00699949	0.0166698	0.00461094	0.0762242	0.000672445	0.00365168	0.00275638	0.00698422	0.0912923	0.0622532	0.00537479	0.0735526	0.00461094	0.00195765	0.0250756	0.0314832	0.0110804	0.0110804	0.00275437	0.00377049	0.00537338	0.0184162	0.0132633	0.020783	0.0081596	0.116508	0.000672052	0.00699606	0.00377049	0.00365061	0.00195722	0.108996	0.00698162	0.0759375	0.0233417	0.0366647
Phascolarctobacterium	0.0129957	0.0557363	0.00238767	0.0198069	0.00174987	0.0166698	0.00197612	0.0664746	0	0.000608613	0.00275638	0.00349211	0.115458	0.0688062	0.000671849	0.0756541	0.00197612	0	0.0248456	0.0352125	0.00316583	0.00316583	0.00275437	0.00188525	0.000671673	0.0223625	0.00928431	0.020783	0.0326384	0.0716974	0	0.00174902	0.00188525	0.000608435	0	0.108996	0.00349081	0.0662246	0.0195202	0.0313256
Dokdonia	0.0108298	0.0512172	0.00119384	0.0198069	0.00787443	0.0166698	0.0131741	0.0682473	0.0073969	0.00791197	0.0165383	0.00698422	0.0644416	0.0753592	0.00201555	0.0525376	0.0131741	0.0117459	0.0248399	0.024907	0.0042211	0.0042211	0.0165262	0.00942623	0.00201502	0.0276243	0.015916	0.0340085	0.0326384	0.0627353	0.00739257	0.00787057	0.00942623	0.00790966	0.0117433	0.0746826	0.00698162	0.0679906	0.0224072	0.0232544
Edwardsiella	0.0173276	0.0512172	0.00417843	0.0198069	0.0209985	0.0185219	0.0158089	0.0434301	0.0134489	0.00852058	0.0179165	0.0139684	0.0537014	0.067168	0.00537479	0.0504361	0.0158089	0.0065255	0.0246755	0.0192868	0.0100251	0.0100251	0.0179034	0.0131967	0.00537338	0.0184162	0.0252003	0.0358978	0.0285586	0.0179244	0.013441	0.0209882	0.0131967	0.00851809	0.00652405	0.0423874	0.0139632	0.0432667	0.0191559	0.0116147
Phaeobacter	0.00216596	0.0421788	0.000596919	0.0280598	0.0183737	0.0166698	0.0204199	0.0709063	0.0174836	0.0048689	0.0110255	0.0104763	0.040276	0.0638915	0.00739034	0.0546391	0.0204199	0.0117459	0.0245327	0.0212246	0.011608	0.011608	0.0110175	0.0188525	0.0073884	0.0171008	0.0265266	0.0226723	0.0285586	0.107546	0.0174734	0.0183647	0.0188525	0.00486748	0.0117433	0.0524797	0.0104724	0.0706396	0.0259873	0.0260655
Thermoclostridium	0	0.0587491	0.00179076	0.0148552	0.00174987	0.0166698	0.00263482	0.0584977	0	0	0.00275638	0.00465614	0.104718	0.0901034	0.0026874	0.0735526	0.00263482	0.0039153	0.0244428	0.0353006	0.00263819	0.00263819	0.00275437	0	0.00268669	0.0171008	0.00397899	0.0170042	0.0040798	0.107546	0	0.00174902	0	0	0.00391443	0.0968855	0.00465441	0.0582776	0.018106	0.0335464
Pseudodesulfovibrio	0.00866382	0.0647746	0.00298459	0.0264092	0.00174987	0.0185219	0.00131741	0.0584977	0.00201734	0.00304307	0.00413457	0.00232807	0.0939774	0.0901034	0	0.0504361	0.00131741	0.0065255	0.0242668	0.0322869	0.0042211	0.0042211	0.00413155	0.00282787	0	0.0210471	0.0291793	0.0377872	0.0326384	0.0806596	0.00201616	0.00174902	0.00282787	0.00304218	0.00652405	0.0847748	0.00232721	0.0582776	0.021014	0.0277182
Alkalitalea	0.00866382	0.0708002	0.00179076	0.0181563	0.00174987	0.0148176	0.00856317	0.0584977	0.00201734	0.00852058	0.0124037	0.00116404	0.0859222	0.060615	0.00671849	0.0609436	0.00856317	0.00326275	0.024065	0.0285391	0.00263819	0.00263819	0.0123946	0.00282787	0.00671673	0.0144699	0.00663165	0.0170042	0.0265187	0.0179244	0.00201616	0.00174902	0.00282787	0.00851809	0.00326203	0.0423874	0.0011636	0.0582776	0.0127759	0.0156098
Klebsiella	0.0173276	0.0316341	0.00119384	0.0511678	0.00699949	0.0370439	0.00658705	0.0522934	0.00941423	0.0091292	0.0165383	0.00582018	0.0671267	0.0475091	0.00470294	0.0483346	0.00658705	0.0137035	0.0240618	0.0210465	0.0601507	0.0601507	0.09778	0.0612705	0.0322403	1.05367	0.681734	2.48262	2.16637	0.152357	0.051076	0.055094	0.0612705	0.0438073	0.0528448	0.171568	0.0500349	0.2596	0.421869	0.743057
Adlercreutzia	0.00866382	0.0692938	0.00179076	0.0313609	0.000874937	0.0222263	0.00197612	0.0726789	0.000672445	0.000608613	0	0.00232807	0.0805521	0.0573385	0.00201555	0.0735526	0.00197612	0.0039153	0.0239903	0.0311548	0.00158291	0.00158291	0	0	0.00201502	0.023678	0.00928431	0.0396765	0.0285586	0.0358487	0.000672052	0.000874508	0	0.000608435	0.00391443	0.0827564	0.00232721	0.0724055	0.0169881	0.0257244
Leucobacter	0.00866382	0.0482044	0.00179076	0.0363126	0.00524962	0.0240785	0.00724576	0.0638156	0	0.00304307	0.0151601	0.00814825	0.0537014	0.0917416	0.00671849	0.0420301	0.00724576	0.0065255	0.0238709	0.026244	0.00527638	0.00527638	0.00688591	0	0	0.0092081	0.00928431	0.0113362	0.0040798	0.00896218	0.00672052	0.00874508	0	0.00304218	0.00195722	0.0161476	0.00581801	0.0114789	0.00634549	0.0044449
Sphingorhabdus	0.0108298	0.027115	0.00358151	0.0198069	0.00349975	0.0166698	0.00131741	0.0496344	0.00672445	0.0200842	0.139197	0.00232807	0.040276	0.0344031	0.00470294	0.0357255	0.00131741	0.0104408	0.0237586	0.0324467	0.00263819	0.00263819	0.139095	0.00754098	0.00470171	0.00657722	0.0145896	0.020783	0.0061197	0.0179244	0.00672052	0.00349803	0.00754098	0.0200784	0.0104385	0.0282583	0.00232721	0.0494477	0.0194954	0.032104
Flavisolibacter	0.00649787	0.0617619	0.00179076	0.0313609	0.00262481	0.0203741	0.00856317	0.0522934	0.0107591	0.00730336	0.0151601	0.00465614	0.0698118	0.0655297	0.0013437	0.0483346	0.00856317	0.0091357	0.0236591	0.0243517	0.00263819	0.00263819	0.015149	0.00942623	0.00134335	0.0302552	0.0172423	0.0377872	0.0387581	0.0716974	0.0107528	0.00262352	0.00942623	0.00730122	0.00913367	0.0787195	0.00465441	0.0520967	0.0223135	0.0241756
Pseudonocardia	0.00866382	0.0451916	0.00537227	0.0330115	0.0096243	0.0222263	0.00790446	0.0549524	0.00806934	0.0127809	0.0151601	0.00698422	0.0349059	0.0524238	0.0100777	0.0588421	0.00790446	0.0313224	0.0236343	0.0186794	0.00633165	0.00633165	0.015149	0.00942623	0.0100751	0.0539332	0.0331583	0.0340085	0.0469177	0.0179244	0.00806462	0.00961959	0.00942623	0.0127771	0.0313154	0.040369	0.00698162	0.0547457	0.0225864	0.0172706
Kordia	0.00866382	0.0361533	0.00417843	0.0264092	0.0096243	0.0185219	0.0184437	0.051407	0.0154662	0.0115636	0.0124037	0.0116404	0.0590715	0.0557003	0.00403109	0.0546391	0.0184437	0.0078306	0.0235662	0.0190608	0.00263819	0.00263819	0.0179034	0.00565574	0.00335836	0.00657722	0.00530532	0.0094468	0.0101995	0	0.00873668	0.00174902	0.00565574	0.00486748	0.00521924	0.0423874	0	0.0273728	0.00887284	0.0106649
Dysosmobacter	0.00433191	0.0617619	0	0.0132046	0.00262481	0.00926097	0.00197612	0.0744516	0	0	0	0.00349211	0.0671267	0.0753592	0.000671849	0.102974	0.00197612	0	0.0232895	0.0348856	0.00316583	0.00316583	0	0	0.000671673	0.0092081	0.00397899	0.0094468	0.0081596	0.0358487	0	0.00262352	0	0	0	0.0524797	0.00349081	0.0741715	0.0114673	0.0209617
Thioalkalivibrio	0.0173276	0.0482044	0.00238767	0.0264092	0.013999	0.0222263	0.0296417	0.0389984	0.0147938	0.0133895	0.0137819	0.0116404	0.0537014	0.0376796	0.00403109	0.0273195	0.0296417	0.0104408	0.0230897	0.0145472	0.0121357	0.0121357	0.0137718	0.0273361	0.00403004	0.0184162	0.0212213	0.0415659	0.0367182	0.00896218	0.0147851	0.0139921	0.0273361	0.0133856	0.0104385	0.0423874	0.011636	0.0388518	0.0205059	0.0121655
Fibrella	0.0151617	0.0421788	0.00358151	0.0478666	0.00262481	0.0333395	0.00658705	0.0469754	0.00268978	0.00973781	0.0151601	0.0116404	0.0671267	0.0688062	0.00470294	0.025218	0.00658705	0.0052204	0.0230669	0.0224137	0.00527638	0.00527638	0.015149	0.00942623	0.00470171	0.0381479	0.0437689	0.0396765	0.0550773	0.0627353	0.00268821	0.00262352	0.00942623	0.00973497	0.00521924	0.0605535	0.011636	0.0467987	0.0237731	0.022169
Pigmentiphaga	0.0151617	0.00753194	0.0095507	0.00990344	0.0437468	0.0129654	0.0316178	0.0159539	0.0511058	0.037734	0.0192946	0.0372492	0.00268507	0.0131059	0.0141088	0.0147105	0.0316178	0.0443734	0.0229121	0.0147952	0.0311306	0.0311306	0.0192806	0.0386475	0.0141051	0.0105235	0.011937	0.0151149	0.0061197	0	0.051076	0.0437254	0.0386475	0.037723	0.0443635	0.0161476	0.0372353	0.0158939	0.0257112	0.0152002
Anoxybacillus	0.0173276	0.0512172	0.00179076	0.00990344	0.00612456	0.0129654	0.00592835	0.0505207	0.000672445	0.00182584	0.0110255	0.00349211	0.0617566	0.0704445	0.0026874	0.0945676	0.00592835	0.0039153	0.0228941	0.0290009	0.00527638	0.00527638	0.0110175	0.00471311	0.00268669	0.0131544	0.00663165	0.0113362	0.0101995	0.0716974	0.000672052	0.00612156	0.00471311	0.00182531	0.00391443	0.076701	0.00349081	0.0503307	0.0160977	0.0238122
Tumebacillus	0.00216596	0.0768257	0.000596919	0.0165057	0.00262481	0.0111132	0	0.0797696	0.00134489	0.00121723	0.00413457	0	0.0617566	0.0819122	0.00201555	0.0693496	0	0	0.0228518	0.0331049	0.00263819	0.00263819	0.00413155	0.00188525	0.00201502	0.0144699	0.00265266	0.020783	0.0122394	0.0627353	0.0013441	0.00262352	0.00188525	0.00121687	0	0.058535	0	0.0794695	0.0150701	0.0247814
Dyadobacter	0.0108298	0.0451916	0.000596919	0.0247586	0.00174987	0.0185219	0.0237134	0.054066	0.0168111	0.0200842	0.0192946	0.00465614	0.0456462	0.0442326	0.00806219	0.0399285	0.0237134	0.0091357	0.0228329	0.0165306	0.00316583	0.00316583	0.0192806	0.0480738	0.00806007	0.0184162	0.0106106	0.020783	0.020399	0.0358487	0.0168013	0.00174902	0.0480738	0.0200784	0.00913367	0.0484428	0.00465441	0.0538627	0.0217	0.0175387
Vitreoscilla	0.0173276	0.00903832	0.00119384	0.00990344	0.0489964	0.0129654	0.0520377	0.0124086	0.0470712	0.0255617	0.0165383	0.0395772	0.0107403	0.0163824	0.00671849	0.025218	0.0520377	0.00717805	0.0228275	0.0172621	0.0205779	0.0205779	0.0165262	0.0593852	0.00671673	0.0289398	0.0278529	0.0226723	0.0101995	0	0.0470436	0.0489725	0.0593852	0.0255543	0.00717646	0.0141291	0.0395625	0.0123619	0.0259797	0.0180429
Aequorivita	0.0238255	0.0241022	0.00179076	0.0198069	0.00262481	0.0222263	0.00790446	0.0416574	0.0100867	0.00791197	0.0385893	0.00582018	0.0644416	0.0589768	0.00739034	0.0441316	0.00790446	0.0156612	0.0224918	0.0193501	0.00211055	0.00211055	0.0385611	0.00659836	0.0073884	0.0184162	0.0106106	0.0188936	0.0163192	0.0537731	0.0100808	0.00262352	0.00659836	0.00790966	0.0156577	0.0383505	0.00581801	0.0415007	0.0168512	0.0155978
Weissella	0.00866382	0.0451916	0.000596919	0.0165057	0.00349975	0.0129654	0.00724576	0.054066	0.00201734	0.0048689	0.00413457	0.00232807	0.0859222	0.0802739	0.00403109	0.0609436	0.00724576	0.00326275	0.0224313	0.0288602	0.00369346	0.00369346	0.00413155	0.00282787	0.00403004	0.0171008	0.0145896	0.0245617	0.0285586	0.0627353	0.00201616	0.00349803	0.00282787	0.00486748	0.00326203	0.0827564	0.00232721	0.0538627	0.0178522	0.0242605
Chlorobium	0.00433191	0.0708002	0.000596919	0.0379632	0.00262481	0.0240785	0.00329353	0.0558387	0.00134489	0.00365168	0.00551276	0.00814825	0.0563864	0.0688062	0.0013437	0.0504361	0.00329353	0.0052204	0.0224262	0.0262846	0.00316583	0.00316583	0.00550873	0.000942623	0.00134335	0.0184162	0.0212213	0.0321191	0.020399	0.0537731	0.0013441	0.00262352	0.000942623	0.00365061	0.00521924	0.0787195	0.00814522	0.0556286	0.0175738	0.023048
Brevibacterium	0.0216596	0.0406725	0.00238767	0.0412643	0.013124	0.0333395	0.00526964	0.0434301	0.0073969	0.00730336	0.00275638	0.00582018	0.0590715	0.0507855	0.0013437	0.0546391	0.00526964	0.00717805	0.0223729	0.0207285	0.00791456	0.00791456	0.00275437	0.0084836	0.00134335	0.0263089	0.019895	0.0340085	0.0224389	0.0627353	0.00739257	0.0131176	0.0084836	0.00730122	0.00717646	0.0645904	0.00581801	0.0432667	0.0194969	0.019598
Rickettsia	0.00866382	0.0391661	0	0.0280598	0.00612456	0.0203741	0.000658705	0.0629293	0.00201734	0.00547752	0.00964732	0.0116404	0.0939774	0.0573385	0.00403109	0.0483346	0.000658705	0.00326275	0.0223534	0.0271824	0.00580401	0.00580401	0.00964028	0.00282787	0.00403004	0.0223625	0.0145896	0.0170042	0.0305985	0.0896218	0.00201616	0.00612156	0.00282787	0.00547592	0.00326203	0.0847748	0.011636	0.0626926	0.0211717	0.0281063
Prochlorococcus	0.0151617	0.0241022	0.00298459	0.0297103	0.00699949	0.0240785	0.00988058	0.0638156	0.00336223	0.00608613	0.00413457	0.00814825	0.0671267	0.0507855	0.0026874	0.0651466	0.00988058	0.00717805	0.0222927	0.0232294	0.00791456	0.00791456	0.00413155	0.000942623	0.00268669	0.0210471	0.00530532	0.0245617	0.0142793	0.0806596	0.00336026	0.00699606	0.000942623	0.00608435	0.00717646	0.0888117	0.00814522	0.0635756	0.0196964	0.0277563
Lysinibacillus	0.0303234	0.0316341	0.00119384	0.0165057	0.00262481	0.0222263	0.0125154	0.054066	0.00470712	0.00243445	0.0110255	0.0104763	0.0563864	0.0491473	0.00537479	0.0672481	0.0125154	0.0091357	0.0221967	0.0210767	0.0142462	0.0142462	0.0289208	0.00565574	0.0214935	0.228887	0.137938	0.0717956	0.148913	2.77828	0.025538	0.251858	0.00565574	0.0164278	0.0345775	1.00317	0.0127996	1.25474	0.336396	0.70414
Neorhizobium	0.0303234	0.0331405	0.000596919	0.0264092	0.00699949	0.0277829	0.00658705	0.0868602	0.0174836	0.0115636	0.00964732	0.00582018	0.0483312	0.0327649	0.00335924	0.033624	0.00658705	0.0110933	0.0221652	0.0210955	0.0042211	0.0042211	0.00964028	0.00942623	0.00335836	0.0342015	0.015916	0.0302297	0.020399	0.0358487	0.0174734	0.00699606	0.00942623	0.0115603	0.0110909	0.0363321	0.00581801	0.0865335	0.019594	0.0201434
Microbulbifer	0.0151617	0.0346469	0.00119384	0.0181563	0.0174987	0.0166698	0.00790446	0.0434301	0.0201734	0.0139981	0.0330765	0.0139684	0.0483312	0.0425943	0.00739034	0.0504361	0.00790446	0.00456785	0.0220612	0.0158254	0.00738693	0.00738693	0.0330524	0.0084836	0.0073884	0.0223625	0.00663165	0.026451	0.0142793	0.0358487	0.0201616	0.0174902	0.0084836	0.013994	0.00456684	0.0464243	0.0139632	0.0432667	0.0187568	0.0131763
Xenorhabdus	0.0151617	0.0436852	0.000596919	0.0214575	0.00787443	0.0185219	0.0151502	0.0505207	0.00806934	0.00730336	0.0496148	0.00582018	0.037591	0.0491473	0.00335924	0.037827	0.0151502	0.0065255	0.0218543	0.017733	0.0121357	0.0121357	0.0495786	0.0179098	0.00335836	0.011839	0.0238739	0.0245617	0.0326384	0.0358487	0.00806462	0.00787057	0.0179098	0.00730122	0.00652405	0.0544981	0.00581801	0.0503307	0.0212332	0.0166519
Erysipelothrix	0.00866382	0.0527235	0.00298459	0.0214575	0.00699949	0.0166698	0.00263482	0.0611567	0.00537956	0.0091292	0.0151601	0.00349211	0.0590715	0.0573385	0.00335924	0.0483346	0.00263482	0.0123984	0.0216438	0.0224991	0.00474874	0.00474874	0.015149	0.00471311	0.00335836	0.0131544	0.0132633	0.0094468	0.0101995	0.0627353	0.00537642	0.00699606	0.00471311	0.00912653	0.0123957	0.0787195	0.00349081	0.0609266	0.017959	0.0233119
Marinovum	0.00866382	0.0301277	0.00119384	0.0165057	0.00349975	0.0129654	0.00988058	0.0310215	0.00470712	0.00791197	0.0937168	0.00232807	0.0563864	0.054062	0.00403109	0.033624	0.00988058	0.0078306	0.0215743	0.0247336	0.00369346	0.00369346	0.00275437	0.000942623	0.00201502	0.00657722	0.00530532	0.0094468	0.0040798	0.0179244	0.00604847	0.00349803	0.000942623	0.00304218	0.000652405	0.0161476	0.00698162	0.00971294	0.00574768	0.00489277
Komagataeibacter	0.0194936	0.0406725	0.00179076	0.0247586	0.0201235	0.0222263	0.0144915	0.0584977	0.0188285	0.0158239	0.00964732	0.00465614	0.040276	0.0327649	0.00604664	0.0315225	0.0144915	0.0110933	0.0215114	0.0146141	0.00580401	0.00580401	0.0123946	0.0216803	0.00403004	0.0157853	0.0252003	0.026451	0.0367182	0.0358487	0.0154572	0.00961959	0.0216803	0.0115603	0.00782886	0.0504612	0.011636	0.0512137	0.0205097	0.0146607
Blattabacterium	0.0129957	0.0286214	0	0.0247586	0.00524962	0.0203741	0.00658705	0.0487481	0.00470712	0.00243445	0.0124037	0.00582018	0.0805521	0.0589768	0.00335924	0.0567406	0.00658705	0.0078306	0.0214859	0.0238526	0.00738693	0.00738693	0.0123946	0.00282787	0.00335836	0.0210471	0.0145896	0.0151149	0.0061197	0.116508	0.00470436	0.00524705	0.00282787	0.00243374	0.00782886	0.0888117	0.00581801	0.0485647	0.0207206	0.0320428
Prosthecochloris	0.00433191	0.0406725	0.00119384	0.0297103	0.00262481	0.0185219	0.00263482	0.064702	0.000672445	0.00182584	0.00689094	0.00116404	0.0751819	0.060615	0.00335924	0.0630451	0.00263482	0.00195765	0.0212077	0.0269863	0.00316583	0.00316583	0.00688591	0.00188525	0.00335836	0.0171008	0.0172423	0.0226723	0.0346783	0.0537731	0.000672052	0.00262352	0.00188525	0.00182531	0.00195722	0.0807379	0.0011636	0.0644586	0.0177362	0.0246276
Actinoalloteichus	0.0108298	0.0316341	0.00179076	0.0363126	0.00787443	0.0259307	0.00197612	0.0522934	0.0100867	0.00852058	0.00551276	0.00582018	0.0617566	0.0638915	0.00403109	0.0462331	0.00197612	0.0052204	0.021205	0.02188	0.0042211	0.0042211	0.00550873	0.00188525	0.00403004	0.0223625	0.0517269	0.047234	0.0509975	0.0268865	0.0100808	0.00787057	0.00188525	0.00851809	0.00521924	0.0302767	0.00581801	0.0520967	0.0189355	0.0192411
Laceyella	0.00866382	0.0376597	0.00238767	0.0214575	0.00612456	0.0166698	0.0144915	0.0806559	0.0127765	0.0091292	0.0137819	0.00582018	0.0349059	0.0507855	0.00537479	0.033624	0.0144915	0.00717805	0.0208877	0.020038	0.00105528	0.00105528	0	0.000942623	0	0.00131544	0	0.00755744	0.0101995	0.0268865	0	0	0.000942623	0.000608435	0.000652405	0.0121107	0	0.00882994	0.00400868	0.0069703
Ochrobactrum	0.00649787	0.0316341	0	0.0165057	0.0148739	0.0129654	0.0164676	0.0921782	0.0443814	0.00730336	0.0137819	0.00931229	0.0214805	0.0393178	0.00403109	0.0189135	0.0164676	0.00848315	0.0208109	0.021284	0.0126633	0.0126633	0.0137718	0.0122541	0.00403004	0.0171008	0.0145896	0.0188936	0.0183591	0.0358487	0.0443554	0.0148666	0.0122541	0.00730122	0.00848127	0.0444059	0.00930882	0.0918314	0.0218322	0.021056
Libanicoccus	0.0108298	0.0210894	0.00298459	0.0214575	0.00524962	0.0166698	0.00395223	0.0558387	0.000672445	0.0048689	0.0110255	0.0349211	0.0724968	0.0442326	0.00403109	0.0567406	0.00395223	0.00326275	0.0207931	0.0223969	0.00158291	0.00158291	0	0	0.000671673	0.0171008	0.00397899	0.0302297	0.0224389	0.0358487	0	0.00174902	0	0.000608435	0.000652405	0.0524797	0.00232721	0.0335538	0.0113781	0.0164051
Proteus	0.00866382	0.027115	0.00238767	0.0643724	0.00874937	0.0407483	0.00856317	0.0345668	0.00268978	0.00365168	0.028942	0.00582018	0.037591	0.0393178	0.0026874	0.0441316	0.00856317	0.0052204	0.0207656	0.0189575	0.0153015	0.0153015	0.0289208	0.0113115	0.00268669	0.0907656	0.0225476	0.0396765	0.0326384	0.0448109	0.00268821	0.00874508	0.0113115	0.00365061	0.00521924	0.0666088	0.00581801	0.0344368	0.02458	0.0240926
Methylomonas	0.00866382	0.0346469	0.00358151	0.0148552	0.0157489	0.0129654	0.0171263	0.0469754	0.0100867	0.0103464	0.0413457	0.00814825	0.037591	0.0360413	0.00470294	0.033624	0.0171263	0.0195765	0.0207307	0.0137527	0.00791456	0.00791456	0.0413155	0.0103688	0.00470171	0.0302552	0.0212213	0.0188936	0.0183591	0.0179244	0.0100808	0.0157411	0.0103688	0.0103434	0.0195722	0.0706457	0.00814522	0.0467987	0.0205869	0.016992
Thermus	0.0108298	0.046698	0	0.0264092	0.00787443	0.0203741	0.0118567	0.0496344	0.00605201	0.00365168	0.00413457	0.00814825	0.0322208	0.0720827	0.00470294	0.0525376	0.0118567	0.0039153	0.0207211	0.0212187	0.0084422	0.0084422	0.00413155	0.0160246	0.00470171	0.0157853	0.0238739	0.0453446	0.0183591	0.0806596	0.00604847	0.00787057	0.0160246	0.00365061	0.00391443	0.0686273	0.00814522	0.0494477	0.0216385	0.0234318
Ornithobacterium	0.0238255	0.0406725	0.000596919	0.0181563	0.00262481	0.0203741	0.00526964	0.0558387	0.00537956	0.00730336	0.0151601	0.00698422	0.0537014	0.0622532	0.00201555	0.0357255	0.00526964	0.00978825	0.0206077	0.0202913	0.00211055	0.00211055	0.015149	0.00282787	0.00201502	0.0157853	0.019895	0.0170042	0.0244788	0.0537731	0.00537642	0.00262352	0.00282787	0.00730122	0.00978608	0.0625719	0.00698162	0.0556286	0.0171248	0.0197753
Atlantibacter	0.0238255	0.00753194	0.00298459	0.133696	0.013124	0.085201	0.00592835	0.0150676	0.00537956	0.00426029	0.00551276	0.0116404	0.0187955	0.00982946	0.00403109	0.012609	0.00592835	0	0.020297	0.0340065	0.00527638	0.00527638	0.00550873	0.000942623	0.00403004	0.0315706	0.0742745	0.0415659	0.0509975	0	0.00537642	0.0131176	0.000942623	0.00425905	0	0.00807379	0.011636	0.0150109	0.0154366	0.0207247
Photobacterium	0.0173276	0.0451916	0.00119384	0.0132046	0.013124	0.0148176	0.00988058	0.0496344	0.00537956	0.00730336	0.022051	0.00698422	0.0644416	0.0327649	0.00470294	0.0399285	0.00988058	0.00195765	0.0199871	0.0185377	0.0042211	0.0042211	0.0220349	0.00659836	0.00470171	0.0171008	0.019895	0.0132255	0.0183591	0.0268865	0.00537642	0.0131176	0.00659836	0.00730122	0.00195722	0.0605535	0.00698162	0.0494477	0.0160321	0.0159882
Cyclobacterium	0.00433191	0.0331405	0.000596919	0.0132046	0.00349975	0.00926097	0.00988058	0.0425438	0.00537956	0.00791197	0.0620185	0.00582018	0.0537014	0.0458708	0.00873404	0.033624	0.00988058	0.00717805	0.0198099	0.0196279	0.00527638	0.00527638	0.0619732	0.00565574	0.00873175	0.0144699	0.00132633	0.0188936	0.0040798	0.0268865	0.00537642	0.00349803	0.00565574	0.00790966	0.00717646	0.0706457	0.00581801	0.0423837	0.0167241	0.0207023
Niabella	0.0129957	0.046698	0.000596919	0.0214575	0.00524962	0.0185219	0.00856317	0.0434301	0.00537956	0.00852058	0.0206728	0.00232807	0.0483312	0.0442326	0.00403109	0.0504361	0.00856317	0.0052204	0.0197349	0.018178	0.00211055	0.00211055	0.0206577	0.00659836	0.00403004	0.0223625	0.0185686	0.0245617	0.0367182	0.0268865	0.00537642	0.00524705	0.00659836	0.00851809	0.00521924	0.0666088	0.00232721	0.0432667	0.0170982	0.0176008
Buchnera	0.0173276	0.0316341	0.00179076	0.0280598	0.00787443	0.0240785	0.00592835	0.0416574	0.00268978	0.0048689	0.0110255	0.0116404	0.0563864	0.054062	0.00873404	0.033624	0.00592835	0.00717805	0.0196938	0.0175	0.0126633	0.0126633	0.0110175	0.00471311	0.00873175	0.0276243	0.015916	0.0510127	0.0244788	0.0896218	0.00268821	0.00787057	0.00471311	0.00486748	0.00717646	0.115052	0.011636	0.0415007	0.0252193	0.0312518
Brenneria	0.0151617	0.0256086	0.00596919	0.0214575	0.0227484	0.0185219	0.0210786	0.0292488	0.0134489	0.0103464	0.0206728	0.0162965	0.0483312	0.0180207	0.00739034	0.0273195	0.0210786	0.0117459	0.0196914	0.00966287	0.0153015	0.0153015	0.0206577	0.0273361	0.0073884	0.0171008	0.00928431	0.0113362	0.0163192	0.0358487	0.013441	0.0227372	0.0273361	0.0103434	0.0117433	0.0302767	0.0162904	0.0291388	0.0187323	0.00826116
Nitrosomonas	0.00866382	0.0436852	0.00298459	0.00990344	0.0183737	0.00926097	0.0250308	0.0372258	0.0168111	0.0127809	0.0330765	0.00931229	0.0241656	0.0278501	0.00470294	0.033624	0.0250308	0.0110933	0.0196431	0.0120524	0.0137186	0.0137186	0.0330524	0.0292213	0.00470171	0.0157853	0.0185686	0.0151149	0.0183591	0.0448109	0.0168013	0.0183647	0.0292213	0.0127771	0.0110909	0.0484428	0.00930882	0.0370858	0.0216747	0.0124251
Anaeromyxobacter	0.0216596	0.0241022	0.00119384	0.0561195	0.00874937	0.0407483	0.00856317	0.0389984	0.00268978	0.00547752	0.00826913	0.00232807	0.040276	0.0344031	0.00201555	0.0399285	0.00856317	0.0091357	0.0196234	0.0176111	0.00369346	0.00369346	0.0082631	0.000942623	0.00201502	0.0447251	0.0305056	0.0566808	0.0387581	0.0358487	0.00268821	0.00874508	0.000942623	0.00547592	0.00913367	0.0444059	0.00232721	0.0388518	0.0187609	0.0193736
Aeromicrobium	0.0129957	0.0241022	0.00179076	0.0363126	0.0096243	0.0259307	0.0164676	0.0522934	0.0100867	0.0103464	0.0248074	0.00698422	0.0349059	0.0409561	0.00403109	0.016812	0.0164676	0.00587295	0.0194882	0.0140996	0.00263819	0.00263819	0.0247893	0.015082	0.00403004	0.0249934	0.0185686	0.0283404	0.0367182	0.0268865	0.0100808	0.00961959	0.015082	0.0103434	0.00587165	0.0282583	0.00698162	0.0520967	0.0179455	0.0133804
Roseateles	0.0129957	0.0105447	0.00298459	0.00990344	0.0454967	0.0111132	0.0494029	0.0115223	0.0322774	0.0170412	0.0192946	0.0209526	0.00537014	0.0114677	0.0154525	0.00840601	0.0494029	0.0169663	0.0194775	0.014687	0.0195226	0.0195226	0.0192806	0.0603278	0.0154485	0.00789266	0.0132633	0.020783	0.0040798	0	0.0322585	0.0454744	0.0603278	0.0170362	0.0169625	0.0100922	0.0209448	0.0114789	0.0219276	0.0172224
Celeribacter	0.0129957	0.0421788	0.000596919	0.0181563	0.0218734	0.0166698	0.00592835	0.0496344	0.0114316	0.00730336	0.0179165	0.0104763	0.0429611	0.0524238	0.00403109	0.0231165	0.00592835	0.00456785	0.0193439	0.0164727	0.00791456	0.00791456	0.0179034	0.00659836	0.00403004	0.023678	0.015916	0.020783	0.0163192	0.0179244	0.0114249	0.0218627	0.00659836	0.00730122	0.00456684	0.0504612	0.0104724	0.0494477	0.0167287	0.013567
Phreatobacter	0.00433191	0.0301277	0.00119384	0.0313609	0.00349975	0.0203741	0.0138328	0.0549524	0.0161387	0.00973781	0.0124037	0.0104763	0.0268507	0.0409561	0.00201555	0.037827	0.0138328	0.0163137	0.0192348	0.0149508	0.00474874	0.00474874	0.0123946	0.0131967	0.00201502	0.0407787	0.0145896	0.026451	0.0183591	0.0268865	0.0161292	0.00349803	0.0131967	0.00973497	0.0163101	0.0262398	0.0104724	0.0547457	0.017472	0.0135474
Rhizobacter	0.0194936	0.019583	0.00298459	0.0280598	0.0183737	0.0240785	0.0322766	0.0141813	0.0268978	0.0152153	0.0110255	0.0302649	0.00268507	0.00982946	0.0141088	0.0147105	0.0322766	0.0287122	0.0191532	0.00937703	0.017412	0.017412	0.0110175	0.0395901	0.0141051	0.023678	0.0132633	0.0226723	0.020399	0	0.0268821	0.0183647	0.0395901	0.0152109	0.0287058	0.0040369	0.0302537	0.0141279	0.0198179	0.0105863
Tessaracoccus	0.00649787	0.046698	0.000596919	0.0297103	0.0113742	0.0203741	0.00724576	0.0487481	0.0114316	0.00426029	0.00413457	0.00698422	0.0483312	0.0475091	0.00201555	0.0315225	0.00724576	0.00717805	0.0189921	0.0179807	0.0100251	0.0100251	0.00413155	0.00471311	0.00201502	0.0223625	0.011937	0.0340085	0.0387581	0.0448109	0.0114249	0.0113686	0.00471311	0.00425905	0.00717646	0.0524797	0.00698162	0.0485647	0.0183197	0.0171939
Muricauda	0.00649787	0.0421788	0.00179076	0.0198069	0.000874937	0.0148176	0.00329353	0.0416574	0.00941423	0.00182584	0.0192946	0.00349211	0.0617566	0.0507855	0.00403109	0.0462331	0.00329353	0.00848315	0.0188626	0.0201246	0.00369346	0.00369346	0.0192806	0.00282787	0.00403004	0.00789266	0.0252003	0.0358978	0.0265187	0.0537731	0.00940873	0.000874508	0.00282787	0.00182531	0.00848127	0.0504612	0.00349081	0.0415007	0.0167599	0.0178248
Methylorubrum	0.0173276	0.0241022	0.00358151	0.0396138	0.00612456	0.0296351	0.00922187	0.059384	0.012104	0.00669474	0.00964732	0.00465614	0.0241656	0.0376796	0.00537479	0.029421	0.00922187	0.0104408	0.0187998	0.0153911	0.00369346	0.00369346	0.00964028	0.00659836	0.00537338	0.0249934	0.0185686	0.026451	0.0224389	0.0268865	0.0120969	0.00612156	0.00659836	0.00669279	0.0104385	0.0343136	0.00465441	0.0591606	0.016023	0.0144447
Methylophaga	0.00866382	0.00451916	0.000596919	0.00330115	0.013124	0.00555658	0.00461094	0.0292488	0.0430365	0.075468	0.0840695	0.00465614	0.0161104	0.00819122	0.0114214	0.00840601	0.00461094	0.0123984	0.0187772	0.0244706	0.00580401	0.00580401	0.0840082	0.00377049	0.0114184	0.00526177	0.00795798	0.00377872	0.0061197	0.0358487	0.0430113	0.0131176	0.00377049	0.075446	0.0123957	0.00605535	0.00465441	0.0291388	0.0198534	0.0247241
Cellulomonas	0.0259915	0.0256086	0.00358151	0.034662	0.00349975	0.0314873	0.00922187	0.0478617	0.0127765	0.0133895	0.0151601	0.00465614	0.0268507	0.0294884	0.0026874	0.033624	0.00922187	0.0052204	0.0186105	0.0135591	0.00369346	0.00369346	0.015149	0.0084836	0.00268669	0.0276243	0.0278529	0.047234	0.0285586	0.0179244	0.012769	0.00349803	0.0084836	0.0133856	0.00521924	0.0343136	0.00465441	0.0476817	0.0173836	0.0148118
Schaalia	0.00866382	0.0391661	0.000596919	0.0280598	0.00349975	0.0203741	0.00724576	0.0434301	0.00470712	0.00243445	0.00413457	0.00582018	0.0537014	0.0425943	0.00201555	0.0567406	0.00724576	0	0.0183572	0.0199267	0.00211055	0.00211055	0.00413155	0.0084836	0.00201502	0.0131544	0.00530532	0.0226723	0.0142793	0.0537731	0.00470436	0.00349803	0.0084836	0.00243374	0	0.0423874	0.00581801	0.0432667	0.0132571	0.016385
Intestinimonas	0.00216596	0.00753194	0.00238767	0.00825287	0.0568709	0.00555658	0.0322766	0.00443164	0.0490885	0.0182584	0.0137819	0.0349211	0.0161104	0.0131059	0.0100777	0.00840601	0.0322766	0.013051	0.0182529	0.0161481	0.0168844	0.0168844	0.00688591	0.00377049	0.00940342	0.0710339	0.0437689	0.0850212	0.0693566	0.448109	0.00268821	0.0113686	0.00377049	0.00365061	0.00848127	0.660033	0.0209448	0.590723	0.115154	0.212424
Dialister	0.00649787	0.0436852	0.00238767	0.0165057	0.000874937	0.0129654	0.00395223	0.0469754	0.00134489	0.000608613	0.00137819	0.00232807	0.0590715	0.0786357	0.00403109	0.0399285	0.00395223	0.00326275	0.0182437	0.0241908	0.00158291	0.00158291	0.00137718	0.000942623	0.00403004	0.0157853	0.00663165	0.0151149	0.0122394	0.098584	0.0013441	0.000874508	0.000942623	0.000608435	0.00326203	0.0807379	0.00232721	0.0467987	0.0163759	0.0290191
Jeotgalibacillus	0.0216596	0.0346469	0.00298459	0.0313609	0.00437468	0.0277829	0.00395223	0.0478617	0.00336223	0.00426029	0.00826913	0.00465614	0.040276	0.0344031	0.00604664	0.0420301	0.00395223	0.00587295	0.0182085	0.0163957	0.00263819	0.00263819	0	0.00188525	0	0.00526177	0.00530532	0.00188936	0.0061197	0.0537731	0	0.000874508	0.00188525	0	0	0.0343136	0	0.0229579	0.00775234	0.0146185
Glaciecola	0.0129957	0.0451916	0.000596919	0.00660229	0.0096243	0.00926097	0.00922187	0.0425438	0.00672445	0.00669474	0.0303202	0.00931229	0.0456462	0.0442326	0.00335924	0.0273195	0.00922187	0.0078306	0.0181499	0.0161593	0.00633165	0.00633165	0.030298	0.0169672	0.00335836	0.00526177	0.019895	0.026451	0.0122394	0.0268865	0.00672052	0.00961959	0.0169672	0.00669279	0.00782886	0.0666088	0.00930882	0.0423837	0.0177862	0.0161798
Massilia	0.00433191	0.0436852	0.00179076	0.0181563	0.00262481	0.0129654	0.00658705	0.0682473	0.0134489	0.00791197	0.0124037	0.00698422	0.040276	0.0294884	0.00335924	0.037827	0.00658705	0.00848315	0.0180644	0.0184034	0.179924	0.179924	0.437944	0.371393	0.108139	0.259142	0.183034	0.179489	0.20399	0.0806596	0.245299	0.24836	0.371393	0.140549	0.232909	0.141291	0.342099	0.167769	0.226295	0.0983146
Ensifer	0.0108298	0.0241022	0.00298459	0.0148552	0.0104992	0.0129654	0.0105393	0.0611567	0.0147938	0.0133895	0.0110255	0.00582018	0.037591	0.0311266	0.00873404	0.0315225	0.0105393	0.0117459	0.0180123	0.0142909	0.00369346	0.00369346	0.0110175	0.0188525	0.00873175	0.023678	0.015916	0.0283404	0.020399	0.00896218	0.0147851	0.0104941	0.0188525	0.0133856	0.0117433	0.040369	0.00581801	0.0609266	0.0177588	0.0141295
Denitrobacterium	0.00649787	0.0391661	0	0.0297103	0.000874937	0.0203741	0.00526964	0.0452027	0	0.00121723	0	0	0.0563864	0.0524238	0.0013437	0.0567406	0.00526964	0.0026102	0.0179493	0.0221382	0.000527638	0.000527638	0	0.00565574	0.00134335	0.0157853	0.00928431	0.020783	0.0061197	0.0448109	0	0.000874508	0.00565574	0.00121687	0.00260962	0.040369	0	0.0450327	0.0111442	0.0159231
Mycobacteroides	0.0108298	0.0391661	0.00119384	0.0280598	0.00874937	0.0203741	0.00658705	0.0434301	0.0073969	0.00547752	0.0124037	0.00232807	0.0644416	0.0376796	0.00537479	0.0189135	0.00658705	0.0039153	0.0179393	0.0177072	0.00474874	0.00474874	0.0123946	0.00188525	0.00537338	0.0210471	0.0252003	0.0113362	0.0122394	0.0179244	0.00739257	0.00874508	0.00188525	0.00547592	0.00391443	0.0605535	0.00232721	0.0432667	0.0139144	0.0156204
Vagococcus	0.0108298	0.0361533	0.00119384	0.0132046	0.00437468	0.0129654	0.00329353	0.0416574	0.00134489	0.00304307	0.00551276	0.00349211	0.0644416	0.0557003	0.00671849	0.0483346	0.00329353	0.0052204	0.0178208	0.0210678	0.00738693	0.00738693	0.00550873	0.00377049	0.00671673	0.0131544	0.00530532	0.0283404	0.020399	0.0627353	0.0013441	0.00437254	0.00377049	0.00304218	0.00521924	0.0666088	0.00349081	0.0415007	0.0161141	0.0204708
Paenisporosarcina	0.00433191	0.0436852	0.00119384	0.00660229	0.00262481	0.00555658	0.00263482	0.0505207	0.000672445	0.00243445	0.00551276	0.00116404	0.0456462	0.0425943	0.00403109	0.0945676	0.00263482	0.0039153	0.0177957	0.0263309	0.00263819	0.00263819	0.00550873	0	0.00403004	0.00789266	0.00663165	0.00377872	0.0040798	0.0716974	0.000672052	0.00262352	0	0.00243374	0.00391443	0.0666088	0.0011636	0.0503307	0.0131468	0.0232973
Aminobacter	0.0173276	0.0316341	0.00298459	0.0181563	0.0122491	0.0185219	0.0164676	0.0629293	0.0100867	0.0121723	0.00551276	0.0116404	0.0241656	0.0245736	0.00671849	0.021015	0.0164676	0.00717805	0.0177667	0.0134934	0.0042211	0.0042211	0.00550873	0.0179098	0.00671673	0.0157853	0.0132633	0.0113362	0.0142793	0.0179244	0.0100808	0.0122431	0.0179098	0.0121687	0.00717646	0.0141291	0.011636	0.0626926	0.0144001	0.0128689
Dyella	0.00866382	0.0135575	0.00477535	0.0181563	0.013999	0.0148176	0.0184437	0.0265899	0.0195009	0.0133895	0.0192946	0.0174605	0.0241656	0.0245736	0.0114214	0.0357255	0.0184437	0.00978825	0.0173759	0.00730323	0.0121357	0.0121357	0.0192806	0.0235656	0.0114184	0.0157853	0.0145896	0.0245617	0.020399	0.0179244	0.0194895	0.0139921	0.0235656	0.0133856	0.00978608	0.0383505	0.017454	0.0264898	0.0185727	0.0069819
Solitalea	0.0173276	0.027115	0.00119384	0.00660229	0.000874937	0.0111132	0.00790446	0.0354531	0.00672445	0.00973781	0.0137819	0.00582018	0.0563864	0.0507855	0.00470294	0.0399285	0.00790446	0.0078306	0.0172882	0.0171618	0.00316583	0.00316583	0.0137718	0.00565574	0.00470171	0.0171008	0.00795798	0.00755744	0.0122394	0.0716974	0.00672052	0.000874508	0.00565574	0.00973497	0.00782886	0.058535	0.00581801	0.0353198	0.0154167	0.0197492
Borrelia	0.0129957	0.019583	0	0.0280598	0.00874937	0.0222263	0.00395223	0.0443164	0.00201734	0.00243445	0.00275638	0.00931229	0.0510163	0.0524238	0.0026874	0.0399285	0.00395223	0.00326275	0.0172041	0.0182228	0.00527638	0.00527638	0.00275437	0.00188525	0.00268669	0.0223625	0.0132633	0.0302297	0.0305985	0.0448109	0.00201616	0.00874508	0.00188525	0.00243374	0.00326203	0.100922	0.00930882	0.0441497	0.0184371	0.0252183
Dehalobacter	0.00649787	0.0482044	0.00119384	0.0165057	0.000874937	0.0129654	0.00263482	0.0407711	0.000672445	0.00304307	0.00137819	0.00465614	0.0724968	0.0425943	0.0013437	0.0483346	0.00263482	0.0026102	0.0171896	0.0225106	0.000527638	0.000527638	0.00137718	0	0.00134335	0.00526177	0.00265266	0.0132255	0.0081596	0.0268865	0.000672052	0.000874508	0	0.00304218	0.00260962	0.0524797	0.00465441	0.0406177	0.00916178	0.0152148
Aliivibrio	0.0129957	0.0331405	0.000596919	0.0198069	0.00524962	0.0166698	0.00526964	0.0407711	0.00201734	0.00121723	0.0137819	0.00232807	0.0537014	0.0475091	0.00201555	0.0399285	0.00526964	0.0026102	0.0169377	0.0179315	0.0042211	0.0042211	0.0137718	0.00282787	0.00201502	0.00657722	0.0145896	0.0094468	0.0265187	0.0716974	0.00201616	0.00524705	0.00282787	0.00121687	0.00260962	0.0423874	0.00232721	0.0406177	0.0141743	0.0192658
Dehalobacterium	0	0.0361533	0.00179076	0.0132046	0.00262481	0.0148176	0.00131741	0.0363395	0	0.00426029	0.00826913	0.00232807	0.0751819	0.054062	0.00201555	0.0504361	0.00131741	0.00065255	0.0169317	0.0231238	0.00211055	0.00211055	0.0082631	0.00282787	0.00201502	0.00394633	0.00928431	0.00755744	0.0101995	0.0179244	0	0.00262352	0.00282787	0.00425905	0.000652405	0.058535	0.00232721	0.0362028	0.00964816	0.0148991
Geminocystis	0.00866382	0.0331405	0.00298459	0.0330115	0.000874937	0.0222263	0.00329353	0.0345668	0.00403467	0.00304307	0.00551276	0.00582018	0.0563864	0.054062	0.00470294	0.025218	0.00329353	0.0039153	0.0169306	0.0182935	0.00527638	0.00527638	0.00550873	0.000942623	0.00470171	0.035517	0.0132633	0.0283404	0.0244788	0.098584	0.00403231	0.000874508	0.000942623	0.00304218	0.00391443	0.076701	0.00581801	0.0344368	0.0195362	0.0275926
Geosporobacter	0.00433191	0.0376597	0.00358151	0.00990344	0.00437468	0.00740878	0.00263482	0.0398848	0.00134489	0.00182584	0	0.00698422	0.0563864	0.054062	0.00537479	0.0525376	0.00263482	0.0123984	0.0168516	0.0205997	0.00474874	0.00474874	0	0	0.00537338	0.00789266	0.00397899	0.00755744	0.0142793	0.0537731	0.0013441	0.00437254	0	0.00182531	0.0123957	0.0524797	0.00698162	0.0397347	0.0123048	0.0173865
Mageeibacillus	0.00649787	0.0286214	0.00119384	0.011554	0.00524962	0.00926097	0.00197612	0.0522934	0.00134489	0.00426029	0.00137819	0.00465614	0.0349059	0.0589768	0.00671849	0.0672481	0.00197612	0.00456785	0.0168155	0.0218159	0.00263819	0.00263819	0.00275437	0.000942623	0.000671673	0.00789266	0.00132633	0.0094468	0.0040798	0.0358487	0	0	0.000942623	0.00121687	0.000652405	0.0423874	0.00465441	0.0353198	0.00852294	0.0138033
Propionibacterium	0.00649787	0.0451916	0.000596919	0.0214575	0.00349975	0.0148176	0.00329353	0.0319078	0.00672445	0.0048689	0.00413457	0.00349211	0.0617566	0.0409561	0.000671849	0.0441316	0.00329353	0.0052204	0.0168063	0.019247	0.00474874	0.00474874	0.00413155	0.000942623	0.000671673	0.0184162	0.011937	0.0226723	0.0367182	0.0268865	0.00672052	0.00349803	0.000942623	0.00486748	0.00521924	0.0363321	0.00349081	0.0317878	0.0124851	0.0127796
Ruminiclostridium	0.00216596	0.0391661	0.00179076	0.011554	0.00174987	0.00740878	0.00329353	0.0522934	0.000672445	0.000608613	0.00413457	0.00814825	0.0644416	0.0475091	0.0026874	0.0420301	0.00329353	0.00848315	0.0167462	0.021395	0.00369346	0.00369346	0.00413155	0.00659836	0.00268669	0.00526177	0.00397899	0.0113362	0.0101995	0.0179244	0.000672052	0.00174902	0.00659836	0.000608435	0.00848127	0.0787195	0.00814522	0.0520967	0.0125875	0.0202004
Acidithiobacillus	0.00433191	0.0301277	0.000596919	0.0165057	0.0122491	0.0111132	0.0283243	0.0310215	0.00874179	0.0048689	0.00964732	0.00349211	0.037591	0.0376796	0.00671849	0.0273195	0.0283243	0.0026102	0.0167369	0.0129114	0.0042211	0.0042211	0.00964028	0.0216803	0.00671673	0.0289398	0.00795798	0.0113362	0.0163192	0.0179244	0.00873668	0.0122431	0.0216803	0.00486748	0.00260962	0.0383505	0.00349081	0.0309048	0.0139911	0.0105773
Pediococcus	0.00216596	0.0421788	0.00417843	0.0132046	0.00437468	0.00926097	0.00526964	0.0443164	0.000672445	0.00182584	0.00413457	0.00582018	0.040276	0.0589768	0.00201555	0.0525376	0.00526964	0.0039153	0.0166885	0.0203233	0.00896984	0.00896984	0.00413155	0.00188525	0.00201502	0.011839	0.0106106	0.020783	0.0061197	0.0448109	0.000672052	0.00437254	0.00188525	0.00182531	0.00391443	0.0524797	0.00581801	0.0441497	0.0130695	0.0164854
Ichthyobacterium	0.0194936	0.0376597	0.000596919	0.023108	0.00524962	0.0222263	0.00988058	0.0398848	0.0100867	0.00730336	0.00551276	0.00349211	0.0322208	0.0425943	0.00201555	0.025218	0.00988058	0.00326275	0.0166492	0.0140408	0.000527638	0.000527638	0.00413155	0	0.000671673	0.00131544	0.00265266	0.00188936	0.0020399	0.0268865	0	0.00262352	0	0.000608435	0	0.018166	0	0.0141279	0.00423157	0.00756153
Cohnella	0.00649787	0.0301277	0.00298459	0.00990344	0.000874937	0.00926097	0.00329353	0.054066	0.00874179	0.00608613	0.00689094	0.00465614	0.0510163	0.0507855	0.00403109	0.0399285	0.00329353	0.0065255	0.0166091	0.0190051	0.0042211	0.0042211	0.00688591	0.00377049	0.00403004	0.011839	0.00132633	0.0170042	0.0163192	0.0268865	0.00873668	0.000874508	0.00377049	0.00608435	0.00652405	0.0524797	0.00465441	0.0538627	0.0129717	0.0160016
Mitsuaria	0.00649787	0.0150639	0.00298459	0.0148552	0.0253732	0.0111132	0.0276656	0.0132949	0.0188285	0.0200842	0.0234292	0.0162965	0.00537014	0.0147442	0.0100777	0.00840601	0.0276656	0.0352377	0.0164993	0.00876484	0.00896984	0.00896984	0.0234121	0.0207377	0.0100751	0.00657722	0.0132633	0.0132255	0.0101995	0.00896218	0.0188175	0.0253607	0.0207377	0.0200784	0.0352299	0.0222029	0.0162904	0.0132449	0.0164642	0.0074565
Thalassospira	0.00866382	0.0391661	0.00119384	0.0148552	0.00874937	0.0129654	0.00724576	0.0398848	0.0174836	0.00730336	0.0165383	0.0128044	0.040276	0.0278501	0.00604664	0.0189135	0.00724576	0.00978825	0.0164986	0.0122626	0.00738693	0.00738693	0.0165262	0.0103688	0.00604506	0.0210471	0.015916	0.0283404	0.0122394	0.0716974	0.0174734	0.00874508	0.0103688	0.00730122	0.00978608	0.0444059	0.0127996	0.0397347	0.0193094	0.0170772
Actinobacillus	0.00866382	0.0361533	0.00179076	0.0214575	0.00699949	0.0166698	0.00461094	0.0354531	0.00537956	0.0048689	0.022051	0.00814825	0.0349059	0.0458708	0.00470294	0.0315225	0.00461094	0.00195765	0.0164343	0.014467	0.0084422	0.0084422	0.0220349	0.00188525	0.00470171	0.0210471	0.0106106	0.0245617	0.0081596	0.0537731	0.00537642	0.00699606	0.00188525	0.00486748	0.00195722	0.0464243	0.00814522	0.0353198	0.0152572	0.0156404
Riemerella	0.0173276	0.0225958	0.00119384	0.0181563	0.00174987	0.0185219	0.00395223	0.0274762	0.00336223	0.00365168	0.0151601	0.00931229	0.040276	0.0344031	0.00335924	0.0441316	0.00395223	0.0267545	0.0164076	0.0138267	0.0042211	0.0042211	0.015149	0	0.00335836	0.0105235	0.0172423	0.0170042	0.0061197	0.0896218	0.00336026	0.00174902	0	0.00365061	0.0267486	0.0423874	0.00930882	0.0273728	0.0156688	0.0216926
Pluralibacter	0.00866382	0.0210894	0.00298459	0.0396138	0.00787443	0.0259307	0.017785	0.0212719	0.0073969	0.00730336	0.00413457	0.0116404	0.0268507	0.0344031	0.0026874	0.0315225	0.017785	0.0039153	0.0162696	0.011718	0.00527638	0.00527638	0.00413155	0.0245082	0.00268669	0.0210471	0.0225476	0.0302297	0.0387581	0.0358487	0.00739257	0.00787057	0.0245082	0.00730122	0.00391443	0.0302767	0.011636	0.0211919	0.0169112	0.0120596
Rubrivivax	0.00649787	0.00903832	0.00358151	0.0148552	0.0174987	0.0111132	0.022396	0.0194992	0.0201734	0.0139981	0.0275638	0.0128044	0.0134253	0.00819122	0.0127651	0.012609	0.022396	0.0443734	0.0162655	0.00930901	0.0084422	0.0084422	0.0275437	0.0169672	0.0127618	0.0276243	0.0145896	0.0151149	0.020399	0	0.0201616	0.0174902	0.0169672	0.013994	0.0443635	0.00605535	0.0127996	0.0194259	0.0168412	0.00972956
Fictibacillus	0.00216596	0.0301277	0.00119384	0.00495172	0.00174987	0.00370439	0.00131741	0.0522934	0.00134489	0.00182584	0.00413457	0.00232807	0.0644416	0.0507855	0.000671849	0.0651466	0.00131741	0.0026102	0.0162284	0.0242094	0.00263819	0.00263819	0.00413155	0.000942623	0.000671673	0.011839	0.00530532	0.00566808	0.0081596	0.0716974	0.0013441	0.00174902	0.000942623	0.00182531	0.00260962	0.0625719	0.00232721	0.0520967	0.0132866	0.0228973
Arachidicoccus	0.0151617	0.0180766	0.00119384	0.00825287	0.00437468	0.0111132	0.00658705	0.0434301	0.00470712	0.00669474	0.0151601	0.00814825	0.0429611	0.0589768	0.00604664	0.0273195	0.00658705	0.00717805	0.0162205	0.0163193	0.00369346	0.00369346	0.015149	0.00565574	0.00604506	0.0105235	0.0172423	0.020783	0.0122394	0.0358487	0.00470436	0.00437254	0.00565574	0.00669279	0.00717646	0.0706457	0.00814522	0.0432667	0.0156407	0.0176494
Saccharomonospora	0.00649787	0.0376597	0.000596919	0.023108	0.00612456	0.0166698	0.00197612	0.0460891	0.00941423	0.00608613	0.00551276	0.00232807	0.040276	0.0311266	0	0.0462331	0.00197612	0.00848315	0.0161199	0.0166748	0.00580401	0.00580401	0.00550873	0.00188525	0	0.0263089	0.015916	0.0283404	0.0326384	0.0716974	0.00940873	0.00612156	0.00188525	0.00608435	0.00848127	0.0464243	0.00232721	0.0459157	0.0178084	0.0200801
Moorea	0.0108298	0.0406725	0.00179076	0.0412643	0.00174987	0.0277829	0.00329353	0.0354531	0	0.00121723	0.00413457	0.00232807	0.040276	0.0409561	0.000671849	0.0315225	0.00329353	0.00195765	0.0160664	0.0175	0.000527638	0.000527638	0.00413155	0.00282787	0.000671673	0.0223625	0.0265266	0.0491233	0.0346783	0.0268865	0	0.00174902	0.00282787	0.00121687	0.00195722	0.0565166	0.00232721	0.0353198	0.0150099	0.0187498
Porphyrobacter	0.00433191	0.0316341	0.00119384	0.0247586	0.00524962	0.0166698	0.00724576	0.051407	0.0154662	0.00608613	0.0137819	0.00465614	0.0295358	0.0360413	0.00537479	0.0147105	0.00724576	0.0137035	0.0160607	0.0135826	0.0084422	0.0084422	0.0137718	0.0103688	0.00537338	0.0157853	0.0212213	0.0226723	0.020399	0.0179244	0.0154572	0.00524705	0.0103688	0.00608435	0.0137005	0.0343136	0.00465441	0.0512137	0.0158578	0.0116662
Persicobacter	0.00433191	0.0451916	0	0.00825287	0	0.00740878	0.00658705	0.0487481	0.00134489	0.00243445	0.00413457	0.00232807	0.0671267	0.0393178	0.00335924	0.0399285	0.00658705	0.00195765	0.0160577	0.0212789	0.00263819	0.00263819	0.00413155	0.00188525	0.00335836	0.0105235	0.00530532	0.00755744	0.0061197	0.0268865	0.0013441	0	0.00188525	0.00243374	0.00195722	0.0565166	0.00232721	0.0485647	0.0103374	0.016542
Methylomicrobium	0.00649787	0.0210894	0.000596919	0.0280598	0.0157489	0.0185219	0.0105393	0.0301352	0.0127765	0.00791197	0.0165383	0.0104763	0.037591	0.0360413	0.0026874	0.0189135	0.0105393	0.0039153	0.0160322	0.0110372	0.00633165	0.00633165	0.0165262	0.0103688	0.00268669	0.0131544	0.0145896	0.0302297	0.0305985	0.00896218	0.012769	0.0157411	0.0103688	0.00790966	0.00391443	0.0504612	0.0104724	0.0300218	0.0156354	0.0122174
Salegentibacter	0.0194936	0.0241022	0	0.00990344	0.00262481	0.0148176	0.00724576	0.0381121	0.00470712	0.00608613	0.0316983	0.00814825	0.037591	0.0376796	0.00537479	0.021015	0.00724576	0.0123984	0.0160135	0.0128672	0.00369346	0.00369346	0.0316752	0.0122541	0.00537338	0.0157853	0.0145896	0.0132255	0.0122394	0.0358487	0.00470436	0.00262352	0.0122541	0.00608435	0.0123957	0.0302767	0.00814522	0.0379688	0.0146017	0.0114744
Pseudopedobacter	0.0238255	0.0256086	0.000596919	0.00990344	0.00437468	0.0166698	0.0118567	0.0345668	0.00941423	0.00973781	0.0124037	0.00465614	0.037591	0.0409561	0.0026874	0.016812	0.0118567	0.013051	0.0159205	0.011986	0.00211055	0.00211055	0.0123946	0.0084836	0.00268669	0.0131544	0.00795798	0.0113362	0.0081596	0.0358487	0.00940873	0.00437254	0.0084836	0.00973497	0.0130481	0.0282583	0.00465441	0.0344368	0.0120356	0.0102946
Bdellovibrio	0.0129957	0.046698	0.00179076	0.011554	0.000874937	0.0129654	0.00461094	0.0425438	0.00201734	0.00182584	0.00413457	0.00582018	0.0456462	0.0393178	0.0026874	0.0441316	0.00461094	0.00195765	0.0158991	0.0181563	0.00316583	0.00316583	0.00413155	0.0179098	0.00268669	0.0157853	0.00795798	0.0132255	0.0244788	0.0268865	0.00201616	0.000874508	0.0179098	0.00182531	0.00195722	0.0645904	0.00581801	0.0423837	0.0142649	0.0168849
Chlorobaculum	0.0108298	0.0346469	0	0.0280598	0	0.0203741	0.00526964	0.0381121	0.00403467	0.00304307	0.00551276	0	0.0563864	0.0376796	0.000671849	0.033624	0.00526964	0.00195765	0.0158596	0.0176414	0.00316583	0.00316583	0.00550873	0.0103688	0.000671673	0.0223625	0.0172423	0.0340085	0.0326384	0.0627353	0.00403231	0	0.0103688	0.00304218	0.00195722	0.0504612	0	0.0379688	0.0166499	0.0191713
Mesorhizobium	0.00649787	0.019583	0.00298459	0.0181563	0.00349975	0.0129654	0.00526964	0.0416574	0.00134489	0.000608613	0.00413457	0.00232807	0.0644416	0.0491473	0.00403109	0.037827	0.00526964	0.0052204	0.0158315	0.0192374	0.0427387	0.0427387	0.101912	0.065041	0.0221652	0.114444	0.118043	0.153038	0.155032	0.125471	0.0994637	0.0673371	0.065041	0.0711869	0.0737218	0.250288	0.0663253	0.54834	0.12124	0.119135
Agromyces	0.0108298	0.0286214	0.000596919	0.0379632	0.00437468	0.0259307	0.00526964	0.0416574	0.00941423	0.00547752	0.00826913	0.00232807	0.037591	0.0327649	0.0013437	0.0231165	0.00526964	0.0039153	0.0158185	0.0145257	0.00369346	0.00369346	0.0082631	0.00188525	0.00134335	0.0171008	0.0225476	0.0226723	0.0387581	0.0179244	0.00940873	0.00437254	0.00188525	0.00547592	0.00391443	0.0423874	0.00232721	0.0415007	0.0138419	0.0142899
Anaerococcus	0.00866382	0.0286214	0.00238767	0.0214575	0.000874937	0.0166698	0.000658705	0.0505207	0.00134489	0.000608613	0	0.00349211	0.0590715	0.0491473	0.0026874	0.033624	0.000658705	0.00326275	0.015764	0.0199807	0.00527638	0.00527638	0	0	0.00268669	0.00394633	0.00397899	0.00755744	0.0163192	0.0358487	0.0013441	0.000874508	0	0.000608435	0.00326203	0.0787195	0.00349081	0.0503307	0.0121956	0.0213946
Desulfococcus	0.00216596	0.046698	0.00119384	0.0181563	0.000874937	0.0111132	0.00329353	0.0283625	0.00134489	0.00426029	0.00826913	0.00349211	0.0349059	0.0622532	0	0.0525376	0.00329353	0.0013051	0.0157511	0.0202302	0.000527638	0.000527638	0.0082631	0.000942623	0	0.0157853	0.00795798	0.0113362	0.0224389	0.0179244	0.0013441	0.000874508	0.000942623	0.00425905	0.00130481	0.0565166	0.00349081	0.0282558	0.0101496	0.0143676
Haliscomenobacter	0.00866382	0.046698	0.000596919	0.0297103	0.00262481	0.0203741	0.00790446	0.0319078	0.00537956	0.00426029	0.00551276	0.00232807	0.0349059	0.0344031	0.000671849	0.029421	0.00790446	0.0065255	0.015544	0.0148489	0.0042211	0.0042211	0.00550873	0.00659836	0.000671673	0.0276243	0.00928431	0.0302297	0.0305985	0.0627353	0.00537642	0.00262352	0.00659836	0.00425905	0.00652405	0.0544981	0.00232721	0.0317878	0.0164271	0.0188083
Methylibium	0.00866382	0.0105447	0.00298459	0.0148552	0.0227484	0.0129654	0.0230547	0.0141813	0.024208	0.0158239	0.0275638	0.0186246	0.00268507	0.00655297	0.0100777	0.00630451	0.0230547	0.0313224	0.0153453	0.0085494	0.0147739	0.0147739	0.0275437	0.0367623	0.0100751	0.0131544	0.0132633	0.020783	0.0122394	0	0.0241939	0.0227372	0.0367623	0.0158193	0.0313154	0.0100922	0.0186176	0.0141279	0.0187242	0.00970422
Finegoldia	0.00216596	0.0256086	0.00238767	0.0165057	0.00524962	0.0111132	0.00263482	0.0452027	0.00201734	0.00243445	0.00826913	0.0139684	0.0456462	0.0507855	0.000671849	0.033624	0.00263482	0.0026102	0.0151961	0.0172598	0.0042211	0.0042211	0.0082631	0	0.000671673	0.0092081	0.00530532	0.00566808	0.0122394	0.0716974	0.00201616	0.00524705	0	0.00243374	0.00260962	0.0605535	0.0139632	0.0450327	0.0140751	0.0215677
Leptotrichia	0.00433191	0.00753194	0.00238767	0.00990344	0.0227484	0.00740878	0.0263482	0.00886328	0.0322774	0.0176498	0.00964732	0.0162965	0.0161104	0.00819122	0.0100777	0.012609	0.0263482	0.0326275	0.0150755	0.00936683	0.00633165	0.00633165	0.015149	0.000942623	0.00671673	0.0289398	0.0106106	0.0377872	0.0265187	0.0896218	0	0.00524705	0.000942623	0.00304218	0.00652405	0.129181	0.00814522	0.0635756	0.024756	0.0354082
Ruegeria	0.0151617	0.0391661	0.00179076	0.011554	0.00174987	0.0129654	0.00592835	0.051407	0.00336223	0.00243445	0.0110255	0.0104763	0.0322208	0.0278501	0.00335924	0.0315225	0.00592835	0.00326275	0.0150647	0.0149068	0.00369346	0.00369346	0.0110175	0.0103688	0.00335836	0.0210471	0.011937	0.00377872	0.0101995	0.0358487	0.00336026	0.00174902	0.0103688	0.00243374	0.00326203	0.0464243	0.0104724	0.0512137	0.0135682	0.0152794
Rothia	0.00433191	0.0210894	0	0.00990344	0.00437468	0.00740878	0.00461094	0.0452027	0.000672445	0.0048689	0.00826913	0.00349211	0.040276	0.0688062	0.00335924	0.033624	0.00461094	0.0052204	0.0150067	0.0192478	0.00527638	0.00527638	0.0082631	0.00471311	0.00335836	0.00789266	0.00928431	0.00755744	0.0101995	0.0627353	0.000672052	0.00437254	0.00471311	0.00486748	0.00521924	0.0302767	0.00349081	0.0450327	0.0124001	0.0166002
Caloramator	0	0.0316341	0.00238767	0.00165057	0.00524962	0.00185219	0.00131741	0.0549524	0.000672445	0.00304307	0.00137819	0.00698422	0.0644416	0.0491473	0.00470294	0.0357255	0.00131741	0.00326275	0.0149844	0.021638	0.00316583	0.00316583	0.00137718	0.000942623	0.00470171	0.00789266	0.00132633	0.0094468	0.0142793	0.116508	0.000672052	0.00524705	0.000942623	0.00304218	0.00326203	0.0706457	0.00698162	0.0547457	0.0171303	0.0314172
Candidatus Azobacteroides	0.00433191	0.0301277	0.00119384	0.0148552	0.000874937	0.0111132	0.00461094	0.0496344	0	0.00791197	0.0137819	0.00582018	0.0617566	0.0311266	0.00201555	0.021015	0.00461094	0.0039153	0.0149276	0.0176537	0.00263819	0.00263819	0.0137718	0.00377049	0.00201502	0.0171008	0.0132633	0.00377872	0.0040798	0.0448109	0	0.000874508	0.00377049	0.00790966	0.00391443	0.102941	0.00581801	0.0494477	0.0156968	0.0259669
Ureibacillus	0.00649787	0.0241022	0.000596919	0.00495172	0.00787443	0.00555658	0	0.0389984	0.00134489	0.00121723	0.00275638	0.00349211	0.0241656	0.0458708	0.00470294	0.0945676	0	0.00195765	0.0149252	0.0241713	0.00105528	0.00105528	0.00275437	0	0.00470171	0.00789266	0.00265266	0.00188936	0.0040798	0.0806596	0.0013441	0.00787057	0	0.00121687	0.00195722	0.0484428	0.00349081	0.0388518	0.0116619	0.0218509
Faecalitalea	0	0.0286214	0.00298459	0.011554	0.00437468	0.0129654	0.00131741	0.0434301	0	0.00730336	0.00551276	0.00465614	0.0429611	0.0557003	0.00537479	0.037827	0.00131741	0.0026102	0.0149173	0.0180737	0.00211055	0.00211055	0.00550873	0	0.00537338	0.0092081	0.00397899	0.0094468	0.0081596	0.0896218	0	0.00437254	0	0.00730122	0.00260962	0.0565166	0.00465441	0.0432667	0.0141244	0.0241718
Nitrospira	0.0151617	0.0406725	0.00537227	0.023108	0.00699949	0.0203741	0.00461094	0.0283625	0.00336223	0.00365168	0.00413457	0.00349211	0.0241656	0.0360413	0.00335924	0.0315225	0.00461094	0.00848315	0.0148603	0.0128267	0.00316583	0.00316583	0.00413155	0.00471311	0.00335836	0.0184162	0.00795798	0.0132255	0.0163192	0.0358487	0.00336026	0.00699606	0.00471311	0.00365061	0.00848127	0.0423874	0.00349081	0.0282558	0.0117576	0.012093
Aquiflexum	0.00866382	0.0256086	0	0.00825287	0.00262481	0.00926097	0.00461094	0.0327942	0.00605201	0.00608613	0.0372111	0.00349211	0.0483312	0.0311266	0.00537479	0.029421	0.00461094	0.00195765	0.0147489	0.0148872	0.00211055	0.00211055	0.0371839	0.00282787	0.00537338	0.00657722	0.00795798	0.0094468	0	0.0448109	0.00604847	0.00262352	0.00282787	0.00608435	0.00195722	0.0383505	0.00349081	0.0326708	0.0118029	0.0148865
Parvimonas	0	0.027115	0.00179076	0.00990344	0.00699949	0.0111132	0.00197612	0.0443164	0.00134489	0.00182584	0.00689094	0.00582018	0.0456462	0.0475091	0.00335924	0.0441316	0.00197612	0.00326275	0.0147212	0.0179487	0.000527638	0.000527638	0.00688591	0.000942623	0.00335836	0.0131544	0.00795798	0.0132255	0.0101995	0.0537731	0.0013441	0.00699606	0.000942623	0.00182531	0.00326203	0.0645904	0.00581801	0.0441497	0.0133045	0.0195559
Salinimonas	0.0216596	0.0391661	0.000596919	0.00660229	0.00262481	0.0129654	0.00592835	0.0354531	0.00403467	0.00304307	0.0344547	0.00232807	0.0295358	0.0294884	0.00403109	0.025218	0.00592835	0.00065255	0.0146506	0.0139292	0.00580401	0.00580401	0.0344296	0.0084836	0.00403004	0.00394633	0.0212213	0.0321191	0.0224389	0.0537731	0.00403231	0.00262352	0.0084836	0.00304218	0.000652405	0.0262398	0.00232721	0.0353198	0.015265	0.0155022
Weeksella	0.0758084	0.0150639	0	0.00165057	0	0.0333395	0.00461094	0.0177266	0.00134489	0.0103464	0.0165383	0.00465614	0.0322208	0.0180207	0.0013437	0.0105075	0.00461094	0.0156612	0.0146361	0.0183326	0.00211055	0.00211055	0.0165262	0.00188525	0.00134335	0.0381479	0.0331583	0.00755744	0.0183591	0.0358487	0.0013441	0	0.00188525	0.0103434	0.0156577	0.0282583	0.00465441	0.0176599	0.0131584	0.0130484
Gemella	0.00433191	0.0301277	0.000596919	0.0148552	0.00524962	0.0111132	0.00197612	0.0336805	0.000672445	0.00243445	0.00551276	0.00349211	0.0537014	0.0442326	0	0.0462331	0.00197612	0.00326275	0.014636	0.0181859	0.00580401	0.00580401	0.00550873	0.000942623	0	0.0131544	0.00663165	0.0170042	0.0101995	0.0716974	0.000672052	0.00524705	0.000942623	0.00243374	0.00326203	0.0686273	0.00349081	0.0335538	0.0141653	0.0218695
Thermosipho	0.00433191	0.0241022	0.00119384	0.0165057	0.00437468	0.0111132	0.00329353	0.0354531	0.00268978	0.00304307	0.00689094	0.00465614	0.0456462	0.0491473	0.00201555	0.0441316	0.00329353	0.0013051	0.0146215	0.0171235	0.00263819	0.00263819	0.00688591	0	0.00201502	0.0105235	0.00795798	0.00566808	0.0142793	0.0358487	0.00268821	0.00437254	0	0.00304218	0.00130481	0.0444059	0.00465441	0.0353198	0.0102357	0.013619
Streptosporangium	0.00649787	0.0316341	0.00238767	0.0280598	0.00174987	0.0185219	0.00395223	0.0292488	0.00605201	0.0048689	0.00826913	0.00232807	0.037591	0.0311266	0.000671849	0.0399285	0.00395223	0.00587295	0.0145952	0.0141001	0.0042211	0.0042211	0.0082631	0.000942623	0.000671673	0.0210471	0.0145896	0.0283404	0.0265187	0.00896218	0.00604847	0.00174902	0.000942623	0.00486748	0.00587165	0.0302767	0.00232721	0.0291388	0.0110555	0.0108943
Hahella	0.00216596	0.019583	0	0.0132046	0.00787443	0.00926097	0.0138328	0.0274762	0.0154662	0.00608613	0.0248074	0.00931229	0.0161104	0.0376796	0.00470294	0.0315225	0.0138328	0.0091357	0.0145586	0.0102606	0.0105528	0.0105528	0.0247893	0.0160246	0.00470171	0.0157853	0.011937	0.0170042	0.0101995	0.0268865	0.0154572	0.00787057	0.0160246	0.00608435	0.00913367	0.0282583	0.00930882	0.0273728	0.0148858	0.00746701
Terriglobus	0.00216596	0.0301277	0	0.034662	0.00349975	0.0203741	0.00263482	0.0327942	0.000672445	0.00182584	0.00413457	0.00116404	0.0510163	0.0311266	0.00201555	0.0357255	0.00263482	0.0039153	0.0144716	0.0167161	0.00158291	0.00158291	0.00413155	0	0.00201502	0.0184162	0.00795798	0.026451	0.0265187	0.0358487	0.000672052	0.00349803	0	0.00182531	0.00391443	0.0423874	0.0011636	0.0326708	0.011702	0.0144478
Pseudoflavitalea	0.00216596	0.0346469	0.00358151	0.0181563	0.00349975	0.0111132	0.00461094	0.0327942	0.00268978	0.00608613	0.00964732	0.00465614	0.040276	0.0425943	0.0026874	0.0315225	0.00461094	0.00456785	0.0144393	0.0146842	0.00316583	0.00316583	0.00964028	0.00471311	0.00268669	0.0131544	0.0132633	0.026451	0.0142793	0.0179244	0.00268821	0.00349803	0.00471311	0.00608435	0.00456684	0.0464243	0.00465441	0.0326708	0.0118747	0.0121797
Orrella	0.0129957	0.00602555	0.00835686	0.00825287	0.0122491	0.0111132	0.0237134	0.0186129	0.024208	0.0182584	0.0124037	0.0139684	0.00805521	0.00819122	0.0154525	0.00420301	0.0237134	0.0293647	0.0143966	0.00717905	0.0121357	0.0121357	0.0123946	0.0386475	0.0154485	0.0131544	0.011937	0.00377872	0.0081596	0	0.0241939	0.0122431	0.0386475	0.0182531	0.0293582	0.018166	0.0139632	0.0185429	0.0167311	0.0103778
Pannonibacter	0.00866382	0.0150639	0.000596919	0.0148552	0.0174987	0.0129654	0.0105393	0.0460891	0.0174836	0.00547752	0.00551276	0.00465614	0.0268507	0.0262119	0.00335924	0.0231165	0.0105393	0.0091357	0.0143675	0.010989	0.00633165	0.00633165	0.00550873	0.00282787	0.00335836	0.00657722	0.00530532	0.0151149	0.0122394	0.0179244	0.0174734	0.0174902	0.00282787	0.00547592	0.00913367	0.0222029	0.00465441	0.0459157	0.011483	0.010524
Halobacillus	0.00216596	0.0301277	0.00238767	0.0132046	0.00349975	0.00926097	0.00197612	0.0354531	0	0.00426029	0.00275638	0.00232807	0.037591	0.0507855	0.0026874	0.0525376	0.00197612	0.0052204	0.0143455	0.0180994	0.00369346	0.00369346	0.00275437	0	0.00268669	0.0105235	0.00928431	0.0132255	0.0061197	0.0627353	0	0.00349803	0	0.00425905	0.00521924	0.0726642	0.00232721	0.0353198	0.0132224	0.0214623
Tetragenococcus	0	0.0180766	0.00179076	0.0247586	0.00437468	0.0277829	0.000658705	0.0327942	0.000672445	0.00365168	0.0124037	0.00465614	0.0295358	0.0344031	0.00335924	0.0525376	0.000658705	0.00587295	0.0143327	0.0156504	0.00474874	0.00474874	0.0123946	0	0.00335836	0.0144699	0.00663165	0.0113362	0.0163192	0.0627353	0.000672052	0.00437254	0	0.00365061	0.00587165	0.0686273	0.00465441	0.0326708	0.0142923	0.0202675
Aneurinibacillus	0.00216596	0.0451916	0.00238767	0.0132046	0.00524962	0.00926097	0.00263482	0.0389984	0.000672445	0.000608613	0.00137819	0.00116404	0.037591	0.054062	0.00201555	0.037827	0.00263482	0.00065255	0.0143167	0.0187255	0.00211055	0.00211055	0.00137718	0	0.00201502	0.00657722	0.00132633	0.00755744	0.0101995	0.0448109	0.000672052	0.00524705	0	0.000608435	0.000652405	0.0302767	0.0011636	0.0388518	0.00864204	0.0140189
Desulfomicrobium	0.0108298	0.0301277	0.00238767	0.0181563	0.00349975	0.0148176	0.00592835	0.0327942	0.00134489	0.0048689	0	0.00232807	0.037591	0.0409561	0.0026874	0.0399285	0.00592835	0.0013051	0.0141933	0.0150223	0.00369346	0.00369346	0	0.000942623	0.00268669	0.0223625	0.0265266	0.0094468	0.0122394	0.0448109	0.0013441	0.00349803	0.000942623	0.00486748	0.00130481	0.0484428	0.00232721	0.0326708	0.0123222	0.0157423
Chryseolinea	0.0129957	0.0361533	0	0.0264092	0.000874937	0.0203741	0.00461094	0.0292488	0.00336223	0.00365168	0.0151601	0.00232807	0.0349059	0.0376796	0.000671849	0.021015	0.00461094	0.0013051	0.0141865	0.0137338	0.00105528	0.00105528	0.015149	0.00377049	0.000671673	0.0276243	0.0278529	0.0340085	0.0469177	0.00896218	0.00336026	0.000874508	0.00377049	0.00365061	0.00130481	0.0504612	0.00232721	0.0291388	0.0145531	0.0168964
Desulfuromonas	0	0.0361533	0.000596919	0.0247586	0.00612456	0.0277829	0.00329353	0.0336805	0.00403467	0.00304307	0.00413457	0.00465614	0.0268507	0.0344031	0.000671849	0.037827	0.00329353	0.0039153	0.0141789	0.0147182	0.00105528	0.00105528	0.00413155	0.00471311	0.000671673	0.023678	0.0106106	0.0151149	0.0244788	0.0448109	0.00403231	0.00612156	0.00471311	0.00304218	0.00391443	0.0464243	0.00465441	0.0335538	0.0131542	0.0150285
Nocardiopsis	0.0173276	0.0256086	0.00119384	0.0264092	0.00262481	0.0222263	0.00658705	0.0239309	0.00470712	0.00669474	0.00964732	0.00232807	0.0295358	0.0311266	0.00335924	0.029421	0.00658705	0.00587295	0.0141771	0.0111554	0.00527638	0.00527638	0.00964028	0.00377049	0.00335836	0.0302552	0.0172423	0.0245617	0.0142793	0.00896218	0.00470436	0.00262352	0.00377049	0.00669279	0.00587165	0.040369	0.00232721	0.0238408	0.0118235	0.0110718
Kibdelosporangium	0.0108298	0.00753194	0.000596919	0.00495172	0.00699949	0.00740878	0.00922187	0.0186129	0.00941423	0.0170412	0.104742	0	0.0134253	0.0147442	0	0.016812	0.00922187	0.00326275	0.0141565	0.02333	0.00105528	0.00105528	0	0	0.00134335	0.00526177	0.0145896	0.0113362	0.0224389	0.00896218	0.00201616	0	0	0.00182531	0.00326203	0.0100922	0.00581801	0.0132449	0.0056834	0.0064382
Niastella	0.00866382	0.019583	0	0.0181563	0.00174987	0.0148176	0.00329353	0.0345668	0.012104	0.00669474	0.0110255	0.00814825	0.0483312	0.0360413	0.0013437	0.0189135	0.00329353	0.00717805	0.0141058	0.0134407	0.00369346	0.00369346	0.0110175	0.00471311	0.00134335	0.0131544	0.0132633	0.0132255	0.020399	0.0179244	0.0120969	0.00174902	0.00471311	0.00669279	0.00717646	0.0524797	0.00814522	0.0344368	0.0127732	0.0127681
Thermaerobacter	0.0108298	0.0301277	0.00119384	0.0247586	0.000874937	0.0185219	0.00131741	0.0389984	0	0.00365168	0.00137819	0.00232807	0.0456462	0.0278501	0	0.0420301	0.00131741	0.0026102	0.0140797	0.0164361	0.00158291	0.00158291	0.00137718	0	0	0.0092081	0.0238739	0.0188936	0.0163192	0.0179244	0	0.000874508	0	0.00365061	0.00260962	0.0504612	0.00232721	0.0388518	0.0105298	0.014738
Cryobacterium	0.0108298	0.0316341	0.000596919	0.0132046	0.00699949	0.0129654	0.00790446	0.0283625	0.00605201	0.0048689	0.00137819	0.031429	0.0214805	0.0344031	0.0013437	0.029421	0.00790446	0.00195765	0.0140409	0.0120216	0.00580401	0.00580401	0.00137718	0.0141393	0.00134335	0.0157853	0.0172423	0.026451	0.0224389	0.00896218	0.00604847	0.00699606	0.0141393	0.00486748	0.00195722	0.0302767	0.0314173	0.0282558	0.013517	0.0103676
Actinomadura	0	0.0225958	0.00119384	0.0181563	0.013999	0.0203741	0.00592835	0.0239309	0.0114316	0.0048689	0.00826913	0.00931229	0.037591	0.0360413	0.00335924	0.021015	0.00592835	0.00848315	0.0140266	0.0111163	0.00738693	0.00738693	0.0082631	0.00377049	0.00335836	0.0302552	0.0145896	0.026451	0.020399	0.0179244	0.0114249	0.0139921	0.00377049	0.00486748	0.00848127	0.0524797	0.00930882	0.0238408	0.0148861	0.0124257
Maribacter	0.00866382	0.0256086	0.000596919	0.0198069	0.00349975	0.0148176	0.00592835	0.0283625	0.00134489	0.00304307	0.0179165	0.00232807	0.0322208	0.0425943	0.0013437	0.033624	0.00592835	0.0026102	0.0139021	0.013461	0.00738693	0.00738693	0.0358068	0.0084836	0.0114184	0.0420942	0.0225476	0.0585701	0.0285586	0.161319	0.0161292	0.00524705	0.0084836	0.0127771	0.0176149	0.129181	0.0104724	0.0777035	0.0367323	0.0444082
Chlamydia	0.00649787	0.0301277	0.00179076	0.00825287	0.000874937	0.00740878	0.00658705	0.0310215	0.00268978	0.00121723	0.00413457	0.00349211	0.037591	0.0491473	0.0013437	0.0441316	0.00658705	0.0065255	0.0138567	0.0163209	0.00369346	0.00369346	0.00413155	0.000942623	0.00134335	0.011839	0.0132633	0.0113362	0.0142793	0.0627353	0.00268821	0.000874508	0.000942623	0.00121687	0.00652405	0.0565166	0.00349081	0.0309048	0.0128009	0.0186233
Verrucomicrobium	0.00649787	0.0301277	0	0.0313609	0.0148739	0.0203741	0.00197612	0.0301352	0.00672445	0.00182584	0.00413457	0.00814825	0.0214805	0.0344031	0.0026874	0.0315225	0.00197612	0	0.0137916	0.0129248	0.00527638	0.00527638	0.00413155	0.00377049	0.00268669	0.023678	0.019895	0.020783	0.020399	0.0448109	0.00672052	0.0148666	0.00377049	0.00182531	0	0.0423874	0.00814522	0.0300218	0.014358	0.0138139
Dehalococcoides	0.00433191	0.0286214	0.00179076	0.0165057	0.00349975	0.0111132	0.00197612	0.0354531	0.00201734	0.000608613	0.00275638	0	0.0456462	0.0475091	0.00403109	0.0357255	0.00197612	0.0039153	0.0137488	0.0167546	0.00316583	0.00316583	0.00275437	0.00377049	0.00403004	0.0105235	0.00928431	0.0094468	0.0101995	0.0179244	0.00201616	0.00349803	0.00377049	0.000608435	0.00391443	0.040369	0	0.0353198	0.00909785	0.0113838
Salinivirga	0	0.027115	0	0.011554	0	0.0129654	0.00461094	0.0363395	0.00201734	0.00547752	0.0124037	0.00232807	0.0429611	0.0376796	0.000671849	0.0420301	0.00461094	0.00456785	0.0137407	0.0158076	0.00263819	0.00263819	0.0123946	0.00471311	0.000671673	0.0105235	0.00795798	0.0132255	0.0101995	0.0716974	0.00201616	0	0.00471311	0.00547592	0.00456684	0.0544981	0.00232721	0.0362028	0.0136922	0.0199594
Halanaerobium	0.00649787	0.0286214	0.00238767	0.0148552	0.00699949	0.0111132	0.00395223	0.0354531	0.00403467	0.00365168	0.00551276	0.00465614	0.0483312	0.0344031	0.00335924	0.0273195	0.00395223	0.00195765	0.0137255	0.0143897	0.0084422	0.0084422	0.00550873	0	0.00335836	0.0105235	0.00265266	0.0132255	0.0081596	0.0179244	0.00403231	0.00699606	0	0.00365061	0.00195722	0.0666088	0.00465441	0.0353198	0.011192	0.0160848
Ketobacter	0.00649787	0.0241022	0.00238767	0.00660229	0.00699949	0.00740878	0.00395223	0.0292488	0.00470712	0.00243445	0.0358329	0.00116404	0.037591	0.0360413	0.0013437	0.033624	0.00395223	0.00195765	0.0136582	0.0142806	0.00791456	0.00791456	0.00688591	0.00471311	0.00201502	0.00131544	0.00265266	0.00377872	0.0020399	0.00896218	0.00336026	0.00524705	0.00471311	0.00365061	0.000652405	0.0141291	0.00465441	0.0132449	0.00543578	0.0038052
Leptospira	0.00433191	0.0482044	0.000596919	0.0165057	0.00262481	0.0111132	0.00131741	0.0345668	0.00403467	0.000608613	0.0110255	0.00232807	0.0214805	0.0458708	0.00201555	0.0315225	0.00131741	0.00587295	0.0136299	0.0159806	0.00527638	0.00527638	0.0179034	0.00471311	0.00268669	0.0210471	0.011937	0.0302297	0.0305985	0.0716974	0.00201616	0.00262352	0.00471311	0.00365061	0.00521924	0.108996	0.00349081	0.0741715	0.0225693	0.0309464
Liberibacter	0.00649787	0.0391661	0.00179076	0.0148552	0.00174987	0.0111132	0	0.0336805	0	0.000608613	0	0.00232807	0.0429611	0.0475091	0.000671849	0.037827	0	0.00065255	0.0134118	0.0177625	0.0042211	0.0042211	0.00275437	0.000942623	0.000671673	0.00789266	0.00265266	0.0094468	0.0163192	0.0358487	0.00268821	0.000874508	0.000942623	0.00121687	0.00195722	0.0423874	0.00349081	0.0141279	0.00848091	0.0120845
Ornithinimicrobium	0.0194936	0.0165703	0.00179076	0.023108	0.00787443	0.0222263	0.00526964	0.0265899	0.00605201	0.0048689	0.0110255	0.00349211	0.037591	0.0229354	0.0013437	0.021015	0.00526964	0.00456785	0.0133936	0.0105129	0.00474874	0.00474874	0.0110175	0.00377049	0.00134335	0.0276243	0.0106106	0.0132255	0.0142793	0.00896218	0.00604847	0.00787057	0.00377049	0.00486748	0.00456684	0.0222029	0.00349081	0.0264898	0.0099799	0.00800265
Obesumbacterium	0	0.0120511	0.139679	0.00165057	0.027123	0.00185219	0.00395223	0.00354531	0.00403467	0.0164326	0.00689094	0.00814825	0	0.00655297	0.00201555	0.0021015	0.00395223	0	0.0133323	0.032261	0.00158291	0.00158291	0.00688591	0.00942623	0.00201502	0.00131544	0.00530532	0.00566808	0.0040798	0	0.00403231	0.0271098	0.00942623	0.0164278	0	0.00605535	0.00814522	0.00353198	0.00625501	0.00662058
Microvirga	0.00649787	0.0286214	0.00298459	0.0214575	0.00437468	0.0148176	0.00724576	0.0398848	0.0107591	0.00852058	0.00689094	0.00814825	0.0161104	0.0229354	0.00403109	0.0189135	0.00724576	0.00978825	0.0132904	0.00983211	0.00316583	0.00316583	0.00688591	0.00659836	0.00403004	0.0105235	0.00663165	0.0188936	0.0142793	0.0358487	0.0107528	0.00437254	0.00659836	0.00851809	0.00978608	0.018166	0.00814522	0.0397347	0.0120054	0.0104472
Fastidiosipila	0	0.0391661	0.00119384	0.00660229	0.000874937	0.00740878	0.00197612	0.0327942	0	0.00243445	0	0.00232807	0.0322208	0.0737209	0	0.033624	0.00197612	0.0026102	0.0132739	0.0205341	0.00211055	0.00211055	0	0	0	0.00131544	0.00530532	0.0132255	0.0020399	0.0268865	0	0.000874508	0	0.00243374	0.00260962	0.0565166	0.00232721	0.0326708	0.00835701	0.0152702
Cloacibacillus	0.00866382	0.0225958	0.000596919	0.0198069	0.00437468	0.0148176	0.00131741	0.0301352	0.00268978	0.00243445	0	0.00349211	0.037591	0.0442326	0.00201555	0.0399285	0.00131741	0.0013051	0.0131842	0.0153294	0.00369346	0.00369346	0	0.000942623	0.00201502	0.0171008	0.00928431	0.0170042	0.0183591	0.0268865	0.00268821	0.00437254	0.000942623	0.00243374	0.00130481	0.0504612	0.00349081	0.0300218	0.0108164	0.0136096
Dechloromonas	0.0173276	0.0225958	0.00119384	0.00330115	0.0201235	0.00926097	0.0171263	0.0203856	0.0161387	0.0127809	0.0124037	0.00931229	0.0214805	0.0147442	0.0026874	0.012609	0.0171263	0.0065255	0.0131735	0.00661674	0.0105528	0.0105528	0.0123946	0.0160246	0.00268669	0.0131544	0.011937	0.0188936	0.0183591	0.0179244	0.0161292	0.0201137	0.0160246	0.0127771	0.00652405	0.0242214	0.00930882	0.0203089	0.0143271	0.00536607
Corallococcus	0.00866382	0.0346469	0	0.0181563	0.00524962	0.0148176	0.00790446	0.0248172	0.0107591	0.00365168	0.00826913	0.00582018	0.0241656	0.0294884	0.0026874	0.025218	0.00790446	0.00456785	0.0131549	0.0103671	0.00316583	0.00316583	0.0082631	0.00471311	0.00268669	0.0157853	0.00928431	0.020783	0.0183591	0.0179244	0.0107528	0.00524705	0.00471311	0.00365061	0.00456684	0.018166	0.00581801	0.0247238	0.0100983	0.00720507
Filimonas	0.0108298	0.0286214	0.000596919	0.011554	0.00262481	0.0111132	0.00658705	0.0319078	0.00605201	0.00547752	0.00826913	0.00116404	0.0483312	0.0278501	0.0026874	0.0189135	0.00658705	0.0052204	0.0130215	0.0130466	0.00105528	0.00105528	0.0082631	0.00377049	0.00268669	0.00263089	0.00928431	0.0113362	0.0163192	0.0358487	0.00604847	0.00262352	0.00377049	0.00547592	0.00521924	0.0444059	0.0011636	0.0317878	0.0107081	0.0130603
Yangia	0.00649787	0.0165703	0.00179076	0.0198069	0.0157489	0.0148176	0.0138328	0.0221582	0.0127765	0.00547752	0.0110255	0.00931229	0.0134253	0.0229354	0.00537479	0.0231165	0.0138328	0.00587295	0.0130207	0.00645085	0.00474874	0.00474874	0.0110175	0.0113115	0.00537338	0.0210471	0.00530532	0.0226723	0.020399	0.00896218	0.012769	0.0157411	0.0113115	0.00547592	0.00587165	0.018166	0.00930882	0.0220749	0.0120169	0.00647526
Parolsenella	0.00433191	0.0391661	0.000596919	0.00990344	0	0.00740878	0	0.0345668	0	0.00121723	0.00137819	0.00465614	0.0483312	0.0475091	0	0.033624	0	0.0013051	0.0129997	0.018165	0.00105528	0.00105528	0.00137718	0	0	0.0105235	0.00663165	0.0151149	0.0142793	0.0268865	0	0	0	0.00121687	0.00130481	0.0383505	0.00465441	0.0344368	0.00871595	0.0124338
Nitratireductor	0.00649787	0.0210894	0	0.011554	0.00612456	0.00926097	0.00658705	0.0407711	0.00605201	0.00973781	0.00551276	0.0104763	0.0322208	0.0229354	0.00201555	0.0315225	0.00658705	0.00456785	0.0129729	0.0116767	0.00316583	0.00316583	0.00550873	0.00754098	0.00201502	0.0131544	0.00795798	0.0151149	0.0061197	0	0.00604847	0.00612156	0.00754098	0.00973497	0.00456684	0.0201845	0.0104724	0.0406177	0.0093906	0.00920272
Leclercia	0.0151617	0.0376597	0.000596919	0.0132046	0.00174987	0.0148176	0.00724576	0.0301352	0.0100867	0.00365168	0.00964732	0.00349211	0.0241656	0.0278501	0.00403109	0.016812	0.00724576	0.00587295	0.0129681	0.0106959	0.0131909	0.0131909	0.0137718	0.0160246	0.00470171	0.87477	0.655207	0.778416	0.587491	0.0268865	0.013441	0.0166157	0.0160246	0.00973497	0.00978608	0.0242214	0.0162904	0.0397347	0.173861	0.307396
Roseomonas	0.00649787	0.019583	0	0.0198069	0.00349975	0.0148176	0.00526964	0.0257035	0.0100867	0.00669474	0.00275638	0.00698422	0.0268507	0.0376796	0.00537479	0.0231165	0.00526964	0.013051	0.0129468	0.0103643	0.00633165	0.00633165	0.00275437	0.00565574	0.00537338	0.0184162	0.00530532	0.0151149	0.0163192	0.00896218	0.0100808	0.00349803	0.00565574	0.00669279	0.0130481	0.018166	0.00698162	0.0256068	0.0100164	0.00632679
Heliobacterium	0.00216596	0.0361533	0.000596919	0.00660229	0	0.00555658	0.00131741	0.0354531	0	0.00182584	0.00137819	0.00116404	0.0322208	0.0589768	0.000671849	0.0462331	0.00131741	0.0013051	0.012941	0.0192433	0.00105528	0.00105528	0.00137718	0	0.000671673	0.0131544	0.011937	0.00755744	0.0081596	0.0268865	0	0	0	0.00182531	0.00130481	0.0322952	0.0011636	0.0353198	0.00798684	0.0116703
Lelliottia	0.0129957	0.0225958	0.000596919	0.0181563	0.0096243	0.0166698	0.017785	0.0221582	0.00672445	0.00730336	0.00689094	0.00232807	0.0295358	0.0180207	0.0026874	0.016812	0.017785	0.0039153	0.0129214	0.00823199	0.0126633	0.0126633	0.030298	0.0188525	0.00403004	0.26572	0.127328	0.430774	0.130554	0.0179244	0.0161292	0.0218627	0.0188525	0.0121687	0.00978608	0.0524797	0.011636	0.0273728	0.0678386	0.112066
Borreliella	0.00866382	0.0150639	0.000596919	0.0165057	0.00262481	0.0129654	0.00724576	0.0345668	0.00134489	0.00304307	0.00826913	0.00232807	0.040276	0.0327649	0.0013437	0.033624	0.00724576	0.0039153	0.0129104	0.0132347	0.00263819	0.00263819	0.0082631	0.00188525	0.00134335	0.0249934	0.00795798	0.0170042	0.020399	0.0268865	0.0013441	0.00262352	0.00188525	0.00304218	0.00391443	0.040369	0.00232721	0.0344368	0.0113306	0.01272
Fervidobacterium	0.00216596	0.0316341	0	0.0165057	0.00174987	0.0111132	0.00263482	0.0363395	0	0.00243445	0.00413457	0.00349211	0.037591	0.0589768	0	0.0189135	0.00263482	0.00195765	0.0129043	0.0172005	0.00158291	0.00158291	0.00413155	0	0	0.0105235	0.00265266	0.0151149	0.0081596	0.0268865	0	0.00174902	0	0.00243374	0.00195722	0.0666088	0.00349081	0.0362028	0.0101709	0.0172662
Megasphaera	0	0.0376597	0.00119384	0.00660229	0.00349975	0.00740878	0.000658705	0.0372258	0	0.00304307	0.00137819	0.00232807	0.0429611	0.0393178	0.00201555	0.0441316	0.000658705	0.00195765	0.0128911	0.0176392	0.00738693	0.00738693	0.00964028	0.00565574	0.00604506	0.0289398	0.0344846	0.0510127	0.0734364	0.143395	0.00201616	0.00524705	0.00565574	0.00547592	0.00456684	0.16955	0.00581801	0.119204	0.0380509	0.0530803
Plantactinospora	0.00866382	0.0241022	0.00119384	0.0132046	0.00612456	0.0111132	0.00658705	0.0301352	0.00403467	0.00608613	0.00551276	0.00465614	0.0322208	0.0360413	0.0013437	0.025218	0.00658705	0.0091357	0.0128867	0.0112779	0.00211055	0.00211055	0.00550873	0.00282787	0.00134335	0.0289398	0.019895	0.0358978	0.0265187	0.0179244	0.00403231	0.00612156	0.00282787	0.00608435	0.00913367	0.0282583	0.00465441	0.0300218	0.0130117	0.0120092
Kosakonia	0.0173276	0.0210894	0.00119384	0.0132046	0.00174987	0.0148176	0.0131741	0.0274762	0.00874179	0.0048689	0.0179165	0	0.040276	0.0196589	0.00335924	0.00840601	0.0131741	0.0052204	0.0128697	0.0102987	0.017412	0.017412	0.0426927	0.0367623	0.0107468	0.203894	0.149875	0.566808	0.475297	0.0627353	0.0188175	0.0218627	0.0367623	0.0146024	0.00456684	0.0484428	0.0197812	0.874164	0.145702	0.243291
Nonomuraea	0.0129957	0.0256086	0.00238767	0.023108	0.0122491	0.0185219	0.00461094	0.0186129	0.0154662	0.00791197	0.00551276	0.0128044	0.0214805	0.0229354	0.00403109	0.012609	0.00461094	0.0052204	0.0128154	0.00757816	0.00685929	0.00685929	0.00550873	0.00377049	0.00403004	0.0210471	0.0145896	0.0245617	0.0224389	0	0.0154572	0.0122431	0.00377049	0.00790966	0.00521924	0.0222029	0.0127996	0.0185429	0.011545	0.00771487
Rathayibacter	0.0173276	0.027115	0	0.0264092	0.00874937	0.0222263	0.00526964	0.0381121	0.00672445	0.00304307	0.00551276	0.00814825	0.0187955	0.0114677	0.00335924	0.0189135	0.00526964	0.0039153	0.0127977	0.0105269	0.00474874	0.00474874	0.00550873	0.00282787	0.00335836	0.0105235	0.00795798	0.0321191	0.0163192	0.00896218	0.00672052	0.00874508	0.00282787	0.00304218	0.00391443	0.0201845	0.00814522	0.0379688	0.0104791	0.0101172
Thermotoga	0.00433191	0.0180766	0	0.0148552	0.000874937	0.0111132	0.00197612	0.0327942	0.00201734	0.00121723	0.00551276	0.00232807	0.0483312	0.0442326	0.0026874	0.033624	0.00197612	0.0026102	0.0126977	0.0159963	0.00263819	0.00263819	0.00550873	0	0.00268669	0.011839	0.00530532	0.0132255	0.0224389	0.0537731	0.00201616	0.000874508	0	0.00121687	0.00260962	0.0383505	0.00232721	0.0326708	0.0111177	0.0155706
Candidatus Arthromitus	0.00433191	0.027115	0	0.0165057	0.00262481	0.0111132	0.000658705	0.0336805	0.000672445	0.000608613	0.00551276	0.00116404	0.0483312	0.0442326	0.0013437	0.0273195	0.000658705	0.0026102	0.0126935	0.0162187	0.00211055	0.00211055	0.00550873	0.00188525	0.00134335	0.0157853	0.00530532	0.0188936	0.020399	0.0358487	0.000672052	0.00262352	0.00188525	0.000608435	0.00260962	0.058535	0.0011636	0.0335538	0.0117134	0.0162374
Opitutus	0.00866382	0.0286214	0.00119384	0.034662	0.00262481	0.0240785	0.00263482	0.0310215	0.00201734	0.00304307	0.00275638	0.00465614	0.0214805	0.0294884	0.00335924	0.021015	0.00263482	0.00326275	0.012623	0.0124358	0.000527638	0.000527638	0.00275437	0.00188525	0.00335836	0.0197316	0.015916	0.0415659	0.0428379	0.0179244	0.00201616	0.00262352	0.00188525	0.00304218	0.00326203	0.0383505	0.00465441	0.0309048	0.0129871	0.015331
Pasteurella	0.00649787	0.0286214	0.000596919	0.0148552	0.00787443	0.0111132	0.00197612	0.0265899	0.00537956	0.00304307	0.00826913	0.00349211	0.040276	0.0294884	0.000671849	0.033624	0.00197612	0.0026102	0.0126086	0.0129921	0.00474874	0.00474874	0.0082631	0.00377049	0.000671673	0.00657722	0.00265266	0.0188936	0.0122394	0.0537731	0.00537642	0.00787057	0.00377049	0.00304218	0.00260962	0.0444059	0.00349081	0.0264898	0.0118552	0.0150562
Olleya	0.0173276	0.0256086	0.000596919	0.011554	0.00174987	0.0148176	0.00856317	0.0265899	0.00605201	0.00426029	0.0165383	0.00582018	0.0268507	0.0229354	0.00201555	0.0231165	0.00856317	0.00326275	0.0125679	0.0093346	0.00263819	0.00263819	0.0165262	0.000942623	0.00201502	0.0184162	0.0145896	0.00755744	0.0061197	0.0627353	0.00604847	0.00174902	0.000942623	0.00425905	0.00326203	0.040369	0.00581801	0.0264898	0.0123954	0.0163477
Filifactor	0	0.0331405	0.00179076	0.00825287	0.00262481	0.00926097	0.00461094	0.0283625	0.000672445	0.00182584	0.00551276	0.00465614	0.0456462	0.0376796	0.00335924	0.0315225	0.00461094	0.0026102	0.0125633	0.0150276	0.0042211	0.0042211	0.00550873	0	0.00335836	0.00394633	0.00397899	0.00755744	0	0.0627353	0.000672052	0.00262352	0	0.00182531	0.00260962	0.0504612	0.00465441	0.0282558	0.0103683	0.018069
Gemmata	0.00649787	0.00903832	0.00119384	0.0396138	0.00174987	0.0259307	0.00131741	0.0212719	0.00537956	0.00608613	0.00413457	0.00465614	0.0322208	0.0344031	0.000671849	0.0273195	0.00131741	0.00326275	0.0125592	0.01344	0.000527638	0.000527638	0.00413155	0.00282787	0.000671673	0.0249934	0.015916	0.0226723	0.0469177	0.00896218	0.00537642	0.00174902	0.00282787	0.00608435	0.00326203	0.0302767	0.00465441	0.0211919	0.0113095	0.0129988
Roseiflexus	0.00866382	0.0225958	0	0.0280598	0	0.0203741	0.00263482	0.0248172	0.00134489	0.00182584	0.00551276	0.00232807	0.040276	0.0327649	0.0013437	0.029421	0.00263482	0.0013051	0.0125501	0.0136952	0.00158291	0.00158291	0.00550873	0.00377049	0.00134335	0.00657722	0.0106106	0.0188936	0.0101995	0.0268865	0.0013441	0	0.00377049	0.00182531	0.00130481	0.0322952	0.00232721	0.0247238	0.00858593	0.0101312
Desulfatibacillum	0.00216596	0.0256086	0	0.023108	0	0.0148176	0.00131741	0.0398848	0.000672445	0.00182584	0.00137819	0.00116404	0.0187955	0.0622532	0.000671849	0.029421	0.00131741	0	0.0124668	0.0176778	0.00316583	0.00316583	0.00137718	0.00188525	0.000671673	0.00526177	0.00530532	0.0132255	0.0142793	0.0627353	0.000672052	0	0.00188525	0.00182531	0	0.0645904	0.0011636	0.0397347	0.0122747	0.0209253
Photorhabdus	0.0129957	0.0210894	0.00119384	0.00990344	0.00524962	0.0111132	0.00988058	0.0177266	0.00336223	0.00791197	0.0275638	0.00116404	0.0295358	0.0278501	0.00201555	0.0231165	0.00988058	0.0026102	0.0124535	0.00973273	0.00474874	0.00474874	0.0275437	0.00754098	0.00201502	0.0105235	0.011937	0.0170042	0.0224389	0.0268865	0.00336026	0.00524705	0.00754098	0.00790966	0.00260962	0.0484428	0.0011636	0.0176599	0.0127401	0.0122159
Symbiobacterium	0.00216596	0.0331405	0.000596919	0.0198069	0.000874937	0.0129654	0	0.0319078	0.00470712	0.00121723	0.00275638	0.00232807	0.037591	0.0376796	0.0013437	0.033624	0	0.0013051	0.012445	0.0151432	0.00211055	0.00211055	0.00275437	0	0.00134335	0.0144699	0.00795798	0.0170042	0.0081596	0.0627353	0.00470436	0.000874508	0	0.00121687	0.00130481	0.0363321	0.00232721	0.0317878	0.0109552	0.0167756
Cutibacterium	0.00433191	0.0256086	0.000596919	0.00990344	0.00174987	0.00740878	0.00131741	0.0345668	0.00605201	0.00182584	0.00275638	0.00232807	0.0322208	0.0409561	0	0.0483346	0.00131741	0.0013051	0.0123656	0.0160577	0.00211055	0.00211055	0.00275437	0	0	0.0171008	0.00795798	0.0132255	0.0142793	0.0358487	0.00604847	0.00174902	0	0.00182531	0.00130481	0.0262398	0.00232721	0.0344368	0.00940662	0.0118023
Microcystis	0.00649787	0.0241022	0	0.0132046	0.00524962	0.0111132	0.00461094	0.0257035	0.00605201	0.0048689	0.00275638	0.0104763	0.0510163	0.0294884	0.0026874	0.0189135	0.00461094	0.00065255	0.0123336	0.0131259	0.00316583	0.00316583	0.00275437	0.00377049	0.00268669	0.0144699	0.0132633	0.0151149	0.0081596	0.0448109	0.00604847	0.00524705	0.00377049	0.00486748	0.000652405	0.0302767	0.0104724	0.0256068	0.0110169	0.0117254
Sporanaerobacter	0.0151617	0.0241022	0.00358151	0.00825287	0.00612456	0.0111132	0.00131741	0.0310215	0.000672445	0.00791197	0.00826913	0.00698422	0.040276	0.0294884	0.00806219	0.012609	0.00131741	0.0052204	0.0123048	0.0114182	0.0100251	0.0100251	0.0082631	0.000942623	0.00806007	0.0092081	0.00530532	0.0113362	0.0020399	0.0448109	0.000672052	0.00612156	0.000942623	0.00790966	0.00521924	0.0666088	0.00698162	0.0309048	0.0130765	0.0172866
Aquaspirillum	0.0129957	0.00301277	0.00298459	0.00495172	0.0349975	0.00926097	0.0197612	0.00974961	0.0282427	0.0121723	0.0165383	0.0151325	0.00537014	0.00819122	0.0107496	0.00420301	0.0197612	0.00326275	0.0122965	0.00895898	0.0179397	0.0179397	0.0165262	0.0169672	0.0107468	0.011839	0.00928431	0.0094468	0.0163192	0.0179244	0.0282262	0.0349803	0.0169672	0.0121687	0.00326203	0.0121107	0.0151268	0.00971294	0.015416	0.00720448
Candidatus Planktophila	0.00216596	0.0241022	0.000596919	0.0198069	0.00174987	0.0129654	0.00197612	0.0301352	0	0.00121723	0.00137819	0	0.037591	0.0376796	0.00201555	0.037827	0.00197612	0.0065255	0.012206	0.0147476	0.00158291	0.00158291	0.00137718	0.000942623	0.00201502	0.0092081	0.00795798	0.00377872	0.0040798	0.0537731	0	0.00174902	0.000942623	0.00121687	0.00652405	0.0423874	0	0.0300218	0.00939667	0.0157911
Luteimonas	0.0108298	0.019583	0.000596919	0.0165057	0.0096243	0.0148176	0.00329353	0.0194992	0.0114316	0.00608613	0.00689094	0.00814825	0.0295358	0.0327649	0.00335924	0.016812	0.00329353	0.0065255	0.0121999	0.00898566	0.0416834	0.0416834	0.0482014	0.0282787	0.0141051	0.0420942	0.0968221	0.0491233	0.0367182	0.00896218	0.103496	0.0454744	0.0282787	0.0480664	0.0189197	0.0363321	0.0372353	0.0768205	0.044572	0.0252988
Gottschalkia	0	0.0241022	0.00179076	0.00495172	0.0096243	0.00555658	0.00395223	0.0257035	0.000672445	0.00426029	0.00275638	0.0128044	0.0483312	0.0294884	0.00335924	0.0315225	0.00395223	0.0065255	0.0121863	0.0137072	0.00738693	0.00738693	0.00275437	0.00377049	0.00335836	0.00263089	0.00795798	0.0151149	0.0081596	0.0896218	0.000672052	0.00961959	0.00377049	0.00425905	0.00652405	0.0343136	0.0127996	0.0256068	0.0136504	0.0207937
Asticcacaulis	0.0194936	0.0180766	0.000596919	0.0132046	0.000874937	0.0166698	0.00329353	0.0301352	0.00874179	0.0121723	0.00413457	0.00465614	0.0295358	0.0294884	0.00201555	0.0189135	0.00329353	0.0039153	0.0121784	0.0102976	0.00105528	0.00105528	0.00413155	0.00471311	0.00201502	0.011839	0.00530532	0.0151149	0.0224389	0.0179244	0.00873668	0.000874508	0.00471311	0.0121687	0.00391443	0.0383505	0.00465441	0.0300218	0.0105015	0.0106785
Acetoanaerobium	0.00433191	0.019583	0.00119384	0.00825287	0.00262481	0.00740878	0.00197612	0.0283625	0	0.00121723	0.00137819	0.00814825	0.0483312	0.0425943	0.0026874	0.0357255	0.00197612	0.00326275	0.0121697	0.0157071	0.00158291	0.00158291	0.00137718	0	0.00268669	0.0092081	0.00663165	0.00566808	0.0061197	0.0179244	0	0.00262352	0	0.00121687	0.00326203	0.0383505	0.00814522	0.0282558	0.00747975	0.0105195
Methylomusa	0	0.0361533	0.00179076	0.0148552	0	0.0166698	0.00263482	0.0283625	0	0	0	0.00349211	0.0268507	0.0442326	0.000671849	0.0399285	0.00263482	0	0.0121265	0.0158386	0.00738693	0.00738693	0	0	0.000671673	0.0131544	0.00132633	0.0094468	0.0081596	0.0448109	0	0	0	0	0	0.0322952	0.00349081	0.0282558	0.00868808	0.0131576
Rhodovulum	0.0194936	0.0225958	0	0.023108	0.00524962	0.0222263	0.00592835	0.0239309	0.00537956	0.00608613	0.00275638	0.00349211	0.0268507	0.0114677	0.00403109	0.0231165	0.00592835	0.0065255	0.0121204	0.00931881	0.00316583	0.00316583	0.00275437	0.00282787	0.00403004	0.0171008	0.0225476	0.0170042	0.0244788	0.0358487	0.00537642	0.00524705	0.00282787	0.00608435	0.00652405	0.0161476	0.00349081	0.0238408	0.0112479	0.0101002
Pseudolabrys	0.00433191	0.0105447	0.00119384	0.00990344	0.013999	0.00740878	0.00790446	0.0354531	0.0141213	0.0091292	0.00551276	0.00465614	0.0483312	0.00982946	0.00335924	0.0147105	0.00790446	0.00848315	0.0120432	0.0116784	0.00474874	0.00474874	0.00550873	0.00754098	0.00335836	0.00131544	0.0172423	0.020783	0.0081596	0.00896218	0.0141131	0.0139921	0.00754098	0.00912653	0.00848127	0.018166	0.00465441	0.0353198	0.0107646	0.00819573
Desulfofarcimen	0.00433191	0.0331405	0	0.00825287	0.00174987	0.00740878	0.00197612	0.0230445	0.000672445	0	0.00551276	0.00232807	0.0456462	0.0393178	0	0.0399285	0.00197612	0.0013051	0.0120329	0.0161564	0.00158291	0.00158291	0.00550873	0.000942623	0	0.00263089	0.00132633	0.00566808	0.0061197	0	0.000672052	0.00174902	0.000942623	0	0.00130481	0.040369	0.00232721	0.0229579	0.00531582	0.0102156
Fluviicola	0.0129957	0.027115	0	0.00990344	0	0.0111132	0.00526964	0.0248172	0.00201734	0.00608613	0.0248074	0.00582018	0.0241656	0.0311266	0.0013437	0.021015	0.00526964	0.00326275	0.0120071	0.0105701	0.000527638	0.000527638	0.0247893	0.00188525	0.00134335	0.0105235	0.00530532	0.00755744	0.0040798	0.0358487	0.00201616	0	0.00188525	0.00608435	0.00326203	0.0282583	0.00581801	0.0247238	0.00913533	0.0111539
Zobellella	0.00649787	0.0210894	0.000596919	0.011554	0.013124	0.00926097	0.00658705	0.0248172	0.0141213	0.00730336	0.00413457	0.00349211	0.0295358	0.0278501	0.00537479	0.021015	0.00658705	0.0026102	0.0119751	0.00909953	0.00633165	0.00633165	0.00413155	0.00659836	0.00537338	0.0105235	0.0212213	0.0113362	0.0122394	0	0.0141131	0.0131176	0.00659836	0.00730122	0.00260962	0.018166	0.00349081	0.0247238	0.0096782	0.00664836
Ferrimonas	0.00866382	0.0165703	0.00238767	0.00495172	0.00874937	0.00740878	0.022396	0.0168402	0.0154662	0.00426029	0.00689094	0.00116404	0.0268507	0.0245736	0.00604664	0.0189135	0.022396	0.00065255	0.0119546	0.0085796	0.0100251	0.0100251	0.00688591	0.0103688	0.00604506	0.00394633	0.0145896	0.00377872	0.0040798	0.00896218	0.0154572	0.00874508	0.0103688	0.00425905	0.000652405	0.0302767	0.0011636	0.0167769	0.00924481	0.00700728
Turicibacter	0.00433191	0.019583	0.00119384	0.00330115	0.00437468	0.00370439	0.00263482	0.0381121	0	0	0.00413457	0.00349211	0.037591	0.0458708	0.00201555	0.037827	0.00263482	0.00326275	0.0118925	0.0160151	0.00105528	0.00105528	0.00413155	0.00377049	0.00201502	0.0092081	0.00397899	0.0094468	0.0040798	0.0537731	0	0.00437254	0.00377049	0	0.00326203	0.0383505	0.00349081	0.0379688	0.0102072	0.0157719
Jonesia	0.00866382	0.0241022	0.00179076	0.0165057	0.00524962	0.0129654	0.00658705	0.0283625	0.0073969	0.00852058	0.00964732	0	0.0241656	0.0212972	0.00470294	0.0189135	0.00658705	0.0078306	0.0118494	0.00836746	0.00105528	0.00105528	0	0	0	0.00394633	0.00530532	0	0.0020399	0	0	0.00174902	0	0.000608435	0	0.0121107	0	0.00618096	0.00189173	0.00319922
Peptoclostridium	0	0.0316341	0.00179076	0.00495172	0.00174987	0.00555658	0.00592835	0.0292488	0	0.00426029	0.00413457	0.00465614	0.0214805	0.0475091	0.00201555	0.037827	0.00592835	0.00456785	0.0118466	0.0147394	0.00369346	0.00369346	0.00413155	0.00188525	0.00201502	0.00526177	0.00132633	0.00188936	0.0061197	0.0806596	0	0.00174902	0.00188525	0.00425905	0.00456684	0.040369	0.00465441	0.0291388	0.010961	0.0203091
Owenweeksia	0.00433191	0.0361533	0.00238767	0.00825287	0.00262481	0.00740878	0.00395223	0.0283625	0	0.00547752	0.0110255	0.00232807	0.0349059	0.0311266	0.0013437	0.025218	0.00395223	0.0039153	0.0118204	0.0127866	0.00158291	0.00158291	0.0110175	0.00659836	0.00134335	0	0	0.00755744	0.0061197	0.0358487	0	0.00262352	0.00659836	0.00547592	0.00391443	0.0262398	0.00232721	0.0282558	0.00817144	0.010676
Spirochaeta	0.00866382	0.019583	0.000596919	0.0214575	0.00174987	0.0166698	0	0.0221582	0	0	0.00137819	0	0.037591	0.0507855	0.0013437	0.0273195	0	0.00326275	0.0118089	0.0152125	0	0	0.00137718	0	0.00134335	0.0157853	0.011937	0.026451	0.020399	0.0537731	0	0.00174902	0	0	0.00326203	0.0645904	0	0.0220749	0.0123746	0.0192801
Candidatus Methylopumilus	0.00216596	0.0165703	0.000596919	0.00825287	0.00699949	0.00555658	0.00658705	0.0168402	0.00874179	0.00243445	0.028942	0.0116404	0.0134253	0.0327649	0.00201555	0.0399285	0.00658705	0.00195765	0.0117782	0.0114078	0.00738693	0.00738693	0.0289208	0.0084836	0.00201502	0.0157853	0.00663165	0.00377872	0.0122394	0.0358487	0.00873668	0.00699606	0.0084836	0.00243374	0.00195722	0.0504612	0.011636	0.0167769	0.0131088	0.0129274
Chloroflexus	0.00216596	0.0210894	0.000596919	0.0165057	0.00874937	0.0111132	0.0151502	0.0177266	0.00537956	0.00243445	0.00689094	0.00349211	0.0349059	0.0131059	0.00671849	0.0273195	0.0151502	0.00326275	0.0117643	0.00936606	0.00527638	0.00527638	0.00688591	0.0141393	0.00671673	0.0092081	0.00530532	0.00755744	0.0061197	0.0268865	0.00537642	0.00874508	0.0141393	0.00243374	0.00326203	0.0282583	0.00349081	0.0176599	0.00981875	0.00762208
Marinilactibacillus	0.0108298	0.0210894	0.000596919	0.00165057	0.00262481	0.00555658	0.00856317	0.0319078	0.00470712	0.00608613	0.022051	0.00232807	0.0295358	0.0294884	0.00671849	0.0147105	0.00856317	0.00456785	0.0117542	0.0104486	0.00105528	0.00105528	0.00275437	0.000942623	0.00134335	0.00394633	0.00132633	0.00566808	0.0101995	0.0358487	0.000672052	0.00174902	0.000942623	0	0.00195722	0.0242214	0.00232721	0.0105959	0.00592252	0.00949412
Belliella	0.00649787	0.0225958	0.00119384	0.00495172	0	0.00555658	0.00395223	0.0212719	0.00403467	0.00730336	0.0344547	0.00465614	0.0349059	0.0229354	0.00335924	0.0273195	0.00395223	0.0026102	0.0117529	0.0118678	0	0	0.0344296	0.00659836	0.00335836	0.00263089	0.00928431	0.00566808	0.0020399	0.00896218	0.00403231	0	0.00659836	0.00730122	0.00260962	0.0262398	0.00465441	0.0211919	0.00808885	0.00955299
Granulicella	0.00433191	0.0376597	0.000596919	0.0363126	0.00174987	0.0222263	0.000658705	0.0257035	0.00134489	0.00243445	0.00275638	0.00232807	0.0241656	0.0212972	0	0.025218	0.000658705	0.00195765	0.0117445	0.0135687	0.00158291	0.00158291	0.00275437	0	0	0.0092081	0.0132633	0.0170042	0.0142793	0.0448109	0.0013441	0.00174902	0	0.00243374	0.00195722	0.0302767	0.00232721	0.0256068	0.00945449	0.0127367
Croceibacter	0.0151617	0.0331405	0.000596919	0.00495172	0	0.00926097	0.00329353	0.0283625	0.00403467	0.00182584	0.00826913	0.00465614	0.0241656	0.0327649	0.00403109	0.0315225	0.00329353	0.00195765	0.0117383	0.0122851	0.00316583	0.00316583	0.0082631	0.00188525	0.00403004	0.00526177	0.0106106	0.00188936	0.0040798	0.00896218	0.00403231	0	0.00188525	0.00182531	0.00195722	0.0363321	0.00465441	0.0282558	0.00723645	0.0096204
Pelodictyon	0.0129957	0.0241022	0	0.0165057	0.00174987	0.0148176	0.00131741	0.0283625	0.00537956	0.00182584	0.00551276	0.00232807	0.0241656	0.0409561	0.000671849	0.0273195	0.00131741	0.00065255	0.0116656	0.0125556	0.000527638	0.000527638	0.00550873	0.000942623	0.000671673	0.00394633	0.0132633	0.00566808	0.0142793	0.0179244	0.00537642	0.00174902	0.000942623	0.00182531	0.000652405	0.0363321	0.00232721	0.0282558	0.00781781	0.0104074
Sodalis	0.00649787	0.0210894	0.00238767	0.00990344	0.0157489	0.00926097	0.0118567	0.0186129	0.00605201	0.00791197	0.00689094	0.00931229	0.0268507	0.0196589	0.00403109	0.016812	0.0118567	0.0052204	0.0116642	0.00673106	0.00633165	0.00633165	0.00688591	0.00565574	0.00403004	0.00789266	0.015916	0.0151149	0.0122394	0.0179244	0.00604847	0.0157411	0.00565574	0.00790966	0.00521924	0.0282583	0.00930882	0.0185429	0.0108337	0.00647857
Sebaldella	0.00433191	0.027115	0.00179076	0.00990344	0.00174987	0.00740878	0.00197612	0.0265899	0.000672445	0.00182584	0.00413457	0	0.040276	0.0360413	0.00335924	0.0399285	0.00197612	0.00065255	0.0116518	0.0148171	0.00158291	0.00158291	0.00413155	0	0.00335836	0.00526177	0.00265266	0.0113362	0.0061197	0.00896218	0.000672052	0.00174902	0	0.00182531	0.000652405	0.0302767	0	0.0264898	0.0059252	0.00877188
Soehngenia	0	0.027115	0.000596919	0.0148552	0.00174987	0.0166698	0.00329353	0.0265899	0.000672445	0.00304307	0.00413457	0.00232807	0.0537014	0.0262119	0.00201555	0.021015	0.00329353	0.00195765	0.0116246	0.0145242	0.00158291	0.00158291	0.00413155	0.00188525	0.00201502	0.00526177	0.00663165	0.00755744	0.0061197	0.0358487	0.000672052	0.00174902	0.00188525	0.00304218	0.00195722	0.0504612	0.00232721	0.0264898	0.0089556	0.0139558
Sutterella	0.00866382	0.0225958	0.000596919	0.0214575	0.00787443	0.0166698	0.00329353	0.0194992	0.00672445	0.00304307	0.00551276	0.00582018	0.0295358	0.0262119	0	0.025218	0.00329353	0.0026102	0.01159	0.00997414	0.00369346	0.00369346	0.00550873	0.00282787	0	0.0171008	0.015916	0.0132255	0.0305985	0.00896218	0.00672052	0.00787057	0.00282787	0.00304218	0.00260962	0.0242214	0.00581801	0.0194259	0.00967014	0.0085706
Desulfallas	0.00216596	0.0316341	0	0.011554	0.00174987	0.00740878	0.00131741	0.0301352	0.00201734	0.000608613	0.00137819	0.00465614	0.040276	0.0475091	0.00201555	0.021015	0.00131741	0.0013051	0.0115591	0.0154503	0.00580401	0.00580401	0.00137718	0.000942623	0.00201502	0.00789266	0	0.0113362	0.0061197	0.0268865	0.00201616	0.00174902	0.000942623	0.000608435	0.00130481	0.0302767	0.00465441	0.0300218	0.00776399	0.0102615
Gloeothece	0.00866382	0.0225958	0.00119384	0.0297103	0.00612456	0.0203741	0.00263482	0.0203856	0.000672445	0.00121723	0	0.00465614	0.0268507	0.0212972	0.0013437	0.033624	0.00263482	0.0013051	0.0114047	0.0117395	0.00211055	0.00211055	0	0.000942623	0.00134335	0.0144699	0.0185686	0.0283404	0.0224389	0.0268865	0.000672052	0.00612156	0.000942623	0.00121687	0.00130481	0.0302767	0.00465441	0.0203089	0.0101505	0.0112028
Dietzia	0.0108298	0.0241022	0.00298459	0.0181563	0.00437468	0.0148176	0.00592835	0.0292488	0.00268978	0.00243445	0.0110255	0.00232807	0.0214805	0.0196589	0	0.016812	0.00592835	0.00978825	0.0112549	0.008703	0.00369346	0.00369346	0.0110175	0.00471311	0	0.0276243	0.015916	0.0245617	0.0346783	0	0.00268821	0.00437254	0.00471311	0.00243374	0.00978608	0.0262398	0.00232721	0.0291388	0.0115332	0.0116118
Hathewaya	0	0.027115	0.00119384	0.00825287	0.00524962	0.00926097	0.00526964	0.0283625	0.00134489	0.00182584	0.00137819	0.00349211	0.0322208	0.0376796	0.0026874	0.025218	0.00526964	0.00456785	0.0111327	0.0125754	0.00738693	0.00738693	0.00137718	0.000942623	0.00268669	0.00789266	0.00265266	0.00377872	0.0020399	0.0716974	0.0013441	0.00524705	0.000942623	0.00182531	0.00456684	0.0484428	0.00349081	0.0282558	0.0112198	0.0192403
Thiomicrorhabdus	0.00649787	0.0150639	0.00119384	0.00495172	0.0113742	0.00555658	0.0105393	0.0203856	0.0100867	0.00304307	0.0275638	0.00931229	0.0241656	0.0131059	0.00403109	0.0189135	0.0105393	0.00326275	0.0110882	0.00758422	0.00474874	0.00474874	0.0275437	0.0169672	0.00403004	0.0105235	0.00530532	0.0151149	0.0101995	0.0179244	0.0100808	0.0113686	0.0169672	0.00304218	0.00326203	0.0121107	0.00930882	0.0203089	0.0113086	0.00678683
Actinosynnema	0.0151617	0.019583	0.00238767	0.011554	0.00787443	0.0129654	0.00790446	0.0194992	0.00605201	0.00730336	0.00826913	0.0116404	0.0107403	0.0245736	0.00470294	0.0147105	0.00790446	0.0052204	0.0110026	0.00587944	0.00369346	0.00369346	0.0082631	0.00659836	0.00470171	0.0249934	0.0132633	0.0132255	0.0142793	0	0.00604847	0.00787057	0.00659836	0.00730122	0.00521924	0.0161476	0.011636	0.0194259	0.00960883	0.0063003
Desulfobacter	0.00216596	0.0286214	0.00179076	0.00990344	0.00174987	0.00740878	0.000658705	0.0301352	0.000672445	0.000608613	0.00826913	0.00349211	0.040276	0.0245736	0.0013437	0.0315225	0.000658705	0.0039153	0.010987	0.0133669	0.00211055	0.00211055	0.0082631	0.000942623	0.00134335	0.00526177	0.00663165	0.00755744	0.0061197	0.0358487	0.000672052	0.00174902	0.000942623	0.000608435	0.00391443	0.0484428	0.00349081	0.0300218	0.00922397	0.0138905
Euzebyella	0.0129957	0.0241022	0.000596919	0.00330115	0.00262481	0.00740878	0.00395223	0.0257035	0.000672445	0.00365168	0.00964732	0.00465614	0.0349059	0.0212972	0.0013437	0.033624	0.00395223	0.0013051	0.0108745	0.011684	0.00158291	0.00158291	0.00964028	0.00377049	0.00134335	0.00789266	0.00530532	0.0113362	0.0163192	0.0537731	0.000672052	0.00262352	0.00377049	0.00365061	0.00130481	0.0383505	0.00465441	0.0256068	0.0107322	0.0145567
Nakamurella	0.00433191	0.0225958	0	0.0198069	0.00612456	0.0129654	0.00395223	0.0203856	0.00605201	0.00304307	0.0151601	0.00349211	0.0241656	0.0163824	0.00335924	0.0273195	0.00395223	0.0026102	0.0108722	0.00891505	0.00211055	0.00211055	0.015149	0.000942623	0.00335836	0.0171008	0.00795798	0.0151149	0.0224389	0.00896218	0.00604847	0.00612156	0.000942623	0.00304218	0.00260962	0.0262398	0.00349081	0.0203089	0.00911388	0.00814452
Tamlana	0.0108298	0.0150639	0	0.00660229	0.00174987	0.00926097	0.00724576	0.0186129	0.00403467	0.00547752	0.00826913	0.00232807	0.0429611	0.0311266	0.00335924	0.016812	0.00724576	0.00456785	0.0108637	0.0109895	0.00105528	0.00105528	0.0082631	0.00471311	0.00335836	0.0105235	0.00795798	0.0132255	0.0061197	0.0358487	0.00403231	0.00174902	0.00471311	0.00547592	0.00456684	0.040369	0.00232721	0.0185429	0.00966094	0.0112899
Lawsonella	0.00866382	0.0135575	0.00119384	0.00825287	0.0096243	0.00926097	0.0118567	0.0186129	0.0073969	0.00852058	0.00413457	0.0104763	0.0134253	0.0180207	0.00335924	0.0315225	0.0118567	0.0052204	0.0108309	0.00692057	0.000527638	0.000527638	0	0	0	0.00526177	0.00132633	0.00566808	0.0020399	0.0448109	0.000672052	0	0	0	0	0.0141291	0	0.00882994	0.00465519	0.0107438
Arenibacter	0.00866382	0.0180766	0.000596919	0.0132046	0.00524962	0.0111132	0.00526964	0.0221582	0.00470712	0.00243445	0.0124037	0	0.0295358	0.0196589	0.0013437	0.0273195	0.00526964	0.0065255	0.0107517	0.00915505	0.00316583	0.00316583	0.0123946	0.00471311	0.00134335	0.00526177	0.00663165	0.00566808	0.0101995	0.00896218	0.00470436	0.00524705	0.00471311	0.00243374	0.00652405	0.0201845	0	0.0220749	0.00707709	0.00593779
Flavivirga	0.00649787	0.0150639	0.000596919	0.011554	0.00174987	0.00926097	0.00461094	0.0274762	0.00403467	0.00243445	0.0192946	0.00232807	0.0241656	0.0278501	0.00537479	0.025218	0.00461094	0.0013051	0.0107459	0.0098123	0.00263819	0.00263819	0.0192806	0.00282787	0.00537338	0.00526177	0.0132633	0.00188936	0.0081596	0.0179244	0.00403231	0.00174902	0.00282787	0.00243374	0.00130481	0.0201845	0.00232721	0.0273728	0.00786049	0.00805289
Cytophaga	0.00216596	0.0256086	0.000596919	0.00990344	0.00349975	0.00740878	0.00790446	0.0274762	0.00605201	0.00304307	0.00826913	0.00232807	0.0322208	0.0245736	0.000671849	0.021015	0.00790446	0.0026102	0.0107362	0.0104087	0.00211055	0.00211055	0.0082631	0.00377049	0.000671673	0.00394633	0.00397899	0.0151149	0.0061197	0.0448109	0.00604847	0.00349803	0.00377049	0.00304218	0.00260962	0.0322952	0.00232721	0.0273728	0.00954784	0.0124453
Methylovorus	0.0108298	0.00753194	0	0.00495172	0.0157489	0.00740878	0.00988058	0.0168402	0.0154662	0.00791197	0.0165383	0.00931229	0.0161104	0.0180207	0.00537479	0.016812	0.00988058	0.00456785	0.0107326	0.0053447	0.00949748	0.00949748	0.0165262	0.0197951	0.00537338	0.00657722	0.00530532	0.00566808	0.0101995	0.00896218	0.0154572	0.0157411	0.0197951	0.00790966	0.00456684	0.0141291	0.00930882	0.0167769	0.0111715	0.00511864
Candidatus Phytoplasma	0.00866382	0.00602555	0	0.0198069	0.00349975	0.0148176	0.00329353	0.0203856	0.000672445	0.00243445	0.00275638	0.00465614	0.0295358	0.0344031	0.0013437	0.033624	0.00329353	0.0039153	0.0107293	0.0117321	0.0042211	0.0042211	0.00275437	0.00188525	0.00134335	0.0249934	0.00397899	0.0188936	0.020399	0.0627353	0.000672052	0.00349803	0.00188525	0.00243374	0.00391443	0.0383505	0.00465441	0.0203089	0.0122857	0.0164913
Haliangium	0.0108298	0.0150639	0.00238767	0.0198069	0.00787443	0.0166698	0.00131741	0.0230445	0.00537956	0.00426029	0.00551276	0.00465614	0.0187955	0.0196589	0.00537479	0.021015	0.00131741	0.00978825	0.0107085	0.00750594	0.0042211	0.0042211	0.00550873	0.00282787	0.00537338	0.0210471	0.0132633	0.0170042	0.0305985	0	0.00537642	0.00787057	0.00282787	0.00425905	0.00978608	0.0242214	0.00465441	0.0229579	0.0103344	0.00898667
Acidipropionibacterium	0.00649787	0.027115	0.00119384	0.0264092	0.00174987	0.0185219	0.000658705	0.0239309	0.00268978	0.00182584	0	0	0.0349059	0.0180207	0	0.025218	0.000658705	0.00326275	0.0107033	0.0122095	0.000527638	0.000527638	0	0.00377049	0	0.011839	0.00928431	0.0151149	0.0285586	0.0358487	0.00268821	0.00174902	0.00377049	0.00182531	0.00326203	0.0322952	0	0.0238408	0.0097168	0.0121768
Lautropia	0.00866382	0.0120511	0.000596919	0.00660229	0.0192486	0.00740878	0.00856317	0.0106359	0.0215182	0.00730336	0.00964732	0.0116404	0.0161104	0.0196589	0.00604664	0.0147105	0.00856317	0.00326275	0.0106796	0.00569326	0.0042211	0.0042211	0.00413155	0.0179098	0.00335836	0.0092081	0.00795798	0.00755744	0.0061197	0	0.00739257	0.00961959	0.0179098	0.00851809	0.00521924	0.0161476	0.0104724	0.0185429	0.00880597	0.00549664
Cyanobium	0.00433191	0.0135575	0	0.00990344	0.00349975	0.00740878	0.00790446	0.0274762	0.0073969	0.00365168	0.00275638	0.00465614	0.0295358	0.0393178	0.00335924	0.016812	0.00790446	0.0026102	0.0106713	0.0108851	0.000527638	0.000527638	0.00275437	0.0188525	0.00335836	0.0092081	0.00530532	0.0094468	0.0142793	0.00896218	0.00739257	0.00349803	0.0188525	0.00365061	0.00260962	0.0343136	0.00465441	0.0273728	0.00975368	0.00951659
Halioglobus	0.00866382	0.0210894	0	0.00825287	0.00349975	0.00926097	0	0.0248172	0.00403467	0.00182584	0.0344547	0.00116404	0.0214805	0.0278501	0.0013437	0.021015	0	0.00326275	0.0106675	0.0112531	0.00158291	0.00158291	0.0344296	0	0.00134335	0.00394633	0.011937	0.00755744	0.0081596	0.0537731	0.00403231	0.00349803	0	0.00182531	0.00326203	0.040369	0.0011636	0.0247238	0.0112881	0.0160086
Magnetococcus	0.00433191	0.0165703	0.00119384	0.00990344	0	0.00740878	0.000658705	0.0354531	0	0.00121723	0.00275638	0.00465614	0.0456462	0.0409561	0.000671849	0.0189135	0.000658705	0.00065255	0.0106471	0.0149811	0.00105528	0.00105528	0.00964028	0.00282787	0.000671673	0.00657722	0.00132633	0.00755744	0.0020399	0.00896218	0	0.00524705	0.00282787	0.000608435	0	0.018166	0.00349081	0.00971294	0.00454259	0.00479721
Nitrosococcus	0.00216596	0.0316341	0.00179076	0.00990344	0.00524962	0.00740878	0.00856317	0.0283625	0.00605201	0.0048689	0.00964732	0.00232807	0.0134253	0.0212972	0.00201555	0.025218	0.00856317	0.0026102	0.0106169	0.00955096	0.00369346	0.00369346	0.00964028	0.00942623	0.00201502	0.0092081	0.0106106	0.0113362	0.0061197	0.00896218	0.00604847	0.00524705	0.00942623	0.00486748	0.00260962	0.0201845	0.00232721	0.0282558	0.00853731	0.00659562
Halobacteriovorax	0.00216596	0.0301277	0.00179076	0.0132046	0.00174987	0.00926097	0.000658705	0.0248172	0.00201734	0.000608613	0.00551276	0.00116404	0.0322208	0.0294884	0.0013437	0.033624	0.000658705	0.00065255	0.0106148	0.0129345	0	0	0.00550873	0.00377049	0.00134335	0.00394633	0.00663165	0.0094468	0	0.0716974	0.00201616	0.00174902	0.00377049	0.000608435	0.000652405	0.0282583	0.0011636	0.0247238	0.00918261	0.0175754
Planctomyces	0.00216596	0.0180766	0.000596919	0.0264092	0.00262481	0.0166698	0.00395223	0.0186129	0.00201734	0.00608613	0.00275638	0.00814825	0.0241656	0.0278501	0.0013437	0.021015	0.00395223	0.0039153	0.0105755	0.0097379	0.00263819	0.00263819	0.00275437	0	0.00134335	0.0381479	0.0238739	0.0283404	0.0387581	0	0.00201616	0.00262352	0	0.00608435	0.00391443	0.040369	0.00814522	0.0185429	0.0122328	0.0148789
Atopobium	0.00216596	0.0256086	0	0.0132046	0	0.00926097	0.00197612	0.0354531	0	0	0	0.00232807	0.0322208	0.0344031	0.000671849	0.029421	0.00197612	0.0013051	0.0105553	0.0138794	0.00105528	0.00105528	0	0.00188525	0.000671673	0.00526177	0.00530532	0.0113362	0.0061197	0.0358487	0	0	0.00188525	0	0.00130481	0.0363321	0.00232721	0.0353198	0.0080949	0.0130876
Castellaniella	0.00649787	0.0120511	0.00477535	0.00330115	0.0104992	0.00555658	0.0164676	0.0106359	0.0141213	0.010955	0.0110255	0.0139684	0.0107403	0.00491473	0.00873404	0.00840601	0.0164676	0.020229	0.0105193	0.00458726	0.00949748	0.00949748	0.0110175	0.0122541	0.00873175	0.011839	0.015916	0.00755744	0.0081596	0	0.0141131	0.0104941	0.0122541	0.0109518	0.0202246	0.00807379	0.0139632	0.0105959	0.0108412	0.00413515
Zobellia	0	0.027115	0.00179076	0.0148552	0.000874937	0.0166698	0.00592835	0.0292488	0.00268978	0.00182584	0.0110255	0.00116404	0.0268507	0.0212972	0.00335924	0.0147105	0.00592835	0.0039153	0.0105138	0.0100728	0	0	0.0110175	0.00282787	0.00335836	0.00526177	0.00663165	0.0113362	0.0183591	0.0268865	0.00268821	0.000874508	0.00282787	0.00182531	0.00391443	0.0201845	0.0011636	0.0291388	0.00823867	0.00930368
Anoxybacter	0	0.0241022	0.00119384	0.0132046	0.000874937	0.0148176	0.000658705	0.0274762	0.000672445	0.00121723	0.00413457	0.00698422	0.040276	0.0262119	0.0013437	0.0231165	0.000658705	0.0013051	0.0104582	0.0125534	0.00263819	0.00263819	0.00413155	0.000942623	0.00134335	0.00131544	0.00397899	0.00566808	0.0101995	0.0537731	0.000672052	0.000874508	0.000942623	0.00121687	0.00130481	0.0282583	0.00698162	0.0273728	0.00856959	0.0140564
Zunongwangia	0.00433191	0.0225958	0.00119384	0.00825287	0.000874937	0.00740878	0.00790446	0.0186129	0.00672445	0.0048689	0.0110255	0.00814825	0.0295358	0.0196589	0.00335924	0.016812	0.00790446	0.00848315	0.0104276	0.00786025	0.00474874	0.00474874	0.0110175	0.0103688	0.00335836	0.0105235	0.00663165	0.00755744	0.0101995	0.0268865	0.00672052	0.000874508	0.0103688	0.00486748	0.00848127	0.0343136	0.00814522	0.0185429	0.0104642	0.00836563
Dehalogenimonas	0.00649787	0.0225958	0	0.011554	0.000874937	0.00926097	0	0.0265899	0.00201734	0.00121723	0.00137819	0.00116404	0.037591	0.0327649	0.00201555	0.029421	0	0.0026102	0.0104196	0.0130553	0.00211055	0.00211055	0.00137718	0.000942623	0.00201502	0.011839	0.00795798	0.00377872	0.0122394	0.0358487	0.00201616	0.000874508	0.000942623	0.00121687	0.00260962	0.040369	0.0011636	0.0264898	0.00866122	0.0125203
Kyrpidia	0.00433191	0.0180766	0.00119384	0.0247586	0.00174987	0.0166698	0.00131741	0.0177266	0.0114316	0.00730336	0.00826913	0.00931229	0.0214805	0.0163824	0.00403109	0.0189135	0.00131741	0.00326275	0.0104183	0.00789042	0.00105528	0.00105528	0	0	0	0.0092081	0.00530532	0.00755744	0.0081596	0.00896218	0	0.00174902	0	0.000608435	0.00195722	0.018166	0.0011636	0.0194259	0.00468741	0.00613413
Moorella	0.00216596	0.0331405	0.000596919	0.00330115	0	0.00370439	0.000658705	0.0389984	0	0.000608613	0.00964732	0.00232807	0.0214805	0.0360413	0.0013437	0.0315225	0.000658705	0.0013051	0.0104168	0.0144568	0.000527638	0.000527638	0.00964028	0.000942623	0.00134335	0.00394633	0.00265266	0.00755744	0.0142793	0.00896218	0	0	0.000942623	0.000608435	0.00130481	0.0343136	0.00232721	0.0388518	0.00715155	0.0114655
Tsukamurella	0.00216596	0.0105447	0.00298459	0.0264092	0.0096243	0.0166698	0.00197612	0.0230445	0.00605201	0.00608613	0.00551276	0.00116404	0.0187955	0.0229354	0.000671849	0.0273195	0.00197612	0.00326275	0.0103997	0.00947751	0.00474874	0.00474874	0.00550873	0.00377049	0.000671673	0.0131544	0.0145896	0.020783	0.0101995	0.0268865	0.00604847	0.00961959	0.00377049	0.00608435	0.00326203	0.0222029	0.0011636	0.0229579	0.0100095	0.00820268
Rhodospirillum	0.00866382	0.0256086	0.00119384	0.0165057	0.000874937	0.0129654	0.00263482	0.0372258	0.00537956	0.00365168	0.00137819	0.00232807	0.0161104	0.0245736	0	0.016812	0.00263482	0.0078306	0.010354	0.0105733	0.00158291	0.00158291	0.00137718	0.00188525	0	0.0092081	0.0145896	0.0151149	0.020399	0.0179244	0.00537642	0.000874508	0.00188525	0.00365061	0.00782886	0.0201845	0.00232721	0.0370858	0.00904874	0.0099887
Oceanisphaera	0.0129957	0.00602555	0.000596919	0.00330115	0.0122491	0.00740878	0.00988058	0.00797696	0.00874179	0.00182584	0.0592621	0.00931229	0.0161104	0.0114677	0.00201555	0.00420301	0.00988058	0.0026102	0.0103258	0.0129686	0.00580401	0.00580401	0.0592189	0.00754098	0.00201502	0.00131544	0.00795798	0.00755744	0.0040798	0.00896218	0.00873668	0.0122431	0.00754098	0.00182531	0.00260962	0.0201845	0.00930882	0.00794695	0.0100362	0.0130423
Sphingosinicella	0.00866382	0.00903832	0.00298459	0.0165057	0	0.0129654	0.00526964	0.0398848	0.00470712	0.00852058	0.00689094	0.00582018	0.0214805	0.0196589	0.0013437	0.012609	0.00526964	0.0039153	0.0103071	0.00951902	0.00211055	0.00211055	0.00688591	0.00188525	0.00134335	0.0144699	0.0106106	0.0094468	0.0163192	0.0179244	0.00470436	0	0.00188525	0.00851809	0.00391443	0.0121107	0.00581801	0.0397347	0.00887734	0.00943988
Cloacibacterium	0.0173276	0.0165703	0.000596919	0.00495172	0.00174987	0.0111132	0.00263482	0.0159539	0.00403467	0.00365168	0.00826913	0.00349211	0.0268507	0.0212972	0.0013437	0.0189135	0.00263482	0.0228392	0.0102347	0.00866044	0.00211055	0.00211055	0.0082631	0.00659836	0.00134335	0.0105235	0.011937	0.0113362	0.0081596	0.0179244	0.00403231	0.00174902	0.00659836	0.00365061	0.0228342	0.0343136	0.00349081	0.0158939	0.00960385	0.00864916
Microlunatus	0.00649787	0.0210894	0.00119384	0.0132046	0.00349975	0.0111132	0.00526964	0.0230445	0.00403467	0.00304307	0.00413457	0.00116404	0.0322208	0.0212972	0.000671849	0.0231165	0.00526964	0.0039153	0.01021	0.00968505	0.00211055	0.00211055	0.00413155	0.00188525	0.000671673	0.0105235	0.00795798	0.0151149	0.0224389	0.00896218	0.00403231	0.00349803	0.00188525	0.00304218	0.00391443	0.018166	0.0011636	0.0229579	0.00747593	0.00737795
Kocuria	0.00216596	0.00602555	0.000596919	0.0511678	0.00787443	0.0296351	0.00724576	0.0132949	0.00806934	0.00669474	0.0110255	0.00582018	0.00268507	0.00982946	0.0013437	0.012609	0.00724576	0	0.010185	0.0122337	0.00580401	0.00580401	0.00964028	0.00471311	0.00604506	0.035517	0.0305056	0.0340085	0.0285586	0.0448109	0.0188175	0.0201137	0.00471311	0.0158193	0.0110909	0.0464243	0.00465441	0.0582776	0.0214065	0.0169259
Solimonas	0.00433191	0.0210894	0.00119384	0.0148552	0.00612456	0.0111132	0.00922187	0.0141813	0.0114316	0.0115636	0.00689094	0.00465614	0.0134253	0.0180207	0.00470294	0.0147105	0.00922187	0.0065255	0.0101811	0.00526747	0.00685929	0.00685929	0.00688591	0.00565574	0.00470171	0.0105235	0.00795798	0.0170042	0.0163192	0.00896218	0.0114249	0.00612156	0.00565574	0.0115603	0.00652405	0.018166	0.00465441	0.0141279	0.00944244	0.00439283
Candidatus Pelagibacter	0.00216596	0.0105447	0.00179076	0.0198069	0.00262481	0.0129654	0.00131741	0.0265899	0.00134489	0.000608613	0.00413457	0.00465614	0.037591	0.0245736	0.0026874	0.0273195	0.00131741	0	0.0101133	0.0118007	0.00263819	0.00263819	0.00413155	0.000942623	0.00268669	0.0197316	0.0172423	0.0170042	0.0122394	0.0268865	0.0013441	0.00262352	0.000942623	0.000608435	0	0.0544981	0.00465441	0.0264898	0.0109612	0.0142008
Acidihalobacter	0.00433191	0.00903832	0.00179076	0.00990344	0.00874937	0.00740878	0.00526964	0.0248172	0.0134489	0.0048689	0.0137819	0.00582018	0.0241656	0.00655297	0.00806219	0.021015	0.00526964	0.00717805	0.0100818	0.00681048	0.00263819	0.00263819	0.0137718	0.0103688	0.00806007	0.0105235	0.00795798	0.0151149	0.0122394	0	0.013441	0.00874508	0.0103688	0.00486748	0.00717646	0.0343136	0.00581801	0.0247238	0.0107093	0.00813989
Tistrella	0.00649787	0.019583	0	0.011554	0.00787443	0.00926097	0.00526964	0.0177266	0.00806934	0.00669474	0.00689094	0.00698422	0.0268507	0.0163824	0.0026874	0.0147105	0.00526964	0.0091357	0.0100801	0.00664397	0.00316583	0.00316583	0.00688591	0.00754098	0.00268669	0.011839	0.011937	0.0132255	0.0142793	0.00896218	0.00806462	0.00787057	0.00754098	0.00669279	0.00913367	0.0121107	0.00698162	0.0176599	0.00887461	0.00402219
Apibacter	0.0151617	0.0225958	0.000596919	0.011554	0.000874937	0.0129654	0.00131741	0.0221582	0.00268978	0.00426029	0.00275638	0	0.0241656	0.0311266	0.0013437	0.0231165	0.00131741	0.00326275	0.0100702	0.0104175	0.00263819	0.00263819	0.00275437	0.00377049	0.00134335	0.0157853	0.00530532	0.0094468	0.0081596	0	0.00268821	0.000874508	0.00377049	0.00425905	0.00326203	0.0423874	0	0.0220749	0.00728657	0.0104317
Bernardetia	0.00433191	0.0165703	0.00119384	0.0181563	0	0.0129654	0.00461094	0.0257035	0.00134489	0.00547752	0.00275638	0.00582018	0.0214805	0.0262119	0.0013437	0.025218	0.00461094	0.00326275	0.0100588	0.00953208	0.00158291	0.00158291	0.00275437	0.00942623	0.00134335	0.0092081	0.0106106	0.0170042	0.0061197	0.0268865	0.0013441	0	0.00942623	0.00547592	0.00326203	0.0605535	0.00581801	0.0256068	0.0110003	0.014672
Ignavibacterium	0.0194936	0.0180766	0.00119384	0.00330115	0.00612456	0.0111132	0.0131741	0.0115223	0.00403467	0.0048689	0.028942	0.00349211	0.0107403	0.0212972	0.0013437	0.00840601	0.0131741	0.00065255	0.0100528	0.00794297	0.00158291	0.00158291	0.00550873	0.00188525	0.000671673	0.00263089	0.00132633	0.00377872	0	0.0179244	0.000672052	0.00349803	0.00188525	0.000608435	0.000652405	0.0383505	0.00465441	0.0211919	0.00602249	0.00996847
Hyphomonas	0.00216596	0.0150639	0.00119384	0.011554	0.000874937	0.00740878	0.00329353	0.0301352	0.00605201	0.00182584	0.00826913	0.00232807	0.0187955	0.0311266	0.00201555	0.0315225	0.00329353	0.0039153	0.0100463	0.0108037	0.00369346	0.00369346	0.00550873	0.00754098	0.00201502	0.0092081	0.0106106	0.0170042	0.0122394	0.0358487	0.0100808	0.00524705	0.00754098	0.00730122	0.00326203	0.040369	0.00349081	0.0397347	0.0124661	0.0126338
Rummeliibacillus	0.00433191	0.0150639	0.000596919	0.00660229	0.000874937	0.00555658	0.000658705	0.0310215	0.00134489	0.000608613	0	0.00116404	0.0295358	0.0393178	0.00335924	0.037827	0.000658705	0.00195765	0.0100267	0.0140223	0.00105528	0.00105528	0	0	0.00335836	0.00657722	0.00530532	0.00188936	0.0122394	0.0806596	0.0013441	0.000874508	0	0.000608435	0.00195722	0.0302767	0.0011636	0.0309048	0.0099594	0.0200569
Rhodothermus	0.00649787	0.0210894	0	0.0198069	0	0.0148176	0.000658705	0.0248172	0.00134489	0.00243445	0.00413457	0.00116404	0.0295358	0.0278501	0.0013437	0.021015	0.000658705	0.00326275	0.010024	0.0109416	0.00105528	0.00105528	0.00413155	0	0.00134335	0.0144699	0.0172423	0.020783	0.0387581	0.0268865	0.0013441	0	0	0.00243374	0.00326203	0.0222029	0.0011636	0.0247238	0.0100475	0.0121064
Cellulosimicrobium	0.0151617	0.0150639	0.00179076	0.0264092	0.00437468	0.0222263	0.00922187	0.0177266	0.0161387	0.00304307	0.00413457	0	0.00268507	0.0131059	0.0026874	0.0147105	0.00922187	0.0026102	0.0100173	0.00783989	0.00474874	0.00474874	0.00413155	0.00282787	0.00268669	0.0092081	0.011937	0.0151149	0.0142793	0	0.0161292	0.00437254	0.00282787	0.00304218	0.00260962	0.0121107	0	0.0176599	0.00713527	0.00585351
Thermobacillus	0	0.0225958	0	0.0148552	0.00174987	0.0166698	0.00131741	0.0292488	0.000672445	0	0	0	0.0322208	0.0278501	0.000671849	0.0273195	0.00131741	0	0.00980495	0.0126066	0.000527638	0.000527638	0	0	0.000671673	0.0157853	0.00663165	0.0170042	0.0244788	0.0268865	0.000672052	0.00174902	0	0	0	0.0222029	0	0.0291388	0.00812646	0.011014
Gloeobacter	0	0.0135575	0	0.0165057	0.00349975	0.0185219	0.011198	0.0274762	0.00134489	0.000608613	0.00413457	0.00232807	0.0295358	0.0212972	0.00335924	0.0105075	0.011198	0.0013051	0.00979878	0.00958865	0.00105528	0.00105528	0.00413155	0.0103688	0.00335836	0.00394633	0.00795798	0.00755744	0.0163192	0.0179244	0.0013441	0.00349803	0.0103688	0.000608435	0.00130481	0.0282583	0.00232721	0.0273728	0.00826429	0.00877557
Blastochloris	0.00649787	0.0135575	0.00119384	0.0148552	0.00437468	0.0111132	0.00988058	0.0257035	0.00941423	0.00973781	0.00551276	0.00116404	0.0187955	0.0196589	0.0026874	0.00420301	0.00988058	0.0078306	0.00978117	0.00671151	0.00580401	0.00580401	0.00550873	0.0122541	0.00268669	0.00526177	0.00663165	0.0132255	0.0081596	0.0268865	0.00940873	0.00437254	0.0122541	0.00973497	0.00782886	0.0100922	0.0011636	0.0256068	0.00959358	0.00689103
Melaminivora	0.00216596	0.0316341	0.000596919	0.011554	0.00262481	0.00740878	0.000658705	0.0248172	0.00403467	0.00243445	0.00275638	0.00232807	0.040276	0.0229354	0.0013437	0.0147105	0.000658705	0.00195765	0.00971645	0.0121846	0.283869	0.283869	0.162508	0.52127	0.133663	0.124967	0.156507	0.139813	0.134633	0.0179244	0.490598	0.526454	0.52127	0.211736	0.289015	0.0141291	0.301373	0.0353198	0.241607	0.174008
Sandaracinus	0.00866382	0.0241022	0.00119384	0.0181563	0.00612456	0.0148176	0.00592835	0.0106359	0.00672445	0.00669474	0	0.00698422	0.0268507	0.0131059	0.00201555	0.0105075	0.00592835	0.0052204	0.00964747	0.00737834	0.00474874	0.00474874	0	0.00282787	0.00201502	0.0263089	0.00795798	0.0132255	0.0183591	0.0179244	0.00672052	0.00612156	0.00282787	0.00669279	0.00521924	0.0242214	0.00698162	0.0105959	0.00930539	0.00766057
Hoeflea	0.00649787	0.0165703	0	0.011554	0.000874937	0.00926097	0.00526964	0.0425438	0.00336223	0.00426029	0.00413457	0.00116404	0.0161104	0.0147442	0.0026874	0.0231165	0.00526964	0.00587295	0.00962743	0.0103892	0.00263819	0.00263819	0.00413155	0.00659836	0.00268669	0.00526177	0.00530532	0.0132255	0.0081596	0	0.00336026	0.000874508	0.00659836	0.00425905	0.00587165	0.0222029	0.0011636	0.0423837	0.00763107	0.0100872
Ezakiella	0	0.027115	0.00119384	0.00165057	0.000874937	0.00185219	0.00131741	0.0257035	0	0.000608613	0.00137819	0	0.040276	0.0393178	0.00201555	0.0273195	0.00131741	0.0013051	0.00962476	0.0146783	0.00105528	0.00105528	0.00137718	0	0.00201502	0.00263089	0.00265266	0.00566808	0.0020399	0.0537731	0	0.000874508	0	0.000608435	0.00130481	0.0504612	0	0.0256068	0.00839573	0.0169533
Gemmatimonas	0.00649787	0.0301277	0.00119384	0.0132046	0.00174987	0.0111132	0.00526964	0.0159539	0.000672445	0.0048689	0.00413457	0.00349211	0.0187955	0.0278501	0.000671849	0.021015	0.00526964	0.0013051	0.00962144	0.00946248	0.00105528	0.00105528	0.00413155	0.00188525	0.000671673	0.0144699	0.0106106	0.0226723	0.020399	0.0179244	0.000672052	0.00174902	0.00188525	0.00486748	0.00130481	0.0444059	0.00349081	0.0158939	0.00939691	0.0115718
Nissabacter	0.0108298	0.0105447	0.000596919	0.00660229	0.00612456	0.00926097	0.0164676	0.0106359	0.00537956	0.00304307	0.0110255	0.00931229	0.0241656	0.0131059	0.0026874	0.016812	0.0164676	0	0.00961455	0.0063216	0.0110804	0.0110804	0.0110175	0.0160246	0.00268669	0.00657722	0.0106106	0.0170042	0.0183591	0.0179244	0.00537642	0.00612156	0.0160246	0.00304218	0	0.0040369	0.00930882	0.0105959	0.00982619	0.00565655
Algibacter	0.0151617	0.0135575	0	0.00825287	0.000874937	0.0111132	0.00856317	0.0177266	0.00201734	0.00182584	0.0124037	0.00349211	0.0295358	0.00819122	0.0026874	0.0231165	0.00856317	0.0052204	0.00957241	0.0080416	0.000527638	0.000527638	0.0123946	0.00282787	0.00268669	0.011839	0.00397899	0	0.0081596	0.0179244	0.00201616	0.000874508	0.00282787	0.00182531	0.00521924	0.0383505	0.00349081	0.0176599	0.00739615	0.0096003
Arcticibacterium	0.00866382	0.0210894	0	0.00990344	0.000874937	0.00926097	0.00329353	0.0177266	0.000672445	0.00365168	0.00689094	0.00116404	0.0322208	0.0180207	0.0026874	0.0273195	0.00329353	0.0052204	0.00955301	0.00971374	0	0	0.00688591	0.00188525	0.00268669	0.00394633	0.00397899	0.00755744	0.0081596	0.0358487	0.000672052	0.000874508	0.00188525	0.00365061	0.00521924	0.0282583	0.0011636	0.0176599	0.00724069	0.0100347
Thermincola	0.00433191	0.0241022	0.000596919	0.00495172	0.000874937	0.00555658	0.000658705	0.0221582	0.000672445	0.00121723	0.00275638	0.00116404	0.0429611	0.0294884	0.0013437	0.0273195	0.000658705	0.00065255	0.00952585	0.0132607	0	0	0.00275437	0	0.00134335	0.00526177	0.00397899	0.0151149	0.0101995	0.0179244	0.000672052	0.000874508	0	0.00121687	0.000652405	0.018166	0.0011636	0.0220749	0.0056332	0.007504
Curtobacterium	0.00866382	0.0165703	0.00179076	0.0198069	0.00524962	0.0148176	0.00461094	0.0177266	0.00134489	0.00608613	0.00275638	0.00582018	0.0268507	0.0147442	0.00201555	0.0147105	0.00461094	0.00326275	0.00952437	0.00753799	0.00369346	0.00369346	0.00275437	0.000942623	0.00201502	0.0263089	0.011937	0.0132255	0.0265187	0.00896218	0.0013441	0.00524705	0.000942623	0.00608435	0.00326203	0.0282583	0.00581801	0.0176599	0.00937042	0.00931348
Marinobacter	0.00433191	0.0120511	0.00119384	0.00990344	0.00174987	0.00740878	0.00263482	0.0292488	0.000672445	0.00121723	0.00275638	0.0104763	0.0322208	0.0212972	0.0013437	0.0273195	0.00263482	0.0026102	0.00950396	0.0106577	0.0353517	0.0353517	0.216218	0.0612705	0.0188068	0.0578795	0.0596849	0.0869105	0.0652768	0.107546	0.0537642	0.0577175	0.0612705	0.0413736	0.0215294	0.151384	0.0325809	0.143928	0.072658	0.0517176
Candidatus Solibacter	0.00433191	0.0120511	0.00179076	0.00825287	0.00437468	0.00740878	0.00724576	0.0159539	0.00941423	0.00365168	0.00689094	0.00931229	0.0187955	0.0196589	0.00470294	0.0273195	0.00724576	0.0026102	0.00950065	0.00683994	0.0042211	0.0042211	0.00688591	0.00659836	0.00470171	0.0144699	0.0145896	0.0132255	0.020399	0.0179244	0.00940873	0.00437254	0.00659836	0.00365061	0.00260962	0.0302767	0.00930882	0.0158939	0.0105198	0.00735061
Bradymonas	0.00866382	0.0180766	0.000596919	0.0148552	0.00524962	0.0129654	0.00329353	0.0257035	0.00672445	0.00243445	0.00413457	0.00349211	0.0214805	0.0278501	0.000671849	0.0105075	0.00329353	0.00065255	0.00948035	0.00878455	0.00263819	0.00263819	0.00413155	0	0.000671673	0.0171008	0.0145896	0.0283404	0.0224389	0.0358487	0.00672052	0.00524705	0	0.00243374	0.000652405	0.0484428	0.00349081	0.0256068	0.0122773	0.014367
Maritalea	0.00649787	0.0301277	0.000596919	0.00660229	0.00174987	0.00740878	0.00131741	0.0283625	0.000672445	0.00182584	0.00689094	0.00232807	0.0268507	0.0212972	0	0.025218	0.00131741	0.0013051	0.00946495	0.0111567	0	0	0.00137718	0.00377049	0	0.00394633	0.00397899	0.00377872	0.0020399	0	0.000672052	0.00699606	0.00377049	0.00243374	0.00130481	0.0100922	0	0.00971294	0.002993	0.00318219
Vogesella	0	0.0165703	0.00238767	0.00495172	0.00612456	0.00555658	0.00724576	0.0150676	0.0073969	0.00304307	0.0110255	0.0151325	0.00537014	0.0180207	0.00671849	0.00630451	0.00724576	0.0313224	0.00941578	0.00744974	0.00633165	0.00633165	0.0110175	0.00942623	0.00671673	0.00789266	0.011937	0.0113362	0.0142793	0.0179244	0.00739257	0.00612156	0.00942623	0.00304218	0.0313154	0.0161476	0.0151268	0.0150109	0.0114876	0.00643715
Carboxydocella	0.00649787	0.0210894	0.000596919	0.00495172	0.000874937	0.00555658	0.00131741	0.0212719	0	0	0.00275638	0	0.0322208	0.0409561	0.0013437	0.0273195	0.00131741	0.0013051	0.00940976	0.0130129	0.00158291	0.00158291	0.00275437	0.000942623	0.00134335	0.00394633	0.00530532	0.0113362	0.0020399	0.0179244	0	0.000874508	0.000942623	0	0.00130481	0.0524797	0	0.0211919	0.00697509	0.0129338
Friedmanniella	0.00649787	0.0165703	0.00179076	0.0165057	0.00612456	0.0129654	0.00395223	0.0141813	0.0141213	0.00608613	0.00275638	0.00814825	0.0161104	0.0147442	0.00470294	0.016812	0.00395223	0.00326275	0.0094047	0.00564185	0.00369346	0.00369346	0.00275437	0.00659836	0.00470171	0.0223625	0.011937	0.020783	0.0081596	0.0179244	0.0141131	0.00612156	0.00659836	0.00608435	0.00326203	0.018166	0.00814522	0.0141279	0.00995702	0.0064266
Robiginitalea	0.0108298	0.0210894	0.00119384	0.0264092	0.00174987	0.0203741	0.00197612	0.0194992	0.00201734	0.00304307	0.00275638	0.00349211	0.0134253	0.00982946	0.00201555	0.0189135	0.00197612	0.0078306	0.00935672	0.00848642	0.00158291	0.00158291	0.00275437	0.00282787	0.00201502	0.0210471	0.0106106	0.0358978	0.0040798	0	0.00201616	0.00174902	0.00282787	0.00304218	0.00782886	0.018166	0.00349081	0.0194259	0.00783029	0.00966223
Saccharibacillus	0	0.027115	0	0.00825287	0	0.00926097	0.00131741	0.0257035	0.00134489	0.00121723	0.00689094	0.00232807	0.0241656	0.0360413	0.000671849	0.0189135	0.00131741	0.00195765	0.0092499	0.0116677	0.00105528	0.00105528	0.00688591	0	0.000671673	0.00657722	0.00530532	0.0094468	0.0040798	0.0268865	0.0013441	0	0	0.00121687	0.00195722	0.0302767	0.00232721	0.0256068	0.00692738	0.00991554
Pelolinea	0.00216596	0.0210894	0	0.00330115	0	0.00370439	0.00526964	0.0292488	0	0	0.00275638	0.00116404	0.0268507	0.0376796	0.000671849	0.025218	0.00526964	0.00195765	0.00924151	0.0124563	0.000527638	0.000527638	0.00275437	0.00377049	0.000671673	0.00131544	0.00265266	0.00755744	0.0122394	0.0268865	0	0	0.00377049	0	0.00195722	0.0262398	0.0011636	0.0291388	0.00673185	0.0100078
Azorhizobium	0.0129957	0.0120511	0.00238767	0.0148552	0.00612456	0.0148176	0.00197612	0.0194992	0.0114316	0.00730336	0.00275638	0.00698422	0.0134253	0.0147442	0.00201555	0.0147105	0.00197612	0.00587295	0.00921818	0.00568293	0.00633165	0.00633165	0.00275437	0.000942623	0.00201502	0.0092081	0.00397899	0.00566808	0.0081596	0.00896218	0.0114249	0.00612156	0.000942623	0.00730122	0.00587165	0.0161476	0.00698162	0.0194259	0.00714274	0.00483585
Candidatus Promineofilum	0.00433191	0.0150639	0.00119384	0.023108	0.00524962	0.0148176	0.000658705	0.0186129	0.00336223	0.00304307	0.00137819	0.00465614	0.0107403	0.0344031	0.0026874	0.0147105	0.000658705	0.00717805	0.00921412	0.00928483	0.0042211	0.0042211	0.00137718	0.00188525	0.00268669	0.0171008	0.0132633	0.0170042	0.0163192	0.0179244	0.00336026	0.00524705	0.00188525	0.00304218	0.00717646	0.0121107	0.00465441	0.0185429	0.00844569	0.00652944
Gluconobacter	0.00216596	0.0256086	0.00179076	0.0132046	0.00174987	0.00926097	0.00395223	0.0212719	0.00537956	0.00365168	0.00413457	0.00232807	0.0161104	0.0262119	0	0.0231165	0.00395223	0.00195765	0.00921375	0.00917845	0.00263819	0.00263819	0.00413155	0.00377049	0	0.00526177	0.00928431	0.00755744	0.0081596	0.00896218	0.00537642	0.00174902	0.00377049	0.00365061	0.00195722	0.0222029	0.00232721	0.0211919	0.0063683	0.00615453
Clavibacter	0.00216596	0.0135575	0.000596919	0.0198069	0.00262481	0.0129654	0.00263482	0.0168402	0.00941423	0.00426029	0.00551276	0.00232807	0.0322208	0.0196589	0.0026874	0.012609	0.00263482	0.00326275	0.00921009	0.00864621	0.00211055	0.00211055	0.00550873	0.00282787	0.00268669	0.0157853	0.0106106	0.0170042	0.0163192	0.00896218	0.00940873	0.00262352	0.00282787	0.00425905	0.00326203	0.0222029	0.00232721	0.0167769	0.00820079	0.00665757
Microvirgula	0.00433191	0.00451916	0.000596919	0.00330115	0.0113742	0.00370439	0.0125154	0.00797696	0.0201734	0.00730336	0.0192946	0.0104763	0.0134253	0.0114677	0.00470294	0.00840601	0.0125154	0.0091357	0.00917893	0.00533697	0.0100251	0.0100251	0.0192806	0.0131967	0.00470171	0.00131544	0.0106106	0.0113362	0.0101995	0	0.0201616	0.0113686	0.0131967	0.00730122	0.00913367	0.0100922	0.0104724	0.00794695	0.0100202	0.00502853
Ectothiorhodospira	0.00649787	0.027115	0.00179076	0.011554	0.0113742	0.00926097	0.00526964	0.0150676	0.00874179	0.00730336	0.00413457	0.0128044	0.0107403	0.0180207	0.0013437	0.00840601	0.00526964	0	0.00914969	0.00654541	0.00527638	0.00527638	0.00413155	0.0084836	0.00134335	0.00657722	0.00928431	0.0132255	0.0081596	0	0.00873668	0.0113686	0.0084836	0.00730122	0	0.0141291	0.0127996	0.0150109	0.00775487	0.00456739
Antarcticibacterium	0.0129957	0.0150639	0.00119384	0.00660229	0	0.00926097	0.00329353	0.0265899	0.00134489	0.0048689	0.00689094	0.00116404	0.040276	0.0147442	0	0.0105075	0.00329353	0.0052204	0.00907281	0.0103617	0.00158291	0.00158291	0.00688591	0.00188525	0.00268669	0.00789266	0.0106106	0.00377872	0.0061197	0.00896218	0.0013441	0	0.00188525	0.00486748	0.00521924	0.0262398	0.0011636	0.0264898	0.00662205	0.00777889
Sulfurimonas	0.00216596	0.00753194	0	0.00990344	0.00262481	0.00740878	0	0.0283625	0.00134489	0.00304307	0.00413457	0.00232807	0.0349059	0.0344031	0.00201555	0.021015	0	0.00195765	0.00906362	0.011961	0.00580401	0.00580401	0.00413155	0.00188525	0.00201502	0.00789266	0.00795798	0.026451	0.0101995	0.0627353	0.0013441	0.00262352	0.00188525	0.00304218	0.00195722	0.0504612	0.00232721	0.0282558	0.0125985	0.0179469
Tatumella	0.0194936	0.0180766	0.000596919	0.0132046	0.00349975	0.0166698	0.00592835	0.0168402	0.00201734	0.0048689	0.0165383	0.00465614	0.00805521	0.0147442	0.0013437	0.0105075	0.00592835	0	0.00905386	0.00671896	0.00211055	0.00211055	0.0165262	0.0084836	0.00134335	0.00657722	0.0106106	0.0094468	0.0061197	0.00896218	0.00201616	0.00349803	0.0084836	0.00486748	0	0.0100922	0.00465441	0.0167769	0.00681553	0.00484755
Oenococcus	0.00216596	0.0316341	0	0.00660229	0.00174987	0.00555658	0.00197612	0.0194992	0.000672445	0.00243445	0.00826913	0	0.0295358	0.0262119	0.000671849	0.0231165	0.00197612	0.00065255	0.00904027	0.0112963	0.00158291	0.00158291	0.0082631	0	0.000671673	0.0092081	0.00265266	0.00755744	0.0061197	0.0179244	0.000672052	0.00174902	0	0.00243374	0.000652405	0.0262398	0	0.0194259	0.00592977	0.00776209
Archangium	0.00866382	0.0180766	0.000596919	0.0181563	0.00524962	0.0148176	0.00395223	0.0194992	0.00806934	0.0048689	0.00413457	0.00465614	0.0134253	0.0114677	0.0026874	0.0147105	0.00395223	0.00456785	0.00897513	0.00605995	0.00316583	0.00316583	0.00413155	0.000942623	0.00268669	0.0144699	0.019895	0.0188936	0.0265187	0	0.00806462	0.00524705	0.000942623	0.00486748	0.00456684	0.0242214	0.00465441	0.0194259	0.00921444	0.00876498
Candidatus Kinetoplastibacterium	0.00433191	0.0120511	0.000596919	0.00825287	0.00262481	0.00740878	0.00526964	0.0159539	0.000672445	0.00182584	0.0110255	0.00116404	0.0268507	0.0278501	0.000671849	0.025218	0.00526964	0.00326275	0.0089056	0.00922614	0.00211055	0.00211055	0.0110175	0.00188525	0.000671673	0.00394633	0.00663165	0.0094468	0.0163192	0.0537731	0.000672052	0.00262352	0.00188525	0.00182531	0.00326203	0.0201845	0.0011636	0.0158939	0.00863459	0.0127998
Seonamhaeicola	0.00649787	0.00903832	0.000596919	0.00825287	0.00174987	0.00740878	0.00329353	0.0221582	0.00201734	0.00304307	0.00826913	0.00232807	0.0214805	0.0294884	0	0.0273195	0.00329353	0.0039153	0.00889729	0.00944922	0.00263819	0.00263819	0.0082631	0.00377049	0	0.0144699	0.00663165	0.0151149	0.0040798	0.0179244	0.00201616	0.00174902	0.00377049	0.00304218	0.00391443	0.0282583	0.00232721	0.0220749	0.00792684	0.00812511
Azospira	0.00649787	0.0150639	0	0.00825287	0.00787443	0.00740878	0.00988058	0.0132949	0.00806934	0.00791197	0.00689094	0.00931229	0.00805521	0.0114677	0.00403109	0.021015	0.00988058	0.0052204	0.00889599	0.00450558	0.00527638	0.00527638	0.00688591	0.00942623	0.00403004	0	0	0.00755744	0.0101995	0.0448109	0.00806462	0.00787057	0.00942623	0.00790966	0.00521924	0.0302767	0.00930882	0.0132449	0.0102658	0.0107507
Nitrospirillum	0.00216596	0.0180766	0.00238767	0.011554	0.00437468	0.00740878	0.00329353	0.0283625	0.0134489	0.0048689	0.00551276	0.00116404	0.0241656	0.0163824	0.0013437	0.00840601	0.00329353	0.0039153	0.00889583	0.00812709	0.00580401	0.00580401	0.00550873	0.00188525	0.00134335	0.0131544	0.0212213	0.0170042	0.0163192	0.0358487	0.013441	0.00437254	0.00188525	0.00486748	0.00391443	0.0121107	0.0011636	0.0282558	0.0107724	0.00990245
Plesiomonas	0.0129957	0.0180766	0.00119384	0.00495172	0.00524962	0.00926097	0.00922187	0.0177266	0.0141213	0.00365168	0.00689094	0.00465614	0.0187955	0.0163824	0.0013437	0.00630451	0.00922187	0	0.00889139	0.00614212	0.00791456	0.00791456	0.00688591	0.00377049	0.00134335	0.00131544	0.00397899	0.0151149	0.0061197	0.00896218	0.0141131	0.00524705	0.00377049	0.00365061	0	0.0161476	0.00465441	0.0176599	0.0071424	0.00532914
Candidatus Symbiobacter	0	0.00150639	0.00119384	0.00990344	0.0244982	0.0111132	0.0164676	0.00443164	0.018156	0.00973781	0.00826913	0.0151325	0.00537014	0	0.00537479	0.0021015	0.0164676	0.00978825	0.00886178	0.00708632	0.00738693	0.00738693	0.0082631	0.0339344	0.00537338	0.0092081	0.00928431	0.00566808	0.0081596	0	0.0181454	0.0244862	0.0339344	0.00973497	0.00978608	0.0040369	0.0151268	0.00441497	0.0119073	0.00973458
Brucella	0.00216596	0.0150639	0	0.00825287	0.00612456	0.00555658	0.00856317	0.0265899	0.00134489	0.00182584	0.0137819	0.00349211	0.0187955	0.0180207	0.0026874	0.012609	0.00856317	0.0052204	0.00881432	0.00728446	0.00105528	0.00105528	0.0137718	0.00942623	0.00268669	0.00526177	0.0106106	0.00566808	0.0122394	0.00896218	0.0013441	0.00612156	0.00942623	0.00182531	0.00521924	0.0282583	0.00349081	0.0264898	0.00849515	0.00790607
Gemmatirosa	0.00866382	0.0210894	0.00238767	0.0214575	0.00524962	0.0166698	0.00263482	0.0106359	0.000672445	0.00182584	0.00551276	0.00349211	0.0187955	0.0147442	0	0.016812	0.00263482	0.0052204	0.00880548	0.00747415	0.000527638	0.000527638	0.00550873	0.000942623	0	0.0210471	0.0106106	0.026451	0.0265187	0.00896218	0.000672052	0.00524705	0.000942623	0.00182531	0.00521924	0.0242214	0.00349081	0.0105959	0.00851726	0.00950346
Sulfuriferula	0.00649787	0.00753194	0	0.00660229	0.0122491	0.00740878	0.00922187	0.00443164	0.0208458	0.00608613	0.0110255	0.00698422	0.0134253	0.00491473	0.00470294	0.0147105	0.00922187	0.0123984	0.00879217	0.0047547	0.00580401	0.00580401	0.0110175	0.00282787	0.00470171	0.00657722	0.00397899	0.00377872	0.0040798	0	0.0208336	0.0122431	0.00282787	0.00608435	0.0123957	0.0100922	0.00698162	0.00441497	0.00691352	0.00485815
Pragia	0.00649787	0.00753194	0.00119384	0.00660229	0.0096243	0.00740878	0.00263482	0.0141813	0.00806934	0.00243445	0.0151601	0.0104763	0.0161104	0.0245736	0.00201555	0.0189135	0.00263482	0.00195765	0.00877894	0.00668127	0.00633165	0.00633165	0.015149	0.00282787	0.00201502	0.00657722	0.00530532	0.00755744	0.0061197	0.0358487	0.00806462	0.00961959	0.00282787	0.00243374	0.00195722	0.0282583	0.0104724	0.0141279	0.00954585	0.00912572
[truncated: 605 more rows]

## Sheet: Kraken_Bacteria_Species
Taxa	TRZ728	TRZ721	TRZ718	TRZ689	TRZ679	TRZ677	TRZ674	TRZ578	TRZ577	TRZ562	TRZ531	TRZ511	TRZ505	TRZ1480	TRZ1474	TRZ1469	TRZ1464	TRZ1429	Lushoto (Mean)	Lushoto (SD)	TMP018060	TMP018046	TMP018032	TMP018027	TMP018023	TMP018016	TMP018001	TMP017982	TMP017926	TMP017921	TMP017909	TMP017891	TMP017887	TMP017871	TMP017852	TMP017811	TMP017800	TMP017787	Rungwe (Mean)	Rungwe (SD)
[truncated: 4,483 more rows]

## Sheet: Kraken_Archaea_Phylum
Taxa	TRZ1429	TRZ1464	TRZ1469	TRZ1474	TRZ1480	TRZ505	TRZ511	TRZ531	TRZ562	TRZ577	TRZ578	TRZ674	TRZ677	TRZ679	TRZ689	TRZ718	TRZ728	TRZ721	Lushoto (Mean)	Lushoto (SD)	TMP17787	TMP17871	TMP17852	TMP17811	TMP17800	TMP17921	TMP17909	TMP17891	TMP17788	TMP17926	TMP17982	TMP18001	TMP18016	TMP18023	TMP18027	TMP18032	TMP18046	TMP18060	Rungwe (Mean)	Rungwe (SD)
[truncated: 5 more rows]

[truncated: 11 more sheets: Kraken_Archaea_Family, Kraken_Archaea_Genus, Kraken_Archaea_Species, MG-RAST_Bacteria_Phylum, MG-RAST_Bacteria_Family, MG-RAST_Bacteria_Genus, MG-RAST_Bacteria_Species, MG-RAST_Archaea_Phylum, MG-RAST_Archaea_Family, MG-RAST_Archaea_Genus, MG-RAST_Archaea_Species]
